# Supplementary material for: Effectiveness, safety and costs of the FreeStyle Libre glucose monitoring system for children and adolescents with type 1 diabetes in Spain: a prospective, uncontrolled, pre-post study
Source: PubMed Central journal article supplement — BMJ Open. 2023 Dec 13;13(12):e071334. doi: 10.1136/bmjopen-2022-071334 (PMC10729222; doi:10.1136/bmjopen-2022-071334), 2023-12-13
Supplement: bmjopen-2022-071334.draft_revisions.pdf [file bmjopen-2022-071334.draft_revisions.pdf]

# BMJ Open

BMJ Open is committed to open peer review. As part of this commitment we make the peer review history of every article we publish publicly available.

When an article is published we post the peer reviewers' comments and the authors' responses online. We also post the versions of the paper that were used during peer review. These are the versions that the peer review comments apply to.

The versions of the paper that follow are the versions that were submitted during the peer review process. They are not the versions of record or the final published versions. They should not be cited or distributed as the published version of this manuscript.

BMJ Open is an open access journal and the full, final, typeset and author-corrected version of record of the manuscript is available on our site with no access controls, subscription charges or pay-per-view fees (<http://bmjopen.bmj.com>).

If you have any questions on BMJ Open's open peer review process please email [info.bmjopen@bmj.com](mailto:info.bmjopen@bmj.com)

# BMJ Open

## Effectiveness, safety and costs of the FreeStyle Libre Glucose Monitoring System for children and adolescents with T1DM in Spain: A multicentre prospective observational study

|                               |                                                                                                                                                                                                                                                                                                                                                                                                                                                                                                                                                                                                                                                                                                                                                                                                                                                                                                                                                                                                                                                                                                                                  |
|-------------------------------|----------------------------------------------------------------------------------------------------------------------------------------------------------------------------------------------------------------------------------------------------------------------------------------------------------------------------------------------------------------------------------------------------------------------------------------------------------------------------------------------------------------------------------------------------------------------------------------------------------------------------------------------------------------------------------------------------------------------------------------------------------------------------------------------------------------------------------------------------------------------------------------------------------------------------------------------------------------------------------------------------------------------------------------------------------------------------------------------------------------------------------|
| Journal:                      | <i>BMJ Open</i>                                                                                                                                                                                                                                                                                                                                                                                                                                                                                                                                                                                                                                                                                                                                                                                                                                                                                                                                                                                                                                                                                                                  |
| Manuscript ID                 | bmjopen-2022-071334                                                                                                                                                                                                                                                                                                                                                                                                                                                                                                                                                                                                                                                                                                                                                                                                                                                                                                                                                                                                                                                                                                              |
| Article Type:                 | Original research                                                                                                                                                                                                                                                                                                                                                                                                                                                                                                                                                                                                                                                                                                                                                                                                                                                                                                                                                                                                                                                                                                                |
| Date Submitted by the Author: | 26-Jan-2023                                                                                                                                                                                                                                                                                                                                                                                                                                                                                                                                                                                                                                                                                                                                                                                                                                                                                                                                                                                                                                                                                                                      |
| Complete List of Authors:     | Gonzalez-Pacheco, Himar; Fundacion Canaria Instituto de Investigacion Sanitaria de Canarias<br>Rivero-Santana, Amado ; Fundacion Canaria Instituto de Investigacion Sanitaria de Canarias<br>Ramallo Farina, Yolanda; Fundación Canaria Instituto de Investigación Sanitaria de Canarias<br>Valcárcel-Nazco, Cristina; Fundacion Canaria Instituto de Investigacion Sanitaria de Canarias<br>Álvarez-Pérez, Yolanda; Fundacion Canaria Instituto de Investigacion Sanitaria de Canarias<br>García-Pérez, Lidia; Fundacion Canaria Instituto de Investigacion Sanitaria de Canarias, Servicio de Evaluación del Servicio Canario de la Salud (SESCS)<br>García-Bello, Miguel Angel; Fundacion Canaria Instituto de Investigacion Sanitaria de Canarias<br>Perestelo-Pérez, Lilisbeth; Servicio de Evaluación y Planificación del Servicio Canario de la Salud; Red de Investigación en Servicios de Salud en Enfermedades Crónicas (REDISSEC),<br>Serrano-Aguilar, Pedro; Servicio de Evaluación y Planificación del Servicio Canario de la Salud; Red de Investigación en Servicios de Salud en Enfermedades Crónicas (REDISSEC) |
| Keywords:                     | Paediatric endocrinology < DIABETES & ENDOCRINOLOGY, PUBLIC HEALTH, Health economics < HEALTH SERVICES ADMINISTRATION & MANAGEMENT                                                                                                                                                                                                                                                                                                                                                                                                                                                                                                                                                                                                                                                                                                                                                                                                                                                                                                                                                                                               |
|                               |                                                                                                                                                                                                                                                                                                                                                                                                                                                                                                                                                                                                                                                                                                                                                                                                                                                                                                                                                                                                                                                                                                                                  |

SCHOLARONE™  
Manuscripts

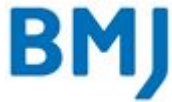

I, the Submitting Author has the right to grant and does grant on behalf of all authors of the Work (as defined in the below author licence), an exclusive licence and/or a non-exclusive licence for contributions from authors who are: i) UK Crown employees; ii) where BMJ has agreed a CC-BY licence shall apply, and/or iii) in accordance with the terms applicable for US Federal Government officers or employees acting as part of their official duties; on a worldwide, perpetual, irrevocable, royalty-free basis to BMJ Publishing Group Ltd ("BMJ") its licensees and where the relevant Journal is co-owned by BMJ to the co-owners of the Journal, to publish the Work in this journal and any other BMJ products and to exploit all rights, as set out in our [licence](#).

The Submitting Author accepts and understands that any supply made under these terms is made by BMJ to the Submitting Author unless you are acting as an employee on behalf of your employer or a postgraduate student of an affiliated institution which is paying any applicable article publishing charge ("APC") for Open Access articles. Where the Submitting Author wishes to make the Work available on an Open Access basis (and intends to pay the relevant APC), the terms of reuse of such Open Access shall be governed by a Creative Commons licence – details of these licences and which [Creative Commons](#) licence will apply to this Work are set out in our licence referred to above.

Other than as permitted in any relevant BMJ Author's Self Archiving Policies, I confirm this Work has not been accepted for publication elsewhere, is not being considered for publication elsewhere and does not duplicate material already published. I confirm all authors consent to publication of this Work and authorise the granting of this licence.

**Title**

**Effectiveness, safety and costs of the FreeStyle Libre Glucose Monitoring System for children and adolescents with T1DM in Spain: A multicentre prospective observational study**

**Author names and affiliations**

Himar González-Pacheco<sup>1,2,3,4</sup>, Amado Rivero-Santana<sup>1,2,3,4</sup>, Yolanda Ramallo-Fariña<sup>1,2,3,4</sup>, Cristina Valcárcel-Nazco<sup>1,2,3,4</sup>, Yolanda Álvarez-Pérez<sup>1,2,3,4</sup>, Lidia García-Pérez<sup>1,2,3,4</sup>, Miguel Ángel García-Bello<sup>1,2,3,4</sup>, Lilisbeth Perestelo-Pérez<sup>1,2,3,4,5</sup>, Pedro Serrano-Aguilar<sup>1,2,3,4,5</sup>, Health Professional Group.

1. Canary Islands Health Research Institute Foundation (FIISC), Tenerife, Spain
2. Spanish Network of Agencies for Assessing National Health System Technologies and Performance (RedETS), Spain
3. Network for Research on Chronicity, Primary Care, and Health Promotion (RICAPPS), Tenerife, Spain
4. Institute of Biomedical Technologies (ITB), Tenerife, Spain
5. Evaluation Unit (SESCS), Canary Islands Health Services (SCS), Tenerife, Spain

**Corresponding autor**

Himar González Pacheco  
Himar.gonzalezpacheco@sescs.es

**Abstract****Objectives**

This study aims to evaluate the effectiveness, safety and costs of the FreeStyle Libre® (FSL) for Type 1 Diabetes Mellitus (T1DM) in childhood and adolescence.

**Design**

Prospective multicentre observational study.

**Setting**

Study carried out in 13 public hospitals throughout Spain. Patients were recruited between January 2019 and March 2020, with a 12-month follow-up.

**Participants**

165 patients with ages between 4 and 17 years and diagnosis of diabetes were included.

**Primary and secondary outcome measures**

The primary outcome was the change in HbA1c level from baseline to follow up. Mixed regression models with repeated measures were used. The cost intervention was estimated from the National Health System (NHS) perspective.

**Results**

There were 156 subjects included in the analysis. A statistically significant reduction of HbA1c was observed in the subgroup with baseline HbA1c $\geq$ 7.5% (-0.46%, -0.49% and -0.35% at 3, 6 and 12 months, respectively), whereas well-controlled patients revealed a significant 12-month worsening (0.32%) ( $P<0.001$  for the interaction). For the whole sample, there was a statistically significant reduction of severe hypoglycaemic events compared to the previous year (-0.37,  $P=0.004$ ). Although the interaction with baseline HbA1c group did not attain statistical significance, descriptive results indicate that reduction could occur only in well-controlled patients. Adolescents showed a significantly lower sensor usage time and scans per day than children. Reduction of HbA1c was related to device adherence. No serious adverse effects were observed. The use of FSL could reduce total direct costs from the NHS perspective.

**Conclusions**

The results suggest that use of FSL in underage T1DM patients is related to a statistically significant reduction of severe hypoglycaemia. HbA1c was significantly improved only in patients with poor baseline control. Monitoring costs attributed to test strips and lancets, as well as costs attributable to caregivers' productivity loss, are reduced among FSL users.

**What is already known on this topic**

Glucose monitoring devices may help people with diabetes monitor their glycaemia levels and the acute complications of the disease, thus improving their health-related quality of life.

**What this study adds**

This study provides nationally contextualised real-world scientific evidence on the effectiveness, safety and costs of the flash glucose monitoring systems (FreeStyle Libre® system [FSL]) indicated for DM1 in childhood and adolescence in Spain.

**How this study might affect research, practice or policy**

These findings support that the use of FSL reduces severe hypoglycaemia in underage T1DM patients. In addition, glucose levels are reduced in patients with HbA1c levels greater than 7.5%.

The use of FSL reduces the cost of disease monitoring in addition to costs attributable to lost productivity of parents/caregivers in underage patients with T1DM.

**Keywords**

Continuous glucose monitoring, HbA1c, Type 1 diabetes, costs, Spain.

**Word count** 4094

## Introduction

Type 1 Diabetes Mellitus (T1DM) requires continuous medical monitoring, to reduce the development of vascular complications [1,2]. The early onset and chronic character of this condition increase the likelihood of reducing health-related quality of life (HRQoL) and health expectancy among young T1DM people [3]. A total of 586,000 children aged under 15 years suffer from T1DM globally [4]. In Spain, the incidence is 11.5-27.6/100,000[5], which represents a high cost to society [6].

To reduce the risk of short (metabolic) and long-term (vascular) diabetes complications, frequent determination of blood glucose levels is required. Continuous glucose monitoring systems, such as the flash glucose monitoring (FGM) systems contribute to glycaemia monitoring, as well as to reduce the daily number of fingersticks [7]; providing dynamic information to the user about their glucose level. FreeStyle Libre® (FSL), developed and marketed in Spain by Abbott Laboratories, has been indicated to measure glucose levels in the interstitial fluid in people aged over four years with T1DM. No serious adverse effects related to the use of these devices have been reported. Mild effects consist of skin problems in the area where the sensor is inserted, similar to other FGM [8,9].

FSL consists of: 1) an arm sensor that measures and stores interstitial glucose levels, wearable for 14 days [10]; 2) a reader that obtains glucose readings from the sensor when placed at a distance between 1-4 cm, storing up to 90 days of glucose measures and user-entered notes. The Libre View® software and the FreeStyle Libre Link® and LibreLinkUp® Apps enables obtaining reports with the daily patterns of glucose levels.

Observational studies have revealed that the frequent use of FGM significantly reduced the frequency of hypoglycaemia and the level of HbA1c in patients with T1DM, compared to the conventional finger-pricking method [11]. In addition, the use of FGM can improve HRQoL and Diabetes Distress [12]. However, the existing literature is of limited scientific validity, so further studies are required to evaluate the effectiveness and safety of using FGM in young populations, as well as the use of resources in daily clinical practice.

The Spanish Network of Health Technology Assessment Agencies of the National Health System (RedETS) published a report in 2016 [13], later updated in 2017 [14], developed by the Canary Islands Health Service Evaluation Department (SESCS) [15], as part of RedETS [16], about the effectiveness, safety and cost-effectiveness of FSL in patients with T1DM and T2DM. From their conclusions and recommendations [17], the Spanish Ministry of Health assigned a post-launch evidence generation study to provide real world information on the effectiveness, safety, acceptability and potential use barriers, as well as on healthcare resources use and costs in the Spanish National Health Service. This publication aims to evaluate the effectiveness, safety and costs of the FSL for T1DM in childhood and adolescence to inform health policy decision-making at national level in regard to coverage and public funding in these population groups [18].

## Material and methods

### Study Design

Prospective multicentre observational study carried out in 13 public hospitals throughout Spain. Patients were recruited between January 2019 and March 2020, with a 12-month follow-up.

### Participants

Patients were included if they were aged 4 to 17 years-old, diagnosed with T1DM at least one year before the start of the study, were on intensive insulin therapy, required more than six fingersticks per day and agreed to take part.

We excluded patients with hypoglycaemia unawareness (judged by the clinician); current systemic corticosteroid treatment for more than two weeks in the last three months; previous (within the last 12 months) or current use of a FGM device; pregnant adolescents; allergies to device adhesives; unwillingness to take part; absence of patient/caregiver skills to make appropriate use of the technology; and failure to sign informed consent.

### Setting, logistics and recruitment

The study protocol was devised by SESCO researchers with the assistance of clinical experts from all participant hospitals, representatives of patient associations and the industry. A centralized information system (SIEM) was developed on the Spanish Ministry of Health's intranet, accessible both for the clinical researchers responsible for recruitment, clinical examination and data collection, as well as SESCO researchers.

Clinical researchers from participant hospitals were in charge of recruiting patients, informing and training both patients and caregivers and collecting self-reported and electronic health record stored (EHR) data. In addition, they had to get FSL stored information throughout the follow-up phase (3, 6, and 12 months). SESCO researchers were responsible for coordinating the project, and supervising data collection, monitoring quality assurance and data validation, analyses and reporting.

Spanish autonomous communities that were interested designated the hospitals they wished to take part in the study. Thirteen public hospitals were included between January 2019 and May 2020, distributed by eight Spanish autonomous communities.

### Patient and public involvement

There was no patient or public involvement in the design of this study. Clinical researchers from participant hospitals were in charge of recruiting patients, informing and training both patients and caregivers and collecting self-reported and electronic health record stored (EHR) data. In addition, they had to get FSL stored information throughout the follow-up phase (3, 6, and 12 months). The results of the study will be disseminated among the clinical investigators of the participating hospitals.

### Outcomes

#### Effectiveness

The primary outcome was the change in HbA1c level from baseline to follow up. Secondary outcomes included: 1) data extracted from the EHR at baseline and 3, 6 and 12 months: number of severe hypoglycaemia events (defined as those that require help from another person), ketoacidosis episodes, number of hospital admissions, and mortality; and 2) self-reported outcomes evaluated at baseline and at 12 months follow-up, by means of the EQ-5D-Y questionnaire [19]; with five categories, reporting the level of severity, ranging from 1 ("I have no problems") to 5 ("I have a lot of problems") in terms of mobility, self-care, activities of daily living, pain/discomfort and anxiety/depression. Furthermore, a visual analogue scale (VAS) measured self-perceived general health, ranging from "0" (worst health status) to "100" (best health status).

Knowledge about diabetes treatment was measured by means of a modified version of the questionnaire devised by Mitchell et al. [20]. It includes 14 items evaluating basic theoretical knowledge about the management of

1  
2  
3  
4 T1DM and its treatment, as well as the patient/caregiver's self-perceived involvement in self-care. The final score  
5 is the sum of correct answers (range 0-14). To measure satisfaction with treatment, we used the six-item  
6 Diabetes Treatment Satisfaction Questionnaire (DTSQ) [21]. Response options range from 0 (very dissatisfied) to  
7 6 (very satisfied) (range 0-36). Another two items measured the perceived frequency of hyperglycaemia and  
8 hypoglycaemia on a scale from 0 (never perceived) to 6 (most of the time).  
9

### 10 11 **Safety**

12 Patients' self-reported device-related adverse events were collected at 3, 6 and 12-months of follow-up.  
13

### 14 15 **Adherence**

16 To measure device adherence, the following variables were evaluated: 1) Number of daily scans; 2) Sensor usage  
17 time; and 3) Number of sensors used. These data were collected throughout the follow-up phase by means of  
18 the information stored in the device.  
19

### 20 21 **Use of healthcare resources**

22 Data were extracted from EHR at baseline and at 12-months of follow-up on: 1) Number of hospitalizations; 2)  
23 Number of clinic visits (endocrinology, nursing, primary care/paediatrics, emergency); 3) Number of HbA1c  
24 assays; 4) Number of test strips and lancets used; and 5) Absenteeism from work (number of days the caregiver  
25 was absent from work due to problems related to the child's T1DM).  
26

27 In addition to these measures, information on age, sex, body mass index (BMI), time since diagnosis, presence  
28 of comorbidities and pubertal stage according to the Tanner scale [22], which classifies patients into 5 stages  
29 ranging from stage 1 (childhood) to 5 (adult), was systematically collected.  
30

### 31 32 **Sample Size Calculation**

33 We estimated a sample size requirement of 43 participants to detect a minimal clinically relevant change in  
34 HbA1c of 0.5% [23], assuming 95% confidence level, 80% power, a HbA1c standard deviation of 1, a pre-post  
35 correlation of 0.5 (conservative assumption), and a loss rate of 20%. In addition to the main effect in the whole  
36 sample, we were also interested in the effect of the intervention on subgroups defined by their baseline HbA1c  
37 level (greater or less than 7.5%), and age (<12 vs. ≥12 years-old). However, the analysis of interactions requires  
38 larger sample sizes to attain statistical power, which was not feasible within the study's time limits. Therefore,  
39 we aimed to multiply the sample at least by 4 (n=172) to increase the statistical power as much as possible.  
40

### 41 42 **Statistical analysis**

43 Means and standard deviation (SD) were estimated for continuous variables, and count and percentage for  
44 qualitative variables. Baseline characteristics of patients were compared using student-*t*, Pearson chi-square,  
45 Fisher's exact test or Cochran Q, according to the type of variables.  
46

47 Mixed regression models with repeated measures were used, adjusting for the interaction between time and  
48 baseline HbA1c (dichotomous variable) and age group, time, and its main effects. The duration of the disease  
49 and the presence of comorbidities were included as covariates. A linear link function was used for continuous  
50 dependent variables, a logistic function for dichotomous dependent variables and a Poisson function for count  
51 dependent variables. In the models with significant interaction, mixed regression models were performed for  
52 each interaction subgroup.  
53

54 The relationship between adherence to the device and HbA1c reduction was analysed using two mixed linear  
55 regression models, whose independent variables were the percentage of time using sensor (12 months) and the  
56 number of monthly scans; basal HbA1c level was introduced as a covariable. Intercept was introduced as a  
57 random effect in all models.  
58  
59  
60



1  
2  
3  
4 For missing values during follow-up, multiple imputation by chained equations was performed using Stata version  
5 15.0. The imputation model can be found in **online supplemental Appendix 1**.

6 A statistical significance level of 0.05 was considered. Analyses were performed with statistical software Stata  
7 V.15.0 [24] and SPSS V.20.0 [25].  
8  
9

### 10 **Cost estimation**

11 Intervention costs were estimated from the Spanish National Health System (NHS) perspective, including only  
12 direct health care costs during the 12 months of the study. The healthcare resources collected in this study,  
13 together with the corresponding unit costs and their information sources, can be found in **online supplemental**  
14 **Appendix 2 Table A1**. Costs were expressed as 2021 euros (€). When necessary, we adjusted for the consumer  
15 price index (CPI), using the Spanish Office for National Statistics (INE) - INE's income conversion tool [26]. The  
16 sensor's unit costs (€43.27) were not included in our analysis because it was donated by Abbot. In this way, only  
17 the difference in costs before and after use of the device was analysed without taking its cost into account, since  
18 this depends on the manufacturing company's economic offer.  
19

20 Unit cost of test strips and lancets were estimated with the average costs of information provided by different  
21 regional health services of the Spanish NHS. Total costs were estimated multiplying the collected data on health  
22 resources used by their respective unit costs, and then added.  
23

24 Descriptive statistics are presented for total costs aggregated and broken down into: primary care visits (nursing  
25 and physicians), emergency visits (hospital and non-hospitals), specialist physicians visits, laboratory tests (HbA1c  
26 assay) and monitoring instruments (test strips and lancets).  
27

28 Given the nature of the costs and their non-normality nature, confidence intervals were estimated using a non-  
29 parametric bootstrapping method [27]. Analyses were performed using the statistical software SPSS V.20.0 [25]  
30 with the help of Microsoft Excel.

31 In addition, although the social perspective was not taken into account in this estimate, indirect costs of  
32 technology were reported using the human capital theory, i.e. considering the costs attributed to productivity  
33 losses of the parents or caregivers of the child with T1DM before and after one year of using the FSL.

34 To estimate the cost per day of absenteeism, the cost per hour worked in Spain published by the Statistical Office  
35 of the European Union (Eurostat) [28] was multiplied by the average number of daily working hours worked in  
36 Spain published in the INE's Labour Force Survey (LFS) [29].  
37  
38  
39  
40  
41  
42  
43  
44  
45  
46  
47  
48  
49  
50  
51  
52  
53  
54  
55  
56  
57  
58  
59  
60

## Results

A total of 165 patients were registered. However, nine were excluded (flow-chart in **Figure 1**). For the analyses, a total of 156 patients were included.

### Figure 1. Flow-chart

Patients' baseline characteristics, are shown in **Table 1**, according to subgroups by level of metabolic control and age. There was a higher percentage of participants in stage 1 and 5 in the subgroup with worse glycaemic control ( $P=0.02$ ). In this subgroup the mean HbA1c value was 8.7%; with 6.8% ( $P<0.001$ ) in the well-controlled group. Descriptive statistics obtained at each time point for the total sample and subgroups for each of the outcome measures can be found in **online supplemental Appendix 3**.

| Table 1. Baseline characteristics of patients according to baseline HbA1c control and age groups                                                                                                                                                                                                                                                                                                                                                                                                                                                         |                  |                       |                        |              |                     |                      |                  |
|----------------------------------------------------------------------------------------------------------------------------------------------------------------------------------------------------------------------------------------------------------------------------------------------------------------------------------------------------------------------------------------------------------------------------------------------------------------------------------------------------------------------------------------------------------|------------------|-----------------------|------------------------|--------------|---------------------|----------------------|------------------|
|                                                                                                                                                                                                                                                                                                                                                                                                                                                                                                                                                          | Total<br>(n=156) | HbA1c <7.5%<br>(n=68) | HbA1c ≥7.5 %<br>(n=88) | p            | <12 years<br>(n=53) | ≥12 years<br>(n=103) | p                |
| <b>Anthropometric characteristics</b>                                                                                                                                                                                                                                                                                                                                                                                                                                                                                                                    |                  |                       |                        |              |                     |                      |                  |
| Sex (male) n (%)                                                                                                                                                                                                                                                                                                                                                                                                                                                                                                                                         | 86 (55.1)        | 35 (51.5)             | 51 (58)                | 0.419        | 28 (52.8)           | 58 (56.3)            | 0.679            |
| Age (years), mean (SD)                                                                                                                                                                                                                                                                                                                                                                                                                                                                                                                                   | 12.6 (3.2)       | 12.7 (2.84)           | 12.49 (3.39)           | 0.735        | 8.92 (2.09)         | 14.44 (1.58)         | <0.001           |
| Children < 12 years, n (%)                                                                                                                                                                                                                                                                                                                                                                                                                                                                                                                               | 53 (34)          | 21 (30.9)             | 32 (36.4)              | 0.474        | -                   | -                    | -                |
| BMI (kg/m <sup>2</sup> ), mean (SD)                                                                                                                                                                                                                                                                                                                                                                                                                                                                                                                      | 20.3 (4.1)       | 20.18 (3.34)          | 20.39 (4.54)           | 0.754        | 17.81 (3.29)        | 21.57 (3.82)         | <0.001           |
| <b>Pubertal status, n (%)</b>                                                                                                                                                                                                                                                                                                                                                                                                                                                                                                                            |                  |                       |                        | <b>0.022</b> |                     |                      | <b>&lt;0.001</b> |
| I                                                                                                                                                                                                                                                                                                                                                                                                                                                                                                                                                        | 51 (32.7)        | 19 (27.9)             | 32 (36.4)              |              | 44 (83)             | 7 (6.8)              |                  |
| II                                                                                                                                                                                                                                                                                                                                                                                                                                                                                                                                                       | 14 (9.0)         | 9 (13.2)              | 5 (5.7)                |              | 4 (7.5)             | 10 (9.7)             |                  |
| III                                                                                                                                                                                                                                                                                                                                                                                                                                                                                                                                                      | 20 (12.8)        | 7 (10.3)              | 13 (14.8)              |              | 4 (7.5)             | 16 (15.5)            |                  |
| IV                                                                                                                                                                                                                                                                                                                                                                                                                                                                                                                                                       | 23 (14.7)        | 16 (23.5)             | 7 (8)                  |              | 0 (0)               | 23 (22.3)            |                  |
| V                                                                                                                                                                                                                                                                                                                                                                                                                                                                                                                                                        | 48 (30.8)        | 17 (25)               | 31 (35.2)              |              | 1 (1.9)             | 47 (45.6)            |                  |
| <b>Clinical characteristics</b>                                                                                                                                                                                                                                                                                                                                                                                                                                                                                                                          |                  |                       |                        |              |                     |                      |                  |
| Duration of diabetes (years), mean (SD)                                                                                                                                                                                                                                                                                                                                                                                                                                                                                                                  | 5.65 (3.39)      | 5.52 (3.35)           | 5.75 (3.44)            | 0.671        | 4.06 (2.4)          | 6.47 (3.54)          | <0.001           |
| HbA1c, mean (SD)                                                                                                                                                                                                                                                                                                                                                                                                                                                                                                                                         | 7.86 (1.36)      | 6.82 (0.36)           | 8.65 (1.31)            | <0.001       | 7.83 (1.17)         | 7.87 (1.45)          | 0.87             |
| HbA1c <7.5%, n (%)                                                                                                                                                                                                                                                                                                                                                                                                                                                                                                                                       | 68 (43.6)        | -                     | -                      |              | 21 (39.6)           | 47 (45.6)            | 0.474            |
| Presence of comorbidities, n (%)                                                                                                                                                                                                                                                                                                                                                                                                                                                                                                                         | 50 (32.1)        | 27 (39.7)             | 23 (26.1)              | 0.072        | 17 (32.1)           | 33 (32)              | 0.996            |
| <b>Comorbidities, n (%)</b>                                                                                                                                                                                                                                                                                                                                                                                                                                                                                                                              |                  |                       |                        |              |                     |                      |                  |
| Asthma                                                                                                                                                                                                                                                                                                                                                                                                                                                                                                                                                   | 6 (3.8)          | 5 (7.4)               | 1 (1.1)                | 0.199        | 1 (1.9)             | 5 (4.9)              | 0.65             |
| Celiac Disease                                                                                                                                                                                                                                                                                                                                                                                                                                                                                                                                           | 8 (5.1)          | 6 (8.8)               | 2 (2.3)                | 0.261        | 5 (9.4)             | 3 (2.9)              | 0.102            |
| Thyroiditis                                                                                                                                                                                                                                                                                                                                                                                                                                                                                                                                              | 18 (11.5)        | 12 (17.6)             | 6 (6.8)                | 0.178        | 6 (11.3)            | 12 (11.7)            | 0.941            |
| ADHD                                                                                                                                                                                                                                                                                                                                                                                                                                                                                                                                                     | 4 (2.6)          | 1 (1.5)               | 3 (3.4)                | 0.322        | 1 (1.9)             | 3 (2.9)              | 0.999            |
| Others                                                                                                                                                                                                                                                                                                                                                                                                                                                                                                                                                   | 19 (12.2)        | 7 (10.3)              | 12 (13.6)              | 0.057        | 5 (9.4)             | 14 (13.6)            | 0.369            |
| SD = Standard deviation; HbA1c = Glycated haemoglobin; BMI = Body mass index; ADHD = Attention-Deficit/Hyperactivity Disorder. Other comorbidities: allergy, obesity, iron deficiency anemia, unilateral anorchia, immunoglobulin A (IgA) deficiency, intellectual disability, epilepsy, hypercholesterolemia, sensorineural hearing loss, migraines, idiopathic hypercalciuria, ovarian teratoma, nephrocalcinosis, psoriasis, allergic rhinitis, vasovagal syncope, syndrome Tourette's, eating disorder (ED) and obsessive-compulsive disorder (OCD). |                  |                       |                        |              |                     |                      |                  |

## Effectiveness

### Glycated haemoglobin

The interaction between time and baseline HbA1c group was statistically significant at 3, 6 and 12 months ( $P<0.001$ ) (Table 2). In the subgroup analysis, participants with baseline HbA1c<7.5% revealed an increase of 0.32% in HbA1c at 12 months (with respect to baseline) ( $P<0.001$ ), without exceeding, on average, the threshold of poor control. Patients with poorly controlled baseline status had a statistically significant reduction in HbA1c at all follow-ups: B=-0.46% ( $P<0.001$ ), B=-0.49% ( $P<0.001$ ), and B=-0.43% ( $P=0.001$ ), at 3, 6 and 12 months, respectively (Table 2). On average, this reduction did not attain the threshold of poor control.

| Variable                                                 | Glycosylated haemoglobin |                  |                         |                  |                         |                  |
|----------------------------------------------------------|--------------------------|------------------|-------------------------|------------------|-------------------------|------------------|
|                                                          | Total sample             |                  | HbA1c <7.5%             |                  | HbA1c ≥7.5%             |                  |
|                                                          | B<br>(95%CI)             | p                | B<br>(95%CI)            | p                | B<br>(95%CI)            | p                |
| <b>Time</b>                                              |                          |                  |                         |                  |                         |                  |
| M3 (ref: M0)                                             | 0.03<br>(-0.18; 0.24)    | 0.765            | 0.03<br>(-0.09; 0.16)   | 0.611            | -0.46<br>(-0.69; -0.23) | <b>&lt;0.001</b> |
| M6 (ref: M0)                                             | 0.1<br>(-0.11; 0.32)     | 0.344            | 0.10<br>(-0.03; 0.23)   | 0.115            | -0.49<br>(-0.73; -0.25) | <b>&lt;0.001</b> |
| M12 (ref: M0)                                            | 0.32<br>(0.10; 0.55)     | <b>0.005</b>     | 0.32<br>(0.18; 0.47)    | <b>&lt;0.001</b> | -0.43<br>(-0.68; -0.19) | <b>0.001</b>     |
| <b>Duration of T1DM</b>                                  | 0.05<br>(0.007; 0.09)    | <b>0.020</b>     | -0.005<br>(-0.04; 0.03) | 0.762            | 0.09<br>(0.02; 0.15)    | <b>0.011</b>     |
| <b>Presence of comorbidities</b>                         | -0.10<br>(-0.39; 0.18)   | 0.477            | 0.09<br>(-0.13; 0.30)   | 0.439            | -0.22<br>(-0.70; 0.26)  | 0.372            |
| <b>Age group: ≥12 years</b> (ref: <12 years)             | 0.17<br>(-0.12; 0.47)    | 0.253            | 0.09<br>(-0.15; 0.32)   | 0.473            | 0.26<br>(-0.21; 0.73)   | 0.274            |
| <b>Baseline HbA1c group: ≥7.5%</b> (ref: HbA1c <7.5%)    | 1.81<br>(1.50; 2.13)     | <b>&lt;0.001</b> |                         |                  |                         |                  |
| <b>Time*Baseline HbA1c Group</b> (ref: M0 & HbA1c <7.5%) |                          |                  |                         |                  |                         |                  |
| M3 & HbA1c ≥7.5%                                         | -0.49<br>(-0.78; -0.21)  | <b>&lt;0.001</b> |                         |                  |                         |                  |
| M6 & HbA1c ≥7.5%                                         | -0.59<br>(-0.88; -0.29)  | <b>&lt;0.001</b> |                         |                  |                         |                  |
| M12 & HbA1c ≥7.5%                                        | -0.76<br>(-1.05; -0.46)  | <b>&lt;0.001</b> |                         |                  |                         |                  |
| <b>Intercept</b>                                         | 6.75<br>(6.41; 7.09)     | <b>&lt;0.001</b> | 6.73<br>(6.50; 6.96)    | <b>&lt;0.001</b> | 8.53<br>(8.12; 8.94)    | <b>&lt;0.001</b> |

CI = Confidence Interval; HbA1c = Glycosylated Haemoglobin; M = Month; T1DM = Type 1 Diabetes Mellitus.

### Severe hypoglycaemic (SH) events

The reduction in the number of self-reported events was significant at 12 months ( $\beta=-0.37$ ;  $P=0.004$ ) (Table 3). Although the interaction with the level of HbA1c at baseline was not statistically significant ( $P=0.117$ ), the descriptive statistics (online supplemental Appendix 3) in patients with controlled HbA1c at baseline show a reduction in the mean number of events; with an increase in the poorly controlled subgroup.

SH events recorded in the EHR show significantly lower rates compared to self-reported events (online supplemental Appendix 3), without significant main or interaction effects (Table 3). The rate of SH events was significantly higher in the subgroup with poor HbA1c control ( $P=0.014$ ) (Table 3).

**Table 3. Multivariate mixed regression model for effectiveness measures**

| Variable                                                        | Self-reported severe hypoglycaemia events          |      |                                             |             | Severe hypoglycemic events in the clinical history |                 |                                             |                 | Visual analogue scale (EQ-5D-Y) |                 |                      |                 |                      |                 | Knowledge about DM1  |                 | Diabetes Treatment Satisfaction Questionnaire |                 |                                     |                 |                                          |                 |  |
|-----------------------------------------------------------------|----------------------------------------------------|------|---------------------------------------------|-------------|----------------------------------------------------|-----------------|---------------------------------------------|-----------------|---------------------------------|-----------------|----------------------|-----------------|----------------------|-----------------|----------------------|-----------------|-----------------------------------------------|-----------------|-------------------------------------|-----------------|------------------------------------------|-----------------|--|
|                                                                 | Patients with hypoglycemia (Yes / No) Total sample |      | Number of self-reported events Total sample |             | Patients with hypoglycemia (Yes / No) Total sample |                 | Number of self-reported events Total sample |                 | Total sample                    |                 | HbA1c <7.5%          |                 | HbA1c ≥7.5%          |                 | Total sample         |                 | Perceived hyperglycemia Total sample          |                 | Perceived hypoglycemia Total sample |                 | Satisfaction with treatment Total sample |                 |  |
|                                                                 | OR (95%CI)                                         | p    | β (95%CI)                                   | p           | OR (95%CI)                                         | p               | β (95%CI)                                   | p               | B (95%CI)                       | p               | B (95%CI)            | p               | B (95%CI)            | p               | B (95%CI)            | p               | B (95%CI)                                     | p               | B (95%CI)                           | p               | B (95%CI)                                | p               |  |
| <b>Time</b>                                                     |                                                    |      |                                             |             |                                                    |                 |                                             |                 |                                 |                 |                      |                 |                      |                 |                      |                 |                                               |                 |                                     |                 |                                          |                 |  |
| M12 (ref: M0)                                                   | 0.82 (0.35; 1.96)                                  | .659 | -0.37 (-0.62; -0.11)                        | <b>.004</b> | 1.47 (0.32; 6.77)                                  | .617            | 0.77 (-0.06; 1.60)                          | .069            | -1.40 (-4.97; 2.16)             | .440            | -1.33 (-4.17; 1.51)  | .359            | -6.03 (-9.66; -2.41) | <b>.001</b>     | 0.45 (-0.17; 1.08)   | .154            | -0.08 (-0.50; 0.34)                           | .721            | -0.23 (-0.70; 0.24)                 | .331            | 3.11 (0.99; 5.23)                        | <b>.004</b>     |  |
| <b>Duration of T1DM</b>                                         | 1.01 (0.89; 1.15)                                  | .850 | -0.01 (-0.14; 0.12)                         | .922        | 0.97 (0.81; 1.18)                                  | .806            | -0.05 (-0.24; 0.14)                         | .587            | -0.74 (-1.29; -0.19)            | <b>.008</b>     | -0.32 (-0.99; 0.35)  | .348            | -1.05 (-1.86; -0.24) | <b>.011</b>     | 0.01 (-0.08; 0.09)   | .851            | -0.003 (-0.06; 0.05)                          | .915            | -0.005 (-0.07; 0.06)                | .870            | 0.05 (-0.18; 0.29)                       | .650            |  |
| <b>Presence of comorbidities</b>                                | 0.81 (0.33; 1.98)                                  | .641 | 0.26 (-0.60; 1.12)                          | .556        | 0.81 (0.26; 2.50)                                  | .710            | 0.27 (-0.83; 1.38)                          | .624            | 0.87 (-2.91; 4.64)              | .652            | 2.42 (-1.78; 6.63)   | .259            | -1.04 (-6.98; 4.89)  | .731            | 0.02 (-0.52; 0.57)   | .930            | -0.005 (-0.43; 0.42)                          | .980            | 0.02 (-0.36; 0.41)                  | .91             | -0.52 (-2.15; 1.11)                      | .534            |  |
| <b>Age group: ≥12 years (ref: &lt;12 years)</b>                 | 0.56 (0.22; 1.42)                                  | .221 | -0.15 (-1.04; 0.75)                         | .745        | 1.32 (0.39; 4.44)                                  | .651            | 0.32 (-0.87; 1.50)                          | .599            | -3.11 (-6.99; 0.78)             | .117            | -3.84 (-8.61; 0.94)  | .115            | -2.82 (-8.49; 2.83)  | .327            | -0.09 (-0.67; 0.48)  | .705            | -0.05 (0.48; 0.38)                            | .819            | -0.002 (-0.38; 0.37)                | .99             | -0.02 (-3.24; 0.76)                      | .980            |  |
| <b>Baseline HbA1c group: ≥7.5% (ref: HbA1c &lt;7.5%)</b>        | 0.41 (0.15; 1.17)                                  | .097 | -0.57 (-1.40; 0.26)                         | .176        | 2.17 (0.53; 8.88)                                  | .280            | 1.54 (0.31; 2.77)                           | <b>.014</b>     | -1.93 (-5.98; 2.11)             | .349            |                      |                 |                      |                 | -1.27 (-1.89; 0.65)  | <b>&lt;.001</b> | 1.06 (0.60; 1.52)                             | <b>&lt;.001</b> | -0.12 (-0.57; 0.33)                 | .593            | -1.24 (-1.34; 4.22)                      | .225            |  |
| <b>Time*Baseline HbA1c Group (ref: M0 &amp; HbA1c &lt;7.5%)</b> |                                                    |      |                                             |             |                                                    |                 |                                             |                 |                                 |                 |                      |                 |                      |                 |                      |                 |                                               |                 |                                     |                 |                                          |                 |  |
| M12 & HbA1c ≥7.5%                                               | 2.69 (0.81; 8.96)                                  | .108 | 0.30 (-0.08; 0.68)                          | .117        | 2.01 (0.34; 11.68)                                 | .437            | -0.44 (-1.33; 0.45)                         | .333            | -4.61 (-9.44; 0.21)             | <b>.061</b>     |                      |                 |                      |                 | -0.06 (-0.90; 0.78)  | .892            | -0.11 (-0.70; 0.48)                           | .703            | 0.16 (-0.46; 0.78)                  | .615            | 1.44 (-1.34; 4.22)                       | .310            |  |
| <b>Intercept</b>                                                | 0.78 (0.27; 2.23)                                  | .641 | -0.78 (-1.74; 0.17)                         | .107        | 0.03 (0.004; 0.19)                                 | <b>&lt;.001</b> | -4.32 (-5.97; -2.67)                        | <b>&lt;.001</b> | 90.50 (86.13; 94.87)            | <b>&lt;.001</b> | 90.44 (85.92; 94.96) | <b>&lt;.001</b> | 88.92 (83.96; 93.88) | <b>&lt;.001</b> | 12.43 (11.78; 13.07) | <b>&lt;.001</b> | 2.98 (2.49; 3.46)                             | <b>&lt;.001</b> | 2.29 (1.84; 2.74)                   | <b>&lt;.001</b> | 26.80 (24.80; 28.81)                     | <b>&lt;.001</b> |  |

CI = Confidence Interval; HbA1c = Glycosylated Haemoglobin; M = Months; OR = Odds Ratio; ref = reference.

### Diabetic ketoacidosis and other serious adverse events

In the follow-up phase, six events of mild or moderate ketoacidosis were recorded at three (2), six (1), and 12 months (3), respectively; and four serious adverse events at three months (two admissions and one episode of ketosis without acidosis due to bubbles in the system); and at six months (one admission). No events were observed at 12-month follow-up. No patient died during follow-up.

### Health-related quality of life

At 12 months of follow-up, the percentages of severe limitations for mobility, self-care, daily activities, anxiety and depression were similar to baseline values. However, a reduction was observed in the percentage of patients who self-reported pain (**online supplemental Appendix 3**).

VAS score (**Table 3**) in poorly controlled patients was significantly reduced at 12 months compared to the baseline score ( $B=-6.03$ ;  $P=0.001$ ). In the subgroup with good basal metabolic control, no statistically significant findings were observed.

### Knowledge about T1DM

Patients with worse basal metabolic control showed a significantly lower score for disease-related knowledge ( $B=-1.27$ ;  $P<0.001$ ) (**Table 3**).

### Satisfaction with treatment

General satisfaction with treatment significantly increased 3.1 points at 12 months of follow-up ( $P=0.004$ ) (**Table 5**). There were no statistically significant differences in self-perceived hypo- and hyperglycaemia. For the latter, a higher score of 1.06 points (in a range of 0 to 6) was observed, in patients with  $HbA_{1c} \geq 7.5\%$ , compared to those with good control ( $P<0.001$ ) (**Table 3**).

### Safety

Mild adverse events related to the device during the follow-up phases had a 3.1% and 6.6% reduction for skin reactions and discomfort or pain, respectively, although these were not statistically significant (**Table 4**).

**Table 4. Mild adverse effects caused by the sensor**

|                           | 3 months<br>(n=150) | 6 months<br>(n=136) | 12 months<br>(n=128) | p    | Differences 12–3 months, %<br>(95%CI) |
|---------------------------|---------------------|---------------------|----------------------|------|---------------------------------------|
| Skin reactions, n (%)     | 21 (14.0)           | 16 (11.8)           | 14 (1.9)             | .542 | -3.1% (-25.2; 19.0)                   |
| Discomfort or pain, n (%) | 17 (11.3)           | 13 (9.6)            | 6 (4.7)              | .210 | -6.6% (-29.3; 16.1)                   |
| Other minor events, n (%) | 3 (2.0)             | 2 (1.5)             | 2 (1.6)              | .999 | -0.4% (-23.9; 23.1)                   |

Among the other events, there were minor haemorrhages when the sensor was placed and wounds in the insertion area. In one case, the bleeding caused the patient to lose consciousness.  
CI = Confidence Interval.

### Adherence

Time of sensor use (**Table 5**) significantly increased at 6.4% at 12 months of follow-up ( $P=0.02$ ), compared to three months. Longer duration of T1DM ( $P=0.008$ ), and being older than 12 years ( $P=0.003$ ), significantly reduced sensor use.

A reduction in the mean number of daily scans at three months occurred in poorly controlled patients ( $P=0.019$ ). Those over 12 years of age underwent an average of four fewer scans than those under 12 years of age ( $P<0.001$ ) (**Table 5**).

Controlled patients had an increase in the mean number of sensors use at 12 months of follow-up ( $B=7$ ;  $P<0.001$ ); also increasing in poorly controlled patients by 1.6 ( $P=0.005$ ), and 9.4 ( $P<0.001$ ) at 6 and 12 months, respectively (Table 5).

The percentage of time of use was statistically significantly related to a lower HbA1c level at 12 months ( $B=-0.01$ ;  $p=0.013$ ), as was the scans number ( $B=-0.21$ ;  $P<0.001$ ).

| Variable                                                 | Sensor usage time, %     |       | Number of scans per day |       | Number of sensors used |       |                        |       |                        |       |
|----------------------------------------------------------|--------------------------|-------|-------------------------|-------|------------------------|-------|------------------------|-------|------------------------|-------|
|                                                          | Total sample             |       | Total sample            |       | Total sample           |       | HbA1c basal < 7.5%     |       | HbA1c basal ≥ 7.5%     |       |
|                                                          | B (95%CI)                | p     | B (95%CI)               | p     | B (95%CI)              | p     | B (95%CI)              | p     | B (95%CI)              | p     |
| <b>Time</b>                                              |                          |       |                         |       |                        |       |                        |       |                        |       |
| M6 (ref: M3)                                             | 1.82<br>(-3.31; 6.98)    | .487  | -0.25<br>(-1.41; 0.92)  | .678  | 0.49<br>(-0.58; 1.56)  | .367  | 0.51<br>(-0.37; 1.39)  | .255  | 1.59<br>(0.48; 2.70)   | .005  |
| M12 (ref: M3)                                            | 6.42<br>(1.12; 11.72)    | .018  | 0.30<br>(-0.91; 1.51)   | .625  | 6.96<br>(5.85; 8.06)   | <.001 | 6.97<br>(6.06; 7.87)   | <.001 | 9.37<br>(8.25; 10.50)  | <.001 |
| <b>Duration of T1DM</b>                                  | -1.02<br>(-1.77; -0.27)  | .008  | -0.08<br>(-0.29; 0.13)  | .468  | -0.06<br>(-0.20; 0.07) | .363  | -0.11<br>(-0.25; 0.04) | .152  | -0.03<br>(-0.24; 0.18) | .804  |
| <b>Presence of comorbidities</b>                         | 0.53<br>(-4.61; 5.66)    | .840  | -0.69<br>(-2.14; 0.75)  | .348  | -0.35<br>(-1.27; 0.56) | .453  | -0.25<br>(-1.16; 0.66) | .585  | -0.39<br>(-1.92; 1.14) | .617  |
| <b>Age group: ≥12 years</b> (ref: <12 years)             | -7.93<br>(-13.19; -2.66) | .003  | -3.92<br>(-5.40; -2.43) | <.001 | 0.39<br>(-0.55; 1.33)  | .417  | 0.03<br>(-0.98; 1.05)  | .952  | 0.69<br>(-0.77; 2.14)  | .354  |
| <b>Baseline HbA1c group: ≥7.5%</b> (ref: HbA1c <7.5%)    | -4.59<br>(-10.71; 1.53)  | .142  | -1.92<br>(-3.52; -0.31) | .019  | 0.12<br>(-1.04; 1.29)  | .836  |                        |       |                        |       |
| <b>Time*Baseline HbA1c Group</b> (ref: M3 & HbA1c <7.5%) |                          |       |                         |       |                        |       |                        |       |                        |       |
| M6 & HbA1c ≥7.5%                                         | 0.38<br>(-6.58; 7.33)    | .915  | 0.43<br>(-1.14; 2.01)   | .590  | 1.09<br>(-0.36; 2.54)  | .141  |                        |       |                        |       |
| M12 & HbA1c ≥7.5%                                        | -1.35<br>(-8.48; 5.77)   | .710  | 0.35<br>(-1.28; 1.97)   | .676  | 2.41<br>(0.93; 3.90)   | .001  |                        |       |                        |       |
| <b>Intercept</b>                                         | 89.10<br>(82.9; 95.3)    | <.001 | 13.0<br>(11.32; 14.68)  | <.001 | 6.19<br>(5.04; 7.33)   | <.001 | 6.39<br>(5.34; 7.44)   | <.001 | 6.13<br>(4.77; 7.49)   | <.001 |

CI = Confidence Interval; HbA1c = Glycosylated Haemoglobin; M = Months; ref = reference.

### Costs estimation

The estimated total annual costs per patient are shown in Table A2 (online supplemental Appendix 2). Intervention short-term costs from an NHS perspective reveal that specialist visits and test strips and lancets costs represent a significant part of the total costs (38% and 41%, respectively), with an average annual cost per patient of €415.48 and €447.25 for specialist visits and strips and lancets, respectively.

The total annual costs before and after use of the FSL system can be found in Figure A1 (online supplemental Appendix 2). All measured costs decreased after use of the device throughout 12 months follow-up, with the most striking difference in costs related to test strips and lancets use, an annual difference of €856.68 per patient. This information is outlined in Table A3 (online supplemental Appendix 2). The annual average number of test strips per patient decreased from 2686.02 strips per year before the use of the FSL, to 883.98 strips per year after its use. The difference in the annual average use of lancets per patient also reduced from 1366.41, before FSL use, to 615.94, after its use.

1  
2  
3  
4 Furthermore, a decrease in the total annual costs due to productivity losses of parents/caregivers of minor  
5 patients with T1DM was observed after the use of FSL (€545.67 versus €262.73) as shown in **Table A3 (online**  
6 **supplemental Appendix 2)**.  
7

## 8 **Discussion**

9  
10 Glucose monitoring devices may help people with T1DM control their glycaemia levels and reduce the  
11 frequency and/or severity of acute disease-complication rates, thus improving their HRQoL and life expectancy  
12 [30]. Two meta-analyses of case series on the effectiveness of the FSL yielded statistically significant HbA1c  
13 reductions in children/adolescents of -0.54% (n=447) [31] and -0.29% (n=959) [32], although with high statistical  
14 heterogeneity. Our study provides a statistically significant reduction of HbA1c only in the group with poor  
15 baseline control, (-0.46%, -0.49% and -0.35%), at 3, 6 and 12 months, respectively. Conspicuously, patients with  
16 basal controlled HbA1c levels revealed a significant 12-month worsening superior to 0.30%. Another case series  
17 in Spain (n=145) [33], with limited follow up to three months, also detected a reduction in patients with  
18 HbA1c $\geq$ 7.5% (-0.41,  $P=0.004$ ), and a statistically significant increase in well-controlled patients, i.e. a worsening  
19 in HbA1c levels (0.23,  $P=0.03$ ). Other studies [31, 34], reported a moderating effect of baseline HbA1c levels on  
20 subsequent reduction, with greater improvements in poorly controlled patients of all ages. However, except the  
21 aforementioned Spanish study [33], there are no known studies whose results indicate a significant worsening  
22 in well-controlled patients.  
23

24  
25 Our study also revealed a significant reduction in the number of self-reported SH events for the whole  
26 sample (-0.37), but not in the number of patients with at least one event. The interaction effect with baseline  
27 HbA1c level was not statistically significant for these two variables ( $P=0.117$  and  $P=0.108$ , respectively). However,  
28 these analyses were underpowered and the descriptive statistics suggest different subgroup effects, although  
29 none was statistically significant. The reduction of self-reported SH events occurred in patients with correct  
30 HbA1c control at baseline (0.39), whereas in the basally uncontrolled group, an increase was self-reported (0.37  
31 more); together with an important increase in the rate of patients with at least one event (from 26% to 38%).  
32 These results could be reflecting the trade-off faced by patients with T1DM between the reduction of glucose  
33 levels and the associated risk of increasing the risk of hypoglycaemic events. Patients with higher HbA1c levels  
34 could have attained the reduction target, increasing the risk of SH; whereas some of those patients in need of  
35 reducing hypoglycaemic events, could increase their HbA1c levels. This interpretation is speculative since the  
36 commented results on self-reported SH were not statistically significant and underpowered, but it would help  
37 account for the unexpected significant worsening in self-perceived general health observed in the subgroup of  
38 poor baseline HbA1c control. Contrary to the HbA1c improvement achieved in our study, without observable  
39 effects on self-perceived HRQoL, suffering an SH event is a salient experience that may influence this self-  
40 perception.  
41

42  
43 Other studies [33] have also reported a significant and clinically meaningful improvement in the rate of  
44 SH events (from 4.2 to 0.2 events/100 patients-year), but their results are not reported separately according to  
45 basal levels of metabolic control. The largest case series published to date with children and adolescents [35],  
46 and with the longest follow-up (12 months), also detected a statistically significant reduction of SH events (53%,  
47  $P=0.012$ ) for the whole sample, with no changes in HbA1c.  
48

49  
50 The interaction of the intervention with the age group (<12 vs.  $\geq$ 12 years-old) was not statistically  
51 significant in any case, but descriptive statistics show different non-significant trends among subgroups, with  
52 positive results only for younger participants: -0.26% vs. -0.05% (HbA1c), -1.06 vs. 0.68 (SH events) and -4.2% vs.  
53 10.5% (people with one or more SH). Adolescents revealed significantly lower sensor usage time and scans per  
54 day than children, similar to the results observed in previous studies [36-38]. Regardless of these findings, their  
55 adherence was good, above 78% of the time at each successive evaluation. However, the only randomized  
56 controlled trial to date evaluating the effectiveness of FSL in adolescents (aged 13-20 years, with HbA1c $\geq$ 9.0%)  
57  
58  
59  
60

1  
2  
3  
4 [39], found no statistically significant differences in HbA1c reduction compared to traditional self-monitoring at  
5 six months. Therefore, an important uncertainty remains in regard to the effects of FSL in adolescents.

6  
7 Despite the improvement in the degree of metabolic control that occurred in our study sample of  
8 patients with worse baseline HbA1c levels, no statistically significant improvement was observed in their  
9 knowledge of disease self-management. Device adherence was significantly related to the reduction of HbA1c, a  
10 result usually observed in the literature on glucose monitoring devices [36-38]. The same can be said about  
11 treatment satisfaction [40,41], which improved in the whole sample.

12  
13 In regard to safety, no serious adverse effects were observed, a result consistent with the literature on  
14 glucose monitoring devices in general [9]. The rate of patients showing mild adverse events at three months was  
15 reduced at the end of follow-up to 18%, resulting in two losses at six months follow-up due to skin reaction to  
16 the sensor and another two at 12 months due to discomfort with the sensor.

17  
18 With respect to costs analysis as observed in the international literature, our results showed that T1DM  
19 patients consume less healthcare resources using FSL [42]. Fundamentally, a striking decrease was observed in  
20 costs attributed to reactive strips and lancets, where an annual difference of €856.68 per patient is obtained. A  
21 decrease in the total indirect annual costs due to productivity losses of parents/carers of T1DM patients, was  
22 also observed (€545.67 versus €262.73).

23  
24 The main limitation of this study lies in its uncontrolled design, which precludes comparison with an  
25 untreated group. Another relevant limitation is the limited sample size to analyse interaction effects. To minimize  
26 this limitation, the research team increased the recruited sample fourfold.

27  
28 By the time of study execution, the FSL was already financed and introduced in some hospitals taking part  
29 and a large part of the target population was already using it. This scenario was an important recruitment  
30 obstacle to enlarge sample size. Our conclusions to be drawn are, therefore, limited by the low statistical power  
31 for interaction analyses and rare events such as severe hypoglycaemia. Moreover, the uncontrolled design of the  
32 study implies a low quality of evidence.

33  
34 Our cost analysis has not taken into account the costs attributable to the possible adverse effects arising  
35 from the use of FSL and it has assumed that the possible failures of the device will be resolved at no additional  
36 cost to the NHS. Moreover, it was not possible to estimate the costs related to hospitalization of the patients  
37 since the number of days of each hospitalization was not recorded in this study. However, the extremely low  
38 number of total hospitalizations during the monitoring study indicates that including this cost in the estimate  
39 would not have produced substantial changes in the results.

40  
41 To the best of our knowledge, this is the first comparative costs analysis study of FSL use in children and  
42 adolescents with T1DM in Spain using observational data in an actual use scenario. Therefore, although a cost-  
43 effectiveness analysis could not be performed in this study, due to the absence of a comparator, our results may  
44 contribute to inform future cost-effectiveness studies of FSL in Spain.

45  
46 In conclusion, our results suggest that the use of FSL in young T1DM patients significantly reduces the rate of SH  
47 events, and improves HbA1c levels in patients with poor baseline control. However, futures studies should  
48 confirm whether these benefits could be at the cost of worsening severe hypoglycaemia in patients with lower  
49 HbA1c. No serious adverse events related to FSL were observed. The results also suggest that the use of FSL in  
50 young patients with T1DM leads to a decrease in monitoring costs. In addition, the use of FSL reduces costs  
51 attributable to lost productivity of parents/caregivers.

52  
53 These outcomes correspond to low-quality evidence, mainly due to the study's uncontrolled design, in  
54 addition to the low statistical power in the case of rare complications such as SH.



## Footnotes

**Collaborators:** The Health Professional Group included the following members (alphabetical order): Amparo González Vergaz (Hospital Severo Ochoa), Ana María Prado Carro (Complejo Hospitalario Universitario A Coruña), Anunciación Beisti Ortego (Fundación Hospital Calahorra), Ariadna Campos Martorell (Hospital Universitari Vall D'hebron), Atilano José Carcavilla Urqui (Hospital Universitario La Paz), Cristina Amparo Del Castillo Villaescusa (Hospital Universitario Dr. Peset Aleixandre), Estela Gil Poch (Hospital Universitario de Badajoz), Francisco Javier Arroyo Diez (Hospital Universitario de Badajoz), Gemma Novoa Gómez (Complejo Hospitalario Universitario de Ourense), Isabel González Casado (Hospital Universitario La Paz), Juncal Martínez Ibáñez (Fundación Hospital Calahorra), Laura Cuadrado Piqueras (Fundación Hospital Calahorra), Leticia Reis Iglesias (Complejo Hospitalario Universitario de Ourense), Lucia Garzón Lorenzo (Hospital Universitario 12 De Octubre), Luis Salamanca Fresno (Hospital Universitario La Paz), María Asunción Martínez Brocca (Hospital Universitario Virgen Macarena), María Aurea Rodríguez Blanco (Hospital Da Barbanza), María Del Mar Martínez López (Hospital Universitario 12 De Octubre), María Jesús Ferreiro Rodríguez (Complejo Hospitalario Universitario de Ourense), María Ruiz del Campo (Hospital San Pedro), Nerea Itza Martín (Hospital Universitario La Paz), Patricia García Navas (Hospital San Pedro), Rebeca García García (Hospital Universitario Central de Asturias).

**Contributorship statement:** All authors 1) made substantial contributions to research design, analysis and interpretation of data; 2) drafted and critically reviewed the paper, and 3) approved the final version.

**Competing interests:** None declared.

**Funding:** This work was financed by the Spanish Ministry of Health, Consumption and Social Welfare in the framework of activities developed by the Spanish Network of Agencies for Health Technology Assessment for the Spanish National Health Service.

**Data sharing statement:** Data are not publicly available. Data are available upon reasonable request.

**Ethics approval statement**

**Patient consent for publication:** Not applicable.

**Ethics approval:** All participants provided written informed consent. The scientific and ethics committees approved the study protocol (Hospital Universitari Vall d'Hebron, ID-RTF065).

## References

1. Lucier J, Weinstock RS, Doerr C. Diabetes Mellitus Type 1 (Nursing). 2021 Jul 26. In: StatPearls [Internet]. Treasure Island (FL): StatPearls Publishing; 2022 Jan-. PMID: 33760510
2. Golden SH, Sapir T. Methods for insulin delivery and glucosa monitoring in diabetes: summary of a comparative effectiveness review. *J. Manag. care Pharm.* 2012;18(6):S1 17
3. Miranda Velasco MJ, Domínguez Martín E, Arroyo Díez FJ, Méndez Pérez P, González de Buitrago Amigo J. Calidad de vida relacionada con la salud en la diabetes mellitus tipo 1. *An. Pediatría.* 2012 Nov;77(5):329–33
4. International Diabetes Federation. IDF diabetes atlas. 8.aed.Bruselas, Bélgica; 2017.2
5. Conde Barreiro S, Rodríguez Rigual M, Bueno Lozano G, et al. Epidemiología de la diabetes mellitus tipo 1 en menores de 15 años en España. *An. Pediatría.* 2014;81(3):189.e1 189.e12
6. Crespo C, Brosa M, Soria-Juan A, Lopez-Alba A, López-Martínez N, Soria B. Costes directos de la diabetes mellitus y de sus complicaciones en España (Estudio SECCAID: Spain estimated cost Ciberdem-Cabimer in Diabetes). *Av. en Diabetol.* 2013 Nov;29(6):182–9
7. Klonoff DC, Ahn D, Drincic A. Continuous glucose monitoring: A review of the technology and clinical use. *Diabetes Res. Clin. Pract.* 2017;133:178 92
8. Marsters BL, Boucher SE, Galland BC, et al. Cutaneous adverse events in a randomized controlled trial of flash glucose monitoring among youth with type 1 diabetes mellitus. *Pediatr Diabetes.* 2020;21(8):1516-1524.
9. Landau, Z., Abiri, S., Gruber, N., Levy-Shraga, Y., Brenner, A., Lebenthal, Y., ... Rachmiel, M. (2018). Use of flash glucose-sensing technology (FreeStyle Libre) in youth with type 1 diabetes: AWESoMe study group real-life observational experience. *Acta Diabetologica.* doi:10.1007/s00592-018-1218-8
10. Abbott Diabetes Care. Manual de Usuario. FreeStyle Libre. Sistema Flash de Monitorización de Glucosa. Madrid: 2017
11. Al Hayek AA, Robert AA, Al Dawish MA. Evaluation of FreeStyle Libre Flash Glucose Monitoring System on Glycemic Control, Health-Related Quality of Life, and Fear of Hypoglycemia in Patients with Type 1 Diabetes. *Clin Med Insights Endocrinol Diabetes.* 2017 Dec 10;10:1179551417746957. doi: 10.1177/1179551417746957. PMID: 29270042; PMCID: PMC5731614.
12. Al Hayek AA, Robert AA, Al Dawish MA. Effectiveness of the Freestyle Libre Flash Glucose Monitoring System on Diabetes Distress Among Individuals with Type 1 Diabetes: A Prospective Study. *Diabetes Ther.* 2020 Apr;11(4):927-937. doi: 10.1007/s13300-020-00793-2. Epub 2020 Mar 7. PMID: 32146691; PMCID: PMC7136360.
13. Perestelo-Pérez L, Rivero-Santana A, García-Lorenzo B, Castilla-Rodríguez I, Vallejo-Torres L, García-Pérez L, et al. Efectividad, seguridad y coste-efectividad del sistema flash de monitorización de glucosa en líquido intersticial (FreeStyle Libre®) para la Diabetes Mellitus tipo 1 y 2. Ministerio de Sanidad, Servicios Sociales e Igualdad. Servicio de Evaluación del Servicio Canario de la Salud. Informes de Evaluación de Tecnologías Sanitarias; 2016
14. Perestelo-Pérez L, Rivero-Santana A, García-Lorenzo B, Castilla-Rodríguez I, Vallejo-Torres L, García-Pérez L, et al. Efectividad, seguridad y coste-efectividad del sistema flash de monitorización de glucosa en líquido intersticial (FreeStyle Libre®) para la Diabetes Mellitus tipo 1 y 2 (Apéndice de actualización). Ministerio de Sanidad, Servicios Sociales e Igualdad. Servicio de Evaluación del Servicio Canario de la Salud. Informes de Evaluación de Tecnologías Sanitarias; 2017

- 1
  - 2
  - 3
  - 4
  - 5
  - 6
  - 7
  - 8
  - 9
  - 10
  - 11
  - 12
  - 13
  - 14
  - 15
  - 16
  - 17
  - 18
  - 19
  - 20
  - 21
  - 22
  - 23
  - 24
  - 25
  - 26
  - 27
  - 28
  - 29
  - 30
  - 31
  - 32
  - 33
  - 34
  - 35
  - 36
  - 37
  - 38
  - 39
  - 40
  - 41
  - 42
  - 43
  - 44
  - 45
  - 46
  - 47
  - 48
  - 49
  - 50
  - 51
  - 52
  - 53
  - 54
  - 55
  - 56
  - 57
  - 58
  - 59
  - 60
15. Servicio de Evaluación del Servicio Canario de la Salud. (s.f.). <http://www.sescs.es/>
16. Serrano-Aguilar P, Asua-Batarrita J, Molina-López MT, et al. The Spanish Network of Agencies for Health Technology Assessment and Services of the National Health System (RedETS). *Int J Technol Assess Health Care*. 2019 Jan;35(3):176-180. doi: 10.1017/S0266462319000205. Epub 2019 Apr 22. PMID: 31006412.
17. García-Lorenzo B, Rivero-Santana A, Vallejo-Torres L, et al. Cost-effectiveness analysis of real-time continuous monitoring glucose compared to self-monitoring of blood glucose for diabetes mellitus in Spain. *J Eval Clin Pract*. 2018 Aug;24(4):772-781. doi: 10.1111/jep.12987. Epub 2018 Jul 3. PMID: 29971893.
18. Serrano-Aguilar P, Gutierrez-Ibarluzea I, Díaz P, Imaz-Iglesia I, González-Enríquez J, Castro JL, Espallargues M, et al. Postlaunch evidence-generation studies for medical devices in Spain: the RedETS approach to integrate real-world evidence into decision making. *Int J Technol Assess Health Care*. 2021 May 4;37(1):e63. doi: 10.1017/S0266462321000295. PMID: 33942712.
19. Wille N, Badia X, Bonsel G, et al. Development of the EQ-5D-Y: A child-friendly version of the EQ-5D. *Quality of Life Research*. 2010;19(6):875–886. 14. ref 20 informe final
20. Mitchell K, Johnson K, Cullen K, et al. Parental mastery of continuous subcutaneous insulin infusion skills and glycemic control in youth with type1 diabetes. *Diabetes Technol Ther*. 2013;15(7):591-595.
21. Bradley C. The Diabetes Treatment Satisfaction Questionnaire: DTSQ. In: Bradley C, editor. *Handbook of Psychology and Diabetes: a guide to psychological measurement in diabetes research and practice*. Chur, Switzerland: Harwood Academic Publishers. 1994. pp. 111–132
22. Tanner, J M. *Growth at Adolescence: With a General Consideration of the Effects of Hereditary and Environmental Factors Upon Growth and Maturation from Birth to Maturity*. Oxford: Blackwell Scientific Publications, 1962. Print.
23. Hayes AJ, Leal J, Gray AM, et al. UKPDS outcomes model 2: a new version of a model to simulate lifetime health outcomes of patients with type 2 diabetes mellitus using data from the 30 year United Kingdom Prospective Diabetes Study: UKPDS 82. *Diabetologia*. 2013;56(9):1925-1933.
24. StataCorp. *Stata statistical software: release 15*. College Station, TX: StataCorp LLC, 2017.
25. IBM Corp. Released 2011. *IBM SPSS Statistics for Windows, Version 20.0*. Armonk, NY: IBM Corp.
26. Instituto Nacional de Estadística (INE). Actualización de rentas con el IPC general (sistema IPC base 2016) para periodos anuales completos. Disponible en: <https://www.ine.es/calcula/>
27. Zhu W. Making bootstrap statistical inferences: a tutorial. *Res Q Exerc Sport*. 1997; 68:44-55.
28. Eurostat. Labour cost levels by NACE Rev. 2 activity. Disponible en: [https://ec.europa.eu/eurostat/databrowser/view/lc\\_lci\\_lev/default/table?lang=en](https://ec.europa.eu/eurostat/databrowser/view/lc_lci_lev/default/table?lang=en)
29. Instituto Nacional de Estadística (INE). Encuesta de Población Activa (EPA). Disponible en: [https://www.ine.es/dyngs/INEbase/es/operacion.htm?c=Estadistica\\_C&cid=1254736176918&menu=ultiDatos&idp=1254735976595](https://www.ine.es/dyngs/INEbase/es/operacion.htm?c=Estadistica_C&cid=1254736176918&menu=ultiDatos&idp=1254735976595)
30. Ang E, Lee ZX, Moore S, Nana M. Flash glucose monitoring (FGM): A clinical review on glycaemic outcomes and impact on quality of life. *J Diabetes Complications*. 2020 Jun;34(6):107559. doi: 10.1016/j.jdiacomp.2020.107559. Epub 2020 Feb 13. PMID: 32089428.
31. Evans M, Welsh Z, Ells S, et al. The Impact of Flash Glucose Monitoring on Glycaemic Control as Measured by HbA1c: A Meta-analysis of Clinical Trials and Real-World Observational Studies. *Diabetes Ther*. 2020;11(1):83-95.

- 1  
2  
3  
4 32. Gordon I, Rutherford C, Makarounas-Kirchmann K, et al. Meta-analysis of average change in laboratory-measured HbA1c among people with type 1 diabetes mellitus using the 14 day Flash Glucose Monitoring System. *Diabetes Res Clin Pract.* 2020;164:108158.  
5  
6  
7  
8 33. Leiva-Gea I, Garcia Vázquez J, Liñán Jurado FR, et al. Introduction of Flash Glucose Monitoring in Children with Type 1 Diabetes: Experience of a Single-Centre in Spain. *ESPE Abstracts (2019)* 92 LB-20  
9  
10  
11 34. Teo E, Hassan N, Tam W, Koh S. Effectiveness of continuous glucose monitoring in maintaining glycaemic control among people with type 1 diabetes mellitus: a systematic review of randomised controlled trials and meta-analysis. *Diabetologia.* 2022;65(4):604-619. doi:10.1007/s00125-021-05648-4  
12  
13  
14  
15 35. Messaaoui A, Tenoutasse S, Crenier L. Flash Glucose Monitoring Accepted in Daily Life of Children and Adolescents with Type 1 Diabetes and Reduction of Severe Hypoglycemia in Real-Life Use. *Diabetes Technol Ther.* 2019 Jun;21(6):329-335. doi: 10.1089/dia.2018.0339. Epub 2019 May 6. PMID: 31058545.  
16  
17  
18  
19 36. Urakami T, Yoshida K, Kuwabara R, et al. Frequent scanning using flash glucose monitoring contributes to better glycemic control in children and adolescents with type 1 diabetes. *J Diabetes Investig.* 2021.  
20  
21  
22  
23 37. Lameijer A, Lommerde N, Dunn TC, et al. Flash Glucose Monitoring in the Netherlands: Increased monitoring frequency is associated with improvement of glycemic parameters. *Diabetes Res Clin Pract.* 2021;177:108897.  
24  
25  
26 38. Battelino T, Liabat S, Veeze HJ, et al. Routine use of continuous glucose monitoring in 10 501 people with diabetes mellitus. *Diabet Med.* 2015;32(12):1568-74.  
27  
28  
29 39. Boucher SE, Gray AR, Wiltshire EJ, et al. Effect of 6 Months of Flash Glucose Monitoring in Youth With Type 1 Diabetes and High-Risk Glycemic Control: A Randomized Controlled Trial. *Diabetes Care.* 2020;43(10):2388-2395.  
30  
31  
32 40. Ang E, Lee ZX, Moore S, et al. Flash glucose monitoring (FGM): A clinical review on glycaemic outcomes and impact on quality of life. *J Diabetes Complications.* 2020;34(6):107559.  
33  
34  
35 41. Palylyk-Colwell E, Ford C. Flash Glucose Monitoring System for Diabetes. 2017 Jun 1. In: *CADTH Issues in Emerging Health Technologies.* Ottawa (ON): Canadian Agency for Drugs and Technologies in Health; 2016-. 158.  
36  
37  
38 42. Lin R, Brown F, James S, Jones J, Ekinci E. Continuous glucose monitoring: A review of the evidence in type 1 and 2 diabetes mellitus. *Diabet Med.* 2021 May;38(5):e14528. doi: 10.1111/dme.14528. Epub 2021 Mar 6. PMID: 33496979.  
39  
40  
41  
42  
43  
44  
45  
46  
47  
48  
49  
50  
51  
52  
53  
54  
55  
56  
57  
58  
59  
60

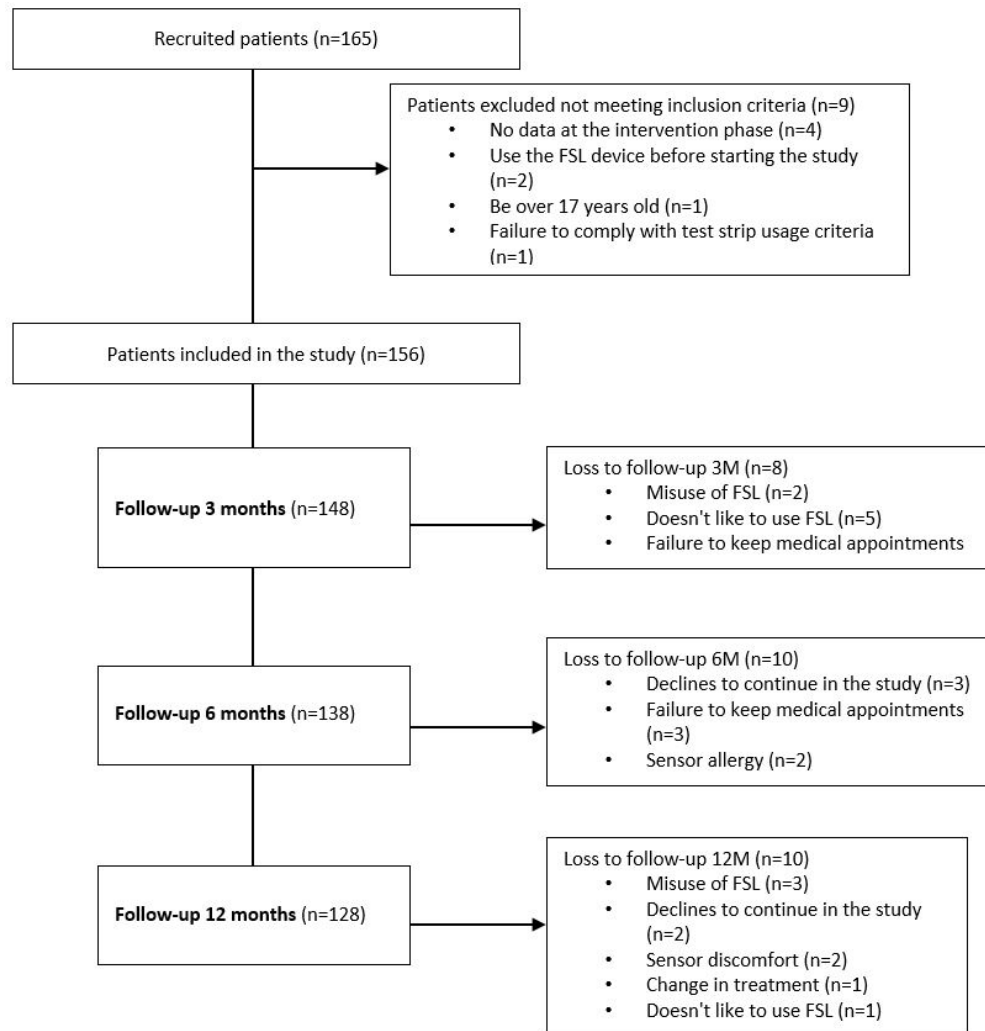

Figure 1. Flow-charts

214x223mm (96 x 96 DPI)

## Appendix 1. Description of the missing data imputation model

Multiple imputation was performed by chained equations using Stata 15.0 software. The variables sex, age, pubertal stage, presence of comorbidities and duration of diabetes were considered regular and used as predictors for imputation. A total of 29 variables were imputed. Each variable was imputed in chronological order: 3, 6 and 12 months. As a general rule, the latest available information on the variable to be imputed was used. When information from other variables was used, the information from the same point in time was used. A total of 10 imputations were made for each missing data.

| Order | Imputed variable                                       | Variables used in imputation                                                                                                                                                                                                       | Imputation model | n (%) missing |
|-------|--------------------------------------------------------|------------------------------------------------------------------------------------------------------------------------------------------------------------------------------------------------------------------------------------|------------------|---------------|
| 1     | HbA1c 3M                                               | Sex, Age, Pubertal stage, Presence of comorbidities, Time since diagnosis, HbA1c Baseline                                                                                                                                          | pmm              | 7 (4,5)       |
| 2     | HbA1c 6M                                               | Sex, Age, Pubertal stage, Presence of comorbidities, Time since diagnosis, HbA1c 3M                                                                                                                                                | pmm              | 20 (12,8)     |
| 3     | HbA1c 12M                                              | Sex, Age, Pubertal stage, Presence of comorbidities, Time since diagnosis, HbA1c 6M                                                                                                                                                | pmm              | 28 (17,9)     |
| 4     | BMI 6M                                                 | Sex, Age, Pubertal stage, Presence of comorbidities, Time since diagnosis, BMI Baseline                                                                                                                                            | pmm              | 24 (15,4)     |
| 5     | BMI 12M                                                | Sex, Age, Pubertal stage, Presence of comorbidities, Time since diagnosis, BMI 6M                                                                                                                                                  | pmm              | 28 (17,9)     |
| 6     | N. <sup>o</sup> severe hypoglycaemia events 3M         | Sex, Age, Pubertal stage, Presence of comorbidities, Time since diagnosis, N. <sup>o</sup> severe hypoglycaemia events Baseline                                                                                                    | poisson          | 7 (4,5)       |
| 7     | N. <sup>o</sup> severe hypoglycaemia events 6M         | Sex, Age, Pubertal stage, Presence of comorbidities, Time since diagnosis, N. <sup>o</sup> severe hypoglycaemia events 3M                                                                                                          | poisson          | 7 (4,5)       |
| 8     | N. <sup>o</sup> severe hypoglycaemia events 12M        | Sex, Age, Pubertal stage, Presence of comorbidities, Time since diagnosis, N. <sup>o</sup> severe hypoglycaemia events 6M                                                                                                          | poisson          | 7 (4,5)       |
| 9     | N. <sup>o</sup> severe hypoglycaemia events on EHR 3M  | Sex, Age, Pubertal stage, Presence of comorbidities, Time since diagnosis, N. <sup>o</sup> severe hypoglycaemia events 3M, N. <sup>o</sup> severe hypoglycaemia events on EHR Baseline                                             | poisson          | 8 (5,1)       |
| 10    | N. <sup>o</sup> severe hypoglycaemia events on EHR 6M  | Sex, Age, Pubertal stage, Presence of comorbidities, Time since diagnosis, N. <sup>o</sup> severe hypoglycaemia events 6M, N. <sup>o</sup> severe hypoglycaemia events on EHR 3M                                                   | poisson          | 28 (17,9)     |
| 11    | N. <sup>o</sup> severe hypoglycaemia events on EHR 12M | Sex, Age, Pubertal stage, Presence of comorbidities, Time since diagnosis, N. <sup>o</sup> severe hypoglycaemia events 12M, N. <sup>o</sup> severe hypoglycaemia events on EHR 6M                                                  | poisson          | 28 (17,9)     |
| 12    | VAS 12M                                                | Sex, Age, Pubertal stage, Presence of comorbidities, Time since diagnosis, Mobility EQ-5D-Y 12M, Self-care EQ-5D-Y 12M, Habitual activities EQ-5D-Y 12M, Pain/discomfort EQ-5D-Y 12M, Anxiety/depression EQ-5D-Y 12M, VAS Baseline | pmm              | 36 (23,1)     |
| 13    | Knowledge about Baseline                               | Sex, Age, Pubertal stage, Presence of comorbidities, Time since diagnosis, HbA1c Baseline, BMI Baseline                                                                                                                            | pmm              | 14 (9,0)      |
| 14    | Knowledge about 12M                                    | Sex, Age, Pubertal stage, Presence of comorbidities, Time since diagnosis, HbA1c 12M, BMI 12M, Knowledge about Baseline                                                                                                            | pmm              | 48 (30,8)     |
| 15    | Hyperglycaemia DTSQ Baseline                           | Sex, Age, Pubertal stage, Presence of comorbidities, Time since diagnosis, HbA1c Baseline, Knowledge about Baseline                                                                                                                | pmm              | 14 (9,0)      |
| 16    | Hyperglycaemia DTSQ 12M                                | Sex, Age, Pubertal stage, Presence of comorbidities, Time since diagnosis, HbA1c 12M, Knowledge about 12M, Hyperglycaemia DTSQ Baseline                                                                                            | pmm              | 48 (30,8)     |
| 17    | Hypoglycaemia DTSQ Baseline                            | Sex, Age, Pubertal stage, Presence of comorbidities, Time since diagnosis                                                                                                                                                          | pmm              | 14 (9,0)      |

|                                                                                                                                                                                                                                                                                                      |                                           |                                                                                                                                                                                                                                                                             |     |           |
|------------------------------------------------------------------------------------------------------------------------------------------------------------------------------------------------------------------------------------------------------------------------------------------------------|-------------------------------------------|-----------------------------------------------------------------------------------------------------------------------------------------------------------------------------------------------------------------------------------------------------------------------------|-----|-----------|
| 18                                                                                                                                                                                                                                                                                                   | Hypoglycaemia DTSQ 12M                    | Sex, Age, Pubertal stage, Presence of comorbidities, Time since diagnosis, Hypoglycaemia DTSQ Baseline                                                                                                                                                                      | pmm | 48 (30,8) |
| 19                                                                                                                                                                                                                                                                                                   | Satisfaction with treatment DTSQ Baseline | Sex, Age, Pubertal stage, Presence of comorbidities, Time since diagnosis, N. <sup>o</sup> severe hypoglycaemia events Baseline, N. <sup>o</sup> severe hypoglycaemia events on EHR Baseline, Knowledge about Baseline, Hyperglycaemia DTSQ Baseline,                       | pmm | 14 (9,0)  |
| 20                                                                                                                                                                                                                                                                                                   | Satisfaction with treatment DTSQ 12M      | Sex, Age, Pubertal stage, Presence of comorbidities, Time since diagnosis, N. <sup>o</sup> severe hypoglycaemia events 12M, N. <sup>o</sup> severe hypoglycaemia events on EHR 12M, Knowledge about 12M, Hyperglycaemia DTSQ 12M, Satisfaction with treatment DTSQ Baseline | pmm | 48 (30,8) |
| 21                                                                                                                                                                                                                                                                                                   | N. <sup>o</sup> of daily scans 3M         | Sex, Age, Pubertal stage, Presence of comorbidities, Time since diagnosis, HbA1c 3M, BMI Baseline, N. <sup>o</sup> severe hypoglycaemia events 3M                                                                                                                           | pmm | 8 (5,1)   |
| 22                                                                                                                                                                                                                                                                                                   | N. <sup>o</sup> of daily scans 6M         | Sex, Age, Pubertal stage, Presence of comorbidities, Time since diagnosis, HbA1c 6M, BMI 6M, N. <sup>o</sup> severe hypoglycaemia events 6M, N. <sup>o</sup> of daily scans 3M                                                                                              | pmm | 19 (12,2) |
| 23                                                                                                                                                                                                                                                                                                   | N. <sup>o</sup> of daily scans 12M        | Sex, Age, Pubertal stage, Presence of comorbidities, Time since diagnosis, HbA1c 12M, BMI 12M, N. <sup>o</sup> severe hypoglycaemia events 12M, N. <sup>o</sup> of daily scans 6M                                                                                           | pmm | 28 (17,9) |
| 24                                                                                                                                                                                                                                                                                                   | Sensor usage time 3M                      | Sex, Age, Pubertal stage, Presence of comorbidities, Time since diagnosis, HbA1c 3M, N. <sup>o</sup> ketoacidosis 3M, N. <sup>o</sup> of daily scans 3M                                                                                                                     | pmm | 8 (5,1)   |
| 25                                                                                                                                                                                                                                                                                                   | Sensor usage time 6M                      | Sex, Age, Pubertal stage, Presence of comorbidities, Time since diagnosis, HbA1c 6M, N. <sup>o</sup> ketoacidosis 6M, N. <sup>o</sup> of daily scans 6M, Sensor usage time 3M                                                                                               | pmm | 19 (12,2) |
| 26                                                                                                                                                                                                                                                                                                   | Sensor usage time 12M                     | Sex, Age, Pubertal stage, Presence of comorbidities, Time since diagnosis, HbA1c 12M, N. <sup>o</sup> ketoacidosis 12M, N. <sup>o</sup> of daily scans 12M, Sensor usage time 6M                                                                                            | pmm | 28 (17,9) |
| 27                                                                                                                                                                                                                                                                                                   | N. <sup>o</sup> Sensors 3M                | Sex, Age, Pubertal stage, Presence of comorbidities, Time since diagnosis, N. <sup>o</sup> ketoacidosis 3M, Sensor usage time 3M                                                                                                                                            | pmm | 7 (4,5)   |
| 28                                                                                                                                                                                                                                                                                                   | N. <sup>o</sup> Sensors 6M                | Sex, Age, Pubertal stage, Presence of comorbidities, Time since diagnosis, N. <sup>o</sup> ketoacidosis 6M, Sensor usage time 6M, N. <sup>o</sup> Sensors 3M                                                                                                                | pmm | 19 (12,2) |
| 29                                                                                                                                                                                                                                                                                                   | N. <sup>o</sup> Sensors 12M               | Sex, Age, Pubertal stage, Presence of comorbidities, Time since diagnosis, N. <sup>o</sup> ketoacidosis 12M, Sensor usage time 12M, N. <sup>o</sup> Sensors 6M                                                                                                              | pmm | 28 (17,9) |
| DM = Diabetes Mellitus; T1DM = Type 1 Diabetes Mellitus; DTSQ = Diabetes Treatment Satisfaction Questionnaire; EQ-5D-Y = Health-related quality of life questionnaire; VAS = visual analogue scale; HbA1c = Glycated haemoglobin; EHR = Electronic Health Record; BMI = Body mass index; M = Months. |                                           |                                                                                                                                                                                                                                                                             |     |           |

## Appendix 2. Cost estimation

### List of tables:

Table A1. Use of resources and unit costs

Table A2. Total annual cost per patient of the FSL flash glucose monitoring system (€2021)

Table A3. Average number of test strips and lancets per patient and total annual costs due to lost parent/caregiver productivity before and after FSL use.

### List of figures:

Figure A1. Total annual costs per patient before and after use of the FSL (does not include cost of device)



**Table A1. Use of resources and unit costs**

|                                 | Unit cost €2021<br>(SD) | Source                             |
|---------------------------------|-------------------------|------------------------------------|
| Hospitalization /day            | 652.58 (188.86)         | Public tariff*                     |
| Visit to specialist             | 95.65 (33.98)           | Public tariff*                     |
| Visit to nurse at primary care  | 27.06 (7.52)            | Public tariff*                     |
| Hospital emergency              | 207.54 (72.03)          | Public tariff*                     |
| Visit to doctor at primary care | 50.91 (17.63)           | Public tariff*                     |
| Non-hospital emergency          | 99.41 (22.83)           | Public tariff*                     |
| HbA1c determination             | 7.15 (5.16)             | Public tariff*                     |
| Test strips                     | 0.43 (0.15)             | Consult*                           |
| Lancets                         | 0.109 (0.11)            | Consult*                           |
| Absenteeism day                 | 166.896                 | Estimate based on Eurostat and INE |

SD = Standard Deviation

\* Spanish autonomous communities.

INE = Spanish Statistical Office.

Unit costs come from different sources, all national, and include official tariffs. Where possible, the average costs of those Spanish regions for which data were available were taken into account

To estimate the unit cost of test strips and lancets, the Spanish regions were consulted for their spending on these products. There was great heterogeneity between regions, not only in the unit cost (between €0.10 and €0.48), but also in the products financed, since lancets are only financed in some regions.

**Table A2. Total annual cost per patient of the FSL flash glucose monitoring system (€2021)**

|                | Primary care        | Emergency         | Specialist          | Laboratory       | Monitoring*         | Total costs        |
|----------------|---------------------|-------------------|---------------------|------------------|---------------------|--------------------|
| Mean (SD)      | 136.78<br>(101.28)  | 50.70<br>(161.66) | 415.48<br>(129.53)  | 29.05 (5.87)     | 447.25<br>(317.58)  | 1079.26 (425.73)   |
| Min. –<br>Max. | 0 – 474.24          | 0 – 1245.24       | 0 – 956.5           | 14.30 –<br>71.50 | 0 – 1295.39         | 219.9 – 2501.19    |
| CI95%          | (119.88;<br>154.65) | (25.74;<br>80.73) | (393.81;<br>438.65) | (28.1;<br>30.16) | (392.57;<br>501.77) | (1007.41; 1152.15) |

CI95% = Confidence interval at 95% by Bootstrap based on 10,000 samples; Max. = Maximum; Min. = Minimum; SD = Standard Deviation

\*Test strips and lancets. Not include the cost of sensor

**Table A3. Average number of test strips and lancets per patient and total annual costs due to lost parent/caregiver productivity before and after FSL use.**

|                                                                                                     | Before use of the flash glucose monitoring system | After use of the flash glucose monitoring system |
|-----------------------------------------------------------------------------------------------------|---------------------------------------------------|--------------------------------------------------|
| <b>Average number of test strips and lancets per patient before and after use of the FSL device</b> |                                                   |                                                  |
| Yearly test strips, mean (SD)                                                                       | 2686.02 (527.63)                                  | 883.98 (669.45)                                  |
| Yearly Lancets, mean (SD)                                                                           | 1366.41 (1063.44)                                 | 615.94 (482.03)                                  |
| <b>Total annual cost per patient due to productivity losses (€2021)</b>                             |                                                   |                                                  |
| Mean (SD)                                                                                           | 545.67 (588.29)                                   | 262.73 (334.30)                                  |
| Min. – Max.                                                                                         | 0 – 3504.82                                       | 0 – 1668.96                                      |
| CI95%                                                                                               | (448.55; 650.63)                                  | (206.65; 322.71)                                 |

CI95% = Confidence interval at 95% by Bootstrap based on 10,000 samples; Max. = Maximum; Min. = Minimum; SD = Standard Deviation

**Figure A1. Total annual costs per patient before and after use of the FSL (does not include cost of device)**

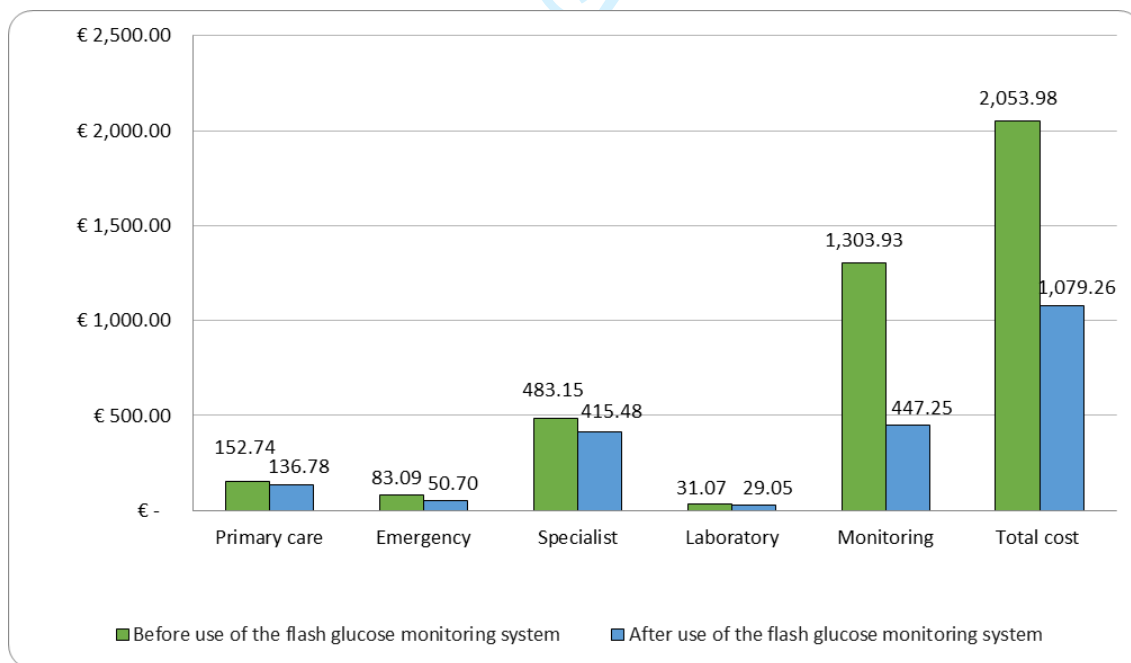

**Appendix 3. Evolution of outcome measures during follow-up (by age group and baseline HbA1c control)**

|                                                                                        | Baseline    | 3 months    | 6 months    | 12 months   | Differences 12 months-Baseline |
|----------------------------------------------------------------------------------------|-------------|-------------|-------------|-------------|--------------------------------|
| <b>HbA1c, mean (SD)</b>                                                                |             |             |             |             |                                |
| Total                                                                                  | 7.86 (1.36) | 7.58 (1.27) | 7.59 (1.16) | 7.73 (1.06) | -0.13 (-0.42; 0.16)            |
| HbA1c <7.5%                                                                            | 6.82 (0.36) | 6.86 (0.55) | 6.96 (0.6)  | 7.14 (0.57) | 0.32 (0.15; 0.49)              |
| HbA1c ≥7.5%                                                                            | 8.65 (1.31) | 8.18 (1.38) | 8.14 (1.25) | 8.2 (1.12)  | -0.45 (-0.84; -0.06)           |
| < 12 years                                                                             | 7.83 (1.17) | 7.42 (0.93) | 7.53 (0.96) | 7.57 (0.8)  | -0.26 (-0.59; 0.07)            |
| ≥ 12 years                                                                             | 7.87 (1.45) | 7.66 (1.41) | 7.63 (1.26) | 7.82 (1.19) | -0.05 (-0.45; 0.35)            |
| <b>With self-reported severe hypoglycemia, n (%)</b>                                   |             |             |             |             |                                |
| Total                                                                                  | 49 (31.4)   | -           | -           | 55 (36.9)   | 5.5% (-12.7; 23.7)             |
| HbA1c <7.5%                                                                            | 26 (38.2)   | -           | -           | 24 (35.3)   | -2.9% (-29.6; 23.8)            |
| HbA1c ≥7.5%                                                                            | 23 (26.1)   | -           | -           | 31 (38.3)   | 12.2% (-12.6; 37.0)            |
| < 12 years                                                                             | 22 (41.5)   | -           | -           | 19 (37.3)   | -4.2% (-34.1; 25.7)            |
| ≥ 12 years                                                                             | 27 (26.2)   | -           | -           | 36 (36.7)   | 10.5% (-12.4; 33.4)            |
| <b>Nº. Self-reported severe hypoglycemia, mean (SD)</b>                                |             |             |             |             |                                |
| Total                                                                                  | 1.72 (3.65) | -           | -           | 1.77 (5.08) | 0.05 (-0.98; 1.1)              |
| HbA1c <7.5%                                                                            | 2.34 (4.13) | -           | -           | 1.95 (5.69) | -0.39 (-2.2; 1.4)              |
| HbA1c ≥7.5%                                                                            | 1.26 (3.19) | -           | -           | 1.63 (4.58) | 0.37 (-0.86; 1.6)              |
| < 12 years                                                                             | 2.12 (4.04) | -           | -           | 1.06 (3.65) | -1.06 (-2.6; 0.48)             |
| ≥ 12 years                                                                             | 1.52 (3.43) | -           | -           | 2.20 (5.76) | 0.68 (-0.69; 2.1)              |
| <b>With severe hypoglycemia in the electronic clinical record, n (%)</b>               |             |             |             |             |                                |
| Total                                                                                  | 19 (12.2)   | -           | -           | 23 (15.4)   | 3.2% (-17.6; 24.0)             |
| HbA1c <7.5%                                                                            | 6 (8.8)     | -           | -           | 6 (8.8)     | 0% (-32.0; 32.0)               |
| HbA1c ≥7.5%                                                                            | 13 (14.8)   | -           | -           | 17 (21.0)   | 6.2% (-21.1; 33.5)             |
| < 12 years                                                                             | 9 (17.0)    | -           | -           | 6 (11.8)    | -5.2% (-40.8; 30.4)            |
| ≥ 12 years                                                                             | 10 (9.7)    | -           | -           | 17 (17.4)   | 7.7% (-0.18; 0.33)             |
| <b>Nº Hypoglycemia in the electronic clinical record prior to the study, mean (SD)</b> |             |             |             |             |                                |
| Total                                                                                  | 0.39 (1.68) | -           | -           | 0.54 (1.58) | 0.15 (-0.23; 0.53)             |
| HbA1c <7.5%                                                                            | 0.13 (0.45) | -           | -           | 0.25 (1.06) | 0.12 (-0.16; 0.40)             |
| HbA1c ≥7.5%                                                                            | 0.59 (2.18) | -           | -           | 0.78 (1.88) | 0.19 (-0.43; 0.81)             |
| < 12 years                                                                             | 0.34 (1.02) | -           | -           | 0.61 (1.89) | 0.27 (-0.32; 0.86)             |
| ≥ 12 years                                                                             | 0.42 (1.94) | -           | -           | 0.5 (1.40)  | 0.08 (-0.39; 0.55)             |
| <b>Health-related quality of life (EQ-5D-Y), n (%)</b>                                 |             |             |             |             |                                |
| <b>Mobility (no problems), n (%)</b>                                                   |             |             |             |             |                                |
| Total                                                                                  | 156 (100)   | -           | -           | 124 (100)   | -                              |
| HbA1c <7.5%                                                                            | 68 (100)    | -           | -           | 54 (100)    | -                              |
| HbA1c ≥7.5%                                                                            | 88 (100)    | -           | -           | 70 (100)    | -                              |
| < 12 years                                                                             | 53 (100)    | -           | -           | 47 (100)    | -                              |
| ≥ 12 years                                                                             | 103 (100)   | -           | -           | 77 (100)    | -                              |
| <b>Self-Care (no problems), n (%)</b>                                                  |             |             |             |             |                                |
| Total                                                                                  | 154 (98.7)  | -           | -           | 123 (99.2)  | -                              |
| HbA1c <7.5%                                                                            | 67 (98.5)   | -           | -           | 54 (100)    | -                              |
| HbA1c ≥7.5%                                                                            | 87 (98.9)   | -           | -           | 69 (98.6)   | -                              |
| < 12 years                                                                             | 51 (96.2)   | -           | -           | 47 (100)    | -                              |
| ≥ 12 years                                                                             | 103 (100)   | -           | -           | 76 (98.7)   | -                              |
| <b>Usual Activities (no problems), n (%)</b>                                           |             |             |             |             |                                |
| Total                                                                                  | 154 (98.7)  | -           | -           | 122 (98.4)  | -                              |
| HbA1c <7.5%                                                                            | 67 (98.5)   | -           | -           | 53 (98.1)   | -                              |
| HbA1c ≥7.5%                                                                            | 87 (98.9)   | -           | -           | 69 (98.6)   | -                              |
| < 12 years                                                                             | 53 (100)    | -           | -           | 47 (100)    | -                              |
| ≥ 12 years                                                                             | 101 (98.1)  | -           | -           | 75 (97.4)   | -                              |
| <b>Pain or Discomfort (no pain), n (%)</b>                                             |             |             |             |             |                                |
| Total                                                                                  | 144 (92.3)  | -           | -           | 118 (95.2)  | -                              |
| HbA1c <7.5%                                                                            | 62 (91.2)   | -           | -           | 53 (98.1)   | -                              |
| HbA1c ≥7.5%                                                                            | 82 (93.2)   | -           | -           | 65 (92.9)   | -                              |
| < 12 years                                                                             | 50 (94.3)   | -           | -           | 45 (95.7)   | -                              |
| ≥ 12 years                                                                             | 94 (91.3)   | -           | -           | 73 (94.8)   | -                              |

|                                                                                    |                 |                 |                 |                  |                                |
|------------------------------------------------------------------------------------|-----------------|-----------------|-----------------|------------------|--------------------------------|
| <b>Pain or Discomfort (some pain), n (%)</b>                                       |                 |                 |                 |                  |                                |
| Total                                                                              | 12 (7.7)        | -               | -               | 6 (4.8)          | -                              |
| HbA1c <7.5%                                                                        | 6 (8.8)         | -               | -               | 1 (1.9)          | -                              |
| HbA1c ≥7.5%                                                                        | 6 (6.8)         | -               | -               | 5 (7.1)          | -                              |
| < 12 years                                                                         | 3 (5.7)         | -               | -               | 2 (4.3)          | -                              |
| ≥ 12 years                                                                         | 9 (8.7)         | -               | -               | 4 (5.2)          | -                              |
| <b>Anxiety/Depression (no problems), n (%)</b>                                     |                 |                 |                 |                  |                                |
| Total                                                                              | 137 (87.8)      | -               | -               | 112 (90.3)       | -                              |
| HbA1c <7.5%                                                                        | 62 (91.2)       | -               | -               | 50 (92.6)        | -                              |
| HbA1c ≥7.5%                                                                        | 75 (85.2)       | -               | -               | 62 (88.6)        | -                              |
| < 12 years                                                                         | 49 (92.5)       | -               | -               | 44 (93.6)        | -                              |
| ≥ 12 years                                                                         | 88 (85.4)       | -               | -               | 68 (88.3)        | -                              |
| <b>Anxiety/Depression (some problems), n (%)</b>                                   |                 |                 |                 |                  |                                |
| Total                                                                              | 16 (10.3)       | -               | -               | 10 (8.1)         | -                              |
| HbA1c <7.5%                                                                        | 5 (7.4)         | -               | -               | 4 (7.4)          | -                              |
| HbA1c ≥7.5%                                                                        | 11 (12.5)       | -               | -               | 6 (8.6)          | -                              |
| < 12 years                                                                         | 3 (5.7)         | -               | -               | 2 (4.3)          | -                              |
| ≥ 12 years                                                                         | 13 (12.6)       | -               | -               | 8 (10.4)         | -                              |
| <b>VAS, mean (sd)</b>                                                              |                 |                 |                 |                  |                                |
| Total                                                                              | 87.63 (12.46)   | -               | -               | 84.17 (12.28)    | -3.5 (-6.4; -0.53)             |
| HbA1c <7.5%                                                                        | 88.79 (10.05)   | -               | -               | 87.92 (10.08)    | 0.29 (-3.9; 4.5)               |
| HbA1c ≥7.5%                                                                        | 86.74 (14.04)   | -               | -               | 81.29 (16.29)    | -7.5 (-11.7; -3.3)             |
| < 12 years                                                                         | 91.66 (9.72)    | -               | -               | 85.61 (14.97)    | -6.1 (-11.0; -1.1)             |
| ≥ 12 years                                                                         | 85.56 (13.23)   | -               | -               | 83.27 (13.86)    | -2.3 (-6.3; 1.7)               |
| <b>Knowledge about DM1 (modified version of Mitchell questionnaire), mean (SD)</b> |                 |                 |                 |                  |                                |
| Total                                                                              | 11.68 (2.13)    | -               | -               | 12.09 (1.94)     | 0.41 (-0.11; 0.93)             |
| HbA1c <7.5%                                                                        | 12.38 (1.98)    | -               | -               | 12.92 (1.35)     | 0.54 (-0.11; 1.2)              |
| HbA1c ≥7.5%                                                                        | 11.12 (2.08)    | -               | -               | 11.38 (2.08)     | 0.26 (-0.45; 0.97)             |
| < 12 years                                                                         | 11.87 (2.07)    | -               | -               | 11.9 (2.31)      | 0.03 (-0.90; 0.96)             |
| ≥ 12 years                                                                         | 11.59 (2.16)    | -               | -               | 12.21 (1.67)     | 0.62 (-0.001; 1.2)             |
| <b>Diabetes Treatment Satisfaction Questionnaire (DTSQ)</b>                        |                 |                 |                 |                  |                                |
| <b>Perceived hyperglycemia, mean (SD)</b>                                          |                 |                 |                 |                  |                                |
| Total                                                                              | 3.53 (1.51)     | -               | -               | 3.32 (1.44)      | -0.21 (-0.58; 0.16)            |
| HbA1c <7.5%                                                                        | 2.94 (1.28)     | -               | -               | 2.88 (1.44)      | -0.06 (-0.57; 0.45)            |
| HbA1c ≥7.5%                                                                        | 4.01 (1.51)     | -               | -               | 3.71 (1.34)      | -0.3 (-0.79; 0.19)             |
| < 12 years                                                                         | 3.62 (1.38)     | -               | -               | 3.44 (1.48)      | -0.18 (-0.79; 0.43)            |
| ≥ 12 years                                                                         | 3.48 (1.57)     | -               | -               | 3.25 (1.42)      | -0.23 (-0.71; 0.25)            |
| <b>Perceived hypoglycemia, mean (SD)</b>                                           |                 |                 |                 |                  |                                |
| Total                                                                              | 2.22 (1.35)     | -               | -               | 2.04 (1.32)      | -0.18 (-0.52; 0.16)            |
| HbA1c <7.5%                                                                        | 2.3 (1.36)      | -               | -               | 2 (1.31)         | -0.3 (-0.80; 0.20)             |
| HbA1c ≥7.5%                                                                        | 2.15 (1.35)     | -               | -               | 2.07 (1.34)      | -0.08 (-0.54; 0.38)            |
| < 12 years                                                                         | 2.19 (1.17)     | -               | -               | 2.05 (1.26)      | -0.14 (-0.66; 0.38)            |
| ≥ 12 years                                                                         | 2.23 (1.44)     | -               | -               | 2.03 (1.36)      | -0.2 (-0.64; 0.24)             |
| <b>Satisfaction with treatment, mean (SD)</b>                                      |                 |                 |                 |                  |                                |
| Total                                                                              | 25.89 (6.7)     | -               | -               | 29.82 (5.44)     | 3.93 (2.4; 5.5)                |
| HbA1c <7.5%                                                                        | 26.58 (7.04)    | -               | -               | 29.78 (5.1)      | 3.2 (0.86; 5.5)                |
| HbA1c ≥7.5%                                                                        | 25.33 (6.41)    | -               | -               | 29.86 (5.77)     | 4.53 (2.4; 6.6)                |
| < 12 years                                                                         | 25.79 (6.71)    | -               | -               | 29.61 (5.87)     | 3.82 (1.1; 6.5)                |
| ≥ 12 years                                                                         | 25.95 (6.73)    | -               | -               | 29.96 (5.21)     | 4.01 (2.1; 5.9)                |
|                                                                                    | <b>Baseline</b> | <b>3 months</b> | <b>6 months</b> | <b>12 months</b> | <b>Differences 12-3 months</b> |
| <b>Sensor usage time (%), mean (SD)</b>                                            |                 |                 |                 |                  |                                |
| Total                                                                              | -               | 81.60 (20.78)   | 84.42 (19.47)   | 88.55 (18.48)    | 6.95 (2.3; 11.6)               |
| HbA1c <7.5%                                                                        | -               | 83.99 (21.93)   | 86.60 (17.2)    | 91.70 (15.09)    | 7.71 (0.90; 14.5)              |
| HbA1c ≥7.5%                                                                        | -               | 79.63 (19.69)   | 82.57 (21.16)   | 86.01 (20.57)    | 6.38 (-0.8; 12.8)              |
| < 12 years                                                                         | -               | 87.59 (15.06)   | 90.60 (14.34)   | 94.51 (11.81)    | 6.92 (1.5; 12.3)               |
| ≥ 12 years                                                                         | -               | 78.45 (22.67)   | 81.09 (21.07)   | 84.85 (20.84)    | 6.4 (-0.14; 12.9)              |
| <b>Number of scans per day, mean (SD)</b>                                          |                 |                 |                 |                  |                                |

1  
2  
3  
4  
5  
6  
7  
8  
9  
10  
11  
12  
13  
14  
15  
16  
17  
18  
19  
20  
21  
22  
23  
24  
25  
26  
27  
28  
29  
30  
31  
32  
33  
34  
35  
36  
37  
38  
39  
40  
41  
42  
43  
44  
45  
46  
47  
48  
49  
50  
51  
52  
53  
54  
55  
56  
57  
58  
59  
60

|             |   |              |             |              |                   |
|-------------|---|--------------|-------------|--------------|-------------------|
| Total       | - | 9.16 (5.06)  | 9.33 (4.97) | 9.84 (6.02)  | 0.68 (-0.64; 2.0) |
| HbA1c <7.5% | - | 10.06 (5.11) | 9.89 (5.07) | 10.39 (5.45) | 0.33 (-1.6; 2.2)  |
| HbA1c ≥7.5% | - | 8.41 (4.92)  | 8.85 (4.86) | 9.39 (6.46)  | 0.98 (-0.87; 2.8) |
| < 12 years  | - | 11.67 (5.64) | 11.27 (4.5) | 12.96 (6.45) | 1.29 (-1.1; 3.7)  |
| ≥ 12 years  | - | 7.83 (4.17)  | 8.27 (4.91) | 7.90 (4.85)  | 0.07 (-1.3; 1.4)  |

---

**Number of sensors used, mean (SD)**

|             |   |             |             |              |                 |
|-------------|---|-------------|-------------|--------------|-----------------|
| Total       | - | 6.40 (1.36) | 7.50 (2.86) | 14.74 (5.81) | 8.34 (7.4; 9.3) |
| HbA1c <7.5% | - | 6.32 (1.37) | 6.86 (1.76) | 13.35 (4.47) | 7.03 (5.9; 8.2) |
| HbA1c ≥7.5% | - | 6.46 (1.36) | 8.05 (3.46) | 15.86 (6.51) | 9.4 (7.9; 10.9) |
| < 12 years  | - | 6.63 (1.17) | 6.90 (2.15) | 14.73 (5.83) | 8.1 (6.5; 7.8)  |
| ≥ 12 years  | - | 6.28 (1.44) | 7.83 (3.15) | 14.75 (5.83) | 8.47 (7.3; 9.7) |

---

SD = standard deviation; VAS = Visual Analogue Scale; HbA1c = Glycosylated Haemoglobin; CI = Confidence Interval; GT = glucose time.

For peer review only

STROBE Statement—Checklist of items that should be included in reports of *cohort studies*

|                           | Item No | Recommendation                                                                                                                                                                                                                                                                                                         | Page No                        |
|---------------------------|---------|------------------------------------------------------------------------------------------------------------------------------------------------------------------------------------------------------------------------------------------------------------------------------------------------------------------------|--------------------------------|
| <b>Title and abstract</b> | 1       | (a) Indicate the study's design with a commonly used term in the title or the abstract<br>(b) Provide in the abstract an informative and balanced summary of what was done and what was found                                                                                                                          | 1<br>1                         |
| <b>Introduction</b>       |         |                                                                                                                                                                                                                                                                                                                        |                                |
| Background/rationale      | 2       | Explain the scientific background and rationale for the investigation being reported                                                                                                                                                                                                                                   | 3                              |
| Objectives                | 3       | State specific objectives, including any prespecified hypotheses                                                                                                                                                                                                                                                       | 3                              |
| <b>Methods</b>            |         |                                                                                                                                                                                                                                                                                                                        |                                |
| Study design              | 4       | Present key elements of study design early in the paper                                                                                                                                                                                                                                                                | 4                              |
| Setting                   | 5       | Describe the setting, locations, and relevant dates, including periods of recruitment, exposure, follow-up, and data collection                                                                                                                                                                                        | 4                              |
| Participants              | 6       | (a) Give the eligibility criteria, and the sources and methods of selection of participants. Describe methods of follow-up<br>(b) For matched studies, give matching criteria and number of exposed and unexposed                                                                                                      | 4                              |
| Variables                 | 7       | Clearly define all outcomes, exposures, predictors, potential confounders, and effect modifiers. Give diagnostic criteria, if applicable                                                                                                                                                                               | 4-5                            |
| Data sources/measurement  | 8*      | For each variable of interest, give sources of data and details of methods of assessment (measurement). Describe comparability of assessment methods if there is more than one group                                                                                                                                   | 5                              |
| Bias                      | 9       | Describe any efforts to address potential sources of bias                                                                                                                                                                                                                                                              | 5                              |
| Study size                | 10      | Explain how the study size was arrived at                                                                                                                                                                                                                                                                              | 5                              |
| Quantitative variables    | 11      | Explain how quantitative variables were handled in the analyses. If applicable, describe which groupings were chosen and why                                                                                                                                                                                           |                                |
| Statistical methods       | 12      | (a) Describe all statistical methods, including those used to control for confounding<br>(b) Describe any methods used to examine subgroups and interactions<br>(c) Explain how missing data were addressed<br>(d) If applicable, explain how loss to follow-up was addressed<br>(e) Describe any sensitivity analyses | 5-6<br>5-6<br>5-6<br>5-6<br>NA |
| <b>Results</b>            |         |                                                                                                                                                                                                                                                                                                                        |                                |
| Participants              | 13*     | (a) Report numbers of individuals at each stage of study—eg numbers potentially eligible, examined for eligibility, confirmed eligible, included in the study, completing follow-up, and analysed<br>(b) Give reasons for non-participation at each stage<br>(c) Consider use of a flow diagram                        | 7<br>7<br>7                    |
| Descriptive data          | 14*     | (a) Give characteristics of study participants (eg demographic, clinical, social) and information on exposures and potential confounders<br>(b) Indicate number of participants with missing data for each variable of interest<br>(c) Summarise follow-up time (eg, average and total amount)                         | 7<br>Apex 1<br>7               |
| Outcome data              | 15*     | Report numbers of outcome events or summary measures over time                                                                                                                                                                                                                                                         | 8                              |

|    |                          |    |                                                                                                                                                                                                              |       |
|----|--------------------------|----|--------------------------------------------------------------------------------------------------------------------------------------------------------------------------------------------------------------|-------|
| 1  | Main results             | 16 | (a) Give unadjusted estimates and, if applicable, confounder-adjusted estimates and their precision (eg, 95% confidence interval). Make clear which confounders were adjusted for and why they were included | 8     |
| 2  |                          |    | (b) Report category boundaries when continuous variables were categorized                                                                                                                                    | 8     |
| 3  |                          |    | (c) If relevant, consider translating estimates of relative risk into absolute risk for a meaningful time period                                                                                             | NA    |
| 4  |                          |    |                                                                                                                                                                                                              |       |
| 5  |                          |    |                                                                                                                                                                                                              |       |
| 6  |                          |    |                                                                                                                                                                                                              |       |
| 7  |                          |    |                                                                                                                                                                                                              |       |
| 8  |                          |    |                                                                                                                                                                                                              |       |
| 9  | Other analyses           | 17 | Report other analyses done—eg analyses of subgroups and interactions, and sensitivity analyses                                                                                                               | 9     |
| 10 |                          |    |                                                                                                                                                                                                              |       |
| 11 |                          |    |                                                                                                                                                                                                              |       |
| 12 | <b>Discussion</b>        |    |                                                                                                                                                                                                              |       |
| 13 | Key results              | 18 | Summarise key results with reference to study objectives                                                                                                                                                     | 10-11 |
| 14 |                          |    |                                                                                                                                                                                                              |       |
| 15 | Limitations              | 19 | Discuss limitations of the study, taking into account sources of potential bias or imprecision. Discuss both direction and magnitude of any potential bias                                                   | 10-11 |
| 16 |                          |    |                                                                                                                                                                                                              |       |
| 17 | Interpretation           | 20 | Give a cautious overall interpretation of results considering objectives, limitations, multiplicity of analyses, results from similar studies, and other relevant evidence                                   | 10-11 |
| 18 |                          |    |                                                                                                                                                                                                              |       |
| 19 |                          |    |                                                                                                                                                                                                              |       |
| 20 | Generalisability         | 21 | Discuss the generalisability (external validity) of the study results                                                                                                                                        | 10-11 |
| 21 |                          |    |                                                                                                                                                                                                              |       |
| 22 | <b>Other information</b> |    |                                                                                                                                                                                                              |       |
| 23 | Funding                  | 22 | Give the source of funding and the role of the funders for the present study and, if applicable, for the original study on which the present article is based                                                | 15    |
| 24 |                          |    |                                                                                                                                                                                                              |       |
| 25 |                          |    |                                                                                                                                                                                                              |       |
| 26 |                          |    |                                                                                                                                                                                                              |       |

27 \*Give information separately for exposed and unexposed groups.

28  
29  
30 **Note:** An Explanation and Elaboration article discusses each checklist item and gives methodological background and published examples of transparent reporting. The STROBE checklist is best used in conjunction with this article (freely available on the Web sites of PLoS Medicine at <http://www.plosmedicine.org/>, Annals of Internal Medicine at <http://www.annals.org/>, and Epidemiology at <http://www.epidem.com/>). Information on the STROBE Initiative is available at <http://www.strobe-statement.org>.

31  
32  
33  
34  
35  
36  
37  
38  
39  
40  
41  
42  
43  
44  
45  
46  
47  
48  
49  
50  
51  
52  
53  
54  
55  
56  
57  
58  
59  
60

# BMJ Open

## Effectiveness, safety and costs of the FreeStyle Libre Glucose Monitoring System for children and adolescents with T1DM in Spain: a prospective uncontrolled pre-post study

|                                 |                                                                                                                                                                                                                                                                                                                                                                                                                                                                                                                                                                                                                                                                                                                                                                                                                                                                                                                                                                 |
|---------------------------------|-----------------------------------------------------------------------------------------------------------------------------------------------------------------------------------------------------------------------------------------------------------------------------------------------------------------------------------------------------------------------------------------------------------------------------------------------------------------------------------------------------------------------------------------------------------------------------------------------------------------------------------------------------------------------------------------------------------------------------------------------------------------------------------------------------------------------------------------------------------------------------------------------------------------------------------------------------------------|
| Journal:                        | <i>BMJ Open</i>                                                                                                                                                                                                                                                                                                                                                                                                                                                                                                                                                                                                                                                                                                                                                                                                                                                                                                                                                 |
| Manuscript ID                   | bmjopen-2022-071334.R1                                                                                                                                                                                                                                                                                                                                                                                                                                                                                                                                                                                                                                                                                                                                                                                                                                                                                                                                          |
| Article Type:                   | Original research                                                                                                                                                                                                                                                                                                                                                                                                                                                                                                                                                                                                                                                                                                                                                                                                                                                                                                                                               |
| Date Submitted by the Author:   | 01-Aug-2023                                                                                                                                                                                                                                                                                                                                                                                                                                                                                                                                                                                                                                                                                                                                                                                                                                                                                                                                                     |
| Complete List of Authors:       | González-Pacheco, Himar; Fundacion Canaria Instituto de Investigacion Sanitaria de Canarias<br>Rivero-Santana, Amado ; Fundacion Canaria Instituto de Investigacion Sanitaria de Canarias<br>Ramallo Farina, Yolanda; Fundación Canaria Instituto de Investigación Sanitaria de Canarias<br>Valcárcel-Nazco, Cristina; Fundacion Canaria Instituto de Investigacion Sanitaria de Canarias<br>Álvarez-Pérez, Yolanda; Fundacion Canaria Instituto de Investigacion Sanitaria de Canarias<br>García-Pérez, Lidia; Fundacion Canaria Instituto de Investigacion Sanitaria de Canarias, Servicio de Evaluación del Servicio Canario de la Salud (SESCS)<br>García-Bello, Miguel Angel; Fundacion Canaria Instituto de Investigacion Sanitaria de Canarias<br>Perestelo-Pérez, Lilisbeth; Servicio de Evaluación y Planificación del Servicio Canario de la Salud<br>Serrano-Aguilar, Pedro; Servicio de Evaluación y Planificación del Servicio Canario de la Salud |
| <b>Primary Subject Heading</b>: | Diabetes and endocrinology                                                                                                                                                                                                                                                                                                                                                                                                                                                                                                                                                                                                                                                                                                                                                                                                                                                                                                                                      |
| Secondary Subject Heading:      | Diabetes and endocrinology, Public health                                                                                                                                                                                                                                                                                                                                                                                                                                                                                                                                                                                                                                                                                                                                                                                                                                                                                                                       |
| Keywords:                       | Paediatric endocrinology < DIABETES & ENDOCRINOLOGY, PUBLIC HEALTH, Health economics < HEALTH SERVICES ADMINISTRATION & MANAGEMENT                                                                                                                                                                                                                                                                                                                                                                                                                                                                                                                                                                                                                                                                                                                                                                                                                              |
|                                 |                                                                                                                                                                                                                                                                                                                                                                                                                                                                                                                                                                                                                                                                                                                                                                                                                                                                                                                                                                 |

SCHOLARONE™  
Manuscripts





I, the Submitting Author has the right to grant and does grant on behalf of all authors of the Work (as defined in the below author licence), an exclusive licence and/or a non-exclusive licence for contributions from authors who are: i) UK Crown employees; ii) where BMJ has agreed a CC-BY licence shall apply, and/or iii) in accordance with the terms applicable for US Federal Government officers or employees acting as part of their official duties; on a worldwide, perpetual, irrevocable, royalty-free basis to BMJ Publishing Group Ltd ("BMJ") its licensees and where the relevant Journal is co-owned by BMJ to the co-owners of the Journal, to publish the Work in this journal and any other BMJ products and to exploit all rights, as set out in our [licence](#).

The Submitting Author accepts and understands that any supply made under these terms is made by BMJ to the Submitting Author unless you are acting as an employee on behalf of your employer or a postgraduate student of an affiliated institution which is paying any applicable article publishing charge ("APC") for Open Access articles. Where the Submitting Author wishes to make the Work available on an Open Access basis (and intends to pay the relevant APC), the terms of reuse of such Open Access shall be governed by a Creative Commons licence – details of these licences and which [Creative Commons](#) licence will apply to this Work are set out in our licence referred to above.

Other than as permitted in any relevant BMJ Author's Self Archiving Policies, I confirm this Work has not been accepted for publication elsewhere, is not being considered for publication elsewhere and does not duplicate material already published. I confirm all authors consent to publication of this Work and authorise the granting of this licence.

## Effectiveness, safety and costs of the FreeStyle Libre Glucose Monitoring System for children and adolescents with T1DM in Spain: a prospective uncontrolled pre-post study

### Author names and affiliations

Himar González-Pacheco<sup>1,2,3,4</sup>, Amado Rivero-Santana<sup>1,2,3,4</sup>, Yolanda Ramallo-Fariña<sup>1,2,3,4</sup>, Cristina Valcárcel-Nazco<sup>1,2,3,4</sup>, Yolanda Álvarez-Pérez<sup>1,2,3,4</sup>, Lidia García-Pérez<sup>1,2,3,4</sup>, Miguel Ángel García-Bello<sup>1,2,3,4</sup>, Lilisbeth Perestelo-Pérez<sup>1,2,3,4,5</sup>, Pedro Serrano-Aguilar<sup>1,2,3,4,5</sup>, Health Professional Group.

1. Canary Islands Health Research Institute Foundation (FIISC), Tenerife, Spain
2. Spanish Network of Agencies for Assessing National Health System Technologies and Performance (RedETS), Spain
3. Network for Research on Chronicity, Primary Care, and Health Promotion (RICAPPS), Tenerife, Spain
4. Institute of Biomedical Technologies (ITB), Tenerife, Spain
5. Evaluation Unit (SESCS), Canary Islands Health Services (SCS), Tenerife, Spain

### Corresponding author

Himar González Pacheco

[Himar.gonzalezpacheco@sescs.es](mailto:Himar.gonzalezpacheco@sescs.es)

### Abstract

#### Objectives

Evaluate the effectiveness, safety and costs of the FreeStyle Libre® (FSL) for Type 1 Diabetes Mellitus (T1DM) in underage.

#### Design

Prospective multicentre pre-post study.

#### Setting

Patients were recruited from thirteen Spanish public hospitals with a 12-months follow-up.

#### Participants

A total of 156 patients were included.

#### Primary and secondary outcome measures

Primary outcome: HbA1c change. Secondary measures: severe hypoglycaemic events (self-reported and registered in clinical records), quality of life, disease knowledge, treatment satisfaction, adverse events, adherence, sensor usage time and scans. Healthcare resource utilization was assessed for cost analysis from the National Health System (NHS) perspective, incorporating direct healthcare costs. Data analysis utilized mixed regression models with repeated measures. Intervention's total cost estimated by multiplying health resource usage with unit costs.

#### Results

In the whole sample, HbA1c increased significantly (0.32%; 95%CI: 0.10, 0.55). In the subgroup with baseline HbA1c $\geq$ 7.5% (n=88), there was a significant reduction at 3 (-0.46%; -0.69, -0.23), 6 (-0.49%; -0.73, -0.25), and 12 months (-0.43%; -0.68, -0.19). Well-controlled patients revealed a significant 12-month worsening (0.32%; 0.18, 0.47). Self-reported severe hypoglycaemia significantly decreased compared to the previous year for the whole sample (-0.37; -0.62, -0.11). Quality of life and knowledge showed no significant differences, but satisfaction significantly increased. Adolescents demonstrated lower sensor usage time and scans per day compared to

1  
2  
3  
4 children. The reduction in HbA1c was significantly associated with device adherence. No serious adverse effects  
5 were observed. FSL use could reduce total direct costs from the NHS perspective.  
6

#### 7 **Conclusions**

8 The use of FSL in underage T1DM patients is associated with a significant reduction in severe hypoglycaemia and  
9 improved HbA1c levels in patients with poor baseline control. Findings suggest cost savings and productivity  
10 gains for caregivers. Causal evidence is limited due to the study design. Further research needed to confirm  
11 results and assess risks, especially for lower HbA1c patients.  
12

#### 13 **Strengths and limitations of this study**

- 14 - This study provides nationally contextualised real-world scientific evidence on the effectiveness, safety and  
15 costs of the flash glucose monitoring systems (FreeStyle Libre® system [FSL]) indicated for DM1 in childhood and  
16 adolescence in Spain.  
17 - The study utilized a combination of self-reported outcomes, clinical data extracted from Electronic Health  
18 Records (EHR), and device-stored information from the FSL device, which provides a robust and multifaceted  
19 assessment of the outcomes.  
20 - The uncontrolled design of the study precludes causal inferences and results from randomized trials are needed  
21 to draw definitive conclusions.  
22 - The small sample size limit the generalizability and statistical power of the findings.  
23 - The cost estimation analysis only considered direct healthcare costs from the Spanish National Health System  
24 perspective, and indirect costs were not fully taken into account, which may underestimate the overall economic  
25 impact of the intervention.  
26  
27

#### 28 **Keywords**

29 Continuous glucose monitoring, HbA1c, Type 1 diabetes, costs, Spain.  
30

31 **Word count** 4679  
32  
33  
34  
35  
36  
37  
38  
39  
40  
41  
42  
43  
44  
45  
46  
47  
48  
49  
50  
51  
52  
53  
54  
55  
56  
57  
58  
59  
60

## Introduction

Type 1 Diabetes Mellitus (T1DM) requires continuous medical monitoring, to reduce the development of vascular complications [1,2]. The early onset and chronic character of this condition increase the likelihood of reducing health-related quality of life (HRQoL) and health expectancy among young T1DM people [3]. A total of 586,000 children aged under 15 years suffer from T1DM globally [4]. In Spain, the incidence is 11.5-27.6/100,000[5], which represents a high cost to society [6].

To reduce the risk of short (metabolic) and long-term (vascular) diabetes complications, frequent determination of blood glucose levels is required. Continuous glucose monitoring systems, such as the flash glucose monitoring (FGM) systems, contribute to glycaemia monitoring, as well as to reduce the daily number of fingersticks [7], providing dynamic information to the users about their glucose level. FreeStyle Libre® (FSL), developed and marketed in Spain by Abbott Laboratories, has been indicated to measure glucose levels in the interstitial fluid in people aged over four years with T1DM. No serious adverse effects related to the use of these devices have been reported. Mild effects consist of skin problems in the area where the sensor is inserted, similar to other FGM [8,9].

In randomized trials, the FSL system has been shown to significantly reduce HbA1c levels and the frequency of hypoglycaemia in patients with T2DM, compared to the conventional finger-pricking method [10]. In T1DM, meta-analyses have revealed that the use of FSL is associated with significant HbA1c reductions from baseline to the last follow up, but in this case most studies had an uncontrolled design [11,12]. Approximately 30% of these studies included children and adolescents, which also led to obtaining significant pre-post HbA1c reductions. To the best of our knowledge, only one randomized trial has evaluated the FSL versus conventional glucose measurement in non-adults with T1DM [13]. This study included adolescents (13-20 years-old) and it found significantly higher satisfaction in the intervention group at 6 months, but no significant results on HbA1c or quality of life [13]. Therefore, the existing literature regarding the effectiveness of the FSL system in children and adolescents is of limited scientific validity.

Spain has a universal public health system, financed by taxes. The system is highly decentralized and the 17 Spanish administrative regions have their own health policy budget, which enables a tailored approach to meet the specific needs and demands of each region. The competences and portfolio of the Spanish Ministry of Health encompass a wide range of responsibilities aimed at ensuring the well-being and health of the population. These include policy development, regulation and oversight of healthcare services, public health initiatives, pharmaceutical regulation, health technology assessment and coordination of emergency responses, among others. The Spanish Network of Health Technology Assessment Agencies of the National Health System (RedETS) [14], published a report in 2016 [15], later updated in 2017 [16], devised by the Canary Islands Health Service Evaluation Department (SESCS) [17], about the effectiveness, safety and cost-effectiveness of FSL in patients with T1DM and T2DM. In 2019, the Spanish Ministry of Health decided to fund FSL for adult T1DM patients [18], and in 2020 the reimbursement was extended to any insulin-dependent patient not diagnosed with T1DM or T2DM [19].

Regarding children and adolescents with T1DM, the Spanish Ministry of Health decided to perform a post-launch evidence generation study to provide real world information on the effectiveness, safety, acceptability and potential use barriers, as well as on healthcare resources use and costs, to inform health policy decision-making on a national level in regard to coverage and public funding in these population groups [20,21]. This paper reports its results.

## Material and methods

### Study Design

Prospective multicentre pre-post study performed in 13 public hospitals throughout Spain (see **online supplemental Appendix 1**). Patients were recruited between January 2019 and March 2020, with a 12-month follow-up.

### Interventions

FSL consists of: 1) an arm sensor that measures and stores interstitial glucose levels, wearable for 14 days [22]; 2) a reader that obtains glucose readings from the sensor when placed at a distance between 1-4 cm, storing up to 90 days of glucose measures and user-entered notes. The Libre View<sup>®</sup> software and the FreeStyle Libre Link<sup>®</sup>, and LibreLinkUp<sup>®</sup> Apps enables obtaining reports with the daily patterns of glucose levels.

### Participants

Patients were eligible for inclusion if they were aged between 4 and 17, had been diagnosed with T1DM for at least one year prior to the study, were receiving intensive insulin therapy, required more than six fingersticks per day, and provided their informed consent to participate.

We excluded patients who had hypoglycaemia unawareness (judged by the clinician), were currently undergoing systemic corticosteroid treatment for more than two weeks within the last three months, had previously used or were currently using a FGM device within the last 12 months, were pregnant adolescents, had allergies to device adhesives, were unwilling to participate, lacked the necessary skills to effectively use the technology (patient/caregiver) or failed to provide informed consent.

### Setting, logistics and recruitment

The study protocol was devised by SESCO researchers with the assistance of clinical experts from all hospitals taking part, patient association and industry representatives. A centralized information system (SIEM) was developed on the Spanish Ministry of Health's intranet, accessible both for the clinical researchers responsible for recruitment, clinical examination and data collection, as well as SESCO researchers.

Clinical researchers from hospitals taking part were responsible for recruiting, informing and training both patients and caregivers. They collected self-reported data using various measurement scales and extracted clinical information from the electronic health record (EHR) at baseline, 3, 6, and 12 months. In addition, they retrieved the stored information from the FSL device during the follow-up phase (3, 6, and 12 months) on the SIEM platform. SESCO researchers were responsible for coordinating the project and supervising data collection, monitoring quality assurance and data validation, analyses and reporting.

Interested Spanish autonomous communities designated the hospitals they wished to take part in the study. Thirteen public hospitals were included between January 2019 and May 2020, distributed over eight Spanish autonomous communities.

### Endpoints

#### Effectiveness

The primary endpoint was the change in HbA1c level from baseline to follow up. Secondary endpoints included: 1) data extracted from the EHR at baseline and 3, 6 and 12 months: number of severe hypoglycaemia events (defined as those that require help from another person), ketoacidosis episodes, number of hospital admissions and mortality; and 2) self-reported outcomes evaluated at baseline and at 12 months follow-up, by means of the EQ-5D-Y questionnaire [23]; with five categories, reporting the level of severity, ranging from 1 ("I have no problems") to 5 ("I have a lot of problems") in terms of mobility, self-care, activities of daily living, pain/discomfort and anxiety/depression. Furthermore, a visual analogue scale (VAS) measured self-perceived general health, ranging from "0" (worst health status) to "100" (best health status).

1  
2  
3  
4 Knowledge about diabetes treatment was measured by means of a modified version of the questionnaire devised  
5 by Mitchell et al. [24]. This includes 14 items evaluating basic theoretical knowledge about the management of  
6 T1DM and its treatment, as well as the patient/caregiver's self-perceived involvement in self-care. The final score  
7 is the sum of correct answers (range 0-14). To measure satisfaction with treatment, we used the six-item  
8 Diabetes Treatment Satisfaction Questionnaire (DTSQ) [25]. Response options range from 0 (very dissatisfied) to  
9 6 (very satisfied) (range 0-36). Another two items measured the perceived frequency of hyperglycaemia and  
10 hypoglycaemia on a scale from 0 (never perceived) to 6 (most of the time).  
11  
12

### 13 **Safety**

14 Patients' self-reported device-related adverse events were collected at 3, 6 and 12-months of follow-up.  
15  
16

### 17 **Adherence**

18 To measure device adherence, the following variables were evaluated: 1) Number of daily scans; 2) Sensor usage  
19 time (percentage); and 3) Number of sensors used. These data were collected throughout the follow-up phase  
20 by means of the information stored in the device.  
21  
22

### 23 **Use of healthcare resources**

24 Data were extracted from the EHR at baseline and at 12-months of follow-up on: 1) Number of hospitalizations;  
25 2) Number of clinic visits (endocrinology, nursing, primary care/paediatrics, emergency); 3) Number of HbA1c  
26 assays; 4) Number of test strips and lancets used; and 5) Absenteeism from work (number of days the caregiver  
27 was absent from work due to problems related to the child's T1DM).  
28

29 In addition to these measures, information on age, sex, body mass index (BMI), time since diagnosis, presence  
30 of comorbidities and pubertal stage according to the Tanner scale [26], which classifies patients into 5 stages  
31 ranging from stage 1 (childhood) to 5 (adult), was systematically collected.  
32  
33

### 34 **Sample Size Calculation**

35 We estimated a sample size requirement of 43 participants to detect a minimal clinically relevant change in  
36 HbA1c of 0.5% [27], assuming 95% confidence level, 80% power, a HbA1c standard deviation of 1, a pre-post  
37 correlation of 0.5 (conservative assumption), and a loss rate of 20%. In addition to the main effect in the whole  
38 sample, we were also interested in the effect of the intervention on subgroups defined by their baseline HbA1c  
39 level (greater or less than 7.5%), and age (<12 vs. ≥12 years-old). However, the analysis of interactions requires  
40 larger sample sizes to attain statistical power, which was not feasible within the study's time limits. Therefore,  
41 we aimed to multiply the sample at least by 4 (n=172) to increase the statistical power as much as possible.  
42  
43

### 44 **Statistical analysis**

45 Means and standard deviation (SD) were estimated for continuous variables, and count and percentage for  
46 qualitative variables. Baseline characteristics of patients were compared using student-*t*, Pearson chi-square,  
47 Fisher's exact test or Cochran Q, according to the type of variables.  
48

49 Mixed regression models with repeated measures were used, adjusting for the interaction between time and  
50 baseline HbA1c (dichotomous variable) and age group, time and its main effects. The duration of the disease and  
51 the existence of comorbidities were included as covariates. A linear link function was used for continuous  
52 dependent variables, a logistic function for dichotomous dependent variables and a Poisson function for count  
53 dependent variables. In the models with significant interaction, mixed regression models were performed for  
54 each interaction subgroup.  
55

56 The relationship between adherence to the device and HbA1c reduction was analysed using two mixed linear  
57 regression models, whose independent variables were the percentage of time using the sensor (12 months) and  
58  
59  
60

1  
2  
3  
4 the number of monthly scans; basal HbA1c level was introduced as a covariable. Intercept was introduced as a  
5 random effect in all models.

6 For missing values during follow-up, a comparability analysis was conducted between participants lost to follow-  
7 up and those who remained, prior to performing multiple imputation by chained equations using Stata version  
8 15.0. The details of this comparability analysis and the imputation model can be found in **online supplemental**  
9 **Appendix 2**.

10 A level of 0.05 was considered statistically significant. Analyses were performed with the statistical software  
11 Stata V.15.0 [28] and SPSS V.20.0 [29].  
12  
13

#### 14 **Cost estimation**

15 Intervention costs were estimated from the Spanish National Health System (NHS) perspective, including only  
16 direct healthcare costs during the 12 months of the study. The healthcare resources collected in this study,  
17 together with the corresponding unit costs and their information sources, can be found in **Table A1 in online**  
18 **supplemental Appendix 3**. Costs were expressed as 2021 euros (€). When necessary, we adjusted for the  
19 consumer price index (CPI), using the Spanish Office of National Statistics (INE) – the INE's income conversion  
20 tool [30]. The sensor's unit costs (€43.27) were not included in our analysis because it was donated by Abbot.  
21 Therefore, only the difference in costs before and after use of the device was analysed without taking its cost  
22 into account, since this depends on the manufacturing company's economic offer.

23 Unit cost of test strips and lancets were estimated with the average costs of information provided by different  
24 regional health services of the Spanish NHS. Total costs were estimated multiplying the collected data on health  
25 resources used by their respective unit costs, and then added.

26 Descriptive statistics are presented for total costs aggregated and broken down into: primary care visits (nursing  
27 and physicians), emergency visits (hospital and non-hospitals), specialist physicians visits, laboratory tests (HbA1c  
28 assay) and monitoring instruments (test strips and lancets).

29 Given the nature of the costs and their non-normal nature, confidence intervals were estimated using a non-  
30 parametric bootstrapping method [31]. Analyses were performed using the statistical software SPSS V.20.0 [29]  
31 with the help of Microsoft Excel.

32 In addition, although the social perspective was not taken into account in this estimate, indirect technology costs  
33 were reported using the human capital theory, i.e. considering the costs attributed to productivity losses of the  
34 parents or caregivers of the child with T1DM before and after one year of using the FSL.

35 To estimate the cost per day of absenteeism, the cost per hour worked in Spain published by the Statistical Office  
36 of the European Union (Eurostat) [32] was multiplied by the average number of daily working hours worked in  
37 Spain published in the INE's Labour Force Survey (LFS) [33].  
38  
39  
40  
41  
42  
43  
44  
45  
46  
47  
48  
49  
50  
51  
52  
53  
54  
55  
56  
57  
58  
59  
60

## Results

A total of 165 patients were initially registered for the study. However, nine patients were subsequently excluded as they did not meet the study's inclusion criteria (see flow-chart in **Figure 1**). Therefore, the final analysis included a total of 156 patients.

### Figure 1. Flow-chart

Patients' baseline characteristics, are shown in **Table 1**, according to subgroups by level of metabolic control and age. There was a higher percentage of participants in stage 1 and 5 in the subgroup with worse glycaemic control ( $P=0.02$ ). In this subgroup, the mean HbA1c value was 8.7%; with 6.8% ( $P<0.001$ ) in the well-controlled group.

Descriptive statistics obtained at each time point for the total sample and subgroups for each outcome measure can be found in **online supplemental Appendix 4**.

| Table 1. Baseline characteristics of patients according to baseline HbA1c control and age groups                                                                                                                                                                                                                                                                                                                            |                  |                       |                        |             |                     |                      |                 |
|-----------------------------------------------------------------------------------------------------------------------------------------------------------------------------------------------------------------------------------------------------------------------------------------------------------------------------------------------------------------------------------------------------------------------------|------------------|-----------------------|------------------------|-------------|---------------------|----------------------|-----------------|
|                                                                                                                                                                                                                                                                                                                                                                                                                             | Total<br>(n=156) | HbA1c <7.5%<br>(n=68) | HbA1c ≥7.5 %<br>(n=88) | P           | <12 years<br>(n=53) | ≥12 years<br>(n=103) | P               |
| <b>Anthropometric characteristics</b>                                                                                                                                                                                                                                                                                                                                                                                       |                  |                       |                        |             |                     |                      |                 |
| Sex (male) n (%)                                                                                                                                                                                                                                                                                                                                                                                                            | 86 (55.1)        | 35 (51.5)             | 51 (58)                | .419        | 28 (52.8)           | 58 (56.3)            | .679            |
| Age (years), mean (SD)                                                                                                                                                                                                                                                                                                                                                                                                      | 12.6 (3.2)       | 12.7 (2.84)           | 12.49 (3.39)           | .735        | NA                  | NA                   | NA              |
| Children < 12 years, n (%)                                                                                                                                                                                                                                                                                                                                                                                                  | 53 (34)          | 21 (30.9)             | 32 (36.4)              | .474        | NA                  | NA                   | NA              |
| BMI (kg/m <sup>2</sup> ), mean (SD)                                                                                                                                                                                                                                                                                                                                                                                         | 20.3 (4.1)       | 20.18 (3.34)          | 20.39 (4.54)           | .754        | NA                  | NA                   | NA              |
| <b>Pubertal status, n (%)</b>                                                                                                                                                                                                                                                                                                                                                                                               |                  |                       |                        | <b>.022</b> |                     |                      | <b>&lt;.001</b> |
| I                                                                                                                                                                                                                                                                                                                                                                                                                           | 51 (32.7)        | 19 (27.9)             | 32 (36.4)              |             | 44 (83)             | 7 (6.8)              |                 |
| II                                                                                                                                                                                                                                                                                                                                                                                                                          | 14 (9.0)         | 9 (13.2)              | 5 (5.7)                |             | 4 (7.5)             | 10 (9.7)             |                 |
| III                                                                                                                                                                                                                                                                                                                                                                                                                         | 20 (12.8)        | 7 (10.3)              | 13 (14.8)              |             | 4 (7.5)             | 16 (15.5)            |                 |
| IV                                                                                                                                                                                                                                                                                                                                                                                                                          | 23 (14.7)        | 16 (23.5)             | 7 (8)                  |             | 0 (0)               | 23 (22.3)            |                 |
| V                                                                                                                                                                                                                                                                                                                                                                                                                           | 48 (30.8)        | 17 (25)               | 31 (35.2)              |             | 1 (1.9)             | 47 (45.6)            |                 |
| <b>Clinical characteristics</b>                                                                                                                                                                                                                                                                                                                                                                                             |                  |                       |                        |             |                     |                      |                 |
| Duration of diabetes (years), mean (SD)                                                                                                                                                                                                                                                                                                                                                                                     | 5.65 (3.39)      | 5.52 (3.35)           | 5.75 (3.44)            | .671        | 4.06 (2.4)          | 6.47 (3.54)          | <b>&lt;.001</b> |
| HbA1c, mean (SD)                                                                                                                                                                                                                                                                                                                                                                                                            | 7.86 (1.36)      | 6.82 (0.36)           | 8.65 (1.31)            | NA          | 7.83 (1.17)         | 7.87 (1.45)          | .87             |
| HbA1c <7.5%, n (%)                                                                                                                                                                                                                                                                                                                                                                                                          | 68 (43.6)        | NA                    | NA                     |             | 21 (39.6)           | 47 (45.6)            | .474            |
| Presence of comorbidities, n (%)                                                                                                                                                                                                                                                                                                                                                                                            | 50 (32.1)        | 27 (39.7)             | 23 (26.1)              | .072        | 17 (32.1)           | 33 (32)              | .996            |
| <b>Comorbidities, n (%)</b>                                                                                                                                                                                                                                                                                                                                                                                                 |                  |                       |                        |             |                     |                      |                 |
| Asthma                                                                                                                                                                                                                                                                                                                                                                                                                      | 6 (3.8)          | 5 (7.4)               | 1 (1.1)                | .199        | 1 (1.9)             | 5 (4.9)              | .65             |
| Coeliac Disease                                                                                                                                                                                                                                                                                                                                                                                                             | 8 (5.1)          | 6 (8.8)               | 2 (2.3)                | .261        | 5 (9.4)             | 3 (2.9)              | .102            |
| Thyroiditis                                                                                                                                                                                                                                                                                                                                                                                                                 | 18 (11.5)        | 12 (17.6)             | 6 (6.8)                | .178        | 6 (11.3)            | 12 (11.7)            | .941            |
| ADHD                                                                                                                                                                                                                                                                                                                                                                                                                        | 4 (2.6)          | 1 (1.5)               | 3 (3.4)                | .322        | 1 (1.9)             | 3 (2.9)              | .999            |
| Others                                                                                                                                                                                                                                                                                                                                                                                                                      | 19 (12.2)        | 7 (10.3)              | 12 (13.6)              | .057        | 5 (9.4)             | 14 (13.6)            | .369            |
| ADHD = Attention-Deficit/Hyperactivity Disorder; BMI = Body mass index; HbA1c = Glycated haemoglobin; NA = Not Applicable; SD = Standard deviation.                                                                                                                                                                                                                                                                         |                  |                       |                        |             |                     |                      |                 |
| Other comorbidities: allergy, obesity, iron deficiency anaemia, unilateral anorchia, immunoglobulin A (IgA) deficiency, intellectual disability, epilepsy, hypercholesterolaemia, sensorineural hearing loss, migraines, idiopathic hypercalciuria, ovarian teratoma, nephrocalcinosis, psoriasis, allergic rhinitis, vasovagal syncope, Tourette's syndrome, eating disorder (ED) and obsessive-compulsive disorder (OCD). |                  |                       |                        |             |                     |                      |                 |



## Effectiveness

### Glycated haemoglobin

In the entire sample, there was a significant increase in HbA1c (0.32%,  $P<0.001$ ). The interaction between time and the baseline HbA1c group was statistically significant at 3, 6 and 12 months ( $P<0.001$ ) (**Table 2**). In the subgroup analysis, participants with baseline HbA1c<7.5% revealed an increase of 0.32% (0.18 to 0.47) in HbA1c at 12 months (with respect to baseline) ( $P<0.001$ ), without exceeding, on average, the threshold of poor control. Patients with poorly controlled baseline status had a statistically significant reduction in HbA1c at all follow-ups: B=-0.46% (-0.69 to -0.23;  $P<0.001$ ), B=-0.49% (-0.73 to -0.25;  $P<0.001$ ), and B=-0.43% (-0.68 to -0.19;  $P=0.001$ ), at 3, 6 and 12 months, respectively (**Table 2**). On average, this reduction did not attain the threshold of poor control.

| Variable                                                        | Glycosylated haemoglobin |                 |                         |                 |                         |                 |
|-----------------------------------------------------------------|--------------------------|-----------------|-------------------------|-----------------|-------------------------|-----------------|
|                                                                 | Total sample (n=156)     |                 | HbA1c <7.5% (n=68)      |                 | HbA1c ≥7.5% (n=88)      |                 |
|                                                                 | B (95%CI)                | P               | B (95%CI)               | P               | B (95%CI)               | P               |
| <b>Time</b>                                                     |                          |                 |                         |                 |                         |                 |
| M3 (ref: M0)                                                    | 0.03<br>(-0.18; 0.24)    | .765            | 0.03<br>(-0.09; 0.16)   | .611            | -0.46<br>(-0.69; -0.23) | <b>&lt;.001</b> |
| M6 (ref: M0)                                                    | 0.1<br>(-0.11; 0.32)     | .344            | 0.10<br>(-0.03; 0.23)   | .115            | -0.49<br>(-0.73; -0.25) | <b>&lt;.001</b> |
| M12 (ref: M0)                                                   | 0.32<br>(0.10; 0.55)     | <b>.005</b>     | 0.32<br>(0.18; 0.47)    | <b>&lt;.001</b> | -0.43<br>(-0.68; -0.19) | <b>.001</b>     |
| <b>Duration of T1DM</b>                                         | 0.05<br>(0.007; 0.09)    | <b>.020</b>     | -0.005<br>(-0.04; 0.03) | .762            | 0.09<br>(0.02; 0.15)    | <b>.011</b>     |
| <b>Presence of comorbidities</b>                                | -0.10<br>(-0.39; 0.18)   | .477            | 0.09<br>(-0.13; 0.30)   | .439            | -0.22<br>(-0.70; 0.26)  | .372            |
| <b>Age group: ≥12 years (ref: &lt;12 years)</b>                 | 0.17<br>(-0.12; 0.47)    | .253            | 0.09<br>(-0.15; 0.32)   | .473            | 0.26<br>(-0.21; 0.73)   | .274            |
| <b>Baseline HbA1c group: ≥7.5% (ref: HbA1c &lt;7.5%)</b>        | 1.81<br>(1.50; 2.13)     | <b>&lt;.001</b> |                         |                 |                         |                 |
| <b>Time*Baseline HbA1c Group (ref: M0 &amp; HbA1c &lt;7.5%)</b> |                          |                 |                         |                 |                         |                 |
| M3 & HbA1c ≥7.5%                                                | -0.49<br>(-0.78; -0.21)  | <b>&lt;.001</b> |                         |                 |                         |                 |
| M6 & HbA1c ≥7.5%                                                | -0.59<br>(-0.88; -0.29)  | <b>&lt;.001</b> |                         |                 |                         |                 |
| M12 & HbA1c ≥7.5%                                               | -0.76<br>(-1.05; -0.46)  | <b>&lt;.001</b> |                         |                 |                         |                 |
| <b>Intercept</b>                                                | 6.75<br>(6.41; 7.09)     | <b>&lt;.001</b> | 6.73<br>(6.50; 6.96)    | <b>&lt;.001</b> | 8.53<br>(8.12; 8.94)    | <b>&lt;.001</b> |

CI = Confidence Interval; HbA1c = Glycosylated Haemoglobin; M = Month; T1DM = Type 1 Diabetes Mellitus.

### Severe hypoglycaemic (SH) events

The reduction in the number of self-reported events was significant at 12 months  $\beta=-0.37$  (-0.62 to -0.11;  $P=0.004$ ) (**Table 1 in online supplemental Appendix 5**). Although the interaction with the level of HbA1c at baseline was not statistically significant ( $P=0.117$ ), the descriptive statistics (**online supplemental Appendix 4**) in patients with controlled HbA1c at baseline show a reduction in the mean number of events; with an increase in the poorly controlled subgroup.

SH events recorded in the EHR show significantly lower rates compared to self-reported events (**online supplemental Appendix 4**), without significant main or interaction effects (**Table 1 in online supplemental**

**Appendix 5).** The rate of SH events was significantly higher in the subgroup with poor HbA1c control ( $P=0.014$ ) (Table 1 in online supplemental Appendix 5).

#### Diabetic ketoacidosis and other serious adverse events

In the follow-up phase, six mild or moderate ketoacidosis events were recorded at three (2), six (1), and 12 months (3), respectively; and four serious adverse events at three months (two admissions and one episode of ketosis without acidosis due to bubbles in the system); and at six months (one admission). No events were observed at 12-month follow-up. No patient died during follow-up.

#### Health-related quality of life

At 12 months follow-up, the percentages of severe limitations for mobility, self-care, daily activities, anxiety and depression were similar to baseline values. However, a reduction was observed in the percentage of patients who self-reported pain (online supplemental Appendix 4).

VAS score (Table 1 in online supplemental Appendix 5) did not show a significant change in the whole sample, and the interaction with baseline HbA1c values was slightly above the statistical significance level ( $P=0.061$ ). In poorly controlled patients, VAS scores were significantly reduced at 12 months compared to the baseline score  $B=-6.03$  (-9.66 to -2.41;  $P=0.001$ ). In the subgroup with good basal metabolic control, no statistically significant findings were observed.

#### Knowledge about T1DM

There was no significant change in patients' knowledge, nor a significant interaction with baseline HbA1c. Patients with worse basal metabolic control revealed a significantly lower score compared to well-controlled patients:  $B=-1.27$  (-1.89 to 0.65;  $P<0.001$ ) (Table 1 in online supplemental Appendix 5).

#### Satisfaction with treatment

General satisfaction with treatment significantly increased 3.1 points at 12 months of follow-up (0.99 to 5.23;  $P=0.004$ ) (Table 1 in online supplemental Appendix 5). There were no statistically significant differences in self-perceived hypo- and hyperglycaemia. For the latter, a higher score of 1.06 points (in a range of 0 to 6) was observed, in patients with  $HbA1c \geq 7.5\%$ , compared to those with good control (0.60 to 1.52;  $P<0.001$ ) (Table 1 in online supplemental Appendix 5).

#### Safety

Mild adverse events related to the device during follow-up phases had a 3.1% and 6.6% reduction for skin reactions and discomfort or pain, respectively. However, these were not statistically significant (Table 3).

| Table 3. Mild adverse effects caused by the sensor |                     |                     |                      |          |                                       |
|----------------------------------------------------|---------------------|---------------------|----------------------|----------|---------------------------------------|
|                                                    | 3 months<br>(n=150) | 6 months<br>(n=136) | 12 months<br>(n=128) | <i>P</i> | Differences 12–3 months,<br>% (95%CI) |
| Skin reactions, n (%)                              | 21 (14.0)           | 16 (11.8)           | 14 (1.9)             | .542     | -3.1% (-25.2; 19.0)                   |
| Discomfort or pain, n (%)                          | 17 (11.3)           | 13 (9.6)            | 6 (4.7)              | .210     | -6.6% (-29.3; 16.1)                   |
| Other minor events, n (%)                          | 3 (2.0)             | 2 (1.5)             | 2 (1.6)              | .999     | -0.4% (-23.9; 23.1)                   |

Among the other events, there were minor haemorrhages when the sensor was positioned and wounds in the insertion area. In one case, the patient lost consciousness because of the bleeding.  
CI = Confidence Interval.

#### Adherence

Time of sensor use (Table 2 in online supplemental Appendix 5) significantly increased at 6.4% at 12 months of follow-up (1.12 to 11.72;  $P=0.02$ ), compared to three months. Longer duration of T1DM ( $P=0.008$ ), and age older than 12 years ( $P=0.003$ ), significantly reduced sensor use.

1  
2  
3  
4 A reduction in the mean number of daily scans at three months occurred in poorly controlled patients  $B=-1.92$  (-  
5 3.52 to -0.31;  $P=0.019$ ). Those aged over 12 underwent an average of four fewer scans than those aged under 12  
6 years  $B=-3.92$  (-5.4 to -2.43;  $P<0.001$ ) (**Table 2 in online supplemental Appendix 5**).

7  
8 Controlled patients revealed an increase in the mean number of sensors use at 12 months of follow-up  $B=7$  (5.85  
9 to 8.06;  $P<0.001$ ); also increasing in poorly controlled patients by  $B=1.6$  (0.48 to 2.7;  $P=0.005$ ) at 6 months, and  
10  $B=9.4$  (8.25 to 10.5;  $P<0.001$ ) at 12 months (**Table 2 in online supplemental Appendix 5**).

11 The percentage of time of use was statistically significantly related to a lower HbA1c level at 12 months ( $B=-0.01$ ;  
12  $P=0.013$ ), as was the number of scans ( $B=-0.21$ ;  $P<0.001$ ).

### 13 14 15 16 **Costs estimation**

17 The estimated total annual costs per patient are shown in **Table A2 (online supplemental Appendix 3)**.  
18 Intervention short-term costs from an NHS perspective reveal that specialist visits and test strips and lancets  
19 costs account for a significant part of total costs (38% and 41%, respectively), with an average annual cost per  
20 patient of €415.48 and €447.25 for specialist visits and strips and lancets, respectively.

21 Total annual costs before and after use of the FSL system can be found in **Figure A1 (online supplemental**  
22 **Appendix 3)**. All measured costs decreased after use of the device throughout 12 months follow-up, with the  
23 most striking difference in costs related to test strips and lancets use, an annual difference of €856.68 per patient.  
24 This information is outlined in **Table A3 (online supplemental Appendix 3)**. The annual average number of test  
25 strips per patient decreased from 2686.02 strips per year before the use of the FSL, to 883.98 strips per year  
26 after its use. The difference in the annual average use of lancets per patient also reduced from 1366.41, before  
27 FSL use, to 615.94, after its use.

28 Furthermore, a decrease in total annual costs due to productivity losses of parents/caregivers of minor patients  
29 with T1DM was observed after the use of FSL (€545.67 versus €262.73) as shown in **Table A3 (online**  
30 **supplemental Appendix 3)**.

### 31 32 33 34 **Patient and public involvement**

35 There was no patient involvement in the design of this study. Clinical experts from all participant hospitals,  
36 representatives of patient associations and the industry took part in drawing up the protocol. We undertook with  
37 healthcare professionals to share the results with them in an easy-to-understand way.  
38  
39  
40  
41  
42  
43  
44  
45  
46  
47  
48  
49  
50  
51  
52  
53  
54  
55  
56  
57  
58  
59  
60

## Discussion

Glucose monitoring devices can help people with T1DM monitor their glycaemia levels and reduce the frequency and/or severity of acute disease-complication rates, thus improving their HRQoL and life expectancy [34]. Two meta-analyses of case series on the effectiveness of the FSL revealed statistically significant HbA1c reductions in children/adolescents with poor HbA1c monitoring (7.5%-9.6%, except two studies with 7.1% and 7.4%) of -0.54% (n=447) [35] and -0.29% (n=959) [36], although the effect was highly variable across studies. Our study only provides a statistically significant reduction of HbA1c in the group with poor baseline monitoring, (-0.46%, -0.49% and -0.35%), at 3, 6 and 12 months, respectively. Conspicuously, patients with basal controlled HbA1c levels revealed a significant 12-month worsening higher than 0.30%. Another case series in Spain (n=145) [37], with limited follow up to three months, also detected a reduction in patients with HbA1c $\geq$ 7.5% (-0.41,  $P=0.004$ ), and a statistically significant increase in well-monitored patients, i.e. a worsening in HbA1c levels (0.23,  $P=0.03$ ). Other studies [35, 38], reported a moderating effect of baseline HbA1c levels on subsequent reduction, with greater improvements in poorly controlled patients of all ages. However, except the aforementioned Spanish study [37], there are no known studies whose results indicate a significant worsening in well-controlled patients.

Our study also revealed a significant reduction in the number of self-reported SH events for the whole sample (-0.37), but not in the number of patients with at least one event. The interaction effect with baseline HbA1c level was not statistically significant for these two variables ( $P=0.117$  and  $P=0.108$ , respectively). However, these analyses were underpowered and the descriptive statistics suggest different subgroup effects, although none was statistically significant. The reduction of self-reported SH events occurred in patients with correct HbA1c monitoring at baseline (0.39), whereas in the basally uncontrolled group, an increase was self-reported (0.37 more); together with an important increase in the rate of patients with at least one event (from 26% to 38%). These results could be reflecting the trade-off faced by patients with T1DM between the reduction in glucose levels and the associated risk of increasing the risk of hypoglycaemic events. Patients with higher HbA1c levels could have attained the reduction target, increasing the risk of SH; whereas some of those patients in need of reducing hypoglycaemic events, could increase their HbA1c levels. This interpretation is speculative since the commented results on self-reported SH were not statistically significant and underpowered, but it would help account for the unexpected significant worsening in self-perceived general health observed in the subgroup of poor baseline HbA1c monitoring. Contrary to the HbA1c improvement attained in our study, without observable effects on self-perceived HRQoL, suffering an SH event is a salient experience that may impact this self-perception.

Other studies [37] have also reported a significant and clinically meaningful improvement in the rate of SH events (from 4.2 to 0.2 events/100 patients-year). However, their results are not reported separately according to basal levels of metabolic control. The largest case series published to date with children and adolescents [39], and with the longest follow-up (12 months), also revealed a statistically significant reduction of SH events (53%,  $P=0.012$ ) for the whole sample, with no changes in HbA1c.

The interaction of the intervention with the age group (<12 vs.  $\geq$ 12 years-old) was not statistically significant in any case. However, descriptive statistics reveal different non-significant trends among subgroups, with positive results only for younger participants: -0.26% vs. -0.05% (HbA1c), -1.06 vs. 0.68 (SH events) and -4.2% vs. 10.5% (people with one or more SH). Adolescents revealed significantly lower sensor usage time and scans per day than children, similar to the results observed in previous studies [40-42]. Regardless of these findings, their adherence was good, above 78% of the time at each successive evaluation. However, the only randomized controlled trial to date evaluating the effectiveness of FSL in adolescents (aged 13-20 years, with HbA1c $\geq$ 9.0%) [13], did not reveal any statistically significant differences in HbA1c reduction compared to traditional self-monitoring at six months. Therefore, significant uncertainty remains in regard to the effects of FSL in adolescents.

Despite the improvement in the degree of metabolic control that occurred in our study sample of patients with worse baseline HbA1c levels, no statistically significant improvement was observed in their knowledge of disease self-management. Device adherence was significantly related to the reduction of HbA1c, a result usually

1  
2  
3  
4 observed in the literature on glucose monitoring devices [40-42]. The same can be said about treatment  
5 satisfaction [43,44], which improved in the whole sample.

6 In regard to safety, no serious adverse effects were observed, a result consistent with the literature on  
7 glucose monitoring devices in general [9]. The number of patients showing mild adverse events at three months  
8 was reduced at the end of follow-up to 18%, resulting in two losses at six months follow-up due to skin reaction  
9 to the sensor and another two at 12 months due to discomfort with the sensor.

10 In terms of costs analysis as observed in the international literature, our results showed that T1DM patients  
11 consume less healthcare resources using FSL [45]. Fundamentally, a striking decrease was observed in costs  
12 attributed to reactive strips and lancets, where an annual difference of €856.68 per patient was obtained. A  
13 decrease in total indirect annual costs due to productivity losses of parents/carers of T1DM patients, was also  
14 observed (€545.67 versus €262.73).

15  
16  
17  
18 The main limitation of this study lies in its uncontrolled design, which precludes comparison with an untreated  
19 group. Therefore, an inference of causality regarding the introduction of the FLS is not possible, because other  
20 factors such as child developmental growth, potential changes in target treatment or insulin administration  
21 methods could impact the observed changes. A “novelty effect”, related to the use of a technological device  
22 could also introduce a motivation bias that could affect self-management habits. Another relevant limitation is  
23 the limited sample size to analyse interaction effects, even when we increased the recruited sample fourfold. By  
24 the time of study execution, the FSL was already financed and introduced in some hospitals taking part and a  
25 large portion of the target population was already using it. This scenario was an important recruitment obstacle  
26 to enlarge sample size. Our conclusions to be drawn are, therefore, limited by the low statistical power for  
27 interaction analyses and rare events such as severe hypoglycaemia. All these limitations imply a low quality of  
28 the evidence.

29  
30  
31  
32 The start-up of a monitoring study has been used to collect data on the use of resources and make initial  
33 estimates of the cost of the intervention. Therefore, our cost analysis was a secondary endpoint and  
34 complementary to this study’s primary endpoint and it has limitations. First, our analysis has not taken into  
35 account the costs attributable to the possible adverse effects arising from the use of FSL and it has assumed that  
36 possible failures of the device will be resolved at no additional cost to the Spanish NHS. Moreover, it was not  
37 possible to estimate the costs related to hospitalization of the patients since the number of days of each  
38 hospitalization was not recorded in this study. However, the extremely low number of total hospitalizations  
39 during the monitoring study indicates that including this cost in the estimate would not have produced  
40 substantial changes in the results. Finally, it must be taken into account that the unit cost of the FSL sensor has  
41 not been considered since it was delivered free of charge to the study participants.

42  
43  
44  
45 To the best of our knowledge, this is the first comparative costs analysis study of FSL use in children and  
46 adolescents with T1DM in Spain using observational data in an actual use scenario. Therefore, although a cost-  
47 effectiveness analysis could not be performed in this study, due to the absence of a comparator, our results may  
48 contribute to inform future cost-effectiveness studies of FSL in Spain.

49  
50  
51 In conclusion, our results suggest that the use of FSL in young T1DM patients significantly reduces the rate  
52 of SH events, and improves HbA1c levels in patients with poor baseline monitoring. However, futures studies  
53 should confirm whether these benefits could be at the cost of worsening severe hypoglycaemia in patients with  
54 lower HbA1c. No serious adverse events related to FSL were observed. The results also suggest that the use of  
55 FSL in young patients with T1DM leads to a decrease in monitoring costs. In addition, the use of FSL reduces costs  
56 attributable to lost productivity of parents/caregivers. These outcomes correspond to low-quality evidence,  
57 mainly due to the study’s uncontrolled design, in addition to the low statistical power in the case of rare  
58 complications such as SH.

1  
2  
3  
4 Based on these results and other information sources (i.e., international research and clinical expert advice),  
5 the Spanish Ministry of Health has decided to reimburse the FreeStyle Libre (FSL) for children and adolescents  
6 aged 4-17 years old with Type 1 diabetes who undergo intensive insulin therapy (multiple daily injections or  
7 insulin pump) and require at least six fingerstick blood glucose self-monitoring tests a day.  
8  
9  
10  
11  
12  
13  
14  
15  
16  
17  
18  
19  
20  
21  
22  
23  
24  
25  
26  
27  
28  
29  
30  
31  
32  
33  
34  
35  
36  
37  
38  
39  
40  
41  
42  
43  
44  
45  
46  
47  
48  
49  
50  
51  
52  
53  
54  
55  
56  
57  
58  
59  
60

For peer review only

## Footnotes

**Collaborators:** The Health Professional Group included the following members (in alphabetical order): Amparo González Vergaz (Hospital Severo Ochoa), Ana María Prado Carro (Complejo Hospitalario Universitario A Coruña), Anunciación Beisti Ortego (Fundación Hospital Calahorra), Ariadna Campos Martorell (Hospital Universitari Vall D'hebron), Atilano José Carcavilla Urqui (Hospital Universitario La Paz), Cristina Amparo Del Castillo Villaescusa (Hospital Universitario Dr. Peset Aleixandre), Estela Gil Poch (Hospital Universitario de Badajoz), Francisco Javier Arroyo Diez (Hospital Universitario de Badajoz), Gemma Novoa Gómez (Complejo Hospitalario Universitario de Ourense), Isabel González Casado (Hospital Universitario La Paz), Juncal Martínez Ibáñez (Fundación Hospital Calahorra), Laura Cuadrado Piqueras (Fundación Hospital Calahorra), Leticia Reis Iglesias (Complejo Hospitalario Universitario de Ourense), Lucia Garzón Lorenzo (Hospital Universitario 12 De Octubre), Luis Salamanca Fresno (Hospital Universitario La Paz), María Asunción Martínez Brocca (Hospital Universitario Virgen Macarena), María Aurea Rodríguez Blanco (Hospital Da Barbanza), María Del Mar Martínez López (Hospital Universitario 12 De Octubre), María Jesús Ferreiro Rodríguez (Complejo Hospitalario Universitario de Ourense), María Ruiz del Campo (Hospital San Pedro), Nerea Itza Martín (Hospital Universitario La Paz), Patricia García Navas (Hospital San Pedro), Rebeca García García (Hospital Universitario Central de Asturias).

**Contributorship statement:** YAP, ARS, LPP and PSA initiated the study. HGP did the acquisition of data. HGP, ARS, CVN and YRF contributed to the analysis and interpretation of data. HGP did the statistical analyses. HGP, ARS, CVN YAP and YRF wrote the first draft of the manuscript. HGP, ARS, YRF, CVN, YAP, LGP, MAGB, LPP AND PSA critically revised the manuscript and approved the final version. HGP is responsible for the overall content as the guarantor and accepts full responsibility for the work and/or the conduct of the study, had access to the data, and controlled the decision to publish.

**Competing interests:** None declared.

**Funding:** This work was financed by the Spanish Ministry of Health, Consumer Affairs and Social Welfare in the framework of activities developed by the Spanish Network of Agencies for Health Technology Assessment for the Spanish National Health Service.

**Data sharing statement:** Data are not publicly available. Data are available upon reasonable request.

**Ethics approval statement**

**Patient consent for publication:** Not applicable.

**Ethics approval:** All participants provided written informed consent. The scientific and ethics committees approved the study protocol (Hospital Universitari Vall d'Hebron, ID-RTF065).

## References

1. Lucier J, Weinstock RS, Doerr C. Diabetes Mellitus Type 1 (Nursing). 2021 Jul 26. In: StatPearls [Internet]. Treasure Island (FL): StatPearls Publishing; 2022 Jan-. PMID: 33760510
2. Golden SH, Sapir T. Methods for insulin delivery and glucose monitoring in diabetes: summary of a comparative effectiveness review. *J. Manag. care Pharm.* 2012;18(6):S1 17
3. Miranda Velasco MJ, Domínguez Martín E, Arroyo Díez FJ, Méndez Pérez P, González de Buitrago Amigo J. Calidad de vida relacionada con la salud en la diabetes mellitus tipo 1. *An. Pediatría.* 2012 Nov;77(5):329–33
4. International Diabetes Federation. IDF diabetes atlas. 8.aed.Bruselas, Bélgica; 2017.2
5. Conde Barreiro S, Rodríguez Rigual M, Bueno Lozano G, et al. Epidemiología de la diabetes mellitus tipo 1 en menores de 15 años en España. *An. Pediatría.* 2014;81(3):189.e1 189.e12
6. Crespo C, Brosa M, Soria-Juan A, Lopez-Alba A, López-Martínez N, Soria B. Costes directos de la diabetes mellitus y de sus complicaciones en España (Estudio SECCAID: Spain estimated cost Ciberdem-Cabimer in Diabetes). *Av. en Diabetol.* 2013 Nov;29(6):182–9
7. Klonoff DC, Ahn D, Drincic A. Continuous glucose monitoring: A review of the technology and clinical use. *Diabetes Res. Clin. Pract.* 2017;133:178 92
8. Marsters BL, Boucher SE, Galland BC, et al. Cutaneous adverse events in a randomized controlled trial of flash glucose monitoring among youth with type 1 diabetes mellitus. *Pediatr Diabetes.* 2020;21(8):1516-1524.
9. Landau Z, Abiri S, Gruber N, et al. Use of flash glucose-sensing technology (FreeStyle Libre) in youth with type 1 diabetes: AWeSoMe study group real-life observational experience [published correction appears in *Acta Diabetol.* 2018 Sep 12;:]. *Acta Diabetol.* 2018;55(12):1303-1310. doi:10.1007/s00592-018-1218-8
10. Gao Y, Zhou M, Xu X, Chen WY. Effects of flash glucose monitoring on glycemic control in participants with diabetes mellitus: A meta-analysis of randomized controlled trials. *J Diabetes Complications.* 2022;36(11):108314. doi:10.1016/j.jdiacomp.2022.108314
11. Gordon I, Rutherford C, Makarounas-Kirchmann K, Kirchmann M. Meta-analysis of average change in laboratory-measured HbA1c among people with type 1 diabetes mellitus using the 14 day Flash Glucose Monitoring System. *Diabetes Res Clin Pract.* 2020;164:108158. doi:10.1016/j.diabres.2020.108158
12. Castellana M, Parisi C, Di Molfetta S, et al. Efficacy and safety of flash glucose monitoring in patients with type 1 and type 2 diabetes: a systematic review and meta-analysis. *BMJ Open Diabetes Res Care.* 2020;8(1):e001092. doi:10.1136/bmjdr-2019-001092
13. Boucher SE, Gray AR, Wiltshire EJ, et al. Effect of 6 Months of Flash Glucose Monitoring in Youth With Type 1 Diabetes and High-Risk Glycemic Control: A Randomized Controlled Trial. *Diabetes Care.* 2020;43(10):2388-2395.
14. Serrano-Aguilar P, Asua-Batarrita J, Molina-López MT, et al. The Spanish Network of Agencies for Health Technology Assessment and Services of the National Health System (RedETS). *Int J Technol Assess Health Care.* 2019 Jan;35(3):176-180. doi: 10.1017/S0266462319000205. Epub 2019 Apr 22. PMID: 31006412.
15. Perestelo-Pérez L, Rivero-Santana A, García-Lorenzo B, Castilla-Rodríguez I, Vallejo-Torres L, García-Pérez L, et al. Efectividad, seguridad y coste-efectividad del sistema flash de monitorización de glucosa en líquido



1  
2  
3  
4 intersticial (FreeStyle Libre®) para la Diabetes Mellitus tipo 1 y 2. Ministerio de Sanidad, Servicios Sociales e  
5 Igualdad. Servicio de Evaluación del Servicio Canario de la Salud. Informes de Evaluación de Tecnologías  
6 Sanitarias; 2016  
7

8 16. Perestelo-Pérez L, Rivero-Santana A, García-Lorenzo B, Castilla-Rodríguez I, Vallejo-Torres L, García-Pérez L,  
9 et al. Efectividad, seguridad y coste-efectividad del sistema flash de monitorización de glucosa en líquido  
10 intersticial (FreeStyle Libre®) para la Diabetes Mellitus tipo 1 y 2 (Apéndice de actualización). Ministerio de  
11 Sanidad, Servicios Sociales e Igualdad. Servicio de Evaluación del Servicio Canario de la Salud. Informes de  
12 Evaluación de Tecnologías Sanitarias; 2017  
13

14 17. Servicio de Evaluación del Servicio Canario de la Salud. (s.f.). <http://www.sescs.es/>  
15

16 18. Resolución de 26 de abril de 2019, de la Dirección General de Cartera Básica de Servicios del Sistema Nacional  
17 de Salud y Farmacia, por la que se hace público el acuerdo de la Comisión de prestaciones, aseguramiento y  
18 financiación de 5 de noviembre de 2018 y 28 de marzo de 2019, sobre el sistema de monitorización de glucosa  
19 mediante sensores (tipo flash) en adultos en la cartera común de servicios del Sistema Nacional de Salud.  
20 [https://www.sanidad.gob.es/profesionales/prestacionesSanitarias/CarteraDeServicios/ContenidoCS/docs/Reso  
21 lucionglucosadultos.pdf](https://www.sanidad.gob.es/profesionales/prestacionesSanitarias/CarteraDeServicios/ContenidoCS/docs/Resolucionglucosadultos.pdf)  
22

23 19. Resolución de 30 de noviembre de 2020, de la Dirección General de Cartera Común de Servicios del Sistema  
24 Nacional de Salud y Farmacia, por la que se hace público el acuerdo de la Comisión de prestaciones,  
25 aseguramiento y financiación de 14 de julio de 2020 sobre el sistema de monitorización de glucosa mediante  
26 sensores (tipo flash) en la cartera común de servicios del Sistema Nacional de Salud.  
27 [https://www.sanidad.gob.es/profesionales/prestacionesSanitarias/CarteraDeServicios/ContenidoCS/docs/Reso  
29 l\\_Flash\\_2020.pdf](https://www.sanidad.gob.es/profesionales/prestacionesSanitarias/CarteraDeServicios/ContenidoCS/docs/Reso<br/>28 l_Flash_2020.pdf)  
30

31 20. Serrano-Aguilar P, Gutierrez-Ibarluzea I, Díaz P, Imaz-Iglesia I, González-Enríquez J, Castro JL, Espallargues M,  
32 et al. Postlaunch evidence-generation studies for medical devices in Spain: the RedETS approach to integrate  
33 real-world evidence into decision making. *Int J Technol Assess Health Care*. 2021 May 4;37(1):e63. doi:  
34 10.1017/S0266462321000295. PMID: 33942712  
35

36 21. Resolución de 28 de agosto de 2018, de la Dirección General de Cartera Básica de Servicios del Sistema  
37 Nacional de Salud y Farmacia, por la que se determina el sometimiento del sistema de monitorización de glucosa  
38 mediante sensores (tipo flash) a estudio de monitorización y se establecen sus requisitos específicos.  
39 <https://www.boe.es/boe/dias/2018/09/18/pdfs/BOE-A-2018-12686.pdf>  
40

41 22. Abbott Diabetes Care. Manual de Usuario. FreeStyle Libre. Sistema Flash de Monitorización de Glucosa.  
42 Madrid: 2017  
43

44 23. Wille N, Badia X, Bonsel G, et al. Development of the EQ-5D-Y: A child-friendly version of the EQ-5D. *Quality  
45 of Life Research*. 2010;19(6):875–886. 14. ref 20 informe final  
46

47 24. Mitchell K, Johnson K, Cullen K, et al. Parental mastery of continuous subcutaneous insulin infusion skills and  
48 glycemic control in youth with type1 diabetes. *Diabetes Technol Ther*. 2013;15(7):591-595.  
49

50 25. Bradley C. The Diabetes Treatment Satisfaction Questionnaire: DTSQ. In: Bradley C, editor. *Handbook of  
51 Psychology and Diabetes: a guide to psychological measurement in diabetes research and practice*. Chur,  
52 Switzerland: Harwood Academic Publishers. 1994. pp. 111–132  
53

54 26. Tanner, J M. *Growth at Adolescence: With a General Consideration of the Effects of Hereditary and  
55 Environmental Factors Upon Growth and Maturation from Birth to Maturity*. Oxford: Blackwell Scientific  
56 Publications, 1962. Print.  
57  
58  
59  
60

- 1
- 2
- 3
- 4 27. Hayes AJ, Leal J, Gray AM, et al. UKPDS outcomes model 2: a new version of a model to simulate lifetime
- 5 health outcomes of patients with type 2 diabetes mellitus using data from the 30 year United Kingdom
- 6 Prospective Diabetes Study: UKPDS 82. *Diabetologia*. 2013;56(9):1925-1933.
- 7
- 8 28. StataCorp. Stata statistical software: release 15. College Station, TX: StataCorp LLC, 2017.
- 9
- 10 29. IBM Corp. Released 2011. IBM SPSS Statistics for Windows, Version 20.0. Armonk, NY: IBM Corp.
- 11
- 12 30. Instituto Nacional de Estadística (INE). Actualización de rentas con el IPC general (sistema IPC base 2016) para
- 13 periodos anuales completos. Disponible en: <https://www.ine.es/calcula/>
- 14
- 15 31. Zhu W. Making bootstrap statistical inferences: a tutorial. *Res Q Exerc Sport*. 1997; 68:44-55.
- 16
- 17 32. Eurostat. Labour cost levels by NACE Rev. 2 activity. Disponible en:
- 18 [https://ec.europa.eu/eurostat/databrowser/view/lc\\_lci\\_lev/default/table?lang=en](https://ec.europa.eu/eurostat/databrowser/view/lc_lci_lev/default/table?lang=en)
- 19
- 20 33. Instituto Nacional de Estadística (INE). Encuesta de Población Activa (EPA). Disponible en:
- 21 [https://www.ine.es/dyngs/INEbase/es/operacion.htm?c=Estadistica\\_C&cid=1254736176918&menu=ultiDatos](https://www.ine.es/dyngs/INEbase/es/operacion.htm?c=Estadistica_C&cid=1254736176918&menu=ultiDatos)
- 22 &idp=1254735976595
- 23
- 24 34. Ang E, Lee ZX, Moore S, Nana M. Flash glucose monitoring (FGM): A clinical review on glycaemic outcomes
- 25 and impact on quality of life. *J Diabetes Complications*. 2020 Jun;34(6):107559. doi:
- 26 10.1016/j.jdiacomp.2020.107559. Epub 2020 Feb 13. PMID: 32089428.
- 27
- 28 35. Evans M, Welsh Z, Ells S, et al. The Impact of Flash Glucose Monitoring on Glycaemic Control as Measured by
- 29 HbA1c: A Meta-analysis of Clinical Trials and Real-World Observational Studies. *Diabetes Ther*. 2020;11(1):83-95.
- 30
- 31 36. Gordon I, Rutherford C, Makarounas-Kirchmann K, et al. Meta-analysis of average change in laboratory-
- 32 measured HbA1c among people with type 1 diabetes mellitus using the 14 day Flash Glucose Monitoring System.
- 33 *Diabetes Res Clin Pract*. 2020;164:108158.
- 34
- 35 37. Leiva-Gea I, Garcia Vázquez J, Liñán Jurado FR, et al. Introduction of Flash Glucose Monitoring in Children
- 36 with Type 1 Diabetes: Experience of a Single-Centre in Spain. *ESPE Abstracts (2019) 92 LB-20*
- 37
- 38 38. Teo E, Hassan N, Tam W, Koh S. Effectiveness of continuous glucose monitoring in maintaining glycaemic
- 39 control among people with type 1 diabetes mellitus: a systematic review of randomised controlled trials and
- 40 meta-analysis. *Diabetologia*. 2022;65(4):604-619. doi:10.1007/s00125-021-05648-4
- 41
- 42 39. Messaaoui A, Tenoutasse S, Crenier L. Flash Glucose Monitoring Accepted in Daily Life of Children and
- 43 Adolescents with Type 1 Diabetes and Reduction of Severe Hypoglycemia in Real-Life Use. *Diabetes Technol Ther*.
- 44 2019 Jun;21(6):329-335. doi: 10.1089/dia.2018.0339. Epub 2019 May 6. PMID: 31058545.
- 45
- 46 40. Urakami T, Yoshida K, Kuwabara R, et al. Frequent scanning using flash glucose monitoring contributes to
- 47 better glycemic control in children and adolescents with type 1 diabetes. *J Diabetes Investig*. 2021.
- 48
- 49 41. Lameijer A, Lommerde N, Dunn TC, et al. Flash Glucose Monitoring in the Netherlands: Increased monitoring
- 50 frequency is associated with improvement of glycemic parameters. *Diabetes Res Clin Pract*. 2021;177:108897.
- 51
- 52 42. Battelino T, Liabat S, Veeze HJ, et al. Routine use of continuous glucose monitoring in 10 501 people with
- 53 diabetes mellitus. *Diabet Med*. 2015;32(12):1568-74.
- 54
- 55 43. Ang E, Lee ZX, Moore S, et al. Flash glucose monitoring (FGM): A clinical review on glycaemic outcomes and
- 56 impact on quality of life. *J Diabetes Complications*. 2020;34(6):107559.
- 57
- 58
- 59
- 60

1  
2  
3  
4 44. Palylyk-Colwell E, Ford C. Flash Glucose Monitoring System for Diabetes. 2017 Jun 1. In: CADTH Issues in  
5 Emerging Health Technologies. Ottawa (ON): Canadian Agency for Drugs and Technologies in Health; 2016-. 158.  
6  
7 45. Lin R, Brown F, James S, Jones J, Ekinci E. Continuous glucose monitoring: A review of the evidence in type 1  
8 and 2 diabetes mellitus. Diabet Med. 2021 May;38(5):e14528. doi: 10.1111/dme.14528. Epub 2021 Mar 6. PMID:  
9 33496979.  
10  
11  
12  
13  
14  
15  
16  
17  
18  
19  
20  
21  
22  
23  
24  
25  
26  
27  
28  
29  
30  
31  
32  
33  
34  
35  
36  
37  
38  
39  
40  
41  
42  
43  
44  
45  
46  
47  
48  
49  
50  
51  
52  
53  
54  
55  
56  
57  
58  
59  
60

For peer review only

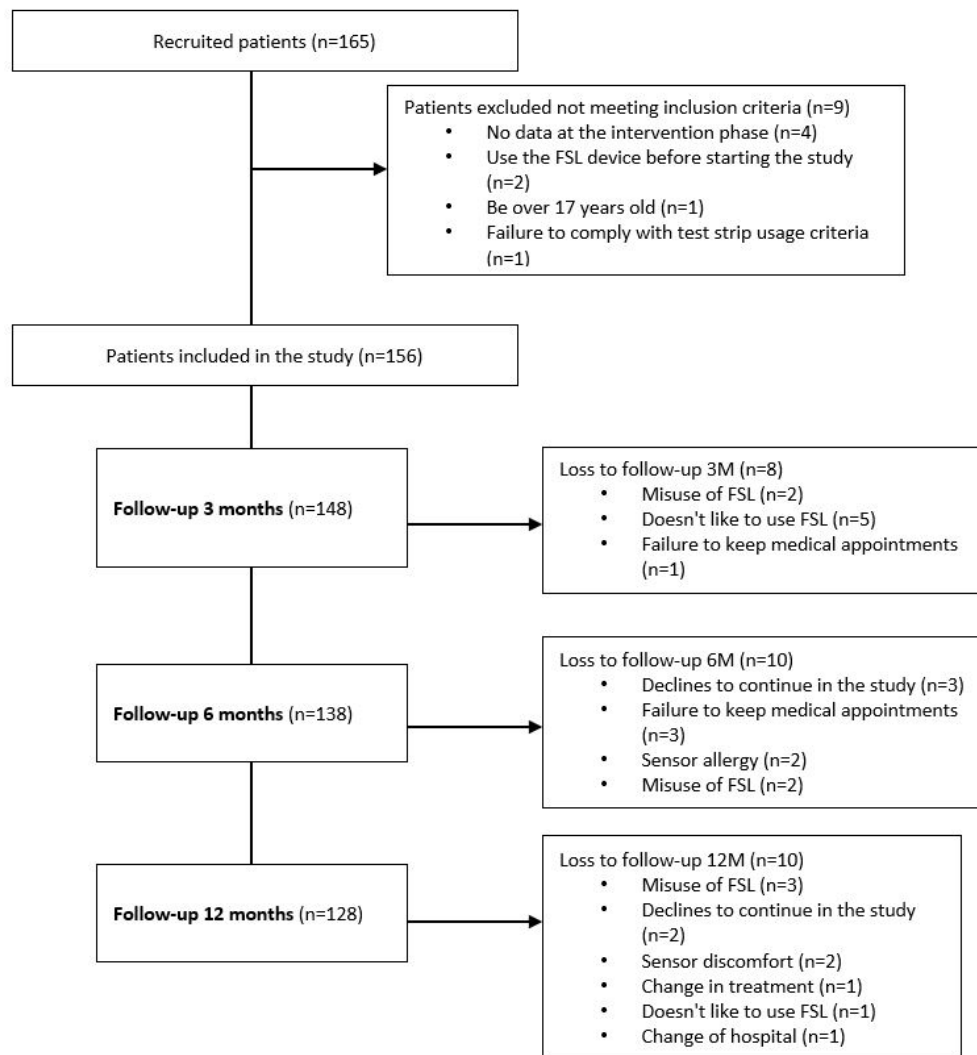

Figure1. Flow-charts

201x216mm (96 x 96 DPI)

**Appendix 1. Participating hospitals and cases included in the study**

| Public hospitals                               | Regional Health Services | Number of patients |
|------------------------------------------------|--------------------------|--------------------|
| Hospital Universitario Virgen Macarena*        | Andalucía                | 2                  |
| Hospital Universitario Central de Asturias*    | Asturias                 | 4                  |
| Hospital Universitario Vall D'hebron*          | Cataluña                 | 22                 |
| Hospital Universitario de Badajoz              | Extremadura              | 30                 |
| Complejo Hospitalario Universitario A Coruña*  | Galicia                  | 23                 |
| Complejo Hospitalario Universitario de Ourense | Galicia                  | 14                 |
| Hospital Da Barbanza                           | Galicia                  | 5                  |
| Fundación Hospital Calahorra                   | La Rioja                 | 1                  |
| Hospital San Pedro                             | La Rioja                 | 13                 |
| Hospital Severo Ochoa                          | Madrid                   | 21                 |
| Hospital Universitario 12 De Octubre*          | Madrid                   | 4                  |
| Hospital Universitario La Paz*                 | Madrid                   | 16                 |
| Hospital Universitario Dr. Peset Aleixandre    | Valencia                 | 1                  |
| *Tertiary hospital                             |                          |                    |

## Appendix 2. Comparability analysis and description of the missing data imputation model

### Comparability analysis

For comparability analysis, the baseline characteristics of patients (gender, age, HbA1c, BMI, time since diagnosis, presence of comorbidities, and pubertal stage) were compared between participants who completed the different follow-up phases and those who had total or partial loss to follow-up at 3, 6, and 12 months. No significant differences were found for any of these variables at the 3-month follow-up. At 6 months, significant differences were observed between responders and non-responders in relation to pubertal stage V (25% vs. 75%) ( $p = 0.04$ ). At the 12-month follow-up, differences were observed in pubertal stages IV (21.7% vs. 78.3%) and V (31.2% vs. 68.8%) ( $p = 0.007$ ); significant differences were also observed in the mean age value ( $p = 0.04$ ) between responders (12.3 years) and non-responders (13.7 years).

|                                  | 3 months                             |                                                 |       | 6 months                              |                                                 |              | 12 months                             |                                                 |              |
|----------------------------------|--------------------------------------|-------------------------------------------------|-------|---------------------------------------|-------------------------------------------------|--------------|---------------------------------------|-------------------------------------------------|--------------|
|                                  | Participants lost to follow-up (n=6) | Participants who continued in the study (n=150) | p     | Participants lost to follow-up (n=20) | Participants who continued in the study (n=136) | p            | Participants lost to follow-up (n=28) | Participants who continued in the study (n=128) | p            |
| Sex (male), n (%)                | 4 (4.7)                              | 82 (95.3)                                       | 0.562 | 8 (9.3)                               | 78 (90.7)                                       | 0.145        | 16 (18.6)                             | 70 (81.4)                                       | 0.813        |
| Age (years), mean (SD)           | 13 (4.86)                            | 12.55 (3.09)                                    | 0.829 | 13.3 (3.81)                           | 12.46 (3.05)                                    | 0.266        | 13.68 (2.91)                          | 12.32 (3.17)                                    | <b>0.039</b> |
| HbA1c, mean (SD)                 | 8.42 (0.62)                          | 7.83 (1.38)                                     | 0.303 | 8.36 (2.01)                           | 7.78 (1.23)                                     | 0.224        | 8.08 (1.81)                           | 7.81 (1.24)                                     | 0.33         |
| BMI, mean (SD)                   | 20.73 (2.87)                         | 20.28 (4.10)                                    | 0.789 | 21.33 (2.91)                          | 20.14 (4.18)                                    | 0.224        | 21.33 (2.88)                          | 20.07 (4.24)                                    | 0.135        |
| Duración de la DM1, mean (SD)    | 7.19 (3.86)                          | 5.59 (3.37)                                     | 0.257 | 6.42 (3.43)                           | 5.54 (3.38)                                     | 0.275        | 6.74 (3.39)                           | 5.41 (3.36)                                     | 0.061        |
| Presence of comorbidities, n (%) | 1 (2.0)                              | 49 (98.0)                                       | 0.41  | 7 (14)                                | 43 (86)                                         | 0.762        | 9 (18)                                | 41 (82)                                         | 0.991        |
| Pubertal status, n (%)           |                                      |                                                 | 0.473 |                                       |                                                 | <b>0.043</b> |                                       |                                                 | <b>0.007</b> |
| I                                | 2 (3.9)                              | 49 (96.1)                                       |       | 5 (9.8)                               | 46 (90.2)                                       |              | 5 (9.8)                               | 46 (90.2)                                       |              |
| II                               | 0 (0)                                | 14 (100)                                        |       | 1 (7.1)                               | 13 (92.9)                                       |              | 3 (21.4)                              | 11 (78.6)                                       |              |
| III                              | 0 (0)                                | 20 (100)                                        |       | 0 (0)                                 | 20 (100)                                        |              | 0 (0)                                 | 20 (100)                                        |              |
| IV                               | 0 (0)                                | 23 (100)                                        |       | 2 (8.7)                               | 21 (91.3)                                       |              | 5 (21.7)                              | 18 (78.3)                                       |              |
| V                                | 4 (8.3)                              | 44 (91.7)                                       |       | 12 (25)                               | 36 (75)                                         |              | 15 (31.2)                             | 33 (68.8)                                       |              |

SD = Standard deviation; HbA1c = Glycated haemoglobin; BMI = Body mass index.

### Description of the missing data imputation model

For multiple imputation was performed by chained equations using Stata 15.0 software. The variables sex, age, pubertal stage, presence of comorbidities and duration of diabetes were considered regular and used as predictors for imputation. A total of 29 variables were imputed. Each variable was imputed in chronological order: 3, 6 and 12 months. As a general rule, the latest available information on the variable to be imputed was used. When information from other variables was used, the information from the same point in time was used. A total of 10 imputations were made for each missing data.

| Order | Imputed variable                                       | Variables used in imputation                                                                                                                                                                                                       | Imputation model | n (%) missing |
|-------|--------------------------------------------------------|------------------------------------------------------------------------------------------------------------------------------------------------------------------------------------------------------------------------------------|------------------|---------------|
| 1     | HbA1c 3M                                               | Sex, Age, Pubertal stage, Presence of comorbidities, Time since diagnosis, HbA1c Baseline                                                                                                                                          | pmm              | 7 (4.5)       |
| 2     | HbA1c 6M                                               | Sex, Age, Pubertal stage, Presence of comorbidities, Time since diagnosis, HbA1c 3M                                                                                                                                                | pmm              | 20 (12.8)     |
| 3     | HbA1c 12M                                              | Sex, Age, Pubertal stage, Presence of comorbidities, Time since diagnosis, HbA1c 6M                                                                                                                                                | pmm              | 28 (17.9)     |
| 4     | BMI 6M                                                 | Sex, Age, Pubertal stage, Presence of comorbidities, Time since diagnosis, BMI Baseline                                                                                                                                            | pmm              | 24 (15.4)     |
| 5     | BMI 12M                                                | Sex, Age, Pubertal stage, Presence of comorbidities, Time since diagnosis, BMI 6M                                                                                                                                                  | pmm              | 28 (17.9)     |
| 6     | N. <sup>o</sup> severe hypoglycaemia events 3M         | Sex, Age, Pubertal stage, Presence of comorbidities, Time since diagnosis, N. <sup>o</sup> severe hypoglycaemia events Baseline                                                                                                    | poisson          | 7 (4.5)       |
| 7     | N. <sup>o</sup> severe hypoglycaemia events 6M         | Sex, Age, Pubertal stage, Presence of comorbidities, Time since diagnosis, N. <sup>o</sup> severe hypoglycaemia events 3M                                                                                                          | poisson          | 7 (4.5)       |
| 8     | N. <sup>o</sup> severe hypoglycaemia events 12M        | Sex, Age, Pubertal stage, Presence of comorbidities, Time since diagnosis, N. <sup>o</sup> severe hypoglycaemia events 6M                                                                                                          | poisson          | 7 (4.5)       |
| 9     | N. <sup>o</sup> severe hypoglycaemia events on EHR 3M  | Sex, Age, Pubertal stage, Presence of comorbidities, Time since diagnosis, N. <sup>o</sup> severe hypoglycaemia events 3M, N. <sup>o</sup> severe hypoglycaemia events on EHR Baseline                                             | poisson          | 8 (5.1)       |
| 10    | N. <sup>o</sup> severe hypoglycaemia events on EHR 6M  | Sex, Age, Pubertal stage, Presence of comorbidities, Time since diagnosis, N. <sup>o</sup> severe hypoglycaemia events 6M, N. <sup>o</sup> severe hypoglycaemia events on EHR 3M                                                   | poisson          | 28 (17.9)     |
| 11    | N. <sup>o</sup> severe hypoglycaemia events on EHR 12M | Sex, Age, Pubertal stage, Presence of comorbidities, Time since diagnosis, N. <sup>o</sup> severe hypoglycaemia events 12M, N. <sup>o</sup> severe hypoglycaemia events on EHR 6M                                                  | poisson          | 28 (17.9)     |
| 12    | VAS 12M                                                | Sex, Age, Pubertal stage, Presence of comorbidities, Time since diagnosis, Mobility EQ-5D-Y 12M, Self-care EQ-5D-Y 12M, Habitual activities EQ-5D-Y 12M, Pain/discomfort EQ-5D-Y 12M, Anxiety/depression EQ-5D-Y 12M, VAS Baseline | pmm              | 36 (23.1)     |
| 13    | Knowledge about Baseline                               | Sex, Age, Pubertal stage, Presence of comorbidities, Time since diagnosis, HbA1c Baseline, BMI Baseline                                                                                                                            | pmm              | 14 (9.0)      |
| 14    | Knowledge about 12M                                    | Sex, Age, Pubertal stage, Presence of comorbidities, Time since diagnosis, HbA1c 12M, BMI 12M, Knowledge about Baseline                                                                                                            | pmm              | 48 (30.8)     |
| 15    | Hyperglycaemia DTSQ Baseline                           | Sex, Age, Pubertal stage, Presence of comorbidities, Time since diagnosis, HbA1c Baseline, Knowledge about Baseline                                                                                                                | pmm              | 14 (9.0)      |
| 16    | Hyperglycaemia DTSQ 12M                                | Sex, Age, Pubertal stage, Presence of comorbidities, Time since diagnosis, HbA1c 12M, Knowledge about 12M, Hyperglycaemia DTSQ Baseline                                                                                            | pmm              | 48 (30.8)     |
| 17    | Hypoglycaemia DTSQ Baseline                            | Sex, Age, Pubertal stage, Presence of comorbidities, Time since diagnosis                                                                                                                                                          | pmm              | 14 (9.0)      |
| 18    | Hypoglycaemia DTSQ 12M                                 | Sex, Age, Pubertal stage, Presence of comorbidities, Time since diagnosis, Hypoglycaemia DTSQ Baseline                                                                                                                             | pmm              | 48 (30.8)     |

|                                                                                                                                                                                                                                                                                                      |                                           |                                                                                                                                                                                                                                                     |     |           |
|------------------------------------------------------------------------------------------------------------------------------------------------------------------------------------------------------------------------------------------------------------------------------------------------------|-------------------------------------------|-----------------------------------------------------------------------------------------------------------------------------------------------------------------------------------------------------------------------------------------------------|-----|-----------|
| 19                                                                                                                                                                                                                                                                                                   | Satisfaction with treatment DTSQ Baseline | Sex. Age. Pubertal stage. Presence of comorbidities. Time since diagnosis. N.º severe hypoglycaemia events Baseline. N.º severe hypoglycaemia events on EHR Baseline. Knowledge about Baseline. Hyperglycaemia DTSQ Baseline.                       | pmm | 14 (9.0)  |
| 20                                                                                                                                                                                                                                                                                                   | Satisfaction with treatment DTSQ 12M      | Sex. Age. Pubertal stage. Presence of comorbidities. Time since diagnosis. N.º severe hypoglycaemia events 12M. N.º severe hypoglycaemia events on EHR 12M. Knowledge about 12M. Hyperglycaemia DTSQ 12M. Satisfaction with treatment DTSQ Baseline | pmm | 48 (30.8) |
| 21                                                                                                                                                                                                                                                                                                   | N.º of daily scans 3M                     | Sex. Age. Pubertal stage. Presence of comorbidities. Time since diagnosis. HbA1c 3M. BMI Baseline. N.º severe hypoglycaemia events 3M                                                                                                               | pmm | 8 (5.1)   |
| 22                                                                                                                                                                                                                                                                                                   | N.º of daily scans 6M                     | Sex. Age. Pubertal stage. Presence of comorbidities. Time since diagnosis. HbA1c 6M. BMI 6M. N.º severe hypoglycaemia events 6M. N.º of daily scans 3M                                                                                              | pmm | 19 (12.2) |
| 23                                                                                                                                                                                                                                                                                                   | N.º of daily scans 12M                    | Sex. Age. Pubertal stage. Presence of comorbidities. Time since diagnosis. HbA1c 12M. BMI 12M. N.º severe hypoglycaemia events 12M. N.º of daily scans 6M                                                                                           | pmm | 28 (17.9) |
| 24                                                                                                                                                                                                                                                                                                   | Sensor usage time 3M                      | Sex. Age. Pubertal stage. Presence of comorbidities. Time since diagnosis. HbA1c 3M. N.º ketoacidosis 3M. N.º of daily scans 3M                                                                                                                     | pmm | 8 (5.1)   |
| 25                                                                                                                                                                                                                                                                                                   | Sensor usage time 6M                      | Sex. Age. Pubertal stage. Presence of comorbidities. Time since diagnosis. HbA1c 6M. N.º ketoacidosis 6M. N.º of daily scans 6M. Sensor usage time 3M                                                                                               | pmm | 19 (12.2) |
| 26                                                                                                                                                                                                                                                                                                   | Sensor usage time 12M                     | Sex. Age. Pubertal stage. Presence of comorbidities. Time since diagnosis. HbA1c 12M. N.º ketoacidosis 12M. N.º of daily scans 12M. Sensor usage time 6M                                                                                            | pmm | 28 (17.9) |
| 27                                                                                                                                                                                                                                                                                                   | N.º Sensors 3M                            | Sex. Age. Pubertal stage. Presence of comorbidities. Time since diagnosis. N.º ketoacidosis 3M. Sensor usage time 3M                                                                                                                                | pmm | 7 (4.5)   |
| 28                                                                                                                                                                                                                                                                                                   | N.º Sensors 6M                            | Sex. Age. Pubertal stage. Presence of comorbidities. Time since diagnosis. N.º ketoacidosis 6M. Sensor usage time 6M. N.º Sensors 3M                                                                                                                | pmm | 19 (12.2) |
| 29                                                                                                                                                                                                                                                                                                   | N.º Sensors 12M                           | Sex. Age. Pubertal stage. Presence of comorbidities. Time since diagnosis. N.º ketoacidosis 12M. Sensor usage time 12M. N.º Sensors 6M                                                                                                              | pmm | 28 (17.9) |
| DM = Diabetes Mellitus; T1DM = Type 1 Diabetes Mellitus; DTSQ = Diabetes Treatment Satisfaction Questionnaire; EQ-5D-Y = Health-related quality of life questionnaire; VAS = visual analogue scale; HbA1c = Glycated haemoglobin; EHR = Electronic Health Record; BMI = Body mass index; M = Months. |                                           |                                                                                                                                                                                                                                                     |     |           |



### Appendix 3. Cost estimation

#### List of tables:

Table A1. Use of resources and unit costs

Table A2. Total annual cost per patient of the FSL flash glucose monitoring system (€2021)

Table A3. Average number of test strips and lancets per patient and total annual costs due to lost parent/caregiver productivity before and after FSL use.

#### List of figures:

Figure A1. Total annual costs per patient before and after use of the FSL (does not include cost of device)

**Table A1. Use of resources and unit costs**

|                                 | Unit cost €2021<br>(SD) | Source                             |
|---------------------------------|-------------------------|------------------------------------|
| Hospitalization /day            | 652.58 (188.86)         | Public tariff*                     |
| Visit to specialist             | 95.65 (33.98)           | Public tariff*                     |
| Visit to nurse at primary care  | 27.06 (7.52)            | Public tariff*                     |
| Hospital emergency              | 207.54 (72.03)          | Public tariff*                     |
| Visit to doctor at primary care | 50.91 (17.63)           | Public tariff*                     |
| Non-hospital emergency          | 99.41 (22.83)           | Public tariff*                     |
| HbA1c determination             | 7.15 (5.16)             | Public tariff*                     |
| Test strips                     | 0.43 (0.15)             | Consult*                           |
| Lancets                         | 0.109 (0.11)            | Consult*                           |
| Absenteeism day                 | 166.896                 | Estimate based on Eurostat and INE |

SD = Standard Deviation

\* Spanish autonomous communities.

INE = Spanish Statistical Office.

Unit costs come from different sources, all national, and include official tariffs. Where possible, the average costs of those Spanish regions for which data were available were taken into account

To estimate the unit cost of test strips and lancets, the Spanish regions were consulted for their spending on these products. There was great heterogeneity between regions, not only in the unit cost (between €0.10 and €0.48), but also in the products financed, since lancets are only financed in some regions.

**Table A2. Total annual cost per patient of the FSL flash glucose monitoring system (€2021)**

|                | Primary care        | Emergency         | Specialist          | Laboratory       | Monitoring*         | Total costs        |
|----------------|---------------------|-------------------|---------------------|------------------|---------------------|--------------------|
| Mean (SD)      | 136.78<br>(101.28)  | 50.70<br>(161.66) | 415.48<br>(129.53)  | 29.05 (5.87)     | 447.25<br>(317.58)  | 1079.26 (425.73)   |
| Min. –<br>Max. | 0 – 474.24          | 0 – 1245.24       | 0 – 956.5           | 14.30 –<br>71.50 | 0 – 1295.39         | 219.9 – 2501.19    |
| CI95%          | (119.88;<br>154.65) | (25.74;<br>80.73) | (393.81;<br>438.65) | (28.1;<br>30.16) | (392.57;<br>501.77) | (1007.41; 1152.15) |

CI95% = Confidence interval at 95% by Bootstrap based on 10,000 samples; Max. = Maximum; Min. = Minimum; SD = Standard Deviation

\*Test strips and lancets. Not include the cost of sensor

**Table A3. Average number of test strips and lancets per patient and total annual costs due to lost parent/caregiver productivity before and after FSL use.**

|                                                                                                     | Before use of the flash glucose monitoring system | After use of the flash glucose monitoring system |
|-----------------------------------------------------------------------------------------------------|---------------------------------------------------|--------------------------------------------------|
| <b>Average number of test strips and lancets per patient before and after use of the FSL device</b> |                                                   |                                                  |
| Yearly test strips, mean (SD)                                                                       | 2686.02 (527.63)                                  | 883.98 (669.45)                                  |
| Yearly Lancets, mean (SD)                                                                           | 1366.41 (1063.44)                                 | 615.94 (482.03)                                  |
| <b>Total annual cost per patient due to productivity losses (€2021)</b>                             |                                                   |                                                  |
| Mean (SD)                                                                                           | 545.67 (588.29)                                   | 262.73 (334.30)                                  |
| Min. – Max.                                                                                         | 0 – 3504.82                                       | 0 – 1668.96                                      |
| CI95%                                                                                               | (448.55; 650.63)                                  | (206.65; 322.71)                                 |

CI95% = Confidence interval at 95% by Bootstrap based on 10,000 samples; Max. = Maximum; Min. = Minimum; SD = Standard Deviation

**Figure A1. Total annual costs per patient before and after use of the FSL (does not include cost of device)**

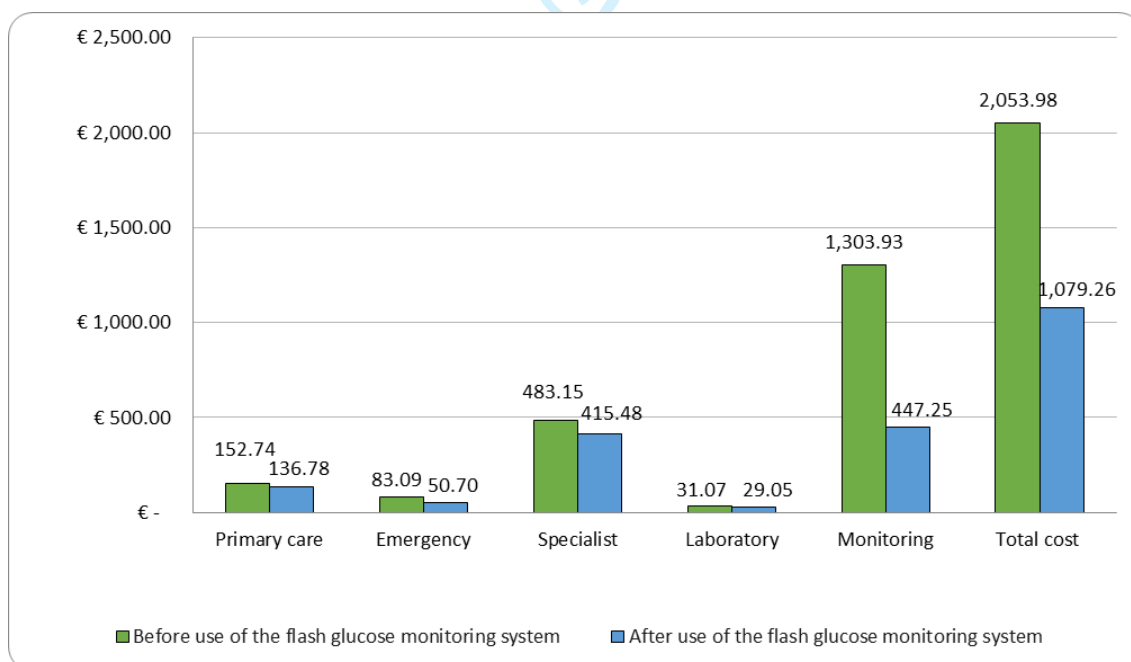

#### Appendix 4. Evolution of outcome measures during follow-up (by age group and baseline HbA1c control)

|                                                                                                   | Baseline    | 3 months    | 6 months    | 12 months   | Differences 12 months-Baseline |
|---------------------------------------------------------------------------------------------------|-------------|-------------|-------------|-------------|--------------------------------|
| <b>HbA1c, mean (SD)</b>                                                                           |             |             |             |             |                                |
| Total                                                                                             | 7.86 (1.36) | 7.58 (1.27) | 7.59 (1.16) | 7.73 (1.06) | -0.13 (-0.42; 0.16)            |
| HbA1c <7.5%                                                                                       | 6.82 (0.36) | 6.86 (0.55) | 6.96 (0.6)  | 7.14 (0.57) | 0.32 (0.15; 0.49)              |
| HbA1c ≥7.5%                                                                                       | 8.65 (1.31) | 8.18 (1.38) | 8.14 (1.25) | 8.2 (1.12)  | -0.45 (-0.84; -0.06)           |
| < 12 years                                                                                        | 7.83 (1.17) | 7.42 (0.93) | 7.53 (0.96) | 7.57 (0.8)  | -0.26 (-0.59; 0.07)            |
| ≥ 12 years                                                                                        | 7.87 (1.45) | 7.66 (1.41) | 7.63 (1.26) | 7.82 (1.19) | -0.05 (-0.45; 0.35)            |
| <b>With self-reported severe hypoglycemia, n (%)</b>                                              |             |             |             |             |                                |
| Total                                                                                             | 49 (31.4)   | -           | -           | 55 (36.9)   | 5.5% (-12.7; 23.7)             |
| HbA1c <7.5%                                                                                       | 26 (38.2)   | -           | -           | 24 (35.3)   | -2.9% (-29.6; 23.8)            |
| HbA1c ≥7.5%                                                                                       | 23 (26.1)   | -           | -           | 31 (38.3)   | 12.2% (-12.6; 37.0)            |
| < 12 years                                                                                        | 22 (41.5)   | -           | -           | 19 (37.3)   | -4.2% (-34.1; 25.7)            |
| ≥ 12 years                                                                                        | 27 (26.2)   | -           | -           | 36 (36.7)   | 10.5% (-12.4; 33.4)            |
| <b>N<sup>o</sup>. Self-reported severe hypoglycemia, mean (SD)</b>                                |             |             |             |             |                                |
| Total                                                                                             | 1.72 (3.65) | -           | -           | 1.77 (5.08) | 0.05 (-0.98; 1.1)              |
| HbA1c <7.5%                                                                                       | 2.34 (4.13) | -           | -           | 1.95 (5.69) | -0.39 (-2.2; 1.4)              |
| HbA1c ≥7.5%                                                                                       | 1.26 (3.19) | -           | -           | 1.63 (4.58) | 0.37 (-0.86; 1.6)              |
| < 12 years                                                                                        | 2.12 (4.04) | -           | -           | 1.06 (3.65) | -1.06 (-2.6; 0.48)             |
| ≥ 12 years                                                                                        | 1.52 (3.43) | -           | -           | 2.20 (5.76) | 0.68 (-0.69; 2.1)              |
| <b>With severe hypoglycemia in the electronic clinical record, n (%)</b>                          |             |             |             |             |                                |
| Total                                                                                             | 19 (12.2)   | -           | -           | 23 (15.4)   | 3.2% (-17.6; 24.0)             |
| HbA1c <7.5%                                                                                       | 6 (8.8)     | -           | -           | 6 (8.8)     | 0% (-32.0; 32.0)               |
| HbA1c ≥7.5%                                                                                       | 13 (14.8)   | -           | -           | 17 (21.0)   | 6.2% (-21.1; 33.5)             |
| < 12 years                                                                                        | 9 (17.0)    | -           | -           | 6 (11.8)    | -5.2% (-40.8; 30.4)            |
| ≥ 12 years                                                                                        | 10 (9.7)    | -           | -           | 17 (17.4)   | 7.7% (-0.18; 0.33)             |
| <b>N<sup>o</sup> Hypoglycemia in the electronic clinical record prior to the study, mean (SD)</b> |             |             |             |             |                                |
| Total                                                                                             | 0.39 (1.68) | -           | -           | 0.54 (1.58) | 0.15 (-0.23; 0.53)             |
| HbA1c <7.5%                                                                                       | 0.13 (0.45) | -           | -           | 0.25 (1.06) | 0.12 (-0.16; 0.40)             |
| HbA1c ≥7.5%                                                                                       | 0.59 (2.18) | -           | -           | 0.78 (1.88) | 0.19 (-0.43; 0.81)             |
| < 12 years                                                                                        | 0.34 (1.02) | -           | -           | 0.61 (1.89) | 0.27 (-0.32; 0.86)             |
| ≥ 12 years                                                                                        | 0.42 (1.94) | -           | -           | 0.5 (1.40)  | 0.08 (-0.39; 0.55)             |
| <b>Health-related quality of life (EQ-5D-Y), n (%)</b>                                            |             |             |             |             |                                |
| <b>Mobility (no problems), n (%)</b>                                                              |             |             |             |             |                                |
| Total                                                                                             | 156 (100)   | -           | -           | 124 (100)   | -                              |
| HbA1c <7.5%                                                                                       | 68 (100)    | -           | -           | 54 (100)    | -                              |
| HbA1c ≥7.5%                                                                                       | 88 (100)    | -           | -           | 70 (100)    | -                              |
| < 12 years                                                                                        | 53 (100)    | -           | -           | 47 (100)    | -                              |
| ≥ 12 years                                                                                        | 103 (100)   | -           | -           | 77 (100)    | -                              |
| <b>Self-Care (no problems), n (%)</b>                                                             |             |             |             |             |                                |
| Total                                                                                             | 154 (98.7)  | -           | -           | 123 (99.2)  | -                              |
| HbA1c <7.5%                                                                                       | 67 (98.5)   | -           | -           | 54 (100)    | -                              |
| HbA1c ≥7.5%                                                                                       | 87 (98.9)   | -           | -           | 69 (98.6)   | -                              |
| < 12 years                                                                                        | 51 (96.2)   | -           | -           | 47 (100)    | -                              |
| ≥ 12 years                                                                                        | 103 (100)   | -           | -           | 76 (98.7)   | -                              |
| <b>Usual Activities (no problems), n (%)</b>                                                      |             |             |             |             |                                |
| Total                                                                                             | 154 (98.7)  | -           | -           | 122 (98.4)  | -                              |
| HbA1c <7.5%                                                                                       | 67 (98.5)   | -           | -           | 53 (98.1)   | -                              |
| HbA1c ≥7.5%                                                                                       | 87 (98.9)   | -           | -           | 69 (98.6)   | -                              |
| < 12 years                                                                                        | 53 (100)    | -           | -           | 47 (100)    | -                              |
| ≥ 12 years                                                                                        | 101 (98.1)  | -           | -           | 75 (97.4)   | -                              |
| <b>Pain or Discomfort (no pain), n (%)</b>                                                        |             |             |             |             |                                |
| Total                                                                                             | 144 (92.3)  | -           | -           | 118 (95.2)  | -                              |
| HbA1c <7.5%                                                                                       | 62 (91.2)   | -           | -           | 53 (98.1)   | -                              |
| HbA1c ≥7.5%                                                                                       | 82 (93.2)   | -           | -           | 65 (92.9)   | -                              |

|    |                                                                                    |                 |                 |                 |                  |                                |
|----|------------------------------------------------------------------------------------|-----------------|-----------------|-----------------|------------------|--------------------------------|
| 1  |                                                                                    |                 |                 |                 |                  |                                |
| 2  |                                                                                    |                 |                 |                 |                  |                                |
| 3  | < 12 years                                                                         | 50 (94.3)       | -               | -               | 45 (95.7)        | -                              |
| 4  | ≥ 12 years                                                                         | 94 (91.3)       | -               | -               | 73 (94.8)        | -                              |
| 5  | <b>Pain or Discomfort (some pain), n (%)</b>                                       |                 |                 |                 |                  |                                |
| 6  | Total                                                                              | 12 (7.7)        | -               | -               | 6 (4.8)          | -                              |
| 7  | HbA1c <7.5%                                                                        | 6 (8.8)         | -               | -               | 1 (1.9)          | -                              |
| 8  | HbA1c ≥7.5%                                                                        | 6 (6.8)         | -               | -               | 5 (7.1)          | -                              |
| 9  | < 12 years                                                                         | 3 (5.7)         | -               | -               | 2 (4.3)          | -                              |
| 10 | ≥ 12 years                                                                         | 9 (8.7)         | -               | -               | 4 (5.2)          | -                              |
| 11 | <b>Anxiety/Depression (no problems), n (%)</b>                                     |                 |                 |                 |                  |                                |
| 12 | Total                                                                              | 137 (87.8)      | -               | -               | 112 (90.3)       | -                              |
| 13 | HbA1c <7.5%                                                                        | 62 (91.2)       | -               | -               | 50 (92.6)        | -                              |
| 14 | HbA1c ≥7.5%                                                                        | 75 (85.2)       | -               | -               | 62 (88.6)        | -                              |
| 15 | < 12 years                                                                         | 49 (92.5)       | -               | -               | 44 (93.6)        | -                              |
| 16 | ≥ 12 years                                                                         | 88 (85.4)       | -               | -               | 68 (88.3)        | -                              |
| 17 | <b>Anxiety/Depression (some problems), n (%)</b>                                   |                 |                 |                 |                  |                                |
| 18 | Total                                                                              | 16 (10.3)       | -               | -               | 10 (8.1)         | -                              |
| 19 | HbA1c <7.5%                                                                        | 5 (7.4)         | -               | -               | 4 (7.4)          | -                              |
| 20 | HbA1c ≥7.5%                                                                        | 11 (12.5)       | -               | -               | 6 (8.6)          | -                              |
| 21 | < 12 years                                                                         | 3 (5.7)         | -               | -               | 2 (4.3)          | -                              |
| 22 | ≥ 12 years                                                                         | 13 (12.6)       | -               | -               | 8 (10.4)         | -                              |
| 23 | <b>VAS, mean (sd)</b>                                                              |                 |                 |                 |                  |                                |
| 24 | Total                                                                              | 87.63 (12.46)   | -               | -               | 84.17 (12.28)    | -3.5 (-6.4; -0.53)             |
| 25 | HbA1c <7.5%                                                                        | 88.79 (10.05)   | -               | -               | 87.92 (10.08)    | 0.29 (-3.9; 4.5)               |
| 26 | HbA1c ≥7.5%                                                                        | 86.74 (14.04)   | -               | -               | 81.29 (16.29)    | -7.5 (-11.7; -3.3)             |
| 27 | < 12 years                                                                         | 91.66 (9.72)    | -               | -               | 85.61 (14.97)    | -6.1 (-11.0; -1.1)             |
| 28 | ≥ 12 years                                                                         | 85.56 (13.23)   | -               | -               | 83.27 (13.86)    | -2.3 (-6.3; 1.7)               |
| 29 | <b>Knowledge about DM1 (modified version of Mitchell questionnaire), mean (SD)</b> |                 |                 |                 |                  |                                |
| 30 | Total                                                                              | 11.68 (2.13)    | -               | -               | 12.09 (1.94)     | 0.41 (-0.11; 0.93)             |
| 31 | HbA1c <7.5%                                                                        | 12.38 (1.98)    | -               | -               | 12.92 (1.35)     | 0.54 (-0.11; 1.2)              |
| 32 | HbA1c ≥7.5%                                                                        | 11.12 (2.08)    | -               | -               | 11.38 (2.08)     | 0.26 (-0.45; 0.97)             |
| 33 | < 12 years                                                                         | 11.87 (2.07)    | -               | -               | 11.9 (2.31)      | 0.03 (-0.90; 0.96)             |
| 34 | ≥ 12 years                                                                         | 11.59 (2.16)    | -               | -               | 12.21 (1.67)     | 0.62 (-0.001; 1.2)             |
| 35 | <b>Diabetes Treatment Satisfaction Questionnaire (DTSQ)</b>                        |                 |                 |                 |                  |                                |
| 36 | <b>Perceived hyperglycemia, mean (SD)</b>                                          |                 |                 |                 |                  |                                |
| 37 | Total                                                                              | 3.53 (1.51)     | -               | -               | 3.32 (1.44)      | -0.21 (-0.58; 0.16)            |
| 38 | HbA1c <7.5%                                                                        | 2.94 (1.28)     | -               | -               | 2.88 (1.44)      | -0.06 (-0.57; 0.45)            |
| 39 | HbA1c ≥7.5%                                                                        | 4.01 (1.51)     | -               | -               | 3.71 (1.34)      | -0.3 (-0.79; 0.19)             |
| 40 | < 12 years                                                                         | 3.62 (1.38)     | -               | -               | 3.44 (1.48)      | -0.18 (-0.79; 0.43)            |
| 41 | ≥ 12 years                                                                         | 3.48 (1.57)     | -               | -               | 3.25 (1.42)      | -0.23 (-0.71; 0.25)            |
| 42 | <b>Perceived hypoglycemia, mean (SD)</b>                                           |                 |                 |                 |                  |                                |
| 43 | Total                                                                              | 2.22 (1.35)     | -               | -               | 2.04 (1.32)      | -0.18 (-0.52; 0.16)            |
| 44 | HbA1c <7.5%                                                                        | 2.3 (1.36)      | -               | -               | 2 (1.31)         | -0.3 (-0.80; 0.20)             |
| 45 | HbA1c ≥7.5%                                                                        | 2.15 (1.35)     | -               | -               | 2.07 (1.34)      | -0.08 (-0.54; 0.38)            |
| 46 | < 12 years                                                                         | 2.19 (1.17)     | -               | -               | 2.05 (1.26)      | -0.14 (-0.66; 0.38)            |
| 47 | ≥ 12 years                                                                         | 2.23 (1.44)     | -               | -               | 2.03 (1.36)      | -0.2 (-0.64; 0.24)             |
| 48 | <b>Satisfaction with treatment, mean (SD)</b>                                      |                 |                 |                 |                  |                                |
| 49 | Total                                                                              | 25.89 (6.7)     | -               | -               | 29.82 (5.44)     | 3.93 (2.4; 5.5)                |
| 50 | HbA1c <7.5%                                                                        | 26.58 (7.04)    | -               | -               | 29.78 (5.1)      | 3.2 (0.86; 5.5)                |
| 51 | HbA1c ≥7.5%                                                                        | 25.33 (6.41)    | -               | -               | 29.86 (5.77)     | 4.53 (2.4; 6.6)                |
| 52 | < 12 years                                                                         | 25.79 (6.71)    | -               | -               | 29.61 (5.87)     | 3.82 (1.1; 6.5)                |
| 53 | ≥ 12 years                                                                         | 25.95 (6.73)    | -               | -               | 29.96 (5.21)     | 4.01 (2.1; 5.9)                |
| 54 |                                                                                    | <b>Baseline</b> | <b>3 months</b> | <b>6 months</b> | <b>12 months</b> | <b>Differences 12-3 months</b> |
| 55 | <b>Sensor usage time (%), mean (SD)</b>                                            |                 |                 |                 |                  |                                |
| 56 | Total                                                                              | -               | 81.60 (20.78)   | 84.42 (19.47)   | 88.55 (18.48)    | 6.95 (2.3; 11.6)               |
| 57 | HbA1c <7.5%                                                                        | -               | 83.99 (21.93)   | 86.60 (17.2)    | 91.70 (15.09)    | 7.71 (0.90; 14.5)              |
| 58 | HbA1c ≥7.5%                                                                        | -               | 79.63 (19.69)   | 82.57 (21.16)   | 86.01 (20.57)    | 6.38 (-0.8; 12.8)              |
| 59 | < 12 years                                                                         | -               | 87.59 (15.06)   | 90.60 (14.34)   | 94.51 (11.81)    | 6.92 (1.5; 12.3)               |
| 60 |                                                                                    |                 |                 |                 |                  |                                |

|                                           |   |               |               |               |                   |
|-------------------------------------------|---|---------------|---------------|---------------|-------------------|
| ≥ 12 years                                | - | 78.45 (22.67) | 81.09 (21.07) | 84.85 (20.84) | 6.4 (-0.14; 12.9) |
| <b>Number of scans per day, mean (SD)</b> |   |               |               |               |                   |
| Total                                     | - | 9.16 (5.06)   | 9.33 (4.97)   | 9.84 (6.02)   | 0.68 (-0.64; 2.0) |
| HbA1c <7.5%                               | - | 10.06 (5.11)  | 9.89 (5.07)   | 10.39 (5.45)  | 0.33 (-1.6; 2.2)  |
| HbA1c ≥7.5%                               | - | 8.41 (4.92)   | 8.85 (4.86)   | 9.39 (6.46)   | 0.98 (-0.87; 2.8) |
| < 12 years                                | - | 11.67 (5.64)  | 11.27 (4.5)   | 12.96 (6.45)  | 1.29 (-1.1; 3.7)  |
| ≥ 12 years                                | - | 7.83 (4.17)   | 8.27 (4.91)   | 7.90 (4.85)   | 0.07 (-1.3; 1.4)  |
| <b>Number of sensors used, mean (SD)</b>  |   |               |               |               |                   |
| Total                                     | - | 6.40 (1.36)   | 7.50 (2.86)   | 14.74 (5.81)  | 8.34 (7.4; 9.3)   |
| HbA1c <7.5%                               | - | 6.32 (1.37)   | 6.86 (1.76)   | 13.35 (4.47)  | 7.03 (5.9; 8.2)   |
| HbA1c ≥7.5%                               | - | 6.46 (1.36)   | 8.05 (3.46)   | 15.86 (6.51)  | 9.4 (7.9; 10.9)   |
| < 12 years                                | - | 6.63 (1.17)   | 6.90 (2.15)   | 14.73 (5.83)  | 8.1 (6.5; 7.8)    |
| ≥ 12 years                                | - | 6.28 (1.44)   | 7.83 (3.15)   | 14.75 (5.83)  | 8.47 (7.3; 9.7)   |

SD = standard deviation; VAS = Visual Analogue Scale; HbA1c = Glycosylated Haemoglobin; CI = Confidence Interval; GT = glucose time.

Appendix 5. Multivariate Mixed Regression Model for Effectiveness Measures and Adherence

**Table 1. Multivariate Mixed Regression Model for Effectiveness Measures**

| Variable                                                        | Self-reported severe hypoglycaemia events                    |      |                                                        |             | Severe hypoglycaemic events in the clinical history          |      |                                                        |             | Visual analogue scale (EQ-5D-Y) |             |                     |      |                      |             | Knowledge about DM1  |                 | Diabetes Treatment Satisfaction Questionnaire    |                 |                                                 |      |                                                     |             |  |
|-----------------------------------------------------------------|--------------------------------------------------------------|------|--------------------------------------------------------|-------------|--------------------------------------------------------------|------|--------------------------------------------------------|-------------|---------------------------------|-------------|---------------------|------|----------------------|-------------|----------------------|-----------------|--------------------------------------------------|-----------------|-------------------------------------------------|------|-----------------------------------------------------|-------------|--|
|                                                                 | Patients with hypoglycaemia (Yes/No)<br>Total sample (n=156) |      | Number of self-reported events<br>Total sample (n=156) |             | Patients with hypoglycaemia (Yes/No)<br>Total sample (n=156) |      | Number of self-reported events<br>Total sample (n=156) |             | Total sample (n=156)            |             | HbA1c <7.5% (n=68)  |      | HbA1c ≥7.5% (n=88)   |             | Total sample (n=156) |                 | Perceived hyperglycaemia<br>Total sample (n=156) |                 | Perceived hypoglycaemia<br>Total sample (n=156) |      | Satisfaction with treatment<br>Total sample (n=156) |             |  |
|                                                                 | OR (95%CI)                                                   | P    | β (95%CI)                                              | P           | OR (95%CI)                                                   | P    | β (95%CI)                                              | P           | B (95%CI)                       | P           | B (95%CI)           | P    | B (95%CI)            | P           | B (95%CI)            | P               | B (95%CI)                                        | P               | B (95%CI)                                       | P    | B (95%CI)                                           | P           |  |
| <b>Time</b>                                                     |                                                              |      |                                                        |             |                                                              |      |                                                        |             |                                 |             |                     |      |                      |             |                      |                 |                                                  |                 |                                                 |      |                                                     |             |  |
| M12 (ref: M0)                                                   | 0.82 (0.35; 1.96)                                            | .659 | -0.37 (-0.62; -0.11)                                   | <b>.004</b> | 1.47 (0.32; 6.77)                                            | .617 | 0.77 (-0.06; 1.60)                                     | .069        | -1.40 (-4.97; 2.16)             | .440        | -1.33 (-4.17; 1.51) | .359 | -6.03 (-9.66; -2.41) | <b>.001</b> | 0.45 (-0.17; 1.08)   | .154            | -0.08 (-0.50; 0.34)                              | .721            | -0.23 (-0.70; 0.24)                             | .331 | 3.11 (0.99; 5.23)                                   | <b>.004</b> |  |
| <b>Duration of T1DM</b>                                         | 1.01 (0.89; 1.15)                                            | .850 | -0.01 (-0.14; 0.12)                                    | .922        | 0.97 (0.81; 1.18)                                            | .806 | -0.05 (-0.24; 0.14)                                    | .587        | -0.74 (-1.29; -0.19)            | <b>.008</b> | -0.32 (-0.99; 0.35) | .348 | -1.05 (-1.86; -0.24) | <b>.011</b> | 0.01 (-0.08; 0.09)   | .851            | -0.003 (-0.06; 0.05)                             | .915            | -0.005 (-0.07; 0.06)                            | .870 | 0.05 (-0.18; 0.29)                                  | .650        |  |
| <b>Presence of comorbidities</b>                                | 0.81 (0.33; 1.98)                                            | .641 | 0.26 (-0.60; 1.12)                                     | .556        | 0.81 (0.26; 2.50)                                            | .710 | 0.27 (-0.83; 1.38)                                     | .624        | 0.87 (-2.91; 4.64)              | .652        | 2.42 (-1.78; 6.63)  | .259 | -1.04 (-6.98; 4.89)  | .731        | 0.02 (-0.52; 0.57)   | .930            | -0.005 (-0.43; 0.42)                             | .980            | 0.02 (-0.36; 0.41)                              | .91  | -0.52 (-2.15; 1.11)                                 | .534        |  |
| <b>Age group: ≥12 years (ref: &lt;12 years)</b>                 | 0.56 (0.22; 1.42)                                            | .221 | -0.15 (-1.04; 0.75)                                    | .745        | 1.32 (0.39; 4.44)                                            | .651 | 0.32 (-0.87; 1.50)                                     | .599        | -3.11 (-6.99; 0.78)             | .117        | -3.84 (-8.61; 0.94) | .115 | -2.82 (-8.49; 2.83)  | .327        | -0.09 (-0.67; 0.48)  | .705            | -0.05 (0.48; 0.38)                               | .819            | -0.002 (-0.38; 0.37)                            | .99  | -0.02 (-3.24; 0.76)                                 | .980        |  |
| <b>Baseline HbA1c group: ≥7.5% (ref: HbA1c &lt;7.5%)</b>        | 0.41 (0.15; 1.17)                                            | .097 | -0.57 (-1.40; 0.26)                                    | .176        | 2.17 (0.53; 8.88)                                            | .280 | 1.54 (0.31; 2.77)                                      | <b>.014</b> | -1.93 (-5.98; 2.11)             | .349        |                     |      |                      |             | -1.27 (-1.89; 0.65)  | <b>&lt;.001</b> | 1.06 (0.60; 1.52)                                | <b>&lt;.001</b> | -0.12 (-0.57; 0.33)                             | .593 | -1.24 (-1.34; 4.22)                                 | .225        |  |
| <b>Time*Baseline HbA1c Group (ref: M0 &amp; HbA1c &lt;7.5%)</b> |                                                              |      |                                                        |             |                                                              |      |                                                        |             |                                 |             |                     |      |                      |             |                      |                 |                                                  |                 |                                                 |      |                                                     |             |  |
| M12 & HbA1c ≥7.5%                                               | 2.69 (0.81; 8.96)                                            | .108 | 0.30 (-0.08; 0.68)                                     | .117        | 2.01 (0.34; 11.68)                                           | .437 | -0.44 (-1.33; 0.45)                                    | .333        | -4.61 (-9.44; 0.21)             | <b>.061</b> |                     |      |                      |             | -0.06 (-0.90; 0.78)  | .892            | -0.11 (-0.70; 0.48)                              | .703            | 0.16 (-0.46; 0.78)                              | .615 | 1.44 (-1.34; 4.22)                                  | .310        |  |

|                  |                         |      |                           |      |                          |                 |                            |                 |                            |                 |                            |                 |                            |                 |                            |                 |                         |                 |                         |                 |                            |                 |
|------------------|-------------------------|------|---------------------------|------|--------------------------|-----------------|----------------------------|-----------------|----------------------------|-----------------|----------------------------|-----------------|----------------------------|-----------------|----------------------------|-----------------|-------------------------|-----------------|-------------------------|-----------------|----------------------------|-----------------|
| <b>Intercept</b> | 0.78<br>(0.27;<br>2.23) | .641 | -0.78<br>(-1.74;<br>0.17) | .107 | 0.03<br>(0.004;<br>0.19) | <b>&lt;.001</b> | -4.32<br>(-5.97;<br>-2.67) | <b>&lt;.001</b> | 90.50<br>(86.13;<br>94.87) | <b>&lt;.001</b> | 90.44<br>(85.92;<br>94.96) | <b>&lt;.001</b> | 88.92<br>(83.96;<br>93.88) | <b>&lt;.001</b> | 12.43<br>(11.78;<br>13.07) | <b>&lt;.001</b> | 2.98<br>(2.49;<br>3.46) | <b>&lt;.001</b> | 2.29<br>(1.84;<br>2.74) | <b>&lt;.001</b> | 26.80<br>(24.80;<br>28.81) | <b>&lt;.001</b> |
|------------------|-------------------------|------|---------------------------|------|--------------------------|-----------------|----------------------------|-----------------|----------------------------|-----------------|----------------------------|-----------------|----------------------------|-----------------|----------------------------|-----------------|-------------------------|-----------------|-------------------------|-----------------|----------------------------|-----------------|

CI = Confidence Interval; HbA1c = Glycosylated Haemoglobin; M = Months; OR = Odds Ratio; ref = reference.

**Table 2. Multivariate Mixed Regression Model for Adherence**

| Variable                                                 | Sensor usage time, %     |                 | Number of scans per day |                 | Number of sensors used |                 |                           |                 |                           |                 |
|----------------------------------------------------------|--------------------------|-----------------|-------------------------|-----------------|------------------------|-----------------|---------------------------|-----------------|---------------------------|-----------------|
|                                                          | Total sample (n=156)     |                 | Total sample (n=156)    |                 | Total sample (n=156)   |                 | HbA1c basal < 7.5% (n=68) |                 | HbA1c basal ≥ 7.5% (n=88) |                 |
|                                                          | B (95%CI)                | P               | B (95%CI)               | P               | B (95%CI)              | P               | B (95%CI)                 | P               | B (95%CI)                 | P               |
| <b>Time</b>                                              |                          |                 |                         |                 |                        |                 |                           |                 |                           |                 |
| M6 (ref: M3)                                             | 1.82<br>(-3.31; 6.98)    | .487            | -0.25<br>(-1.41; 0.92)  | .678            | 0.49<br>(-0.58; 1.56)  | .367            | 0.51<br>(-0.37; 1.39)     | .255            | 1.59<br>(0.48; 2.70)      | <b>.005</b>     |
| M12 (ref: M3)                                            | 6.42<br>(1.12; 11.72)    | <b>.018</b>     | 0.30<br>(-0.91; 1.51)   | .625            | 6.96<br>(5.85; 8.06)   | <b>&lt;.001</b> | 6.97<br>(6.06; 7.87)      | <b>&lt;.001</b> | 9.37<br>(8.25; 10.50)     | <b>&lt;.001</b> |
| <b>Duration of T1DM</b>                                  | -1.02<br>(-1.77; -0.27)  | <b>.008</b>     | -0.08<br>(-0.29; 0.13)  | .468            | -0.06<br>(-0.20; 0.07) | .363            | -0.11<br>(-0.25; 0.04)    | .152            | -0.03<br>(-0.24; 0.18)    | .804            |
| <b>Presence of comorbidities</b>                         | 0.53<br>(-4.61; 5.66)    | .840            | -0.69<br>(-2.14; 0.75)  | .348            | -0.35<br>(-1.27; 0.56) | .453            | -0.25<br>(-1.16; 0.66)    | .585            | -0.39<br>(-1.92; 1.14)    | .617            |
| <b>Age group: ≥12 years</b> (ref: <12 years)             | -7.93<br>(-13.19; -2.66) | <b>.003</b>     | -3.92<br>(-5.40; -2.43) | <b>&lt;.001</b> | 0.39<br>(-0.55; 1.33)  | .417            | 0.03<br>(-0.98; 1.05)     | .952            | 0.69<br>(-0.77; 2.14)     | .354            |
| <b>Baseline HbA1c group: ≥7.5%</b> (ref: HbA1c <7.5%)    | -4.59<br>(-10.71; 1.53)  | .142            | -1.92<br>(-3.52; -0.31) | <b>.019</b>     | 0.12<br>(-1.04; 1.29)  | .836            |                           |                 |                           |                 |
| <b>Time*Baseline HbA1c Group</b> (ref: M3 & HbA1c <7.5%) |                          |                 |                         |                 |                        |                 |                           |                 |                           |                 |
| M6 & HbA1c ≥7.5%                                         | 0.38<br>(-6.58; 7.33)    | .915            | 0.43<br>(-1.14; 2.01)   | .590            | 1.09<br>(-0.36; 2.54)  | .141            |                           |                 |                           |                 |
| M12 & HbA1c ≥7.5%                                        | -1.35<br>(-8.48; 5.77)   | .710            | 0.35<br>(-1.28; 1.97)   | .676            | 2.41<br>(0.93; 3.90)   | <b>.001</b>     |                           |                 |                           |                 |
| <b>Intercept</b>                                         | 89.10<br>(82.9; 95.3)    | <b>&lt;.001</b> | 13.0<br>(11.32; 14.68)  | <b>&lt;.001</b> | 6.19<br>(5.04; 7.33)   | <b>&lt;.001</b> | 6.39<br>(5.34; 7.44)      | <b>&lt;.001</b> | 6.13<br>(4.77; 7.49)      | <b>&lt;.001</b> |

CI = Confidence Interval; HbA1c = Glycosylated Haemoglobin; M = Months; ref = reference.



STROBE Statement—Checklist of items that should be included in reports of *cohort studies*

|                              | Item No | Recommendation                                                                                                                                                                                                                                                                                                         | Page No                        |
|------------------------------|---------|------------------------------------------------------------------------------------------------------------------------------------------------------------------------------------------------------------------------------------------------------------------------------------------------------------------------|--------------------------------|
| <b>Title and abstract</b>    | 1       | (a) Indicate the study's design with a commonly used term in the title or the abstract<br>(b) Provide in the abstract an informative and balanced summary of what was done and what was found                                                                                                                          | 1<br>1                         |
| <b>Introduction</b>          |         |                                                                                                                                                                                                                                                                                                                        |                                |
| Background/rationale         | 2       | Explain the scientific background and rationale for the investigation being reported                                                                                                                                                                                                                                   | 3                              |
| Objectives                   | 3       | State specific objectives, including any prespecified hypotheses                                                                                                                                                                                                                                                       | 3                              |
| <b>Methods</b>               |         |                                                                                                                                                                                                                                                                                                                        |                                |
| Study design                 | 4       | Present key elements of study design early in the paper                                                                                                                                                                                                                                                                | 4                              |
| Setting                      | 5       | Describe the setting, locations, and relevant dates, including periods of recruitment, exposure, follow-up, and data collection                                                                                                                                                                                        | 4                              |
| Participants                 | 6       | (a) Give the eligibility criteria, and the sources and methods of selection of participants. Describe methods of follow-up<br>(b) For matched studies, give matching criteria and number of exposed and unexposed                                                                                                      | 4                              |
| Variables                    | 7       | Clearly define all outcomes, exposures, predictors, potential confounders, and effect modifiers. Give diagnostic criteria, if applicable                                                                                                                                                                               | 4-5                            |
| Data sources/<br>measurement | 8*      | For each variable of interest, give sources of data and details of methods of assessment (measurement). Describe comparability of assessment methods if there is more than one group                                                                                                                                   | 5                              |
| Bias                         | 9       | Describe any efforts to address potential sources of bias                                                                                                                                                                                                                                                              | 5                              |
| Study size                   | 10      | Explain how the study size was arrived at                                                                                                                                                                                                                                                                              | 5                              |
| Quantitative variables       | 11      | Explain how quantitative variables were handled in the analyses. If applicable, describe which groupings were chosen and why                                                                                                                                                                                           |                                |
| Statistical methods          | 12      | (a) Describe all statistical methods, including those used to control for confounding<br>(b) Describe any methods used to examine subgroups and interactions<br>(c) Explain how missing data were addressed<br>(d) If applicable, explain how loss to follow-up was addressed<br>(e) Describe any sensitivity analyses | 5-6<br>5-6<br>5-6<br>5-6<br>NA |
| <b>Results</b>               |         |                                                                                                                                                                                                                                                                                                                        |                                |
| Participants                 | 13*     | (a) Report numbers of individuals at each stage of study—eg numbers potentially eligible, examined for eligibility, confirmed eligible, included in the study, completing follow-up, and analysed<br>(b) Give reasons for non-participation at each stage<br>(c) Consider use of a flow diagram                        | 7<br>7<br>7                    |
| Descriptive data             | 14*     | (a) Give characteristics of study participants (eg demographic, clinical, social) and information on exposures and potential confounders<br>(b) Indicate number of participants with missing data for each variable of interest<br>(c) Summarise follow-up time (eg, average and total amount)                         | 7<br>Apex 1<br>7               |
| Outcome data                 | 15*     | Report numbers of outcome events or summary measures over time                                                                                                                                                                                                                                                         | 8                              |

|    |                          |    |                                                                                                                                                                                                              |       |
|----|--------------------------|----|--------------------------------------------------------------------------------------------------------------------------------------------------------------------------------------------------------------|-------|
| 1  | Main results             | 16 | (a) Give unadjusted estimates and, if applicable, confounder-adjusted estimates and their precision (eg, 95% confidence interval). Make clear which confounders were adjusted for and why they were included | 8     |
| 2  |                          |    | (b) Report category boundaries when continuous variables were categorized                                                                                                                                    | 8     |
| 3  |                          |    | (c) If relevant, consider translating estimates of relative risk into absolute risk for a meaningful time period                                                                                             | NA    |
| 4  | Other analyses           | 17 | Report other analyses done—eg analyses of subgroups and interactions, and sensitivity analyses                                                                                                               | 9     |
| 5  | <b>Discussion</b>        |    |                                                                                                                                                                                                              |       |
| 6  | Key results              | 18 | Summarise key results with reference to study objectives                                                                                                                                                     | 10-11 |
| 7  | Limitations              | 19 | Discuss limitations of the study, taking into account sources of potential bias or imprecision. Discuss both direction and magnitude of any potential bias                                                   | 10-11 |
| 8  | Interpretation           | 20 | Give a cautious overall interpretation of results considering objectives, limitations, multiplicity of analyses, results from similar studies, and other relevant evidence                                   | 10-11 |
| 9  | Generalisability         | 21 | Discuss the generalisability (external validity) of the study results                                                                                                                                        | 10-11 |
| 10 | <b>Other information</b> |    |                                                                                                                                                                                                              |       |
| 11 | Funding                  | 22 | Give the source of funding and the role of the funders for the present study and, if applicable, for the original study on which the present article is based                                                | 15    |

\*Give information separately for exposed and unexposed groups.

**Note:** An Explanation and Elaboration article discusses each checklist item and gives methodological background and published examples of transparent reporting. The STROBE checklist is best used in conjunction with this article (freely available on the Web sites of PLoS Medicine at <http://www.plosmedicine.org/>, Annals of Internal Medicine at <http://www.annals.org/>, and Epidemiology at <http://www.epidem.com/>). Information on the STROBE Initiative is available at <http://www.strobe-statement.org>.

# BMJ Open

## Effectiveness, safety and costs of the FreeStyle Libre Glucose Monitoring System for children and adolescents with T1DM in Spain: a prospective uncontrolled pre-post study

|                                 |                                                                                                                                                                                                                                                                                                                                                                                                                                                                                                                                                                                                                                                                                                                                                                                                                                                                                                                                                                                                                      |
|---------------------------------|----------------------------------------------------------------------------------------------------------------------------------------------------------------------------------------------------------------------------------------------------------------------------------------------------------------------------------------------------------------------------------------------------------------------------------------------------------------------------------------------------------------------------------------------------------------------------------------------------------------------------------------------------------------------------------------------------------------------------------------------------------------------------------------------------------------------------------------------------------------------------------------------------------------------------------------------------------------------------------------------------------------------|
| Journal:                        | <i>BMJ Open</i>                                                                                                                                                                                                                                                                                                                                                                                                                                                                                                                                                                                                                                                                                                                                                                                                                                                                                                                                                                                                      |
| Manuscript ID                   | bmjopen-2022-071334.R2                                                                                                                                                                                                                                                                                                                                                                                                                                                                                                                                                                                                                                                                                                                                                                                                                                                                                                                                                                                               |
| Article Type:                   | Original research                                                                                                                                                                                                                                                                                                                                                                                                                                                                                                                                                                                                                                                                                                                                                                                                                                                                                                                                                                                                    |
| Date Submitted by the Author:   | 05-Oct-2023                                                                                                                                                                                                                                                                                                                                                                                                                                                                                                                                                                                                                                                                                                                                                                                                                                                                                                                                                                                                          |
| Complete List of Authors:       | González-Pacheco, Himar; Fundacion Canaria Instituto de Investigacion Sanitaria de Canarias<br>Rivero-Santana, Amado ; Fundacion Canaria Instituto de Investigacion Sanitaria de Canarias<br>Ramallo Farina, Yolanda; Fundación Canaria Instituto de Investigación Sanitaria de Canarias<br>Valcárcel-Nazco, Cristina; Fundacion Canaria Instituto de Investigacion Sanitaria de Canarias<br>Álvarez-Pérez, Yolanda; Fundacion Canaria Instituto de Investigacion Sanitaria de Canarias<br>García-Pérez, Lidia; Fundacion Canaria Instituto de Investigacion Sanitaria de Canarias, Servicio de Evaluación del Servicio Canario de la Salud (SESCS)<br>García-Bello, Miguel Angel; Fundacion Canaria Instituto de Investigacion Sanitaria de Canarias<br>Perestelo-Pérez, Lilisbeth; Servicio de Evaluación y Planificación del Servicio Canario de la Salud<br>Serrano-Aguilar, Pedro; Servicio de Evaluación y Planificación del Servicio Canario de la Salud<br>Group, Health Professional; Hospital Severo Ochoa |
| <b>Primary Subject Heading</b>: | Diabetes and endocrinology                                                                                                                                                                                                                                                                                                                                                                                                                                                                                                                                                                                                                                                                                                                                                                                                                                                                                                                                                                                           |
| Secondary Subject Heading:      | Diabetes and endocrinology, Public health                                                                                                                                                                                                                                                                                                                                                                                                                                                                                                                                                                                                                                                                                                                                                                                                                                                                                                                                                                            |
| Keywords:                       | Paediatric endocrinology < DIABETES & ENDOCRINOLOGY, PUBLIC HEALTH, Health economics < HEALTH SERVICES ADMINISTRATION & MANAGEMENT                                                                                                                                                                                                                                                                                                                                                                                                                                                                                                                                                                                                                                                                                                                                                                                                                                                                                   |
|                                 |                                                                                                                                                                                                                                                                                                                                                                                                                                                                                                                                                                                                                                                                                                                                                                                                                                                                                                                                                                                                                      |

SCHOLARONE™  
Manuscripts

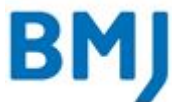

I, the Submitting Author has the right to grant and does grant on behalf of all authors of the Work (as defined in the below author licence), an exclusive licence and/or a non-exclusive licence for contributions from authors who are: i) UK Crown employees; ii) where BMJ has agreed a CC-BY licence shall apply, and/or iii) in accordance with the terms applicable for US Federal Government officers or employees acting as part of their official duties; on a worldwide, perpetual, irrevocable, royalty-free basis to BMJ Publishing Group Ltd ("BMJ") its licensees and where the relevant Journal is co-owned by BMJ to the co-owners of the Journal, to publish the Work in this journal and any other BMJ products and to exploit all rights, as set out in our [licence](#).

The Submitting Author accepts and understands that any supply made under these terms is made by BMJ to the Submitting Author unless you are acting as an employee on behalf of your employer or a postgraduate student of an affiliated institution which is paying any applicable article publishing charge ("APC") for Open Access articles. Where the Submitting Author wishes to make the Work available on an Open Access basis (and intends to pay the relevant APC), the terms of reuse of such Open Access shall be governed by a Creative Commons licence – details of these licences and which [Creative Commons](#) licence will apply to this Work are set out in our licence referred to above.

Other than as permitted in any relevant BMJ Author's Self Archiving Policies, I confirm this Work has not been accepted for publication elsewhere, is not being considered for publication elsewhere and does not duplicate material already published. I confirm all authors consent to publication of this Work and authorise the granting of this licence.

## Effectiveness, safety and costs of the FreeStyle Libre Glucose Monitoring System for children and adolescents with T1DM in Spain: a prospective uncontrolled pre-post study

### Author names and affiliations

Himar González-Pacheco<sup>1,2,3,4</sup>, Amado Rivero-Santana<sup>1,2,3,4</sup>, Yolanda Ramallo-Fariña<sup>1,2,3,4</sup>, Cristina Valcárcel-Nazco<sup>1,2,3,4</sup>, Yolanda Álvarez-Pérez<sup>1,2,3,4</sup>, Lidia García-Pérez<sup>1,2,3,4</sup>, Miguel Ángel García-Bello<sup>1,2,3,4</sup>, Lilisbeth Perestelo-Pérez<sup>1,2,3,4,5</sup>, Pedro Serrano-Aguilar<sup>1,2,3,4,5</sup>, Health Professional Group.

1. Canary Islands Health Research Institute Foundation (FIISC), Tenerife, Spain
2. Spanish Network of Agencies for Assessing National Health System Technologies and Performance (RedETS), Spain
3. Network for Research on Chronicity, Primary Care, and Health Promotion (RICAPPS), Tenerife, Spain
4. Institute of Biomedical Technologies (ITB), Tenerife, Spain
5. Evaluation Unit (SESCS), Canary Islands Health Services (SCS), Tenerife, Spain

### Corresponding author

Himar González Pacheco

[Himar.gonzalezpacheco@sescs.es](mailto:Himar.gonzalezpacheco@sescs.es)

### Abstract

#### Objectives

Evaluate the effectiveness, safety and costs of FreeStyle Libre® (FSL) for Type 1 Diabetes Mellitus (T1DM) in underage.

#### Design

Prospective multicentre pre-post study.

#### Setting

Patients were recruited from thirteen Spanish public hospitals between January 2019 and March 2020 and followed up for 12 months.

#### Participants

156 patients were included.

#### Primary and secondary outcome measures

Primary outcome: HbA1c change. Secondary measures: severe hypoglycaemic events (self-reported and clinical records), quality of life, diabetes treatment knowledge, treatment satisfaction, adverse events, adherence, sensor usage time and scans. Healthcare resource utilization was assessed for cost analysis from the National Health System (NHS) perspective, incorporating direct healthcare costs. Data analysis utilized mixed regression models with repeated measures. Intervention's total cost estimated by multiplying health resource usage with unit costs.

#### Results

In the whole sample, HbA1c increased significantly (0.32%; 95%CI: 0.10, 0.55). In the subgroup with baseline HbA1c $\geq$ 7.5% (n=88), there was a significant reduction at 3 (-0.46%; -0.69, -0.23), 6 (-0.49%; -0.73, -0.25), and 12 months (-0.43%; -0.68, -0.19). Well-controlled patients revealed a significant 12-month worsening (0.32%; 0.18, 0.47). Self-reported severe hypoglycaemia significantly decreased compared to the previous year for the whole sample (-0.37; -0.62, -0.11). Quality of life and diabetes treatment knowledge showed no significant differences, but satisfaction increased. Adolescents had lower sensor usage time and scans than children. The reduction in

1  
2  
3  
4 HbA1c was significantly associated with device adherence. No serious adverse effects were observed. Using FSL  
5 could reduce healthcare and productivity losses related costs.  
6

#### 7 **Conclusions**

8 The use of FSL in underage T1DM patients is associated with a significant reduction in severe hypoglycaemia and  
9 improved HbA1c levels in patients with poor baseline control. Findings suggest cost savings and productivity  
10 gains for caregivers. Causal evidence is limited due to the study design. Further research needed to confirm  
11 results and assess risks, especially for lower HbA1c patients.  
12  
13

#### 14 **Strengths and limitations of this study**

- 15 - This study provides nationally contextualised real-world scientific evidence on the effectiveness, safety and  
16 costs of the flash glucose monitoring systems (FreeStyle Libre® system [FSL]) indicated for DM1 in childhood and  
17 adolescence in Spain.
- 18 - The study utilized a combination of self-reported outcomes, clinical data extracted from Electronic Health  
19 Records (EHR), and device-stored information from the FSL device, which provides a robust and multifaceted  
20 assessment of the outcomes.
- 21 - The uncontrolled design of the study precludes causal inferences and results from randomized trials are needed  
22 to draw definitive conclusions.
- 23 - The small sample size limit the generalizability and statistical power of the findings.
- 24 - The cost estimation analysis only considered direct healthcare costs from the Spanish National Health System  
25 perspective, and indirect costs were not fully taken into account, which may underestimate the overall economic  
26 impact of the intervention.  
27

#### 28 **Keywords**

29 Continuous glucose monitoring, HbA1c, Type 1 diabetes, costs, Spain.  
30  
31

32 **Word count** 4866  
33  
34  
35  
36  
37  
38  
39  
40  
41  
42  
43  
44  
45  
46  
47  
48  
49  
50  
51  
52  
53  
54  
55  
56  
57  
58  
59  
60

## Introduction

Type 1 Diabetes Mellitus (T1DM) requires continuous medical monitoring, to reduce the development of vascular complications [1,2]. The early onset and chronic character of this condition increase the likelihood of reducing health-related quality of life (HRQoL) and health expectancy among young T1DM people [3]. A total of 586,000 children aged under 15 years suffer from T1DM globally [4]. In Spain, the incidence is 11.5-27.6/100,000[5], which represents a high cost to society [6].

To reduce the risk of short (metabolic) and long-term (vascular) diabetes complications, frequent determination of blood glucose levels is required. Continuous glucose monitoring systems, such as the flash glucose monitoring (FGM) systems, contribute to glycaemia monitoring, as well as to reduce the daily number of fingersticks [7], providing dynamic information to the users about their glucose level. FreeStyle Libre® (FSL), developed and marketed in Spain by Abbott Laboratories, has been indicated to measure glucose levels in the interstitial fluid in people aged over four years with T1DM. No serious adverse effects related to the use of these devices have been reported. Mild effects consist of skin problems in the area where the sensor is inserted, similar to other FGM [8,9].

In randomized trials, the FSL system has been shown to significantly reduce HbA1c levels and the frequency of hypoglycaemia in patients with T2DM, compared to the conventional finger-pricking method [10]. In T1DM, most published studies had an uncontrolled design, and meta-analyses have revealed that the use of FSL is associated with significant HbA1c reductions from baseline to the last follow up [11,12]. Approximately 30% of these studies included children and adolescents, which also led to obtaining significant pre-post HbA1c reductions. To the best of our knowledge, only one randomized trial has evaluated the FSL versus conventional glucose measurement in non-adults (13-20 years-old) with T1DM [13], showing no significant results on HbA1c or quality of life [13].

Spain has a universal public health system, financed by taxes. The system is highly decentralized and the 17 Spanish administrative regions have their own health policy budget, which enables a tailored approach to meet the specific needs and demands of each region. The competences and portfolio of the Spanish Ministry of Health encompass a wide range of responsibilities aimed at ensuring the well-being and health of the population. These include policy development, regulation and oversight of healthcare services, public health initiatives, pharmaceutical regulation, health technology assessment and coordination of emergency responses, among others. The Spanish Network of Health Technology Assessment Agencies of the National Health System (RedETS) [14], published a report in 2016 [15], later updated in 2017 [16], devised by the Canary Islands Health Service Evaluation Department (SESCS) [17], about the effectiveness, safety and cost-effectiveness of FSL in patients with T1DM and T2DM. In 2019, the Spanish Ministry of Health decided to fund FSL for adult T1DM patients [18], and in 2020 the reimbursement was extended to any insulin-dependent patient not diagnosed with T1DM or T2DM [19].

Regarding children and adolescents with T1DM, the Spanish Ministry of Health decided to perform a post-launch evidence generation study to provide real world information in the Spanish context on the effectiveness, safety, acceptability and potential use barriers, as well as on healthcare resources use and costs, to inform health policy decision-making on a national level in regard to coverage and public funding in these population groups [20,21]. This paper reports its results.

## Methods

### Study Design

Prospective multicentre pre-post study performed in 13 public hospitals throughout Spain (see **online supplemental Appendix 1**). Patients were recruited between January 2019 and March 2020, with a 12-month follow-up.

### Interventions

FSL consists of: 1) an arm sensor that measures and stores interstitial glucose levels, wearable for 14 days [22]; 2) a reader that obtains glucose readings from the sensor when placed at a distance between 1-4 cm, storing up to 90 days of glucose measures and user-entered notes. The Libre View<sup>®</sup> software and the FreeStyle Libre Link<sup>®</sup>, and LibreLinkUp<sup>®</sup> Apps enables obtaining reports with the daily patterns of glucose levels.

### Participants

Patients were eligible for inclusion if they were aged between 4 and 17, had been diagnosed with T1DM for at least one year prior to the study, were receiving intensive insulin therapy, required more than six fingersticks per day, and provided their informed consent to participate.

We excluded patients who had hypoglycaemia unawareness (judged by the clinician), were currently undergoing systemic corticosteroid treatment for more than two weeks within the last three months, had previously used or were currently using a FGM device within the last 12 months, were pregnant adolescents, had allergies to device adhesives, were unwilling to participate, lacked the necessary skills to effectively use the technology (patient/caregiver) or failed to provide informed consent.

### Setting, logistics and recruitment

The study protocol was devised by SESCO researchers with the assistance of clinical experts from all hospitals taking part, patient association and industry representatives. A centralized information system (SIEM) was developed on the Spanish Ministry of Health's intranet, accessible both for the clinical researchers responsible for recruitment, clinical examination and data collection, as well as SESCO researchers.

Clinical researchers from hospitals taking part were responsible for recruiting, informing and training both patients and caregivers. They collected self-reported data using various measurement scales and extracted clinical information from the electronic health record (EHR) at baseline, 3, 6, and 12 months. In addition, they retrieved the stored information from the FSL device during the follow-up phase (3, 6, and 12 months) on the SIEM platform. SESCO researchers were responsible for coordinating the project and supervising data collection, monitoring quality assurance and data validation, analyses and reporting.

Interested Spanish autonomous communities designated the hospitals they wished to take part in the study. Thirteen public hospitals were included between January 2019 and May 2020, distributed over eight Spanish autonomous communities.

### Endpoints

#### Effectiveness

The primary endpoint was the change in HbA1c level from baseline to follow up. Secondary endpoints included: 1) data extracted from the EHR at baseline and 3, 6 and 12 months: number of severe hypoglycaemia events (defined as those that require help from another person), ketoacidosis episodes, number of hospital admissions and mortality; and 2) self-reported outcomes evaluated at baseline and at 12 months follow-up, by means of the EQ-5D-Y questionnaire [23]; with five categories, reporting the level of severity, ranging from 1 ("I have no problems") to 5 ("I have a lot of problems") in terms of mobility, self-care, activities of daily living, pain/discomfort and anxiety/depression. Furthermore, a visual analogue scale (VAS) measured self-perceived general health, ranging from "0" (worst health status) to "100" (best health status).



1  
2  
3  
4 Knowledge of diabetes treatment was measured by means of a modified version of the questionnaire devised by  
5 Mitchell et al. [24]. This includes 14 items evaluating basic theoretical knowledge about the management of  
6 T1DM and its treatment, as well as the patient/caregiver's self-perceived involvement in self-care. The final score  
7 is the sum of correct answers (range 0-14). To measure satisfaction with treatment, we used the six-item  
8 Diabetes Treatment Satisfaction Questionnaire (DTSQ) [25]. Response options range from 0 (very dissatisfied) to  
9 6 (very satisfied) (range 0-36). Another two items measured the perceived frequency of hyperglycaemia and  
10 hypoglycaemia on a scale from 0 (never perceived) to 6 (most of the time).  
11  
12

### 13 **Safety**

14 Patients' self-reported device-related adverse events were collected at 3, 6 and 12-months of follow-up.  
15  
16

### 17 **Adherence**

18 To measure device adherence, the following variables were evaluated: 1) Number of daily scans; 2) Sensor usage  
19 time (percentage); and 3) Number of sensors used. These data were collected throughout the follow-up phase  
20 by means of the information stored in the device.  
21  
22

### 23 **Use of healthcare resources**

24 Data were extracted from the EHR at baseline and at 12-months of follow-up on: 1) Number of hospitalizations;  
25 2) Number of clinic visits (endocrinology, nursing, primary care/paediatrics, emergency); 3) Number of HbA1c  
26 assays; 4) Number of test strips and lancets used; and 5) Absenteeism from work (number of days the caregiver  
27 was absent from work due to problems related to the child's T1DM).  
28

29 In addition to these measures, information on age, sex, body mass index (BMI), time since diagnosis, presence  
30 of comorbidities and pubertal stage according to the Tanner scale [26], which classifies patients into 5 stages  
31 ranging from stage 1 (childhood) to 5 (adult), was systematically collected.  
32  
33

### 34 **Sample Size Calculation**

35 We estimated a sample size requirement of 43 participants to detect a minimal clinically relevant change in  
36 HbA1c of 0.5% [27], assuming 95% confidence level, 80% power, a HbA1c standard deviation of 1, a pre-post  
37 correlation of 0.5 (conservative assumption), and a loss rate of 20%. In addition to the main effect in the whole  
38 sample, we were also interested in the effect of the intervention on subgroups defined by their baseline HbA1c  
39 level (greater or less than 7.5%), and age (<12 vs. ≥12 years-old). However, the analysis of interactions requires  
40 larger sample sizes to attain statistical power, which was not feasible within the study's time limits. Therefore,  
41 we aimed to multiply the sample at least by 4 (n=172) to increase the statistical power as much as possible.  
42  
43

### 44 **Statistical analysis**

45 Means and standard deviation (SD) were estimated for continuous variables, and count and percentage for  
46 qualitative variables. Baseline characteristics of patients were compared using student-*t*, Pearson chi-square,  
47 Fisher's exact test or Cochran Q, according to the type of variables.  
48

49 Mixed regression models with repeated measures were used, adjusting for the interaction between time and  
50 baseline HbA1c (dichotomous variable) and age group, time and its main effects. The duration of the disease and  
51 the existence of comorbidities were included as covariates. A linear link function was used for continuous  
52 dependent variables, a logistic function for dichotomous dependent variables and a Poisson function for count  
53 dependent variables. In the models with significant interaction, mixed regression models were performed for  
54 each interaction subgroup.  
55

56 The relationship between adherence to the device and HbA1c reduction was analysed using two mixed linear  
57 regression models, whose independent variables were the percentage of time using the sensor (12 months) and  
58  
59  
60

1  
2  
3  
4 the number of monthly scans; basal HbA1c level was introduced as a covariable. Intercept was introduced as a  
5 random effect in all models.

6 For missing values during follow-up, a comparability analysis was conducted between participants lost to follow-  
7 up and those who remained, prior to performing multiple imputation by chained equations using Stata version  
8 15.0. The details of this comparability analysis and the imputation model can be found in **online supplemental**  
9 **Appendix 2**.

10 A level of 0.05 was considered statistically significant. Analyses were performed with the statistical software  
11 Stata V.15.0 [28] and SPSS V.20.0 [29].  
12  
13

#### 14 **Cost estimation**

15 Intervention costs were estimated from the Spanish National Health System (NHS) perspective, including only  
16 direct healthcare costs during the 12 months of the study. The healthcare resources collected in this study,  
17 together with the corresponding unit costs and their information sources, can be found in **Table A1 in online**  
18 **supplemental Appendix 3**. Costs were expressed as 2021 euros (€). When necessary, we adjusted for the  
19 consumer price index (CPI), using the Spanish Office of National Statistics (INE) – the INE's income conversion  
20 tool [30].  
21

22 Unit cost of test strips and lancets were estimated with the average costs of information provided by different  
23 regional health services of the Spanish NHS. Total costs were estimated multiplying the collected data on health  
24 resources used by their respective unit costs, and then added.

25 Descriptive statistics are presented for total costs aggregated and broken down into: primary care visits (nursing  
26 and physicians), emergency visits (hospital and non-hospitals), specialist physicians visits, laboratory tests (HbA1c  
27 assay) and monitoring instruments (FSL sensor and test strips and lancets).

28 Given the nature of the costs and their non-normal nature, confidence intervals were estimated using a non-  
29 parametric bootstrapping method [31]. Analyses were performed using the statistical software SPSS V.20.0 [29]  
30 with the help of Microsoft Excel.

31 In addition, although the social perspective was not taken into account in this estimate, indirect technology costs  
32 were reported using the human capital theory, i.e. considering the costs attributed to productivity losses of the  
33 parents or caregivers of the child with T1DM before and after one year of using the FSL.

34 To estimate the cost per day of absenteeism, the cost per hour worked in Spain published by the Statistical Office  
35 of the European Union (Eurostat) [32] was multiplied by the average number of daily working hours worked in  
36 Spain published in the INE's Labour Force Survey (LFS) [33].  
37  
38  
39

#### 40 **Patient and public involvement**

41 There was no patient involvement in the design of this study. Clinical experts from all participant hospitals,  
42 representatives of patient associations and the industry took part in drawing up the protocol. We undertook with  
43 healthcare professionals to share the results with them in an easy-to-understand way.  
44  
45  
46  
47  
48  
49  
50  
51  
52  
53  
54  
55  
56  
57  
58  
59  
60

## Results

A total of 165 patients were initially registered for the study. However, nine patients were subsequently excluded as they did not meet the study's inclusion criteria (see flow-chart in **Figure 1**). Therefore, the final analysis included a total of 156 patients.

### Figure 1. Flow-chart

Patients' baseline characteristics, are shown in **Table 1**, according to subgroups by level of metabolic control and age. There was a higher percentage of participants in stage 1 and 5 in the subgroup with worse glycaemic control ( $P=0.02$ ). In this subgroup, the mean HbA1c value was 8.7%; with 6.8% ( $P<0.001$ ) in the well-controlled group. Descriptive statistics obtained at each time point for the total sample and subgroups for each outcome measure can be found in **online supplemental Appendix 4**.

| Table 1. Baseline characteristics of patients according to baseline HbA1c control and age groups                                                                                                                                                                                                                                                                                                                            |                  |                       |                        |             |                     |                      |                 |
|-----------------------------------------------------------------------------------------------------------------------------------------------------------------------------------------------------------------------------------------------------------------------------------------------------------------------------------------------------------------------------------------------------------------------------|------------------|-----------------------|------------------------|-------------|---------------------|----------------------|-----------------|
|                                                                                                                                                                                                                                                                                                                                                                                                                             | Total<br>(n=156) | HbA1c <7.5%<br>(n=68) | HbA1c ≥7.5 %<br>(n=88) | P           | <12 years<br>(n=53) | ≥12 years<br>(n=103) | P               |
| <b>Anthropometric characteristics</b>                                                                                                                                                                                                                                                                                                                                                                                       |                  |                       |                        |             |                     |                      |                 |
| Sex (male) n (%)                                                                                                                                                                                                                                                                                                                                                                                                            | 86 (55.1)        | 35 (51.5)             | 51 (58)                | .419        | 28 (52.8)           | 58 (56.3)            | .679            |
| Age (years), mean (SD)                                                                                                                                                                                                                                                                                                                                                                                                      | 12.6 (3.2)       | 12.7 (2.84)           | 12.49 (3.39)           | .735        | NA                  | NA                   | NA              |
| Children < 12 years, n (%)                                                                                                                                                                                                                                                                                                                                                                                                  | 53 (34)          | 21 (30.9)             | 32 (36.4)              | .474        | NA                  | NA                   | NA              |
| BMI (kg/m <sup>2</sup> ), mean (SD)                                                                                                                                                                                                                                                                                                                                                                                         | 20.3 (4.1)       | 20.18 (3.34)          | 20.39 (4.54)           | .754        | NA                  | NA                   | NA              |
| <b>Pubertal status, n (%)</b>                                                                                                                                                                                                                                                                                                                                                                                               |                  |                       |                        | <b>.022</b> |                     |                      | <b>&lt;.001</b> |
| I                                                                                                                                                                                                                                                                                                                                                                                                                           | 51 (32.7)        | 19 (27.9)             | 32 (36.4)              |             | 44 (83)             | 7 (6.8)              |                 |
| II                                                                                                                                                                                                                                                                                                                                                                                                                          | 14 (9.0)         | 9 (13.2)              | 5 (5.7)                |             | 4 (7.5)             | 10 (9.7)             |                 |
| III                                                                                                                                                                                                                                                                                                                                                                                                                         | 20 (12.8)        | 7 (10.3)              | 13 (14.8)              |             | 4 (7.5)             | 16 (15.5)            |                 |
| IV                                                                                                                                                                                                                                                                                                                                                                                                                          | 23 (14.7)        | 16 (23.5)             | 7 (8)                  |             | 0 (0)               | 23 (22.3)            |                 |
| V                                                                                                                                                                                                                                                                                                                                                                                                                           | 48 (30.8)        | 17 (25)               | 31 (35.2)              |             | 1 (1.9)             | 47 (45.6)            |                 |
| <b>Clinical characteristics</b>                                                                                                                                                                                                                                                                                                                                                                                             |                  |                       |                        |             |                     |                      |                 |
| Duration of diabetes (years), mean (SD)                                                                                                                                                                                                                                                                                                                                                                                     | 5.65 (3.39)      | 5.52 (3.35)           | 5.75 (3.44)            | .671        | 4.06 (2.4)          | 6.47 (3.54)          | <b>&lt;.001</b> |
| HbA1c, mean (SD)                                                                                                                                                                                                                                                                                                                                                                                                            | 7.86 (1.36)      | 6.82 (0.36)           | 8.65 (1.31)            | NA          | 7.83 (1.17)         | 7.87 (1.45)          | .87             |
| HbA1c <7.5%, n (%)                                                                                                                                                                                                                                                                                                                                                                                                          | 68 (43.6)        | NA                    | NA                     |             | 21 (39.6)           | 47 (45.6)            | .474            |
| Presence of comorbidities, n (%)                                                                                                                                                                                                                                                                                                                                                                                            | 50 (32.1)        | 27 (39.7)             | 23 (26.1)              | .072        | 17 (32.1)           | 33 (32)              | .996            |
| <b>Comorbidities, n (%)</b>                                                                                                                                                                                                                                                                                                                                                                                                 |                  |                       |                        |             |                     |                      |                 |
| Asthma                                                                                                                                                                                                                                                                                                                                                                                                                      | 6 (3.8)          | 5 (7.4)               | 1 (1.1)                | .199        | 1 (1.9)             | 5 (4.9)              | .65             |
| Coeliac Disease                                                                                                                                                                                                                                                                                                                                                                                                             | 8 (5.1)          | 6 (8.8)               | 2 (2.3)                | .261        | 5 (9.4)             | 3 (2.9)              | .102            |
| Thyroiditis                                                                                                                                                                                                                                                                                                                                                                                                                 | 18 (11.5)        | 12 (17.6)             | 6 (6.8)                | .178        | 6 (11.3)            | 12 (11.7)            | .941            |
| ADHD                                                                                                                                                                                                                                                                                                                                                                                                                        | 4 (2.6)          | 1 (1.5)               | 3 (3.4)                | .322        | 1 (1.9)             | 3 (2.9)              | .999            |
| Others                                                                                                                                                                                                                                                                                                                                                                                                                      | 19 (12.2)        | 7 (10.3)              | 12 (13.6)              | .057        | 5 (9.4)             | 14 (13.6)            | .369            |
| ADHD = Attention-Deficit/Hyperactivity Disorder; BMI = Body mass index; HbA1c = Glycated haemoglobin; NA = Not Applicable; SD = Standard deviation.                                                                                                                                                                                                                                                                         |                  |                       |                        |             |                     |                      |                 |
| Other comorbidities: allergy, obesity, iron deficiency anaemia, unilateral anorchia, immunoglobulin A (IgA) deficiency, intellectual disability, epilepsy, hypercholesterolaemia, sensorineural hearing loss, migraines, idiopathic hypercalciuria, ovarian teratoma, nephrocalcinosis, psoriasis, allergic rhinitis, vasovagal syncope, Tourette's syndrome, eating disorder (ED) and obsessive-compulsive disorder (OCD). |                  |                       |                        |             |                     |                      |                 |

## Effectiveness

### Glycated haemoglobin

In the entire sample, there was a significant increase in HbA1c (0.32%,  $P<0.001$ ). The interaction between time and the baseline HbA1c group was statistically significant at 3, 6 and 12 months ( $P<0.001$ ) (**Table 2**). In the subgroup analysis, participants with baseline HbA1c $<7.5\%$  revealed an increase of 0.32% (0.18 to 0.47) in HbA1c at 12 months (with respect to baseline) ( $P<0.001$ ), without exceeding, on average, the threshold of poor control. Patients with poorly controlled baseline status had a statistically significant reduction in HbA1c at all follow-ups: B=-0.46% (-0.69 to -0.23;  $P<0.001$ ), B=-0.49% (-0.73 to -0.25;  $P<0.001$ ), and B=-0.43% (-0.68 to -0.19;  $P=0.001$ ), at 3, 6 and 12 months, respectively (**Table 2**). On average, this reduction did not attain the threshold of poor control.

| Glycosylated Haemoglobin                                                   |                         |                 |                         |                 |                           |                 |
|----------------------------------------------------------------------------|-------------------------|-----------------|-------------------------|-----------------|---------------------------|-----------------|
| Variable                                                                   | Total sample (n=156)    |                 | HbA1c <7.5% (n=68)      |                 | HbA1c $\geq 7.5\%$ (n=88) |                 |
|                                                                            | B (95%CI)               | P               | B (95%CI)               | P               | B (95%CI)                 | P               |
| <b>Time</b>                                                                |                         |                 |                         |                 |                           |                 |
| M3 (ref: M0)                                                               | 0.03<br>(-0.18; 0.24)   | .765            | 0.03<br>(-0.09; 0.16)   | .611            | -0.46<br>(-0.69; -0.23)   | <b>&lt;.001</b> |
| M6 (ref: M0)                                                               | 0.1<br>(-0.11; 0.32)    | .344            | 0.10<br>(-0.03; 0.23)   | .115            | -0.49<br>(-0.73; -0.25)   | <b>&lt;.001</b> |
| M12 (ref: M0)                                                              | 0.32<br>(0.10; 0.55)    | <b>.005</b>     | 0.32<br>(0.18; 0.47)    | <b>&lt;.001</b> | -0.43<br>(-0.68; -0.19)   | <b>.001</b>     |
| <b>Duration of T1DM</b>                                                    | 0.05<br>(0.007; 0.09)   | <b>.020</b>     | -0.005<br>(-0.04; 0.03) | .762            | 0.09<br>(0.02; 0.15)      | <b>.011</b>     |
| <b>Presence of comorbidities</b>                                           | -0.10<br>(-0.39; 0.18)  | .477            | 0.09<br>(-0.13; 0.30)   | .439            | -0.22<br>(-0.70; 0.26)    | .372            |
| <b>Age group: <math>\geq 12</math> years (ref: &lt;12 years)</b>           | 0.17<br>(-0.12; 0.47)   | .253            | 0.09<br>(-0.15; 0.32)   | .473            | 0.26<br>(-0.21; 0.73)     | .274            |
| <b>Baseline HbA1c group: <math>\geq 7.5\%</math> (ref: HbA1c &lt;7.5%)</b> | 1.81<br>(1.50; 2.13)    | <b>&lt;.001</b> |                         |                 |                           |                 |
| <b>Time*Baseline HbA1c Group (ref: M0 &amp; HbA1c &lt;7.5%)</b>            |                         |                 |                         |                 |                           |                 |
| M3 & HbA1c $\geq 7.5\%$                                                    | -0.49<br>(-0.78; -0.21) | <b>&lt;.001</b> |                         |                 |                           |                 |
| M6 & HbA1c $\geq 7.5\%$                                                    | -0.59<br>(-0.88; -0.29) | <b>&lt;.001</b> |                         |                 |                           |                 |
| M12 & HbA1c $\geq 7.5\%$                                                   | -0.76<br>(-1.05; -0.46) | <b>&lt;.001</b> |                         |                 |                           |                 |
| <b>Intercept</b>                                                           | 6.75<br>(6.41; 7.09)    | <b>&lt;.001</b> | 6.73<br>(6.50; 6.96)    | <b>&lt;.001</b> | 8.53<br>(8.12; 8.94)      | <b>&lt;.001</b> |

CI = Confidence Interval; HbA1c = Glycosylated Haemoglobin; M = Month; T1DM = Type 1 Diabetes Mellitus.

### Severe hypoglycaemic (SH) events

The reduction in the number of self-reported events was significant at 12 months  $\beta=-0.37$  (-0.62 to -0.11;  $P=0.004$ ) (**Table 1 in online supplemental Appendix 5**). Although the interaction with the level of HbA1c at baseline was not statistically significant ( $P=0.117$ ), the descriptive statistics (**online supplemental Appendix 4**) in patients with controlled HbA1c at baseline show a reduction in the mean number of events; with an increase in the poorly controlled subgroup.

SH events recorded in the EHR show significantly lower rates compared to self-reported events (**online supplemental Appendix 4**), without significant main or interaction effects (**Table 1 in online supplemental**

**Appendix 5).** The rate of SH events was significantly higher in the subgroup with poor HbA1c control ( $P=0.014$ ) (Table 1 in online supplemental Appendix 5).

#### Diabetic ketoacidosis and other serious adverse events

In the follow-up phase, six mild or moderate ketoacidosis events were recorded at three (2), six (1), and 12 months (3), respectively; and four serious adverse events at three months (two admissions and one episode of ketosis without acidosis due to bubbles in the system); and at six months (one admission). No events were observed at 12-month follow-up. No patient died during follow-up.

#### Health-related quality of life

At 12 months follow-up, the percentages of severe limitations for mobility, self-care, daily activities, anxiety and depression were similar to baseline values. However, a reduction was observed in the percentage of patients who self-reported pain (online supplemental Appendix 4).

VAS score (Table 1 in online supplemental Appendix 5) did not show a significant change in the whole sample, and the interaction with baseline HbA1c values was slightly above the statistical significance level ( $P=0.061$ ). In poorly controlled patients, VAS scores were significantly reduced at 12 months compared to the baseline score  $B=-6.03$  (-9.66 to -2.41;  $P=0.001$ ). In the subgroup with good basal metabolic control, no statistically significant findings were observed.

#### Knowledge of diabetes treatment

There was no significant change in patients' Knowledge of diabetes treatment, nor a significant interaction with baseline HbA1c. Patients with worse basal metabolic control revealed a significantly lower score compared to well-controlled patients:  $B=-1.27$  (-1.89 to -0.65;  $P<0.001$ ) (Table 1 in online supplemental Appendix 5).

#### Satisfaction with treatment

General satisfaction with treatment significantly increased 3.1 points at 12 months of follow-up (0.99 to 5.23;  $P=0.004$ ) (Table 1 in online supplemental Appendix 5). There were no statistically significant differences in self-perceived hypo- and hyperglycaemia. For the latter, a higher score of 1.06 points (in a range of 0 to 6) was observed, in patients with  $HbA1c \geq 7.5\%$ , compared to those with good control (0.60 to 1.52;  $P<0.001$ ) (Table 1 in online supplemental Appendix 5).

#### Safety

Mild adverse events related to the device during follow-up phases had a 3.1% and 6.6% reduction for skin reactions and discomfort or pain, respectively. However, these were not statistically significant (Table 3).

| Table 3. Mild Adverse Effects caused by the sensor |                     |                     |                      |          |                                       |
|----------------------------------------------------|---------------------|---------------------|----------------------|----------|---------------------------------------|
|                                                    | 3 months<br>(n=150) | 6 months<br>(n=136) | 12 months<br>(n=128) | <i>P</i> | Differences 12–3 months,<br>% (95%CI) |
| Skin reactions, n (%)                              | 21 (14.0)           | 16 (11.8)           | 14 (1.9)             | .542     | -3.1% (-25.2; 19.0)                   |
| Discomfort or pain, n (%)                          | 17 (11.3)           | 13 (9.6)            | 6 (4.7)              | .210     | -6.6% (-29.3; 16.1)                   |
| Other minor events, n (%)                          | 3 (2.0)             | 2 (1.5)             | 2 (1.6)              | .999     | -0.4% (-23.9; 23.1)                   |

Among the other events, there were minor haemorrhages when the sensor was positioned and wounds in the insertion area. In one case, the patient lost consciousness because of the bleeding.  
CI = Confidence Interval.

#### Adherence

Time of sensor use (Table 2 in online supplemental Appendix 5) significantly increased at 6.4% at 12 months of follow-up (1.12 to 11.72;  $P=0.02$ ), compared to three months. Longer duration of T1DM ( $P=0.008$ ), and age older than 12 years ( $P=0.003$ ), significantly reduced sensor use.

1  
2  
3  
4 A reduction in the mean number of daily scans at three months occurred in poorly controlled patients  $B=-1.92$  (-  
5 3.52 to -0.31;  $P=0.019$ ). Those aged over 12 underwent an average of four fewer scans than those aged under 12  
6 years  $B=-3.92$  (-5.4 to -2.43;  $P<0.001$ ) (**Table 2 in online supplemental Appendix 5**).

7  
8 Controlled patients revealed an increase in the mean number of sensors use at 12 months of follow-up  $B=7$  (5.85  
9 to 8.06;  $P<0.001$ ); also increasing in poorly controlled patients by  $B=1.6$  (0.48 to 2.7;  $P=0.005$ ) at 6 months, and  
10  $B=9.4$  (8.25 to 10.5;  $P<0.001$ ) at 12 months (**Table 2 in online supplemental Appendix 5**).

11 The percentage of time of use was statistically significantly related to a lower HbA1c level at 12 months ( $B=-0.01$ ;  
12  $P=0.013$ ), as was the number of scans ( $B=-0.21$ ;  $P<0.001$ ).

### 13 14 15 16 **Cost estimation**

17 The estimated total annual costs per patient are shown in **Table A2 (online supplemental Appendix 3)**.  
18 Intervention short-term costs from an NHS perspective reveal that specialist visits and test strips and lancets  
19 costs account for a significant part of total costs (38% and 41%, respectively), with an average annual cost per  
20 patient of €415.48 and €447.25 for specialist visits and strips and lancets, respectively. Regarding the cost of the  
21 FSL sensor, it amounts to €43.27 according to information provided by the manufacturer. Taking into account an  
22 average number of sensors per patient per year of 26 (considering a sensor half-life of 14 days), the total annual  
23 cost of the sensor amounts to €1,125 per patient/year. This means that the average total annual costs per patient  
24 with the use of FSL amounts to €2204.26 (**Table A2 (online supplemental Appendix 3)**).

25  
26 Total annual costs before and after use of the FSL system can be found in **Figure A1 (online supplemental**  
27 **Appendix 3)**. All measured costs decreased after use of the device throughout 12 months follow-up, with the  
28 most striking difference in costs related to test strips and lancets use, an annual difference of €856.68 per patient.  
29 This information is outlined in **Table A3 (online supplemental Appendix 3)**. The annual average number of test  
30 strips per patient decreased from 2686.02 strips per year before the use of the FSL, to 883.98 strips per year  
31 after its use. The difference in the annual average use of lancets per patient also reduced from 1366.41, before  
32 FSL use, to 615.94, after its use.

33  
34 Furthermore, a decrease in total annual costs due to productivity losses of parents/caregivers of minor patients  
35 with T1DM was observed after the use of FSL (€545.67 versus €262.73) as shown in **Table A3 (online**  
36 **supplemental Appendix 3)**.

## Discussion

Glucose monitoring devices can help people with T1DM monitor their glycaemia levels and reduce the frequency and/or severity of acute disease-complication rates, thus improving their HRQoL and life expectancy [34]. Two meta-analyses of case series on the effectiveness of the FSL revealed statistically significant HbA1c reductions in children/adolescents with poor HbA1c control (7.5%-9.6%, except two studies with 7.1% and 7.4%) of -0.54% (n=447) [35] and -0.29% (n=959) [11], although the effect was highly variable across studies. Our study only provides a statistically significant reduction of HbA1c in the group with poor baseline monitoring, (-0.46%, -0.49% and -0.35%), at 3, 6 and 12 months, respectively. On the contrary, patients with basal controlled HbA1c levels revealed a significant 12-month worsening higher than 0.30%. Another case series in Spain (n=145) [36], with limited follow up to three months, also detected a reduction in patients with HbA1c $\geq$ 7.5% (-0.41,  $P=0.004$ ), and a statistically significant increase in well-monitored patients, i.e. a worsening in HbA1c levels (0.23,  $P=0.03$ ). The uncontrolled design of the study precludes ruling out that this result just reflects a regression to the mean. A recent meta-analysis of randomized controlled trials on the effectiveness of continuous glucose monitoring in people with T1DM showed a significant effect only in studies with mean HbA1c values at baseline  $>8\%$  (-0.49%) [37]. However, apart from not being based exclusively on non-adult population, this result is based on meta-analysis and not on the analysis of interactions in the individual studies, and therefore it is subjected to potential risk of ecological fallacy.

The results also revealed a significant reduction in the number of self-reported SH events for the whole sample (-0.37), but not in the number of patients with at least one event. The interaction effect with baseline HbA1c level was not statistically significant for these two variables ( $P=0.117$  and  $P=0.108$ , respectively). The descriptive statistics suggest different subgroup effects, although none was statistically significant. The reduction of self-reported SH events occurred in patients with controlled HbA1c levels at baseline (0.39), whereas in the basally uncontrolled group, an increase was self-reported (0.37 more); together with an important increase in the rate of patients with at least one event (from 26% to 38%). Again, an effect of regression to the mean could be the explanation for this result since, as expected, patients with controlled HbA1c at baseline showed higher SH rates and means. Alternatively, the results on both HbA1c and SH could be reflecting the trade-off faced by patients with T1DM between the reduction in glucose levels and the associated risk of increasing hypoglycaemic events. This interpretation is speculative given the commented methodological limitations of the study, but it would help account for the unexpected significant worsening in self-perceived general health observed in the subgroup of poor baseline HbA1c monitoring. That is, contrary to the HbA1c improvement attained, that has no observable effects on self-perceived HRQoL, suffering an SH event is a salient experience that may impact this self-perception.

Other studies [36] have also reported a significant and clinically meaningful improvement in the rate of SH events (from 4.2 to 0.2 events/100 patients-year). However, their results are not reported separately according to basal levels of metabolic control. The largest case series published to date with children and adolescents [38], and with the longest follow-up (12 months), also revealed a statistically significant reduction of SH events (53%,  $P=0.012$ ) for the whole sample, with no changes in HbA1c.

The interaction of the intervention with the age group ( $<12$  vs.  $\geq 12$  years-old) was not statistically significant in any case. However, descriptive statistics reveal different non-significant trends among subgroups, with positive results only for younger participants: -0.26% vs. -0.05% (HbA1c), -1.06 vs. 0.68 (SH events) and -4.2% vs. 10.5% (people with one or more SH). Adolescents revealed significantly lower sensor usage time and scans per day than children, similar to the results observed in previous studies [39-41]. Adolescents and young adults face specific challenges and barriers regarding the use of glucose monitoring sensors, such as concerns about self-image and how people perceive them [42,43], differential emotional reactions to diabetes burden [44] or a lesser interest in glucose data analysis [45], and therefore specific strategies might be necessary to increase sensor use in this population [46]. Nonetheless, adolescents in our sample showed adequate adherence throughout the study, above 78% of the time at each successive evaluation. Regarding the effectiveness of the FLS in adolescents,

1  
2  
3  
4 the only randomized controlled trial to date included participants aged 13-20 years, with HbA1c $\geq$ 9.0%) [13], and  
5 although it found significantly higher satisfaction in the intervention group at 6 months, it did not reveal any  
6 statistically significant differences in HbA1c reduction compared to traditional self-monitoring. Therefore,  
7 significant uncertainty remains in regard to the effects of FSL in adolescents.  
8

9 Despite the improvement in the degree of metabolic control that occurred in our study sample of patients  
10 with worse baseline HbA1c levels, no statistically significant improvement was observed in their knowledge of  
11 diabetes treatment. Device adherence was significantly related to the reduction of HbA1c, a result usually  
12 observed in the literature on glucose monitoring devices [39-41]. The same can be said about treatment  
13 satisfaction [47,48], which improved in the whole sample.  
14

15 In regard to safety, no serious adverse effects were observed, a result consistent with the literature on  
16 glucose monitoring devices in general [9]. The number of patients showing mild adverse events at three months  
17 was reduced at the end of follow-up to 18%, resulting in two losses at six months follow-up due to skin reaction  
18 to the sensor and another two at 12 months due to discomfort with the sensor.  
19

20 In terms of costs analysis as observed in the international literature, our results showed that T1DM patients  
21 consume less healthcare resources using FSL [49]. Fundamentally, a striking decrease was observed in costs  
22 attributed to reactive strips and lancets, where an annual difference of €856.68 per patient was obtained (not  
23 including cost of sensor). A decrease in total indirect annual costs due to productivity losses of parents/carers of  
24 T1DM patients, was also observed (€545.67 versus €262.73). Despite the savings observed in all cost categories,  
25 when the cost of the device is taken into account, there is no potential savings with the use of the FSL. However,  
26 this information can be useful for decision-making and negotiating the price of the device.  
27

28 The main limitation of this study lies in its uncontrolled design, which precludes comparison with an  
29 untreated group. Therefore, an inference of causality regarding the introduction of the FLS is not possible,  
30 because other factors such as child developmental growth, potential changes in target treatment or insulin  
31 administration methods or a regression to the mean could affect the observed changes. A “novelty effect”,  
32 related to the use of a technological device could also introduce a motivation bias that could affect self-  
33 management habits. Another relevant limitation is the limited sample size to analyse interaction effects, even  
34 when we increased the recruited sample fourfold. By the time of study execution, the FSL was already financed  
35 and introduced in some hospitals taking part and a large portion of the target population was already using it.  
36 This scenario was an important recruitment obstacle to enlarge sample size. Our conclusions to be drawn are,  
37 therefore, limited by the low statistical power for interaction analyses and rare events such as severe  
38 hypoglycaemia. All these limitations imply a low quality of the evidence.  
39

40 The start-up of a monitoring study has been used to collect data on the use of resources and make initial  
41 estimates of the cost of the intervention. Therefore, our cost analysis was a secondary endpoint and  
42 complementary to this study’s primary endpoint and it has limitations. First, our analysis has not taken into  
43 account the costs attributable to the possible adverse effects arising from the use of FSL and it has assumed that  
44 possible failures of the device will be resolved at no additional cost to the Spanish NHS. Moreover, it was not  
45 possible to estimate the costs related to hospitalization of the patients since the number of days of each  
46 hospitalization was not recorded in this study. However, the extremely low number of total hospitalizations  
47 during the monitoring study indicates that including this cost in the estimate would not have produced  
48 substantial changes in the results.  
49

50 To the best of our knowledge, this is the first comparative costs analysis study of FSL use in children and  
51 adolescents with T1DM in Spain using observational data in an actual use scenario. Therefore, although a cost-  
52 effectiveness analysis could not be performed in this study, due to the absence of a comparator, our results may  
53 contribute to inform future cost-effectiveness studies of FSL in Spain.  
54  
55  
56  
57  
58  
59  
60



## Conclusion

Our results showed that the use of FSL in young T1DM patients significantly reduced the rate of SH events, and improved HbA1c levels in patients with poor baseline monitoring. However, future studies should confirm whether these benefits could be at the cost of worsening severe hypoglycaemia in patients with lower HbA1c. No serious adverse events related to FSL were observed. The results also suggest that the use of FSL in young patients with T1DM leads to a decrease in monitoring costs. In addition, the use of FSL reduces costs attributable to lost productivity of parents/caregivers. These outcomes correspond to low-quality evidence, mainly due to the study's uncontrolled design, in addition to the low statistical power in the case of rare complications such as SH.

Based on these results and other information sources (i.e., international research and clinical expert advice), the Spanish Ministry of Health has decided to reimburse the FreeStyle Libre (FSL) for children and adolescents aged 4-17 years old with Type 1 diabetes who undergo intensive insulin therapy (multiple daily injections or insulin pump) and require at least six fingerstick blood glucose self-monitoring tests a day.

## Footnotes

**Collaborators:** The Health Professional Group included the following members (in alphabetical order): Amparo González Vergaz (Hospital Severo Ochoa), Ana María Prado Carro (Complejo Hospitalario Universitario A Coruña), Anunciación Beisti Ortego (Fundación Hospital Calahorra), Ariadna Campos Martorell (Hospital Universitari Vall D'hebron), Atilano José Carcavilla Urqui (Hospital Universitario La Paz), Cristina Amparo Del Castillo Villaescusa (Hospital Universitario Dr. Peset Aleixandre), Estela Gil Poch (Hospital Universitario de Badajoz), Francisco Javier Arroyo Diez (Hospital Universitario de Badajoz), Gemma Novoa Gómez (Complejo Hospitalario Universitario de Ourense), Isabel González Casado (Hospital Universitario La Paz), Juncal Martínez Ibáñez (Fundación Hospital Calahorra), Laura Cuadrado Piqueras (Fundación Hospital Calahorra), Leticia Reis Iglesias (Complejo Hospitalario Universitario de Ourense), Lucia Garzón Lorenzo (Hospital Universitario 12 De Octubre), Luis Salamanca Fresno (Hospital Universitario La Paz), María Asunción Martínez Brocca (Hospital Universitario Virgen Macarena), María Aurea Rodríguez Blanco (Hospital Da Barbanza), María Del Mar Martínez López (Hospital Universitario 12 De Octubre), María Jesús Ferreiro Rodríguez (Complejo Hospitalario Universitario de Ourense), María Ruiz del Campo (Hospital San Pedro), Nerea Itza Martín (Hospital Universitario La Paz), Patricia García Navas (Hospital San Pedro), Rebeca García García (Hospital Universitario Central de Asturias).

**Contributors:** YAP, ARS, LPP and PSA initiated the study. HGP did the acquisition of data. HGP, ARS, CVN and YRF contributed to the analysis and interpretation of data. HGP did the statistical analyses. HGP, ARS, CVN YAP and YRF wrote the first draft of the manuscript. HGP, ARS, YRF, CVN, YAP, LGP, MAGB, LPP AND PSA critically revised the manuscript and approved the final version. HGP is responsible for the overall content as the guarantor and accepts full responsibility for the work and/or the conduct of the study, had access to the data, and controlled the decision to publish.

**Competing interests:** None declared.

**Funding:** This work was financed by the Spanish Ministry of Health, Consumer Affairs and Social Welfare in the framework of activities developed by the Spanish Network of Agencies for Health Technology Assessment for the Spanish National Health Service.

**Data availability statement:** Data are not publicly available. Data are available upon reasonable request via the corresponding author.

**Ethics approval statement**

**Patient consent for publication:** Not applicable.

**Ethics approval:** All participants provided written informed consent. The scientific and ethics committees approved the study protocol (Hospital Universitari Vall d'Hebron, ID-RTF065).

## References

1. Lucier J, Weinstock RS, Doerr C. Diabetes Mellitus Type 1 (Nursing). In: *StatPearls*. Treasure Island (FL): StatPearls Publishing; March 3, 2023-. PMID: 33760510
2. Golden SH, Sapir T. Methods for insulin delivery and glucose monitoring in diabetes: summary of a comparative effectiveness review. *J. Manag. care Pharm.* 2012;18(6):S1 17. doi:10.18553/jmcp.2012.18.s6-a.1
3. Miranda Velasco MJ, Domínguez Martín E, Arroyo Díez FJ, Méndez Pérez P, González de Buitrago Amigo J. Calidad de vida relacionada con la salud en la diabetes mellitus tipo 1. *An. Pediatría.* 2012 Nov;77(5):329–33. doi: 10.1016/j.anpedi.2012.03.005
4. International Diabetes Federation. IDF diabetes atlas. 8.aed.Bruselas, Bélgica; 2017.2
5. Conde Barreiro S, Rodríguez Rigual M, Bueno Lozano G, et al. Epidemiología de la diabetes mellitus tipo 1 en menores de 15 años en España. *An. Pediatría.* 2014;81(3):189.e1 189.e12. doi: 10.1016/j.anpedi.2013.12.010
6. Crespo C, Brosa M, Soria-Juan A, Lopez-Alba A, López-Martínez N, Soria B. Costes directos de la diabetes mellitus y de sus complicaciones en España (Estudio SECCAID: Spain estimated cost Ciberdem-Cabimer in Diabetes). *Av. en Diabetol.* 2013;29(6):182–189
7. Klonoff DC, Ahn D, Drincic A. Continuous glucose monitoring: A review of the technology and clinical use. *Diabetes Res. Clin. Pract.* 2017;133:178-192. doi: 10.1016/j.diabres.2017.08.005
8. Marsters BL, Boucher SE, Galland BC, et al. Cutaneous adverse events in a randomized controlled trial of flash glucose monitoring among youth with type 1 diabetes mellitus. *Pediatr Diabetes.* 2020;21(8):1516-1524
9. Landau Z, Abiri S, Gruber N, et al. Use of flash glucose-sensing technology (FreeStyle Libre) in youth with type 1 diabetes: AWeSoMe study group real-life observational experience [published correction appears in *Acta Diabetol.* 2018 Sep 12;:]. *Acta Diabetol.* 2018;55(12):1303-1310. doi:10.1007/s00592-018-1218-8
10. Gao Y, Zhou M, Xu X, Chen WY. Effects of flash glucose monitoring on glycemic control in participants with diabetes mellitus: A meta-analysis of randomized controlled trials. *J Diabetes Complications.* 2022;36(11):108314. doi:10.1016/j.jdiacomp.2022.108314
11. Gordon I, Rutherford C, Makarounas-Kirchmann K, Kirchmann M. Meta-analysis of average change in laboratory-measured HbA1c among people with type 1 diabetes mellitus using the 14 day Flash Glucose Monitoring System. *Diabetes Res Clin Pract.* 2020;164:108158. doi:10.1016/j.diabres.2020.108158
12. Castellana M, Parisi C, Di Molfetta S, et al. Efficacy and safety of flash glucose monitoring in patients with type 1 and type 2 diabetes: a systematic review and meta-analysis. *BMJ Open Diabetes Res Care.* 2020;8(1):e001092. doi:10.1136/bmjdr-2019-001092
13. Boucher SE, Gray AR, Wiltshire EJ, et al. Effect of 6 Months of Flash Glucose Monitoring in Youth With Type 1 Diabetes and High-Risk Glycemic Control: A Randomized Controlled Trial. *Diabetes Care.* 2020;43(10):2388-2395. doi:10.2337/dc20-0613
14. Serrano-Aguilar P, Asua-Batarrita J, Molina-López MT, et al. The Spanish Network of Agencies for Health Technology Assessment and Services of the National Health System (RedETS). *Int J Technol Assess Health Care.* 2019 Jan;35(3):176-180. doi: 10.1017/S0266462319000205. Epub 2019 Apr 22. PMID: 31006412.
15. Perestelo-Pérez L, Rivero-Santana A, García-Lorenzo B, Castilla-Rodríguez I, Vallejo-Torres L, García-Pérez L, et al. Efectividad, seguridad y coste-efectividad del sistema flash de monitorización de glucosa en líquido intersticial (FreeStyle Libre®) para la Diabetes Mellitus tipo 1 y 2. Ministerio de Sanidad, Servicios Sociales e

1  
2  
3  
4 Igualdad. Servicio de Evaluación del Servicio Canario de la Salud; 2016. Informes de Evaluación de Tecnologías  
5 Sanitarias.  
6

7  
8 16. Perestelo-Pérez L, Rivero-Santana A, García-Lorenzo B, Castilla-Rodríguez I, Vallejo-Torres L, García-Pérez L,  
9 et al. Efectividad, seguridad y coste-efectividad del sistema flash de monitorización de glucosa en líquido  
10 intersticial (FreeStyle Libre®) para la Diabetes Mellitus tipo 1 y 2 (Apéndice de actualización). Ministerio de  
11 Sanidad, Servicios Sociales e Igualdad. Servicio de Evaluación del Servicio Canario de la Salud; 2017. Informes de  
12 Evaluación de Tecnologías Sanitarias.

13  
14 17. Servicio de Evaluación del Servicio Canario de la Salud. (s.f.). <http://www.sescs.es/>

15  
16 18. Resolución de 26 de abril de 2019, de la Dirección General de Cartera Básica de Servicios del Sistema Nacional  
17 de Salud y Farmacia, por la que se hace público el acuerdo de la Comisión de prestaciones, aseguramiento y  
18 financiación de 5 de noviembre de 2018 y 28 de marzo de 2019, sobre el sistema de monitorización de glucosa  
19 mediante sensores (tipo flash) en adultos en la cartera común de servicios del Sistema Nacional de Salud.  
20 [https://www.sanidad.gob.es/profesionales/prestacionesSanitarias/CarteraDeServicios/ContenidoCS/docs/Reso  
21 lucionglucosadultos.pdf](https://www.sanidad.gob.es/profesionales/prestacionesSanitarias/CarteraDeServicios/ContenidoCS/docs/Resolucionglucosadultos.pdf)

22  
23 19. Resolución de 30 de noviembre de 2020, de la Dirección General de Cartera Común de Servicios del Sistema  
24 Nacional de Salud y Farmacia, por la que se hace público el acuerdo de la Comisión de prestaciones,  
25 aseguramiento y financiación de 14 de julio de 2020 sobre el sistema de monitorización de glucosa mediante  
26 sensores (tipo flash) en la cartera común de servicios del Sistema Nacional de Salud.  
27 [https://www.sanidad.gob.es/profesionales/prestacionesSanitarias/CarteraDeServicios/ContenidoCS/docs/Reso  
28 l Flash 2020.pdf](https://www.sanidad.gob.es/profesionales/prestacionesSanitarias/CarteraDeServicios/ContenidoCS/docs/Reso)

29  
30 20. Serrano-Aguilar P, Gutierrez-Ibarluzea I, Díaz P, Imaz-Iglesia I, González-Enríquez J, Castro JL, Espallargues M,  
31 et al. Postlaunch evidence-generation studies for medical devices in Spain: the RedETS approach to integrate  
32 real-world evidence into decision making. *Int J Technol Assess Health Care*. 2021 May 4;37(1):e63. doi:  
33 10.1017/S0266462321000295

34  
35 21. Resolución de 28 de agosto de 2018, de la Dirección General de Cartera Básica de Servicios del Sistema  
36 Nacional de Salud y Farmacia, por la que se determina el sometimiento del sistema de monitorización de glucosa  
37 mediante sensores (tipo flash) a estudio de monitorización y se establecen sus requisitos específicos.  
38 <https://www.boe.es/boe/dias/2018/09/18/pdfs/BOE-A-2018-12686.pdf>

39  
40 22. Abbott Diabetes Care. Manual de Usuario. FreeStyle Libre. Sistema Flash de Monitorización de Glucosa.  
41 Madrid: 2017

42  
43 23. Wille N, Badia X, Bonsel G, et al. Development of the EQ-5D-Y: A child-friendly version of the EQ-5D. *Quality  
44 of Life Research*. 2010;19(6):875–886. 14. doi: 10.1007/s11136-010-9648-y

45  
46 24. Mitchell K, Johnson K, Cullen K, et al. Parental mastery of continuous subcutaneous insulin infusion skills and  
47 glycemic control in youth with type1 diabetes. *Diabetes Technol Ther*. 2013;15(7):591-595. doi:  
48 10.1089/dia.2013.0031

49  
50 25. Bradley C. The Diabetes Treatment Satisfaction Questionnaire: DTSQ. In: Bradley C, editor. Handbook of  
51 Psychology and Diabetes: a guide to psychological measurement in diabetes research and practice. Chur,  
52 Switzerland: Harwood Academic Publishers. 1994. pp. 111–132

53  
54 26. Tanner, J M. Growth at Adolescence: With a General Consideration of the Effects of Hereditary and  
55 Environmental Factors Upon Growth and Maturation from Birth to Maturity. Oxford: Blackwell Scientific  
56 Publications, 1962. Print.

- 1  
2  
3  
4 27. Hayes AJ, Leal J, Gray AM, et al. UKPDS outcomes model 2: a new version of a model to simulate lifetime  
5 health outcomes of patients with type 2 diabetes mellitus using data from the 30 year United Kingdom  
6 Prospective Diabetes Study: UKPDS 82. *Diabetologia*. 2013;56(9):1925-1933. doi: 10.1007/s00125-013-2940-y  
7
- 8 28. StataCorp. Stata statistical software: release 15. College Station, TX: StataCorp LLC, 2017.  
9
- 10 29. IBM Corp. Released 2011. IBM SPSS Statistics for Windows, Version 20.0. Armonk, NY: IBM Corp.  
11
- 12 30. Instituto Nacional de Estadística (INE). Actualización de rentas con el IPC general (sistema IPC base 2016) para  
13 periodos anuales completos. Disponible en: <https://www.ine.es/calcula/>  
14
- 15 31. Zhu W. Making bootstrap statistical inferences: a tutorial. *Res Q Exerc Sport*. 1997; 68:44-55. doi:  
16 10.1080/02701367.1997.10608865  
17
- 18 32. Eurostat. Labour cost levels by NACE Rev. 2 activity. Disponible en:  
19 [https://ec.europa.eu/eurostat/databrowser/view/lc\\_lci\\_lev/default/table?lang=en](https://ec.europa.eu/eurostat/databrowser/view/lc_lci_lev/default/table?lang=en)  
20
- 21 33. Instituto Nacional de Estadística (INE). Encuesta de Población Activa (EPA). Disponible en:  
22 [https://www.ine.es/dyngs/INEbase/es/operacion.htm?c=Estadistica\\_C&cid=1254736176918&menu=ultiDatos](https://www.ine.es/dyngs/INEbase/es/operacion.htm?c=Estadistica_C&cid=1254736176918&menu=ultiDatos)  
23 &idp=1254735976595  
24
- 25 34. Ang E, Lee ZX, Moore S, Nana M. Flash glucose monitoring (FGM): A clinical review on glycaemic outcomes  
26 and impact on quality of life. *J Diabetes Complications*. 2020 Jun;34(6):107559. doi:  
27 10.1016/j.jdiacomp.2020.107559  
28
- 29 35. Evans M, Welsh Z, Ells S, et al. The Impact of Flash Glucose Monitoring on Glycaemic Control as Measured by  
30 HbA1c: A Meta-analysis of Clinical Trials and Real-World Observational Studies. *Diabetes Ther*. 2020;11(1):83-95.  
31 doi: 10.1007/s13300-019-00720-0  
32
- 33 36. Leiva-Gea I, Garcia Vázquez J, Liñán Jurado FR, et al. Introduction of Flash Glucose Monitoring in Children  
34 with Type 1 Diabetes: Experience of a Single-Centre in Spain. *ESPE Abstracts (2019) 92 LB-20*.  
35
- 36 37. Teo E, Hassan N, Tam W, Koh S. Effectiveness of continuous glucose monitoring in maintaining glycaemic  
37 control among people with type 1 diabetes mellitus: a systematic review of randomised controlled trials and  
38 meta-analysis. *Diabetologia*. 2022;65(4):604-619. doi:10.1007/s00125-021-05648-4  
39
- 40 38. Messaaoui A, Tenoutasse S, Crenier L. Flash Glucose Monitoring Accepted in Daily Life of Children and  
41 Adolescents with Type 1 Diabetes and Reduction of Severe Hypoglycemia in Real-Life Use. *Diabetes Technol Ther*.  
42 2019 Jun;21(6):329-335. doi: 10.1089/dia.2018.0339  
43
- 44 39. Urakami T, Yoshida K, Kuwabara R, et al. Frequent scanning using flash glucose monitoring contributes to  
45 better glycemic control in children and adolescents with type 1 diabetes. *J Diabetes Investig*. 2022;13(1):185-  
46 190. doi: 10.1111/jdi.13618  
47
- 48 40. Lameijer A, Lommerde N, Dunn TC, et al. Flash Glucose Monitoring in the Netherlands: Increased monitoring  
49 frequency is associated with improvement of glycemic parameters. *Diabetes Res Clin Pract*. 2021;177:108897.  
50 doi: 10.1016/j.diabres.2021.108897  
51
- 52 41. Battelino T, Liabat S, Veeze HJ, et al. Routine use of continuous glucose monitoring in 10 501 people with  
53 diabetes mellitus. *Diabet Med*. 2015;32(12):1568-74. doi:10.1111/dme.12825  
54
- 55 42. Messer LH, Tanenbaum ML, Cook PF, et al. Cost, Hassle, and On-Body Experience: Barriers to Diabetes  
56 Device Use in Adolescents and Potential Intervention Targets. *Diabetes Technol Ther*. 2020;22(10):760-767.  
57 doi:10.1089/dia.2019.0509  
58  
59  
60

- 1  
2  
3  
4 43. Borus JS, Laffel L. Adherence challenges in the management of type 1 diabetes in adolescents: prevention  
5 and intervention. *Curr Opin Pediatr*. 2010;22(4):405-411. doi:10.1097/MOP.0b013e32833a46a7  
6  
7 44. Patton SR, Clements MA. Psychological Reactions Associated With Continuous Glucose Monitoring in Youth. *J*  
8 *Diabetes Sci Technol*. 2016;10(3):656-661. Published 2016 May 3. doi:10.1177/1932296816638109  
9  
10 45. Huhn F, Lange K, Jördening M, et al. Real-World Use of Continuous Glucose Monitoring Systems Among  
11 Adolescents and Young Adults With Type 1 Diabetes: Reduced Burden, but Little Interest in Data Analysis. *J*  
12 *Diabetes Sci Technol*. 2023;17(4):943-950. doi:10.1177/19322968221081216  
13  
14 46. Prahalad P, Ebekozi O, Alonso GT, et al. Multi-Clinic Quality Improvement Initiative Increases Continuous  
15 Glucose Monitoring Use Among Adolescents and Young Adults With Type 1 Diabetes. *Clin Diabetes*.  
16 2021;39(3):264-271. doi:10.2337/cd21-0026  
17  
18 47. Ang E, Lee ZX, Moore S, et al. Flash glucose monitoring (FGM): A clinical review on glycaemic outcomes and  
19 impact on quality of life. *J Diabetes Complications*. 2020;34(6):107559. doi: 10.1016/j.jdiacomp.2020.107559  
20  
21 48. Palylyk-Colwell E, Ford C. Flash Glucose Monitoring System for Diabetes. 2017 Jun 1. In: *CADTH Issues in*  
22 *Emerging Health Technologies*. Ottawa (ON): Canadian Agency for Drugs and Technologies in Health; 2016-. 158.  
23 PMID: 29369576.  
24  
25 49. Lin R, Brown F, James S, Jones J, Ekinci E. Continuous glucose monitoring: A review of the evidence in type 1  
26 and 2 diabetes mellitus. *Diabet Med*. 2021 May;38(5):e14528. doi: 10.1111/dme.14528. Epub 2021 Mar 6. PMID:  
27 33496979.  
28  
29  
30  
31  
32  
33  
34  
35  
36  
37  
38  
39  
40  
41  
42  
43  
44  
45  
46  
47  
48  
49  
50  
51  
52  
53  
54  
55  
56  
57  
58  
59  
60

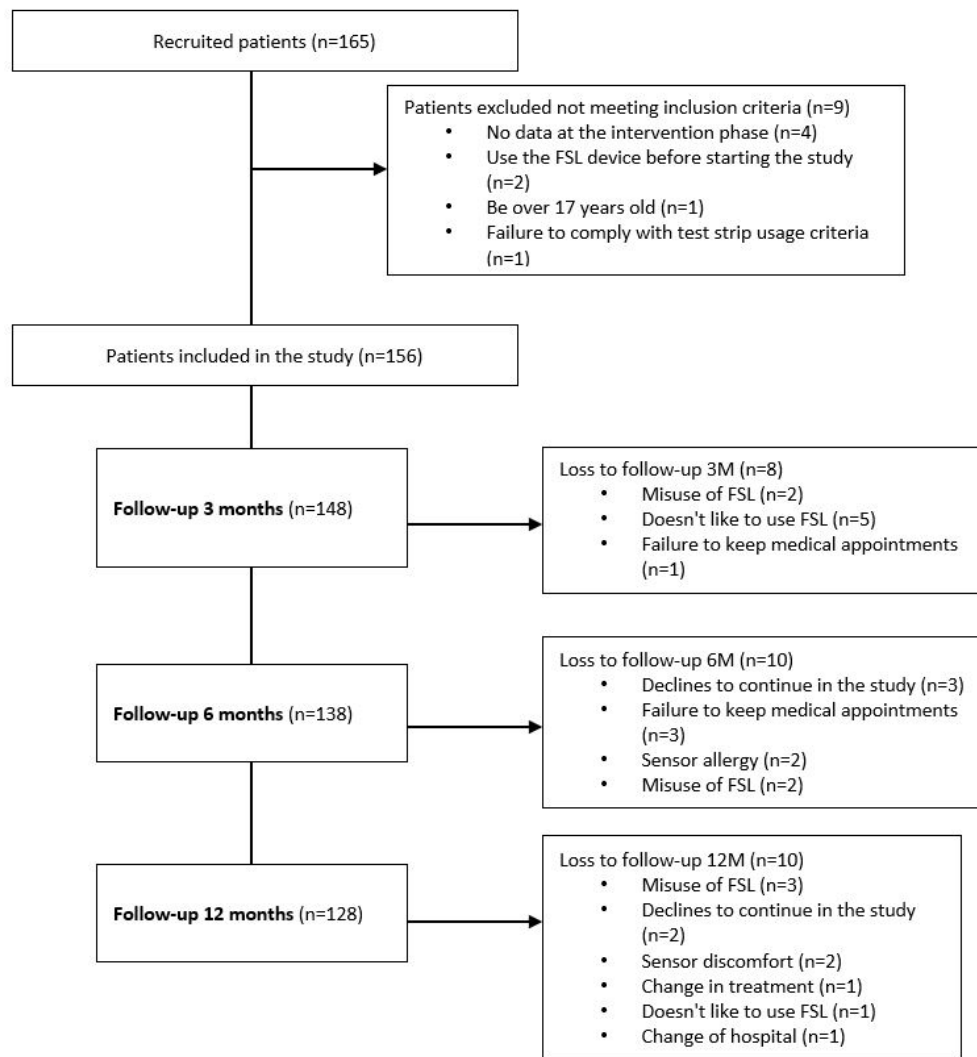

Figure1. Flow-charts

201x216mm (96 x 96 DPI)

**Appendix 1. Participating hospitals and cases included in the study**

| <b>Public hospitals</b>                        | <b>Regional Health Services</b> | <b>Number of patients</b> |
|------------------------------------------------|---------------------------------|---------------------------|
| Hospital Universitario Virgen Macarena*        | Andalucía                       | 2                         |
| Hospital Universitario Central de Asturias*    | Asturias                        | 4                         |
| Hospital Universitario Vall D'hebron*          | Cataluña                        | 22                        |
| Hospital Universitario de Badajoz              | Extremadura                     | 30                        |
| Complejo Hospitalario Universitario A Coruña*  | Galicia                         | 23                        |
| Complejo Hospitalario Universitario de Ourense | Galicia                         | 14                        |
| Hospital Da Barbanza                           | Galicia                         | 5                         |
| Fundación Hospital Calahorra                   | La Rioja                        | 1                         |
| Hospital San Pedro                             | La Rioja                        | 13                        |
| Hospital Severo Ochoa                          | Madrid                          | 21                        |
| Hospital Universitario 12 De Octubre*          | Madrid                          | 4                         |
| Hospital Universitario La Paz*                 | Madrid                          | 16                        |
| Hospital Universitario Dr. Peset Aleixandre    | Valencia                        | 1                         |
| *Tertiary hospital                             |                                 |                           |



## Appendix 2. Comparability analysis and description of the missing data imputation model

### Comparability analysis

For comparability analysis, the baseline characteristics of patients (gender, age, HbA1c, BMI, time since diagnosis, presence of comorbidities, and pubertal stage) were compared between participants who completed the different follow-up phases and those who had total or partial loss to follow-up at 3, 6, and 12 months. No significant differences were found for any of these variables at the 3-month follow-up. At 6 months, significant differences were observed between responders and non-responders in relation to pubertal stage V (25% vs. 75%) ( $p = 0.04$ ). At the 12-month follow-up, differences were observed in pubertal stages IV (21.7% vs. 78.3%) and V (31.2% vs. 68.8%) ( $p = 0.007$ ); significant differences were also observed in the mean age value ( $p = 0.04$ ) between responders (12.3 years) and non-responders (13.7 years).

|                                  | 3 months                             |                                                 |       | 6 months                              |                                                 |              | 12 months                             |                                                 |              |
|----------------------------------|--------------------------------------|-------------------------------------------------|-------|---------------------------------------|-------------------------------------------------|--------------|---------------------------------------|-------------------------------------------------|--------------|
|                                  | Participants lost to follow-up (n=6) | Participants who continued in the study (n=150) | p     | Participants lost to follow-up (n=20) | Participants who continued in the study (n=136) | p            | Participants lost to follow-up (n=28) | Participants who continued in the study (n=128) | p            |
| Sex (male), n (%)                | 4 (4.7)                              | 82 (95.3)                                       | 0.562 | 8 (9.3)                               | 78 (90.7)                                       | 0.145        | 16 (18.6)                             | 70 (81.4)                                       | 0.813        |
| Age (years), mean (SD)           | 13 (4.86)                            | 12.55 (3.09)                                    | 0.829 | 13.3 (3.81)                           | 12.46 (3.05)                                    | 0.266        | 13.68 (2.91)                          | 12.32 (3.17)                                    | <b>0.039</b> |
| HbA1c, mean (SD)                 | 8.42 (0.62)                          | 7.83 (1.38)                                     | 0.303 | 8.36 (2.01)                           | 7.78 (1.23)                                     | 0.224        | 8.08 (1.81)                           | 7.81 (1.24)                                     | 0.33         |
| BMI, mean (SD)                   | 20.73 (2.87)                         | 20.28 (4.10)                                    | 0.789 | 21.33 (2.91)                          | 20.14 (4.18)                                    | 0.224        | 21.33 (2.88)                          | 20.07 (4.24)                                    | 0.135        |
| Duración de la DM1, mean (SD)    | 7.19 (3.86)                          | 5.59 (3.37)                                     | 0.257 | 6.42 (3.43)                           | 5.54 (3.38)                                     | 0.275        | 6.74 (3.39)                           | 5.41 (3.36)                                     | 0.061        |
| Presence of comorbidities, n (%) | 1 (2.0)                              | 49 (98.0)                                       | 0.41  | 7 (14)                                | 43 (86)                                         | 0.762        | 9 (18)                                | 41 (82)                                         | 0.991        |
| Pubertal status, n (%)           |                                      |                                                 | 0.473 |                                       |                                                 | <b>0.043</b> |                                       |                                                 | <b>0.007</b> |
| I                                | 2 (3.9)                              | 49 (96.1)                                       |       | 5 (9.8)                               | 46 (90.2)                                       |              | 5 (9.8)                               | 46 (90.2)                                       |              |
| II                               | 0 (0)                                | 14 (100)                                        |       | 1 (7.1)                               | 13 (92.9)                                       |              | 3 (21.4)                              | 11 (78.6)                                       |              |
| III                              | 0 (0)                                | 20 (100)                                        |       | 0 (0)                                 | 20 (100)                                        |              | 0 (0)                                 | 20 (100)                                        |              |
| IV                               | 0 (0)                                | 23 (100)                                        |       | 2 (8.7)                               | 21 (91.3)                                       |              | 5 (21.7)                              | 18 (78.3)                                       |              |
| V                                | 4 (8.3)                              | 44 (91.7)                                       |       | 12 (25)                               | 36 (75)                                         |              | 15 (31.2)                             | 33 (68.8)                                       |              |

SD = Standard deviation; HbA1c = Glycated haemoglobin; BMI = Body mass index.

### Description of the missing data imputation model

For multiple imputation was performed by chained equations using Stata 15.0 software. The variables sex, age, pubertal stage, presence of comorbidities and duration of diabetes were considered regular and used as predictors for imputation. A total of 29 variables were imputed. Each variable was imputed in chronological order: 3, 6 and 12 months. As a general rule, the latest available information on the variable to be imputed was used. When information from other variables was used, the information from the same point in time was used. A total of 10 imputations were made for each missing data.

| Order | Imputed variable                                       | Variables used in imputation                                                                                                                                                                                                       | Imputation model | n (%) missing |
|-------|--------------------------------------------------------|------------------------------------------------------------------------------------------------------------------------------------------------------------------------------------------------------------------------------------|------------------|---------------|
| 1     | HbA1c 3M                                               | Sex, Age, Pubertal stage, Presence of comorbidities, Time since diagnosis, HbA1c Baseline                                                                                                                                          | pmm              | 7 (4.5)       |
| 2     | HbA1c 6M                                               | Sex, Age, Pubertal stage, Presence of comorbidities, Time since diagnosis, HbA1c 3M                                                                                                                                                | pmm              | 20 (12.8)     |
| 3     | HbA1c 12M                                              | Sex, Age, Pubertal stage, Presence of comorbidities, Time since diagnosis, HbA1c 6M                                                                                                                                                | pmm              | 28 (17.9)     |
| 4     | BMI 6M                                                 | Sex, Age, Pubertal stage, Presence of comorbidities, Time since diagnosis, BMI Baseline                                                                                                                                            | pmm              | 24 (15.4)     |
| 5     | BMI 12M                                                | Sex, Age, Pubertal stage, Presence of comorbidities, Time since diagnosis, BMI 6M                                                                                                                                                  | pmm              | 28 (17.9)     |
| 6     | N. <sup>o</sup> severe hypoglycaemia events 3M         | Sex, Age, Pubertal stage, Presence of comorbidities, Time since diagnosis, N. <sup>o</sup> severe hypoglycaemia events Baseline                                                                                                    | poisson          | 7 (4.5)       |
| 7     | N. <sup>o</sup> severe hypoglycaemia events 6M         | Sex, Age, Pubertal stage, Presence of comorbidities, Time since diagnosis, N. <sup>o</sup> severe hypoglycaemia events 3M                                                                                                          | poisson          | 7 (4.5)       |
| 8     | N. <sup>o</sup> severe hypoglycaemia events 12M        | Sex, Age, Pubertal stage, Presence of comorbidities, Time since diagnosis, N. <sup>o</sup> severe hypoglycaemia events 6M                                                                                                          | poisson          | 7 (4.5)       |
| 9     | N. <sup>o</sup> severe hypoglycaemia events on EHR 3M  | Sex, Age, Pubertal stage, Presence of comorbidities, Time since diagnosis, N. <sup>o</sup> severe hypoglycaemia events 3M, N. <sup>o</sup> severe hypoglycaemia events on EHR Baseline                                             | poisson          | 8 (5.1)       |
| 10    | N. <sup>o</sup> severe hypoglycaemia events on EHR 6M  | Sex, Age, Pubertal stage, Presence of comorbidities, Time since diagnosis, N. <sup>o</sup> severe hypoglycaemia events 6M, N. <sup>o</sup> severe hypoglycaemia events on EHR 3M                                                   | poisson          | 28 (17.9)     |
| 11    | N. <sup>o</sup> severe hypoglycaemia events on EHR 12M | Sex, Age, Pubertal stage, Presence of comorbidities, Time since diagnosis, N. <sup>o</sup> severe hypoglycaemia events 12M, N. <sup>o</sup> severe hypoglycaemia events on EHR 6M                                                  | poisson          | 28 (17.9)     |
| 12    | VAS 12M                                                | Sex, Age, Pubertal stage, Presence of comorbidities, Time since diagnosis, Mobility EQ-5D-Y 12M, Self-care EQ-5D-Y 12M, Habitual activities EQ-5D-Y 12M, Pain/discomfort EQ-5D-Y 12M, Anxiety/depression EQ-5D-Y 12M, VAS Baseline | pmm              | 36 (23.1)     |
| 13    | Knowledge about Baseline                               | Sex, Age, Pubertal stage, Presence of comorbidities, Time since diagnosis, HbA1c Baseline, BMI Baseline                                                                                                                            | pmm              | 14 (9.0)      |
| 14    | Knowledge about 12M                                    | Sex, Age, Pubertal stage, Presence of comorbidities, Time since diagnosis, HbA1c 12M, BMI 12M, Knowledge about Baseline                                                                                                            | pmm              | 48 (30.8)     |
| 15    | Hyperglycaemia DTSQ Baseline                           | Sex, Age, Pubertal stage, Presence of comorbidities, Time since diagnosis, HbA1c Baseline, Knowledge about Baseline                                                                                                                | pmm              | 14 (9.0)      |
| 16    | Hyperglycaemia DTSQ 12M                                | Sex, Age, Pubertal stage, Presence of comorbidities, Time since diagnosis, HbA1c 12M, Knowledge about 12M, Hyperglycaemia DTSQ Baseline                                                                                            | pmm              | 48 (30.8)     |
| 17    | Hypoglycaemia DTSQ Baseline                            | Sex, Age, Pubertal stage, Presence of comorbidities, Time since diagnosis                                                                                                                                                          | pmm              | 14 (9.0)      |
| 18    | Hypoglycaemia DTSQ 12M                                 | Sex, Age, Pubertal stage, Presence of comorbidities, Time since diagnosis, Hypoglycaemia DTSQ Baseline                                                                                                                             | pmm              | 48 (30.8)     |

|                                                                                                                                                                                                                                                                                                      |                                           |                                                                                                                                                                                                                                                     |     |           |
|------------------------------------------------------------------------------------------------------------------------------------------------------------------------------------------------------------------------------------------------------------------------------------------------------|-------------------------------------------|-----------------------------------------------------------------------------------------------------------------------------------------------------------------------------------------------------------------------------------------------------|-----|-----------|
| 19                                                                                                                                                                                                                                                                                                   | Satisfaction with treatment DTSQ Baseline | Sex. Age. Pubertal stage. Presence of comorbidities. Time since diagnosis. N.º severe hypoglycaemia events Baseline. N.º severe hypoglycaemia events on EHR Baseline. Knowledge about Baseline. Hyperglycaemia DTSQ Baseline.                       | pmm | 14 (9.0)  |
| 20                                                                                                                                                                                                                                                                                                   | Satisfaction with treatment DTSQ 12M      | Sex. Age. Pubertal stage. Presence of comorbidities. Time since diagnosis. N.º severe hypoglycaemia events 12M. N.º severe hypoglycaemia events on EHR 12M. Knowledge about 12M. Hyperglycaemia DTSQ 12M. Satisfaction with treatment DTSQ Baseline | pmm | 48 (30.8) |
| 21                                                                                                                                                                                                                                                                                                   | N.º of daily scans 3M                     | Sex. Age. Pubertal stage. Presence of comorbidities. Time since diagnosis. HbA1c 3M. BMI Baseline. N.º severe hypoglycaemia events 3M                                                                                                               | pmm | 8 (5.1)   |
| 22                                                                                                                                                                                                                                                                                                   | N.º of daily scans 6M                     | Sex. Age. Pubertal stage. Presence of comorbidities. Time since diagnosis. HbA1c 6M. BMI 6M. N.º severe hypoglycaemia events 6M. N.º of daily scans 3M                                                                                              | pmm | 19 (12.2) |
| 23                                                                                                                                                                                                                                                                                                   | N.º of daily scans 12M                    | Sex. Age. Pubertal stage. Presence of comorbidities. Time since diagnosis. HbA1c 12M. BMI 12M. N.º severe hypoglycaemia events 12M. N.º of daily scans 6M                                                                                           | pmm | 28 (17.9) |
| 24                                                                                                                                                                                                                                                                                                   | Sensor usage time 3M                      | Sex. Age. Pubertal stage. Presence of comorbidities. Time since diagnosis. HbA1c 3M. N.º ketoacidosis 3M. N.º of daily scans 3M                                                                                                                     | pmm | 8 (5.1)   |
| 25                                                                                                                                                                                                                                                                                                   | Sensor usage time 6M                      | Sex. Age. Pubertal stage. Presence of comorbidities. Time since diagnosis. HbA1c 6M. N.º ketoacidosis 6M. N.º of daily scans 6M. Sensor usage time 3M                                                                                               | pmm | 19 (12.2) |
| 26                                                                                                                                                                                                                                                                                                   | Sensor usage time 12M                     | Sex. Age. Pubertal stage. Presence of comorbidities. Time since diagnosis. HbA1c 12M. N.º ketoacidosis 12M. N.º of daily scans 12M. Sensor usage time 6M                                                                                            | pmm | 28 (17.9) |
| 27                                                                                                                                                                                                                                                                                                   | N.º Sensors 3M                            | Sex. Age. Pubertal stage. Presence of comorbidities. Time since diagnosis. N.º ketoacidosis 3M. Sensor usage time 3M                                                                                                                                | pmm | 7 (4.5)   |
| 28                                                                                                                                                                                                                                                                                                   | N.º Sensors 6M                            | Sex. Age. Pubertal stage. Presence of comorbidities. Time since diagnosis. N.º ketoacidosis 6M. Sensor usage time 6M. N.º Sensors 3M                                                                                                                | pmm | 19 (12.2) |
| 29                                                                                                                                                                                                                                                                                                   | N.º Sensors 12M                           | Sex. Age. Pubertal stage. Presence of comorbidities. Time since diagnosis. N.º ketoacidosis 12M. Sensor usage time 12M. N.º Sensors 6M                                                                                                              | pmm | 28 (17.9) |
| DM = Diabetes Mellitus; T1DM = Type 1 Diabetes Mellitus; DTSQ = Diabetes Treatment Satisfaction Questionnaire; EQ-5D-Y = Health-related quality of life questionnaire; VAS = visual analogue scale; HbA1c = Glycated haemoglobin; EHR = Electronic Health Record; BMI = Body mass index; M = Months. |                                           |                                                                                                                                                                                                                                                     |     |           |

### Appendix 3. Cost estimation

#### List of tables:

Table A1. Use of resources and unit costs

Table A2. Total annual cost per patient of the FSL flash glucose monitoring system (€2021)

Table A3. Average number of test strips and lancets per patient and total annual costs due to lost parent/caregiver productivity before and after FSL use.

#### List of figures:

Figure A1. Total annual costs per patient before and after use of the FSL (does not include cost of device)

**Table A1. Use of resources and unit costs**

|                                 | <b>Unit cost €2021<br/>(SD)</b> | <b>Source</b>                            |
|---------------------------------|---------------------------------|------------------------------------------|
| Hospitalization /day            | 652.58 (188.86)                 | Public tariff*                           |
| Visit to specialist             | 95.65 (33.98)                   | Public tariff*                           |
| Visit to nurse at primary care  | 27.06 (7.52)                    | Public tariff*                           |
| Hospital emergency              | 207.54 (72.03)                  | Public tariff*                           |
| Visit to doctor at primary care | 50.91 (17.63)                   | Public tariff*                           |
| Non-hospital emergency          | 99.41 (22.83)                   | Public tariff*                           |
| HbA1c determination             | 7.15 (5.16)                     | Public tariff*                           |
| Test strips                     | 0.43 (0.15)                     | Consult*                                 |
| Lancets                         | 0.109 (0.11)                    | Consult*                                 |
| FSL sensor device               | 43.27                           | Information provided by the manufacturer |
| Absenteeism day                 | 166.896                         | Estimate based on Eurostat and INE       |

FSL = FreeStyle Libre®; SD = Standard Deviation

\* Spanish autonomous communities.

INE = Spanish Statistical Office.

Unit costs come from different sources, all national, and include official tariffs. Where possible, the average costs of those Spanish regions for which data were available were taken into account

To estimate the unit cost of test strips and lancets, the Spanish regions were consulted for their spending on these products. There was great heterogeneity between regions, not only in the unit cost (between €0.10 and €0.48), but also in the products financed, since lancets are only financed in some regions.

**Table A2. Total annual cost per patient of the FSL flash glucose monitoring system (€2021)**

|                | <b>Primary care</b> | <b>Emergency</b>  | <b>Specialist</b>   | <b>Laboratory</b> | <b>Monitoring*</b>    | <b>Total costs</b> |
|----------------|---------------------|-------------------|---------------------|-------------------|-----------------------|--------------------|
| Mean (SD)      | 136.78<br>(101.28)  | 50.70<br>(161.66) | 415.48<br>(129.53)  | 29.05 (5.87)      | 1572.25<br>(317.58)   | 2204.26 (425.73)   |
| Min. –<br>Max. | 0 – 474.24          | 0 – 1245.24       | 0 – 956.5           | 14.30 –<br>71.50  | 1125 – 2420.39        | 1344.90 – 3626.20  |
| CI95%          | (119.88;<br>154.65) | (25.74;<br>80.73) | (393.81;<br>438.65) | (28.1;<br>30.16)  | (1519.13;<br>1627.46) | (2131.33; 2278.01) |

CI95% = Confidence interval at 95% by Bootstrap based on 10,000 samples; Max. = Maximum; Min. = Minimum; SD = Standard Deviation

\*Including cost of test strips and lancets, and cost of sensor

**Table A3. Average number of test strips and lancets per patient and total annual costs due to lost parent/caregiver productivity before and after FSL use.**

|                                                                                                     | Before use of the flash glucose monitoring system | After use of the flash glucose monitoring system |
|-----------------------------------------------------------------------------------------------------|---------------------------------------------------|--------------------------------------------------|
| <b>Average number of test strips and lancets per patient before and after use of the FSL device</b> |                                                   |                                                  |
| Yearly test strips, mean (SD)                                                                       | 2686.02 (527.63)                                  | 883.98 (669.45)                                  |
| Yearly Lancets, mean (SD)                                                                           | 1366.41 (1063.44)                                 | 615.94 (482.03)                                  |
| <b>Total annual cost per patient due to productivity losses (€2021)</b>                             |                                                   |                                                  |
| Mean (SD)                                                                                           | 545.67 (588.29)                                   | 262.73 (334.30)                                  |
| Min. – Max.                                                                                         | 0 – 3504.82                                       | 0 – 1668.96                                      |
| CI95%                                                                                               | (448.55; 650.63)                                  | (206.65; 322.71)                                 |

CI95% = Confidence interval at 95% by Bootstrap based on 10,000 samples; Max. = Maximum; Min. = Minimum; SD = Standard Deviation

Figure A1. Total annual costs per patient before and after use of the FSL

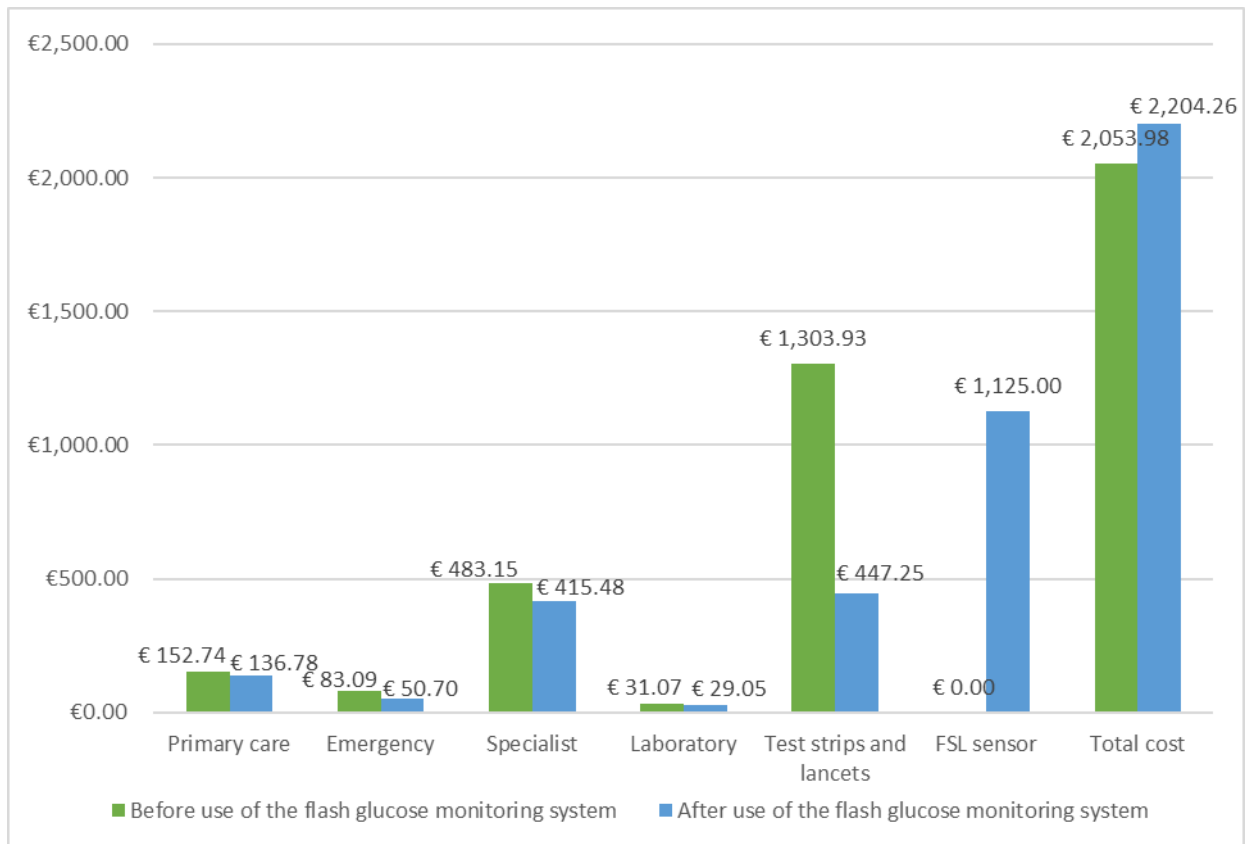

#### Appendix 4. Evolution of outcome measures during follow-up (by age group and baseline HbA1c control)

|                                                                                         | Baseline    | 3 months    | 6 months    | 12 months   | Differences 12 months-Baseline |
|-----------------------------------------------------------------------------------------|-------------|-------------|-------------|-------------|--------------------------------|
| <b>HbA1c, mean (SD)</b>                                                                 |             |             |             |             |                                |
| Total                                                                                   | 7.86 (1.36) | 7.58 (1.27) | 7.59 (1.16) | 7.73 (1.06) | -0.13 (-0.42; 0.16)            |
| HbA1c <7.5%                                                                             | 6.82 (0.36) | 6.86 (0.55) | 6.96 (0.6)  | 7.14 (0.57) | 0.32 (0.15; 0.49)              |
| HbA1c ≥7.5%                                                                             | 8.65 (1.31) | 8.18 (1.38) | 8.14 (1.25) | 8.2 (1.12)  | -0.45 (-0.84; -0.06)           |
| < 12 years                                                                              | 7.83 (1.17) | 7.42 (0.93) | 7.53 (0.96) | 7.57 (0.8)  | -0.26 (-0.59; 0.07)            |
| ≥ 12 years                                                                              | 7.87 (1.45) | 7.66 (1.41) | 7.63 (1.26) | 7.82 (1.19) | -0.05 (-0.45; 0.35)            |
| <b>With self-reported severe hypoglycemia, n (%)</b>                                    |             |             |             |             |                                |
| Total                                                                                   | 49 (31.4)   | -           | -           | 55 (36.9)   | 5.5% (-12.7; 23.7)             |
| HbA1c <7.5%                                                                             | 26 (38.2)   | -           | -           | 24 (35.3)   | -2.9% (-29.6; 23.8)            |
| HbA1c ≥7.5%                                                                             | 23 (26.1)   | -           | -           | 31 (38.3)   | 12.2% (-12.6; 37.0)            |
| < 12 years                                                                              | 22 (41.5)   | -           | -           | 19 (37.3)   | -4.2% (-34.1; 25.7)            |
| ≥ 12 years                                                                              | 27 (26.2)   | -           | -           | 36 (36.7)   | 10.5% (-12.4; 33.4)            |
| <b>Nº. Self-reported severe hypoglycemia, mean (SD)</b>                                 |             |             |             |             |                                |
| Total                                                                                   | 1.72 (3.65) | -           | -           | 1.77 (5.08) | 0.05 (-0.98; 1.1)              |
| HbA1c <7.5%                                                                             | 2.34 (4.13) | -           | -           | 1.95 (5.69) | -0.39 (-2.2; 1.4)              |
| HbA1c ≥7.5%                                                                             | 1.26 (3.19) | -           | -           | 1.63 (4.58) | 0.37 (-0.86; 1.6)              |
| < 12 years                                                                              | 2.12 (4.04) | -           | -           | 1.06 (3.65) | -1.06 (-2.6; 0.48)             |
| ≥ 12 years                                                                              | 1.52 (3.43) | -           | -           | 2.20 (5.76) | 0.68 (-0.69; 2.1)              |
| <b>With severe hypoglycemia in the electronic clinical record, n (%)</b>                |             |             |             |             |                                |
| Total                                                                                   | 19 (12.2)   | -           | -           | 23 (15.4)   | 3.2% (-17.6; 24.0)             |
| HbA1c <7.5%                                                                             | 6 (8.8)     | -           | -           | 6 (8.8)     | 0% (-32.0; 32.0)               |
| HbA1c ≥7.5%                                                                             | 13 (14.8)   | -           | -           | 17 (21.0)   | 6.2% (-21.1; 33.5)             |
| < 12 years                                                                              | 9 (17.0)    | -           | -           | 6 (11.8)    | -5.2% (-40.8; 30.4)            |
| ≥ 12 years                                                                              | 10 (9.7)    | -           | -           | 17 (17.4)   | 7.7% (-0.18; 0.33)             |
| <b>N.º Hypoglycemia in the electronic clinical record prior to the study, mean (SD)</b> |             |             |             |             |                                |
| Total                                                                                   | 0.39 (1.68) | -           | -           | 0.54 (1.58) | 0.15 (-0.23; 0.53)             |
| HbA1c <7.5%                                                                             | 0.13 (0.45) | -           | -           | 0.25 (1.06) | 0.12 (-0.16; 0.40)             |
| HbA1c ≥7.5%                                                                             | 0.59 (2.18) | -           | -           | 0.78 (1.88) | 0.19 (-0.43; 0.81)             |
| < 12 years                                                                              | 0.34 (1.02) | -           | -           | 0.61 (1.89) | 0.27 (-0.32; 0.86)             |
| ≥ 12 years                                                                              | 0.42 (1.94) | -           | -           | 0.5 (1.40)  | 0.08 (-0.39; 0.55)             |
| <b>Health-related quality of life (EQ-5D-Y), n (%)</b>                                  |             |             |             |             |                                |
| <b>Mobility (no problems), n (%)</b>                                                    |             |             |             |             |                                |
| Total                                                                                   | 156 (100)   | -           | -           | 124 (100)   | -                              |
| HbA1c <7.5%                                                                             | 68 (100)    | -           | -           | 54 (100)    | -                              |
| HbA1c ≥7.5%                                                                             | 88 (100)    | -           | -           | 70 (100)    | -                              |
| < 12 years                                                                              | 53 (100)    | -           | -           | 47 (100)    | -                              |
| ≥ 12 years                                                                              | 103 (100)   | -           | -           | 77 (100)    | -                              |
| <b>Self-Care (no problems), n (%)</b>                                                   |             |             |             |             |                                |
| Total                                                                                   | 154 (98.7)  | -           | -           | 123 (99.2)  | -                              |
| HbA1c <7.5%                                                                             | 67 (98.5)   | -           | -           | 54 (100)    | -                              |
| HbA1c ≥7.5%                                                                             | 87 (98.9)   | -           | -           | 69 (98.6)   | -                              |
| < 12 years                                                                              | 51 (96.2)   | -           | -           | 47 (100)    | -                              |
| ≥ 12 years                                                                              | 103 (100)   | -           | -           | 76 (98.7)   | -                              |
| <b>Usual Activities (no problems), n (%)</b>                                            |             |             |             |             |                                |
| Total                                                                                   | 154 (98.7)  | -           | -           | 122 (98.4)  | -                              |
| HbA1c <7.5%                                                                             | 67 (98.5)   | -           | -           | 53 (98.1)   | -                              |
| HbA1c ≥7.5%                                                                             | 87 (98.9)   | -           | -           | 69 (98.6)   | -                              |
| < 12 years                                                                              | 53 (100)    | -           | -           | 47 (100)    | -                              |
| ≥ 12 years                                                                              | 101 (98.1)  | -           | -           | 75 (97.4)   | -                              |
| <b>Pain or Discomfort (no pain), n (%)</b>                                              |             |             |             |             |                                |
| Total                                                                                   | 144 (92.3)  | -           | -           | 118 (95.2)  | -                              |
| HbA1c <7.5%                                                                             | 62 (91.2)   | -           | -           | 53 (98.1)   | -                              |
| HbA1c ≥7.5%                                                                             | 82 (93.2)   | -           | -           | 65 (92.9)   | -                              |



|                                                                                                |                 |                 |                 |                  |                                |
|------------------------------------------------------------------------------------------------|-----------------|-----------------|-----------------|------------------|--------------------------------|
| < 12 years                                                                                     | 50 (94.3)       | -               | -               | 45 (95.7)        | -                              |
| ≥ 12 years                                                                                     | 94 (91.3)       | -               | -               | 73 (94.8)        | -                              |
| <b>Pain or Discomfort (some pain), n (%)</b>                                                   |                 |                 |                 |                  |                                |
| Total                                                                                          | 12 (7.7)        | -               | -               | 6 (4.8)          | -                              |
| HbA1c <7.5%                                                                                    | 6 (8.8)         | -               | -               | 1 (1.9)          | -                              |
| HbA1c ≥7.5%                                                                                    | 6 (6.8)         | -               | -               | 5 (7.1)          | -                              |
| < 12 years                                                                                     | 3 (5.7)         | -               | -               | 2 (4.3)          | -                              |
| ≥ 12 years                                                                                     | 9 (8.7)         | -               | -               | 4 (5.2)          | -                              |
| <b>Anxiety/Depression (no problems), n (%)</b>                                                 |                 |                 |                 |                  |                                |
| Total                                                                                          | 137 (87.8)      | -               | -               | 112 (90.3)       | -                              |
| HbA1c <7.5%                                                                                    | 62 (91.2)       | -               | -               | 50 (92.6)        | -                              |
| HbA1c ≥7.5%                                                                                    | 75 (85.2)       | -               | -               | 62 (88.6)        | -                              |
| < 12 years                                                                                     | 49 (92.5)       | -               | -               | 44 (93.6)        | -                              |
| ≥ 12 years                                                                                     | 88 (85.4)       | -               | -               | 68 (88.3)        | -                              |
| <b>Anxiety/Depression (some problems), n (%)</b>                                               |                 |                 |                 |                  |                                |
| Total                                                                                          | 16 (10.3)       | -               | -               | 10 (8.1)         | -                              |
| HbA1c <7.5%                                                                                    | 5 (7.4)         | -               | -               | 4 (7.4)          | -                              |
| HbA1c ≥7.5%                                                                                    | 11 (12.5)       | -               | -               | 6 (8.6)          | -                              |
| < 12 years                                                                                     | 3 (5.7)         | -               | -               | 2 (4.3)          | -                              |
| ≥ 12 years                                                                                     | 13 (12.6)       | -               | -               | 8 (10.4)         | -                              |
| <b>VAS, mean (sd)</b>                                                                          |                 |                 |                 |                  |                                |
| Total                                                                                          | 87.63 (12.46)   | -               | -               | 84.17 (12.28)    | -3.5 (-6.4; -0.53)             |
| HbA1c <7.5%                                                                                    | 88.79 (10.05)   | -               | -               | 87.92 (10.08)    | 0.29 (-3.9; 4.5)               |
| HbA1c ≥7.5%                                                                                    | 86.74 (14.04)   | -               | -               | 81.29 (16.29)    | -7.5 (-11.7; -3.3)             |
| < 12 years                                                                                     | 91.66 (9.72)    | -               | -               | 85.61 (14.97)    | -6.1 (-11.0; -1.1)             |
| ≥ 12 years                                                                                     | 85.56 (13.23)   | -               | -               | 83.27 (13.86)    | -2.3 (-6.3; 1.7)               |
| <b>Knowledge of diabetes treatment (modified version of Mitchell questionnaire), mean (SD)</b> |                 |                 |                 |                  |                                |
| Total                                                                                          | 11.68 (2.13)    | -               | -               | 12.09 (1.94)     | 0.41 (-0.11; 0.93)             |
| HbA1c <7.5%                                                                                    | 12.38 (1.98)    | -               | -               | 12.92 (1.35)     | 0.54 (-0.11; 1.2)              |
| HbA1c ≥7.5%                                                                                    | 11.12 (2.08)    | -               | -               | 11.38 (2.08)     | 0.26 (-0.45; 0.97)             |
| < 12 years                                                                                     | 11.87 (2.07)    | -               | -               | 11.9 (2.31)      | 0.03 (-0.90; 0.96)             |
| ≥ 12 years                                                                                     | 11.59 (2.16)    | -               | -               | 12.21 (1.67)     | 0.62 (-0.001; 1.2)             |
| <b>Diabetes Treatment Satisfaction Questionnaire (DTSQ)</b>                                    |                 |                 |                 |                  |                                |
| <b>Perceived hyperglycemia, mean (SD)</b>                                                      |                 |                 |                 |                  |                                |
| Total                                                                                          | 3.53 (1.51)     | -               | -               | 3.32 (1.44)      | -0.21 (-0.58; 0.16)            |
| HbA1c <7.5%                                                                                    | 2.94 (1.28)     | -               | -               | 2.88 (1.44)      | -0.06 (-0.57; 0.45)            |
| HbA1c ≥7.5%                                                                                    | 4.01 (1.51)     | -               | -               | 3.71 (1.34)      | -0.3 (-0.79; 0.19)             |
| < 12 years                                                                                     | 3.62 (1.38)     | -               | -               | 3.44 (1.48)      | -0.18 (-0.79; 0.43)            |
| ≥ 12 years                                                                                     | 3.48 (1.57)     | -               | -               | 3.25 (1.42)      | -0.23 (-0.71; 0.25)            |
| <b>Perceived hypoglycemia, mean (SD)</b>                                                       |                 |                 |                 |                  |                                |
| Total                                                                                          | 2.22 (1.35)     | -               | -               | 2.04 (1.32)      | -0.18 (-0.52; 0.16)            |
| HbA1c <7.5%                                                                                    | 2.3 (1.36)      | -               | -               | 2 (1.31)         | -0.3 (-0.80; 0.20)             |
| HbA1c ≥7.5%                                                                                    | 2.15 (1.35)     | -               | -               | 2.07 (1.34)      | -0.08 (-0.54; 0.38)            |
| < 12 years                                                                                     | 2.19 (1.17)     | -               | -               | 2.05 (1.26)      | -0.14 (-0.66; 0.38)            |
| ≥ 12 years                                                                                     | 2.23 (1.44)     | -               | -               | 2.03 (1.36)      | -0.2 (-0.64; 0.24)             |
| <b>Satisfaction with treatment, mean (SD)</b>                                                  |                 |                 |                 |                  |                                |
| Total                                                                                          | 25.89 (6.7)     | -               | -               | 29.82 (5.44)     | 3.93 (2.4; 5.5)                |
| HbA1c <7.5%                                                                                    | 26.58 (7.04)    | -               | -               | 29.78 (5.1)      | 3.2 (0.86; 5.5)                |
| HbA1c ≥7.5%                                                                                    | 25.33 (6.41)    | -               | -               | 29.86 (5.77)     | 4.53 (2.4; 6.6)                |
| < 12 years                                                                                     | 25.79 (6.71)    | -               | -               | 29.61 (5.87)     | 3.82 (1.1; 6.5)                |
| ≥ 12 years                                                                                     | 25.95 (6.73)    | -               | -               | 29.96 (5.21)     | 4.01 (2.1; 5.9)                |
|                                                                                                | <b>Baseline</b> | <b>3 months</b> | <b>6 months</b> | <b>12 months</b> | <b>Differences 12-3 months</b> |
| <b>Sensor usage time (%), mean (SD)</b>                                                        |                 |                 |                 |                  |                                |
| Total                                                                                          | -               | 81.60 (20.78)   | 84.42 (19.47)   | 88.55 (18.48)    | 6.95 (2.3; 11.6)               |
| HbA1c <7.5%                                                                                    | -               | 83.99 (21.93)   | 86.60 (17.2)    | 91.70 (15.09)    | 7.71 (0.90; 14.5)              |
| HbA1c ≥7.5%                                                                                    | -               | 79.63 (19.69)   | 82.57 (21.16)   | 86.01 (20.57)    | 6.38 (-0.8; 12.8)              |
| < 12 years                                                                                     | -               | 87.59 (15.06)   | 90.60 (14.34)   | 94.51 (11.81)    | 6.92 (1.5; 12.3)               |

|                                           |   |               |               |               |                   |
|-------------------------------------------|---|---------------|---------------|---------------|-------------------|
| ≥ 12 years                                | - | 78.45 (22.67) | 81.09 (21.07) | 84.85 (20.84) | 6.4 (-0.14; 12.9) |
| <b>Number of scans per day, mean (SD)</b> |   |               |               |               |                   |
| Total                                     | - | 9.16 (5.06)   | 9.33 (4.97)   | 9.84 (6.02)   | 0.68 (-0.64; 2.0) |
| HbA1c <7.5%                               | - | 10.06 (5.11)  | 9.89 (5.07)   | 10.39 (5.45)  | 0.33 (-1.6; 2.2)  |
| HbA1c ≥7.5%                               | - | 8.41 (4.92)   | 8.85 (4.86)   | 9.39 (6.46)   | 0.98 (-0.87; 2.8) |
| < 12 years                                | - | 11.67 (5.64)  | 11.27 (4.5)   | 12.96 (6.45)  | 1.29 (-1.1; 3.7)  |
| ≥ 12 years                                | - | 7.83 (4.17)   | 8.27 (4.91)   | 7.90 (4.85)   | 0.07 (-1.3; 1.4)  |
| <b>Number of sensors used, mean (SD)</b>  |   |               |               |               |                   |
| Total                                     | - | 6.40 (1.36)   | 7.50 (2.86)   | 14.74 (5.81)  | 8.34 (7.4; 9.3)   |
| HbA1c <7.5%                               | - | 6.32 (1.37)   | 6.86 (1.76)   | 13.35 (4.47)  | 7.03 (5.9; 8.2)   |
| HbA1c ≥7.5%                               | - | 6.46 (1.36)   | 8.05 (3.46)   | 15.86 (6.51)  | 9.4 (7.9; 10.9)   |
| < 12 years                                | - | 6.63 (1.17)   | 6.90 (2.15)   | 14.73 (5.83)  | 8.1 (6.5; 7.8)    |
| ≥ 12 years                                | - | 6.28 (1.44)   | 7.83 (3.15)   | 14.75 (5.83)  | 8.47 (7.3; 9.7)   |

SD = standard deviation; VAS = Visual Analogue Scale; HbA1c = Glycosylated Haemoglobin; CI = Confidence Interval; GT = glucose time.

Appendix 5. Multivariate Mixed Regression Model for Effectiveness Measures and Adherence

**Table 1. Multivariate Mixed Regression Model for Effectiveness Measures**

| Variable                                                        | Self-reported severe hypoglycaemia events                    |      |                                                        |             | Severe hypoglycaemic events in the clinical history          |      |                                                        |             | Visual analogue scale (EQ-5D-Y) |             |                     |      |                      |             | Knowledge of diabetes treatment |                 | Diabetes Treatment Satisfaction Questionnaire    |                 |                                                 |      |                                                     |             |
|-----------------------------------------------------------------|--------------------------------------------------------------|------|--------------------------------------------------------|-------------|--------------------------------------------------------------|------|--------------------------------------------------------|-------------|---------------------------------|-------------|---------------------|------|----------------------|-------------|---------------------------------|-----------------|--------------------------------------------------|-----------------|-------------------------------------------------|------|-----------------------------------------------------|-------------|
|                                                                 | Patients with hypoglycaemia (Yes/No)<br>Total sample (n=156) |      | Number of self-reported events<br>Total sample (n=156) |             | Patients with hypoglycaemia (Yes/No)<br>Total sample (n=156) |      | Number of self-reported events<br>Total sample (n=156) |             | Total sample (n=156)            |             | HbA1c <7.5% (n=68)  |      | HbA1c ≥7.5% (n=88)   |             | Total sample (n=156)            |                 | Perceived hyperglycaemia<br>Total sample (n=156) |                 | Perceived hypoglycaemia<br>Total sample (n=156) |      | Satisfaction with treatment<br>Total sample (n=156) |             |
|                                                                 | OR (95%CI)                                                   | P    | β (95%CI)                                              | P           | OR (95%CI)                                                   | P    | β (95%CI)                                              | P           | B (95%CI)                       | P           | B (95%CI)           | P    | B (95%CI)            | P           | B (95%CI)                       | P               | B (95%CI)                                        | P               | B (95%CI)                                       | P    | B (95%CI)                                           | P           |
| <b>Time</b>                                                     |                                                              |      |                                                        |             |                                                              |      |                                                        |             |                                 |             |                     |      |                      |             |                                 |                 |                                                  |                 |                                                 |      |                                                     |             |
| M12 (ref: M0)                                                   | 0.82 (0.35; 1.96)                                            | .659 | -0.37 (-0.62; -0.11)                                   | <b>.004</b> | 1.47 (0.32; 6.77)                                            | .617 | 0.77 (-0.06; 1.60)                                     | .069        | -1.40 (-4.97; 2.16)             | .440        | -1.33 (-4.17; 1.51) | .359 | -6.03 (-9.66; -2.41) | <b>.001</b> | 0.45 (-0.17; 1.08)              | .154            | -0.08 (-0.50; 0.34)                              | .721            | -0.23 (-0.70; 0.24)                             | .331 | 3.11 (0.99; 5.23)                                   | <b>.004</b> |
| <b>Duration of T1DM</b>                                         | 1.01 (0.89; 1.15)                                            | .850 | -0.01 (-0.14; 0.12)                                    | .922        | 0.97 (0.81; 1.18)                                            | .806 | -0.05 (-0.24; 0.14)                                    | .587        | -0.74 (-1.29; -0.19)            | <b>.008</b> | -0.32 (-0.99; 0.35) | .348 | -1.05 (-1.86; -0.24) | <b>.011</b> | 0.01 (-0.08; 0.09)              | .851            | -0.003 (-0.06; 0.05)                             | .915            | -0.005 (-0.07; 0.06)                            | .870 | 0.05 (-0.18; 0.29)                                  | .650        |
| <b>Presence of comorbidities</b>                                | 0.81 (0.33; 1.98)                                            | .641 | 0.26 (-0.60; 1.12)                                     | .556        | 0.81 (0.26; 2.50)                                            | .710 | 0.27 (-0.83; 1.38)                                     | .624        | 0.87 (-2.91; 4.64)              | .652        | 2.42 (-1.78; 6.63)  | .259 | -1.04 (-6.98; 4.89)  | .731        | 0.02 (-0.52; 0.57)              | .930            | -0.005 (-0.43; 0.42)                             | .980            | 0.02 (-0.36; 0.41)                              | .91  | -0.52 (-2.15; 1.11)                                 | .534        |
| <b>Age group: ≥12 years (ref: &lt;12 years)</b>                 | 0.56 (0.22; 1.42)                                            | .221 | -0.15 (-1.04; 0.75)                                    | .745        | 1.32 (0.39; 4.44)                                            | .651 | 0.32 (-0.87; 1.50)                                     | .599        | -3.11 (-6.99; 0.78)             | .117        | -3.84 (-8.61; 0.94) | .115 | -2.82 (-8.49; 2.83)  | .327        | -0.09 (-0.67; 0.48)             | .705            | -0.05 (0.48; 0.38)                               | .819            | -0.002 (-0.38; 0.37)                            | .99  | -0.02 (-3.24; 0.76)                                 | .980        |
| <b>Baseline HbA1c group: ≥7.5% (ref: HbA1c &lt;7.5%)</b>        | 0.41 (0.15; 1.17)                                            | .097 | -0.57 (-1.40; 0.26)                                    | .176        | 2.17 (0.53; 8.88)                                            | .280 | 1.54 (0.31; 2.77)                                      | <b>.014</b> | -1.93 (-5.98; 2.11)             | .349        |                     |      |                      |             | -1.27 (-1.89; -0.65)            | <b>&lt;.001</b> | 1.06 (0.60; 1.52)                                | <b>&lt;.001</b> | -0.12 (-0.57; 0.33)                             | .593 | -1.24 (-1.34; 4.22)                                 | .225        |
| <b>Time*Baseline HbA1c Group (ref: M0 &amp; HbA1c &lt;7.5%)</b> |                                                              |      |                                                        |             |                                                              |      |                                                        |             |                                 |             |                     |      |                      |             |                                 |                 |                                                  |                 |                                                 |      |                                                     |             |
| M12 & HbA1c ≥7.5%                                               | 2.69                                                         | .108 | 0.30                                                   | .117        | 2.01                                                         | .437 | -0.44                                                  | .333        | -4.61                           | <b>.061</b> |                     |      |                      |             | -0.06                           | .892            | -0.11                                            | .703            | 0.16                                            | .615 | 1.44                                                | .310        |

|                  |                         |      |                           |      |                          |                 |                            |                 |                            |                 |                            |                 |                            |                 |                            |                 |                         |                 |                         |                 |                            |                 |
|------------------|-------------------------|------|---------------------------|------|--------------------------|-----------------|----------------------------|-----------------|----------------------------|-----------------|----------------------------|-----------------|----------------------------|-----------------|----------------------------|-----------------|-------------------------|-----------------|-------------------------|-----------------|----------------------------|-----------------|
|                  | (0.81;<br>8.96)         |      | (-0.08;<br>0.68)          |      | (0.34;<br>11.68)         |                 | (-1.33;<br>0.45)           |                 | (-9.44;<br>0.21)           |                 |                            |                 |                            |                 | (-0.90;<br>0.78)           |                 | (-0.70;<br>0.48)        |                 | (-0.46;<br>0.78)        |                 | (-1.34;<br>4.22)           |                 |
| <b>Intercept</b> | 0.78<br>(0.27;<br>2.23) | .641 | -0.78<br>(-1.74;<br>0.17) | .107 | 0.03<br>(0.004;<br>0.19) | <b>&lt;.001</b> | -4.32<br>(-5.97;<br>-2.67) | <b>&lt;.001</b> | 90.50<br>(86.13;<br>94.87) | <b>&lt;.001</b> | 90.44<br>(85.92;<br>94.96) | <b>&lt;.001</b> | 88.92<br>(83.96;<br>93.88) | <b>&lt;.001</b> | 12.43<br>(11.78;<br>13.07) | <b>&lt;.001</b> | 2.98<br>(2.49;<br>3.46) | <b>&lt;.001</b> | 2.29<br>(1.84;<br>2.74) | <b>&lt;.001</b> | 26.80<br>(24.80;<br>28.81) | <b>&lt;.001</b> |

CI = Confidence Interval; HbA1c = Glycosylated Haemoglobin; M = Months; OR = Odds Ratio; ref = reference.

**Table 2. Multivariate Mixed Regression Model for Adherence**

| Variable                                                        | Sensor usage time, %     |             | Number of scans per day |                 | Number of sensors used |                 |                           |                 |                           |                 |
|-----------------------------------------------------------------|--------------------------|-------------|-------------------------|-----------------|------------------------|-----------------|---------------------------|-----------------|---------------------------|-----------------|
|                                                                 | Total sample (n=156)     |             | Total sample (n=156)    |                 | Total sample (n=156)   |                 | HbA1c basal < 7.5% (n=68) |                 | HbA1c basal ≥ 7.5% (n=88) |                 |
|                                                                 | B (95%CI)                | P           | B (95%CI)               | P               | B (95%CI)              | P               | B (95%CI)                 | P               | B (95%CI)                 | P               |
| <b>Time</b>                                                     |                          |             |                         |                 |                        |                 |                           |                 |                           |                 |
| M6 (ref: M3)                                                    | 1.82<br>(-3.31; 6.98)    | .487        | -0.25<br>(-1.41; 0.92)  | .678            | 0.49<br>(-0.58; 1.56)  | .367            | 0.51<br>(-0.37; 1.39)     | .255            | 1.59<br>(0.48; 2.70)      | <b>.005</b>     |
| M12 (ref: M3)                                                   | 6.42<br>(1.12; 11.72)    | <b>.018</b> | 0.30<br>(-0.91; 1.51)   | .625            | 6.96<br>(5.85; 8.06)   | <b>&lt;.001</b> | 6.97<br>(6.06; 7.87)      | <b>&lt;.001</b> | 9.37<br>(8.25; 10.50)     | <b>&lt;.001</b> |
| <b>Duration of T1DM</b>                                         | -1.02<br>(-1.77; -0.27)  | <b>.008</b> | -0.08<br>(-0.29; 0.13)  | .468            | -0.06<br>(-0.20; 0.07) | .363            | -0.11<br>(-0.25; 0.04)    | .152            | -0.03<br>(-0.24; 0.18)    | .804            |
| <b>Presence of comorbidities</b>                                | 0.53<br>(-4.61; 5.66)    | .840        | -0.69<br>(-2.14; 0.75)  | .348            | -0.35<br>(-1.27; 0.56) | .453            | -0.25<br>(-1.16; 0.66)    | .585            | -0.39<br>(-1.92; 1.14)    | .617            |
| <b>Age group: ≥12 years (ref: &lt;12 years)</b>                 | -7.93<br>(-13.19; -2.66) | <b>.003</b> | -3.92<br>(-5.40; -2.43) | <b>&lt;.001</b> | 0.39<br>(-0.55; 1.33)  | .417            | 0.03<br>(-0.98; 1.05)     | .952            | 0.69<br>(-0.77; 2.14)     | .354            |
| <b>Baseline HbA1c group: ≥7.5% (ref: HbA1c &lt;7.5%)</b>        | -4.59<br>(-10.71; 1.53)  | .142        | -1.92<br>(-3.52; -0.31) | <b>.019</b>     | 0.12<br>(-1.04; 1.29)  | .836            |                           |                 |                           |                 |
| <b>Time*Baseline HbA1c Group (ref: M3 &amp; HbA1c &lt;7.5%)</b> |                          |             |                         |                 |                        |                 |                           |                 |                           |                 |
| M6 & HbA1c ≥7.5%                                                | 0.38<br>(-6.58; 7.33)    | .915        | 0.43<br>(-1.14; 2.01)   | .590            | 1.09<br>(-0.36; 2.54)  | .141            |                           |                 |                           |                 |
| M12 & HbA1c ≥7.5%                                               | -1.35<br>(-8.48; 5.77)   | .710        | 0.35<br>(-1.28; 1.97)   | .676            | 2.41<br>(0.93; 3.90)   | <b>.001</b>     |                           |                 |                           |                 |

1  
2  
3  
4  
5  
6  
7  
8  
9  
10  
11  
12  
13  
14  
15  
16  
17  
18  
19  
20  
21  
22  
23  
24  
25  
26  
27  
28  
29  
30  
31  
32  
33  
34  
35  
36  
37  
38  
39  
40  
41  
42  
43  
44  
45  
46

|                                                                                          |                       |                 |                        |                 |                      |                 |                      |                 |                      |                 |
|------------------------------------------------------------------------------------------|-----------------------|-----------------|------------------------|-----------------|----------------------|-----------------|----------------------|-----------------|----------------------|-----------------|
| <b>Intercept</b>                                                                         | 89.10<br>(82.9; 95.3) | <b>&lt;.001</b> | 13.0<br>(11.32; 14.68) | <b>&lt;.001</b> | 6.19<br>(5.04; 7.33) | <b>&lt;.001</b> | 6.39<br>(5.34; 7.44) | <b>&lt;.001</b> | 6.13<br>(4.77; 7.49) | <b>&lt;.001</b> |
| CI = Confidence Interval; HbA1c = Glycosylated Haemoglobin; M = Months; ref = reference. |                       |                 |                        |                 |                      |                 |                      |                 |                      |                 |

For peer review only

STROBE Statement—Checklist of items that should be included in reports of *cohort studies*

|                              | Item No | Recommendation                                                                                                                                                                                                                                                                                                         | Page No                        |
|------------------------------|---------|------------------------------------------------------------------------------------------------------------------------------------------------------------------------------------------------------------------------------------------------------------------------------------------------------------------------|--------------------------------|
| <b>Title and abstract</b>    | 1       | (a) Indicate the study's design with a commonly used term in the title or the abstract<br>(b) Provide in the abstract an informative and balanced summary of what was done and what was found                                                                                                                          | 1<br>1                         |
| <b>Introduction</b>          |         |                                                                                                                                                                                                                                                                                                                        |                                |
| Background/rationale         | 2       | Explain the scientific background and rationale for the investigation being reported                                                                                                                                                                                                                                   | 3                              |
| Objectives                   | 3       | State specific objectives, including any prespecified hypotheses                                                                                                                                                                                                                                                       | 3                              |
| <b>Methods</b>               |         |                                                                                                                                                                                                                                                                                                                        |                                |
| Study design                 | 4       | Present key elements of study design early in the paper                                                                                                                                                                                                                                                                | 4                              |
| Setting                      | 5       | Describe the setting, locations, and relevant dates, including periods of recruitment, exposure, follow-up, and data collection                                                                                                                                                                                        | 4                              |
| Participants                 | 6       | (a) Give the eligibility criteria, and the sources and methods of selection of participants. Describe methods of follow-up<br>(b) For matched studies, give matching criteria and number of exposed and unexposed                                                                                                      | 4                              |
| Variables                    | 7       | Clearly define all outcomes, exposures, predictors, potential confounders, and effect modifiers. Give diagnostic criteria, if applicable                                                                                                                                                                               | 4-5                            |
| Data sources/<br>measurement | 8*      | For each variable of interest, give sources of data and details of methods of assessment (measurement). Describe comparability of assessment methods if there is more than one group                                                                                                                                   | 5                              |
| Bias                         | 9       | Describe any efforts to address potential sources of bias                                                                                                                                                                                                                                                              | 5                              |
| Study size                   | 10      | Explain how the study size was arrived at                                                                                                                                                                                                                                                                              | 5                              |
| Quantitative variables       | 11      | Explain how quantitative variables were handled in the analyses. If applicable, describe which groupings were chosen and why                                                                                                                                                                                           |                                |
| Statistical methods          | 12      | (a) Describe all statistical methods, including those used to control for confounding<br>(b) Describe any methods used to examine subgroups and interactions<br>(c) Explain how missing data were addressed<br>(d) If applicable, explain how loss to follow-up was addressed<br>(e) Describe any sensitivity analyses | 5-6<br>5-6<br>5-6<br>5-6<br>NA |
| <b>Results</b>               |         |                                                                                                                                                                                                                                                                                                                        |                                |
| Participants                 | 13*     | (a) Report numbers of individuals at each stage of study—eg numbers potentially eligible, examined for eligibility, confirmed eligible, included in the study, completing follow-up, and analysed<br>(b) Give reasons for non-participation at each stage<br>(c) Consider use of a flow diagram                        | 7<br>7<br>7                    |
| Descriptive data             | 14*     | (a) Give characteristics of study participants (eg demographic, clinical, social) and information on exposures and potential confounders<br>(b) Indicate number of participants with missing data for each variable of interest<br>(c) Summarise follow-up time (eg, average and total amount)                         | 7<br>Apex 1<br>7               |
| Outcome data                 | 15*     | Report numbers of outcome events or summary measures over time                                                                                                                                                                                                                                                         | 8                              |

|    |                          |    |                                                                                                                                                                                                              |       |
|----|--------------------------|----|--------------------------------------------------------------------------------------------------------------------------------------------------------------------------------------------------------------|-------|
| 1  | Main results             | 16 | (a) Give unadjusted estimates and, if applicable, confounder-adjusted estimates and their precision (eg, 95% confidence interval). Make clear which confounders were adjusted for and why they were included | 8     |
| 2  |                          |    | (b) Report category boundaries when continuous variables were categorized                                                                                                                                    | 8     |
| 3  |                          |    | (c) If relevant, consider translating estimates of relative risk into absolute risk for a meaningful time period                                                                                             | NA    |
| 4  | Other analyses           | 17 | Report other analyses done—eg analyses of subgroups and interactions, and sensitivity analyses                                                                                                               | 9     |
| 5  | <b>Discussion</b>        |    |                                                                                                                                                                                                              |       |
| 6  | Key results              | 18 | Summarise key results with reference to study objectives                                                                                                                                                     | 10-11 |
| 7  | Limitations              | 19 | Discuss limitations of the study, taking into account sources of potential bias or imprecision. Discuss both direction and magnitude of any potential bias                                                   | 10-11 |
| 8  | Interpretation           | 20 | Give a cautious overall interpretation of results considering objectives, limitations, multiplicity of analyses, results from similar studies, and other relevant evidence                                   | 10-11 |
| 9  | Generalisability         | 21 | Discuss the generalisability (external validity) of the study results                                                                                                                                        | 10-11 |
| 10 | <b>Other information</b> |    |                                                                                                                                                                                                              |       |
| 11 | Funding                  | 22 | Give the source of funding and the role of the funders for the present study and, if applicable, for the original study on which the present article is based                                                | 15    |

\*Give information separately for exposed and unexposed groups.

**Note:** An Explanation and Elaboration article discusses each checklist item and gives methodological background and published examples of transparent reporting. The STROBE checklist is best used in conjunction with this article (freely available on the Web sites of PLoS Medicine at <http://www.plosmedicine.org/>, Annals of Internal Medicine at <http://www.annals.org/>, and Epidemiology at <http://www.epidem.com/>). Information on the STROBE Initiative is available at <http://www.strobe-statement.org>.

# BMJ Open

## Effectiveness, safety and costs of the FreeStyle Libre glucose monitoring system for children and adolescents with type 1 diabetes in Spain: a prospective, uncontrolled, pre-post study

|                                 |                                                                                                                                                                                                                                                                                                                                                                                                                                                                                                                                                                                                                                                                                                                                                                                                                                                                                                                                                                                                                      |
|---------------------------------|----------------------------------------------------------------------------------------------------------------------------------------------------------------------------------------------------------------------------------------------------------------------------------------------------------------------------------------------------------------------------------------------------------------------------------------------------------------------------------------------------------------------------------------------------------------------------------------------------------------------------------------------------------------------------------------------------------------------------------------------------------------------------------------------------------------------------------------------------------------------------------------------------------------------------------------------------------------------------------------------------------------------|
| Journal:                        | <i>BMJ Open</i>                                                                                                                                                                                                                                                                                                                                                                                                                                                                                                                                                                                                                                                                                                                                                                                                                                                                                                                                                                                                      |
| Manuscript ID                   | bmjopen-2022-071334.R3                                                                                                                                                                                                                                                                                                                                                                                                                                                                                                                                                                                                                                                                                                                                                                                                                                                                                                                                                                                               |
| Article Type:                   | Original research                                                                                                                                                                                                                                                                                                                                                                                                                                                                                                                                                                                                                                                                                                                                                                                                                                                                                                                                                                                                    |
| Date Submitted by the Author:   | 08-Nov-2023                                                                                                                                                                                                                                                                                                                                                                                                                                                                                                                                                                                                                                                                                                                                                                                                                                                                                                                                                                                                          |
| Complete List of Authors:       | González-Pacheco, Himar; Fundacion Canaria Instituto de Investigacion Sanitaria de Canarias<br>Rivero-Santana, Amado ; Fundacion Canaria Instituto de Investigacion Sanitaria de Canarias<br>Ramallo Farina, Yolanda; Fundación Canaria Instituto de Investigación Sanitaria de Canarias<br>Valcárcel-Nazco, Cristina; Fundacion Canaria Instituto de Investigacion Sanitaria de Canarias<br>Álvarez-Pérez, Yolanda; Fundacion Canaria Instituto de Investigacion Sanitaria de Canarias<br>García-Pérez, Lidia; Fundacion Canaria Instituto de Investigacion Sanitaria de Canarias, Servicio de Evaluación del Servicio Canario de la Salud (SESCS)<br>García-Bello, Miguel Angel; Fundacion Canaria Instituto de Investigacion Sanitaria de Canarias<br>Perestelo-Pérez, Lilisbeth; Servicio de Evaluación y Planificación del Servicio Canario de la Salud<br>Serrano-Aguilar, Pedro; Servicio de Evaluación y Planificación del Servicio Canario de la Salud<br>Group, Health Professional; Hospital Severo Ochoa |
| <b>Primary Subject Heading</b>: | Diabetes and endocrinology                                                                                                                                                                                                                                                                                                                                                                                                                                                                                                                                                                                                                                                                                                                                                                                                                                                                                                                                                                                           |
| Secondary Subject Heading:      | Diabetes and endocrinology, Public health                                                                                                                                                                                                                                                                                                                                                                                                                                                                                                                                                                                                                                                                                                                                                                                                                                                                                                                                                                            |
| Keywords:                       | Paediatric endocrinology < DIABETES & ENDOCRINOLOGY, PUBLIC HEALTH, Health economics < HEALTH SERVICES ADMINISTRATION & MANAGEMENT                                                                                                                                                                                                                                                                                                                                                                                                                                                                                                                                                                                                                                                                                                                                                                                                                                                                                   |
|                                 |                                                                                                                                                                                                                                                                                                                                                                                                                                                                                                                                                                                                                                                                                                                                                                                                                                                                                                                                                                                                                      |

SCHOLARONE™  
Manuscripts





I, the Submitting Author has the right to grant and does grant on behalf of all authors of the Work (as defined in the below author licence), an exclusive licence and/or a non-exclusive licence for contributions from authors who are: i) UK Crown employees; ii) where BMJ has agreed a CC-BY licence shall apply, and/or iii) in accordance with the terms applicable for US Federal Government officers or employees acting as part of their official duties; on a worldwide, perpetual, irrevocable, royalty-free basis to BMJ Publishing Group Ltd ("BMJ") its licensees and where the relevant Journal is co-owned by BMJ to the co-owners of the Journal, to publish the Work in this journal and any other BMJ products and to exploit all rights, as set out in our [licence](#).

The Submitting Author accepts and understands that any supply made under these terms is made by BMJ to the Submitting Author unless you are acting as an employee on behalf of your employer or a postgraduate student of an affiliated institution which is paying any applicable article publishing charge ("APC") for Open Access articles. Where the Submitting Author wishes to make the Work available on an Open Access basis (and intends to pay the relevant APC), the terms of reuse of such Open Access shall be governed by a Creative Commons licence – details of these licences and which [Creative Commons](#) licence will apply to this Work are set out in our licence referred to above.

Other than as permitted in any relevant BMJ Author's Self Archiving Policies, I confirm this Work has not been accepted for publication elsewhere, is not being considered for publication elsewhere and does not duplicate material already published. I confirm all authors consent to publication of this Work and authorise the granting of this licence.

1  
2  
3  
4 **Effectiveness, safety and costs of the FreeStyle Libre glucose monitoring system for children and adolescents**  
5 **with type 1 diabetes in Spain: a prospective, uncontrolled, pre-post study**  
6

7 Himar González-Pacheco<sup>1,2,3,4</sup>, Amado Rivero-Santana<sup>1,2,3,4</sup>, Yolanda Ramallo-Fariña<sup>1,2,3,4</sup>, Cristina Valcárcel-  
8 Nazco<sup>1,2,3,4</sup>, Yolanda Álvarez-Pérez<sup>1,2,3,4</sup>, Lidia García-Pérez<sup>1,2,3,4</sup>, Miguel Ángel García-Bello<sup>1,2,3,4</sup>, Lilisbeth  
9 Perestelo-Pérez<sup>1,2,3,4,5</sup>, Pedro Serrano-Aguilar<sup>1,2,3,4,5</sup>, Health Professional Group.

- 11 1. Canary Islands Health Research Institute Foundation (FIISC), Tenerife, Spain  
12 2. Spanish Network of Agencies for Assessing National Health System Technologies and Performance (RedETS),  
13 Spain  
14 3. Network for Research on Chronicity, Primary Care, and Health Promotion (RICAPPS), Tenerife, Spain  
15 4. Institute of Biomedical Technologies (ITB), Tenerife, Spain  
16 5. Evaluation Unit (SESCS), Canary Islands Health Services (SCS), Tenerife, Spain

17  
18  
19 **Correspondence to:**

20 Himar González Pacheco  
21 [himar.gonzalezpacheco@sescs.es](mailto:himar.gonzalezpacheco@sescs.es)  
22

23  
24 **Abstract**

25  
26 **Objectives**

27 To evaluate the effectiveness, safety and costs of FreeStyle Libre (FSL) glucose monitoring system for children  
28 and adolescents with type 1 diabetes mellitus (T1DM) in Spain.  
29

30  
31 **Design**

32 Prospective, multicentre pre-post study.

33  
34 **Setting**

35 Thirteen Spanish public hospitals recruited patients from January 2019 to March 2020, with a 12-month follow-  
36 up.  
37

38  
39 **Participants**

40 156 patients were included.

41  
42 **Primary and secondary outcome measures**

43 Primary: HbA1c change. Secondary: severe hypoglycaemic events (self-reported and clinical records), quality of  
44 life, diabetes treatment knowledge, treatment satisfaction, adverse events, adherence, sensor usage time and  
45 scans. Healthcare resource utilization was assessed for cost analysis from the National Health System (NHS)  
46 perspective, incorporating direct healthcare costs. Data analysis utilized mixed regression models with repeated  
47 measures. The intervention's total cost was estimated by multiplying health resource usage with unit costs.  
48

49  
50 **Results**

51 In the whole sample, HbA1c increased significantly (0.32%; 95%CI: 0.10, 0.55). In the subgroup with baseline HbA1c  
52  $\geq 7.5\%$  (n=88), there was a significant reduction at 3 (-0.46%; -0.69, -0.23), 6 (-0.49%; -0.73, -0.25), and 12 months  
53 (-0.43%; -0.68, -0.19). Well-controlled patients had a significant 12-month worsening (0.32%; 0.18, 0.47). Self-  
54 reported severe hypoglycaemia significantly decreased compared to the previous year for the whole sample (-  
55 0.37; -0.62, -0.11). Quality of life and diabetes treatment knowledge showed no significant differences, but  
56 satisfaction increased. Adolescents had lower sensor usage time and scans than children. Reduction in HbA1c  
57 was significantly associated with device adherence. No serious adverse effects were observed. Data suggest that  
58 use of FSL could reduce healthcare resource use (strips and lancets) and costs related to productivity loss.  
59  
60

## Conclusions

The use of FSL in young patients with T1DM was associated with a significant reduction in severe hypoglycaemia, and improved HbA1c levels were seen in patients with poor baseline control. Findings suggest cost savings and productivity gains for caregivers. Causal evidence is limited due to the study design. Further research is needed to confirm results and assess risks, especially for patients with lower baseline HbA1c.

## Strengths and limitations of this study

- This study provides nationally contextualised real-world scientific evidence on the effectiveness, safety and costs of the flash glucose monitoring systems (FreeStyle Libre [FSL]) indicated for type 1 diabetes in childhood and adolescence in Spain.
- The study utilized a combination of self-reported outcomes, clinical data extracted from electronic health records, and device-stored information from the FSL devices, which provides a robust and multifaceted assessment of the outcomes.
- The uncontrolled design of the study precludes causal inferences and results from randomized trials are needed to draw definitive conclusions.
- The small sample size limits the generalizability and statistical power of the findings.
- The cost estimation analysis only considered direct healthcare costs from the Spanish National Health System perspective, and indirect costs were not fully taken into account, which may underestimate the overall economic impact of the intervention.

## Keywords

Continuous glucose monitoring, HbA1c, Type 1 diabetes, costs, Spain.

**Word count** 4866

## INTRODUCTION

Type 1 diabetes mellitus (T1DM) requires continuous medical monitoring, to reduce the development of vascular complications [1,2]. The early onset and chronic character of this condition increase the likelihood of reducing health-related quality of life (HRQoL) and health expectancy among young T1DM people [3]. A total of 586,000 children aged under 15 years suffer from T1DM globally [4]. In Spain, the incidence is 11.5-27.6/100,000[5], which represents a high cost to society [6].

To reduce the risk of short (metabolic) and long-term (vascular) diabetes complications, frequent determination of blood glucose levels is required. Continuous glucose monitoring systems, such as the flash glucose monitoring (FGM) systems, contribute to glycaemia monitoring, as well as to reduce the daily number of fingersticks [7], providing dynamic information to the users about their glucose level. FreeStyle Libre (FSL), developed and marketed in Spain by Abbott Laboratories, has been indicated to measure glucose levels in the interstitial fluid in people aged over four years with T1DM. No serious adverse effects related to the use of these devices have been reported. Mild effects consist of skin problems in the area where the sensor is inserted, similar to other FGM [8,9].

In randomized trials, the FSL system has been shown to significantly reduce HbA1c levels and the frequency of hypoglycaemia in patients with T2DM, compared to the conventional finger-pricking method [10]. In T1DM, most published studies had an uncontrolled design, and meta-analyses have revealed that the use of FSL is associated with significant HbA1c reductions from baseline to the last follow up [11,12]. Approximately 30% of these studies included children and adolescents, which also led to obtaining significant pre-post HbA1c reductions. To the best of our knowledge, only one randomized trial has evaluated the FSL versus conventional glucose measurement in non-adults (13-20 years-old) with T1DM [13], showing no significant results on HbA1c or quality of life [13].

Spain has a universal public health system, financed by taxes. The system is highly decentralized and the 17 Spanish administrative regions have their own health policy budget, which enables a tailored approach to meet the specific needs and demands of each region. The competences and portfolio of the Spanish Ministry of Health encompass a wide range of responsibilities aimed at ensuring the well-being and health of the population. These include policy development, regulation and oversight of healthcare services, public health initiatives, pharmaceutical regulation, health technology assessment and coordination of emergency responses, among others. The Spanish Network of Health Technology Assessment Agencies of the National Health System (RedETS) [14], published a report in 2016 [15], later updated in 2017 [16], devised by the Canary Islands Health Service Evaluation Department (SESCS) [17], about the effectiveness, safety and cost-effectiveness of FSL in patients with T1DM and T2DM. In 2019, the Spanish Ministry of Health decided to fund FSL for adult T1DM patients [18], and in 2020 the reimbursement was extended to any insulin-dependent patient not diagnosed with T1DM or T2DM [19].

Regarding children and adolescents with T1DM, the Spanish Ministry of Health decided to perform a post-launch evidence generation study to provide real world information in the Spanish context on the effectiveness, safety, acceptability and potential use barriers, as well as on healthcare resources use and costs, to inform health policy decision-making on a national level in regard to coverage and public funding in these population groups [20,21]. This paper reports its results.

## METHODS

### Study design

Prospective, multicentre, pre-post study performed in 13 public hospitals throughout Spain (see **online supplemental Appendix 1**). Patients were recruited between January 2019 and March 2020, with a 12-month follow-up.

### Interventions

FSL consists of: 1) an arm sensor that measures and stores interstitial glucose levels, wearable for 14 days [22]; 2) a reader that obtains glucose readings from the sensor when placed at a distance between 1-4 cm, storing up to 90 days of glucose measures and user-entered notes. The Libre View<sup>®</sup> software and the FreeStyle Libre Link<sup>®</sup>, and LibreLinkUp<sup>®</sup> Apps enables obtaining reports with the daily patterns of glucose levels.

### Participants

Patients were eligible for inclusion if they were aged between 4 and 17, had been diagnosed with T1DM for at least one year prior to the study, were receiving intensive insulin therapy, required more than six fingersticks per day, and provided their informed consent to participate.

We excluded patients who had hypoglycaemia unawareness (judged by the clinician), were currently undergoing systemic corticosteroid treatment for more than two weeks within the last three months, had previously used or were currently using a FGM device within the last 12 months, were pregnant adolescents, had allergies to device adhesives, were unwilling to participate, lacked the necessary skills to effectively use the technology (patient/caregiver) or failed to provide informed consent.

### Setting, logistics and recruitment

The study protocol was devised by SESCO researchers with the assistance of clinical experts from all hospitals taking part, patient association and industry representatives. A centralized information system (SIEM) was developed on the Spanish Ministry of Health's intranet, accessible both for the clinical researchers responsible for recruitment, clinical examination and data collection, as well as SESCO researchers.

Clinical researchers from hospitals taking part were responsible for recruiting, informing and training both patients and caregivers. They collected self-reported data using various measurement scales and extracted clinical information from the electronic health record (EHR) at baseline, 3, 6, and 12 months. In addition, they retrieved the stored information from the FSL device during the follow-up phase (3, 6, and 12 months) on the SIEM platform. SESCO researchers were responsible for coordinating the project and supervising data collection, monitoring quality assurance and data validation, analyses and reporting.

Interested Spanish autonomous communities designated the hospitals they wished to take part in the study. Thirteen public hospitals were included between January 2019 and May 2020, distributed over eight Spanish autonomous communities.

### Endpoints

#### *Effectiveness*

The primary endpoint was the change in HbA1c level from baseline to follow up. Secondary endpoints included: 1) data extracted from the EHR at baseline and 3, 6 and 12 months: number of severe hypoglycaemia events (defined as those that require help from another person), ketoacidosis episodes, number of hospital admissions and mortality; and 2) self-reported outcomes evaluated at baseline and at 12 months follow-up, by means of the EQ-5D-Y questionnaire [23]; with five categories, reporting the level of severity, ranging from 1 ("I have no problems") to 5 ("I have a lot of problems") in terms of mobility, self-care, activities of daily living, pain/discomfort and anxiety/depression. Furthermore, a visual analogue scale (VAS) measured self-perceived general health, ranging from "0" (worst health status) to "100" (best health status).

1  
2  
3  
4 Knowledge of diabetes treatment was measured by means of a modified version of the questionnaire devised by  
5 Mitchell et al. [24]. This includes 14 items evaluating basic theoretical knowledge about the management of  
6 T1DM and its treatment, as well as the patient/caregiver's self-perceived involvement in self-care. The final score  
7 is the sum of correct answers (range 0-14). To measure satisfaction with treatment, we used the six-item  
8 Diabetes Treatment Satisfaction Questionnaire (DTSQ) [25]. Response options range from 0 (very dissatisfied) to  
9 6 (very satisfied) (range 0-36). Another two items measured the perceived frequency of hyperglycaemia and  
10 hypoglycaemia on a scale from 0 (never perceived) to 6 (most of the time).  
11  
12

### 13 **Safety**

14 Patients' self-reported device-related adverse events were collected at 3, 6 and 12-months of follow-up.  
15  
16

### 17 **Adherence**

18 To measure device adherence, the following variables were evaluated: 1) Number of daily scans; 2) Sensor usage  
19 time (percentage); and 3) Number of sensors used. These data were collected throughout the follow-up phase  
20 by means of the information stored in the device.  
21  
22

### 23 **Use of healthcare resources**

24 Data were extracted from the EHR at baseline and at 12-months of follow-up on: 1) Number of hospitalizations;  
25 2) Number of clinic visits (endocrinology, nursing, primary care/paediatrics, emergency); 3) Number of HbA1c  
26 assays; 4) Number of test strips and lancets used; and 5) Absenteeism from work (number of days the caregiver  
27 was absent from work due to problems related to the child's T1DM).  
28

29 In addition to these measures, information on age, sex, body mass index (BMI), time since diagnosis, presence  
30 of comorbidities and pubertal stage according to the Tanner scale [26], which classifies patients into 5 stages  
31 ranging from stage 1 (childhood) to 5 (adult), was systematically collected.  
32  
33

### 34 **Sample size calculation**

35 We estimated a sample size requirement of 43 participants to detect a minimal clinically relevant change in  
36 HbA1c of 0.5% [27], assuming 95% confidence level, 80% power, a HbA1c standard deviation of 1, a pre-post  
37 correlation of 0.5 (conservative assumption), and a loss rate of 20%. In addition to the main effect in the whole  
38 sample, we were also interested in the effect of the intervention on subgroups defined by their baseline HbA1c  
39 level (greater or less than 7.5%), and age (<12 vs. ≥12 years-old). However, the analysis of interactions requires  
40 larger sample sizes to attain statistical power, which was not feasible within the study's time limits. Therefore,  
41 we aimed to multiply the sample at least by 4 (n=172) to increase the statistical power as much as possible.  
42  
43

### 44 **Statistical analysis**

45 Means and standard deviation (SD) were estimated for continuous variables, and count and percentage for  
46 qualitative variables. Baseline characteristics of patients were compared using student-*t*, Pearson chi-square,  
47 Fisher's exact test or Cochran Q, according to the type of variables.  
48

49 Mixed regression models with repeated measures were used, adjusting for the interaction between time and  
50 baseline HbA1c (dichotomous variable) and age group, time and its main effects. The duration of the disease and  
51 the existence of comorbidities were included as covariates. A linear link function was used for continuous  
52 dependent variables, a logistic function for dichotomous dependent variables and a Poisson function for count  
53 dependent variables. In the models with significant interaction, mixed regression models were performed for  
54 each interaction subgroup.  
55

56 The relationship between adherence to the device and HbA1c reduction was analysed using two mixed linear  
57 regression models, whose independent variables were the percentage of time using the sensor (12 months) and  
58  
59  
60

1  
2  
3  
4 the number of monthly scans; basal HbA1c level was introduced as a covariable. Intercept was introduced as a  
5 random effect in all models.

6 For missing values during follow-up, a comparability analysis was conducted between participants lost to follow-  
7 up and those who remained, prior to performing multiple imputation by chained equations using Stata version  
8 15.0. The details of this comparability analysis and the imputation model can be found in **online supplemental**  
9 **Appendix 2**.

10 A level of 0.05 was considered statistically significant. Analyses were performed with the statistical software  
11 Stata V.15.0 [28] and SPSS V.20.0 [29].  
12  
13

#### 14 **Cost estimation**

15 Intervention costs were estimated from the Spanish National Health System (NHS) perspective, including only  
16 direct healthcare costs during the 12 months of the study. The healthcare resources collected in this study,  
17 together with the corresponding unit costs and their information sources, can be found in **Table A1 in online**  
18 **supplemental Appendix 3**. Costs were expressed as 2021 euros (€). When necessary, we adjusted for the  
19 consumer price index (CPI), using the Spanish Office of National Statistics (INE) – the INE's income conversion  
20 tool [30].  
21

22 Unit cost of test strips and lancets were estimated with the average costs of information provided by different  
23 regional health services of the Spanish NHS. Total costs were estimated multiplying the collected data on health  
24 resources used by their respective unit costs, and then added.

25 Descriptive statistics are presented for total costs aggregated and broken down into: primary care visits (nursing  
26 and physicians), emergency visits (hospital and non-hospitals), specialist physicians visits, laboratory tests (HbA1c  
27 assay) and monitoring instruments (FSL sensor and test strips and lancets).

28 Given the nature of the costs and their non-normal nature, confidence intervals were estimated using a non-  
29 parametric bootstrapping method [31]. Analyses were performed using the statistical software SPSS V.20.0 [29]  
30 with the help of Microsoft Excel.

31 In addition, although the social perspective was not taken into account in this estimate, indirect technology costs  
32 were reported using the human capital theory, i.e. considering the costs attributed to productivity losses of the  
33 parents or caregivers of the child with T1DM before and after one year of using the FSL.

34 To estimate the cost per day of absenteeism, the cost per hour worked in Spain published by the Statistical Office  
35 of the European Union (Eurostat) [32] was multiplied by the average number of daily working hours worked in  
36 Spain published in the INE's Labour Force Survey (LFS) [33].  
37  
38  
39

#### 40 **Patient and public involvement**

41 There was no patient involvement in the design of this study. Clinical experts from all participant hospitals,  
42 representatives of patient associations and the industry took part in drawing up the protocol. We undertook with  
43 healthcare professionals to share the results with them in an easy-to-understand way.  
44  
45  
46  
47  
48  
49  
50  
51  
52  
53  
54  
55  
56  
57  
58  
59  
60

## RESULTS

A total of 165 patients were initially registered for the study. However, nine patients were subsequently excluded as they did not meet the study's inclusion criteria (**Figure 1**). Therefore, the final analysis included a total of 156 patients.

Patient baseline characteristics are shown in **Table 1** according to subgroups by level of metabolic control and age. There was a higher percentage of participants in stage 1 and 5 in the subgroup with worse glycaemic control ( $P=0.02$ ). In this subgroup, the mean HbA1c value was 8.7%; with 6.8% ( $P<0.001$ ) in the well-controlled group. Descriptive statistics obtained at each time point for the total sample and subgroups for each outcome measure can be found in **online supplemental Appendix 4**.

| Table 1. Baseline characteristics of patients according to baseline HbA1c and age groups                                                                                                                                                                                                                                                                                                                                    |                  |                       |                        |             |                     |                      |                 |
|-----------------------------------------------------------------------------------------------------------------------------------------------------------------------------------------------------------------------------------------------------------------------------------------------------------------------------------------------------------------------------------------------------------------------------|------------------|-----------------------|------------------------|-------------|---------------------|----------------------|-----------------|
|                                                                                                                                                                                                                                                                                                                                                                                                                             | Total<br>(n=156) | HbA1c <7.5%<br>(n=68) | HbA1c ≥7.5 %<br>(n=88) | P           | <12 years<br>(n=53) | ≥12 years<br>(n=103) | P               |
| <b>Anthropometric characteristics</b>                                                                                                                                                                                                                                                                                                                                                                                       |                  |                       |                        |             |                     |                      |                 |
| Sex (male) n (%)                                                                                                                                                                                                                                                                                                                                                                                                            | 86 (55.1)        | 35 (51.5)             | 51 (58)                | .419        | 28 (52.8)           | 58 (56.3)            | .679            |
| Age (years), mean (SD)                                                                                                                                                                                                                                                                                                                                                                                                      | 12.6 (3.2)       | 12.7 (2.84)           | 12.49 (3.39)           | .735        | NA                  | NA                   | NA              |
| Children <12 years, n (%)                                                                                                                                                                                                                                                                                                                                                                                                   | 53 (34)          | 21 (30.9)             | 32 (36.4)              | .474        | NA                  | NA                   | NA              |
| BMI (kg/m <sup>2</sup> ), mean (SD)                                                                                                                                                                                                                                                                                                                                                                                         | 20.3 (4.1)       | 20.18 (3.34)          | 20.39 (4.54)           | .754        | NA                  | NA                   | NA              |
| Pubertal status, n (%)                                                                                                                                                                                                                                                                                                                                                                                                      |                  |                       |                        | <b>.022</b> |                     |                      | <b>&lt;.001</b> |
| I                                                                                                                                                                                                                                                                                                                                                                                                                           | 51 (32.7)        | 19 (27.9)             | 32 (36.4)              |             | 44 (83)             | 7 (6.8)              |                 |
| II                                                                                                                                                                                                                                                                                                                                                                                                                          | 14 (9.0)         | 9 (13.2)              | 5 (5.7)                |             | 4 (7.5)             | 10 (9.7)             |                 |
| III                                                                                                                                                                                                                                                                                                                                                                                                                         | 20 (12.8)        | 7 (10.3)              | 13 (14.8)              |             | 4 (7.5)             | 16 (15.5)            |                 |
| IV                                                                                                                                                                                                                                                                                                                                                                                                                          | 23 (14.7)        | 16 (23.5)             | 7 (8)                  |             | 0 (0)               | 23 (22.3)            |                 |
| V                                                                                                                                                                                                                                                                                                                                                                                                                           | 48 (30.8)        | 17 (25)               | 31 (35.2)              |             | 1 (1.9)             | 47 (45.6)            |                 |
| <b>Clinical characteristics</b>                                                                                                                                                                                                                                                                                                                                                                                             |                  |                       |                        |             |                     |                      |                 |
| Duration of diabetes (years), mean (SD)                                                                                                                                                                                                                                                                                                                                                                                     | 5.65 (3.39)      | 5.52 (3.35)           | 5.75 (3.44)            | .671        | 4.06 (2.4)          | 6.47 (3.54)          | <b>&lt;.001</b> |
| HbA1c, mean (SD)                                                                                                                                                                                                                                                                                                                                                                                                            | 7.86 (1.36)      | 6.82 (0.36)           | 8.65 (1.31)            | NA          | 7.83 (1.17)         | 7.87 (1.45)          | .87             |
| HbA1c <7.5%, n (%)                                                                                                                                                                                                                                                                                                                                                                                                          | 68 (43.6)        | NA                    | NA                     |             | 21 (39.6)           | 47 (45.6)            | .474            |
| Presence of comorbidities, n (%)                                                                                                                                                                                                                                                                                                                                                                                            | 50 (32.1)        | 27 (39.7)             | 23 (26.1)              | .072        | 17 (32.1)           | 33 (32)              | .996            |
| <b>Comorbidities, n (%)</b>                                                                                                                                                                                                                                                                                                                                                                                                 |                  |                       |                        |             |                     |                      |                 |
| Asthma                                                                                                                                                                                                                                                                                                                                                                                                                      | 6 (3.8)          | 5 (7.4)               | 1 (1.1)                | .199        | 1 (1.9)             | 5 (4.9)              | .65             |
| Coeliac Disease                                                                                                                                                                                                                                                                                                                                                                                                             | 8 (5.1)          | 6 (8.8)               | 2 (2.3)                | .261        | 5 (9.4)             | 3 (2.9)              | .102            |
| Thyroiditis                                                                                                                                                                                                                                                                                                                                                                                                                 | 18 (11.5)        | 12 (17.6)             | 6 (6.8)                | .178        | 6 (11.3)            | 12 (11.7)            | .941            |
| ADHD                                                                                                                                                                                                                                                                                                                                                                                                                        | 4 (2.6)          | 1 (1.5)               | 3 (3.4)                | .322        | 1 (1.9)             | 3 (2.9)              | .999            |
| Others                                                                                                                                                                                                                                                                                                                                                                                                                      | 19 (12.2)        | 7 (10.3)              | 12 (13.6)              | .057        | 5 (9.4)             | 14 (13.6)            | .369            |
| ADHD = Attention-Deficit/Hyperactivity Disorder; BMI = body mass index; HbA1c = glycated haemoglobin; NA = Not Applicable; SD = standard deviation.                                                                                                                                                                                                                                                                         |                  |                       |                        |             |                     |                      |                 |
| Other comorbidities: allergy, obesity, iron deficiency anaemia, unilateral anorchia, immunoglobulin A (IgA) deficiency, intellectual disability, epilepsy, hypercholesterolaemia, sensorineural hearing loss, migraines, idiopathic hypercalciuria, ovarian teratoma, nephrocalcinosis, psoriasis, allergic rhinitis, vasovagal syncope, Tourette's syndrome, eating disorder (ED) and obsessive-compulsive disorder (OCD). |                  |                       |                        |             |                     |                      |                 |

## Effectiveness

### Glycated haemoglobin



In the entire sample, there was a significant increase in HbA1c (0.32%,  $P<0.001$ ). The interaction between time and the baseline HbA1c group was statistically significant at 3, 6 and 12 months ( $P<0.001$ ) (Table 2). In the subgroup analysis, participants with baseline HbA1c $<7.5\%$  revealed an increase of 0.32% (0.18 to 0.47) in HbA1c at 12 months (with respect to baseline) ( $P<0.001$ ), without exceeding, on average, the threshold of poor control. Patients with poorly controlled baseline status had a statistically significant reduction in HbA1c at all follow-ups:  $B=-0.46\%$  (-0.69 to -0.23;  $P<0.001$ ),  $B=-0.49\%$  (-0.73 to -0.25;  $P<0.001$ ), and  $B=-0.43\%$  (-0.68 to -0.19;  $P=0.001$ ), at 3, 6 and 12 months, respectively (Table 2). On average, this reduction did not attain the threshold of poor control.

| Variable                                                                   | Total sample (n=156)    |                 | HbA1c <7.5% (n=68)      |                 | HbA1c $\geq 7.5\%$ (n=88) |                 |
|----------------------------------------------------------------------------|-------------------------|-----------------|-------------------------|-----------------|---------------------------|-----------------|
|                                                                            | B (95%CI)               | P               | B (95%CI)               | P               | B (95%CI)                 | P               |
| <b>Time</b>                                                                |                         |                 |                         |                 |                           |                 |
| M3 (ref: M0)                                                               | 0.03<br>(-0.18; 0.24)   | .765            | 0.03<br>(-0.09; 0.16)   | .611            | -0.46<br>(-0.69; -0.23)   | <b>&lt;.001</b> |
| M6 (ref: M0)                                                               | 0.1<br>(-0.11; 0.32)    | .344            | 0.10<br>(-0.03; 0.23)   | .115            | -0.49<br>(-0.73; -0.25)   | <b>&lt;.001</b> |
| M12 (ref: M0)                                                              | 0.32<br>(0.10; 0.55)    | <b>.005</b>     | 0.32<br>(0.18; 0.47)    | <b>&lt;.001</b> | -0.43<br>(-0.68; -0.19)   | <b>.001</b>     |
| <b>Duration of T1DM</b>                                                    | 0.05<br>(0.007; 0.09)   | <b>.020</b>     | -0.005<br>(-0.04; 0.03) | .762            | 0.09<br>(0.02; 0.15)      | <b>.011</b>     |
| <b>Presence of comorbidities</b>                                           | -0.10<br>(-0.39; 0.18)  | .477            | 0.09<br>(-0.13; 0.30)   | .439            | -0.22<br>(-0.70; 0.26)    | .372            |
| <b>Age group: <math>\geq 12</math> years (ref: &lt;12 years)</b>           | 0.17<br>(-0.12; 0.47)   | .253            | 0.09<br>(-0.15; 0.32)   | .473            | 0.26<br>(-0.21; 0.73)     | .274            |
| <b>Baseline HbA1c group: <math>\geq 7.5\%</math> (ref: HbA1c &lt;7.5%)</b> | 1.81<br>(1.50; 2.13)    | <b>&lt;.001</b> |                         |                 |                           |                 |
| <b>Time*Baseline HbA1c Group (ref: M0 &amp; HbA1c &lt;7.5%)</b>            |                         |                 |                         |                 |                           |                 |
| M3 & HbA1c $\geq 7.5\%$                                                    | -0.49<br>(-0.78; -0.21) | <b>&lt;.001</b> |                         |                 |                           |                 |
| M6 & HbA1c $\geq 7.5\%$                                                    | -0.59<br>(-0.88; -0.29) | <b>&lt;.001</b> |                         |                 |                           |                 |
| M12 & HbA1c $\geq 7.5\%$                                                   | -0.76<br>(-1.05; -0.46) | <b>&lt;.001</b> |                         |                 |                           |                 |
| <b>Intercept</b>                                                           | 6.75<br>(6.41; 7.09)    | <b>&lt;.001</b> | 6.73<br>(6.50; 6.96)    | <b>&lt;.001</b> | 8.53<br>(8.12; 8.94)      | <b>&lt;.001</b> |

CI = confidence interval; HbA1c = glycated haemoglobin; M = month; T1DM = type 1 diabetes mellitus.

### Severe hypoglycaemic (SH) events

The reduction in the number of self-reported events was significant at 12 months  $\beta=-0.37$  (-0.62 to -0.11;  $P=0.004$ ) (Table 1 in online supplemental Appendix 5). Although the interaction with the level of HbA1c at baseline was not statistically significant ( $P=0.117$ ), the descriptive statistics (online supplemental Appendix 4) in patients with controlled HbA1c at baseline show a reduction in the mean number of events; with an increase in the poorly controlled subgroup.

SH events recorded in the EHR show significantly lower rates compared to self-reported events (online supplemental Appendix 4), without significant main or interaction effects (Table 1 in online supplemental Appendix 5). The rate of SH events was significantly higher in the subgroup with poor HbA1c control ( $P=0.014$ ) (Table 1 in online supplemental Appendix 5).

### Diabetic ketoacidosis and other serious adverse events

In the follow-up phase, six mild or moderate ketoacidosis events were recorded at three (2), six (1), and 12 months (3), respectively; and four serious adverse events at three months (two admissions and one episode of ketosis without acidosis due to bubbles in the system); and at six months (one admission). No events were observed at 12-month follow-up. No patient died during follow-up.

### Health-related quality of life

At 12 months follow-up, the percentages of severe limitations for mobility, self-care, daily activities, anxiety and depression were similar to baseline values. However, a reduction was observed in the percentage of patients who self-reported pain (**online supplemental Appendix 4**).

VAS score (**Table 1 in online supplemental Appendix 5**) did not show a significant change in the whole sample, and the interaction with baseline HbA1c values was slightly above the statistical significance level ( $P=0.061$ ). In poorly controlled patients, VAS scores were significantly reduced at 12 months compared to the baseline score  $B=-6.03$  (-9.66 to -2.41;  $P=0.001$ ). In the subgroup with good basal metabolic control, no statistically significant findings were observed.

### Knowledge of diabetes treatment

There was no significant change in patients' Knowledge of diabetes treatment, nor a significant interaction with baseline HbA1c. Patients with worse basal metabolic control revealed a significantly lower score compared to well-controlled patients:  $B=-1.27$  (-1.89 to -0.65;  $P<0.001$ ) (**Table 1 in online supplemental Appendix 5**).

### Satisfaction with treatment

General satisfaction with treatment significantly increased 3.1 points at 12 months of follow-up (0.99 to 5.23;  $P=0.004$ ) (**Table 1 in online supplemental Appendix 5**). There were no statistically significant differences in self-perceived hypo- and hyperglycaemia. For the latter, a higher score of 1.06 points (in a range of 0 to 6) was observed, in patients with  $HbA1c \geq 7.5\%$ , compared to those with good control (0.60 to 1.52;  $P<0.001$ ) (**Table 1 in online supplemental Appendix 5**).

### Safety

Mild adverse events related to the device during follow-up phases had a 3.1% and 6.6% reduction for skin reactions and discomfort or pain, respectively. However, these were not statistically significant (**Table 3**).

**Table 3. Mild adverse effects caused by the sensor**

|                           | 3 months<br>(n=150) | 6 months<br>(n=136) | 12 months<br>(n=128) | P    | Differences 12–3 months,<br>% (95%CI) |
|---------------------------|---------------------|---------------------|----------------------|------|---------------------------------------|
| Skin reactions, n (%)     | 21 (14.0)           | 16 (11.8)           | 14 (10.9)            | .542 | -3.1% (-25.2; 19.0)                   |
| Discomfort or pain, n (%) | 17 (11.3)           | 13 (9.6)            | 6 (4.7)              | .210 | -6.6% (-29.3; 16.1)                   |
| Other minor events, n (%) | 3 (2.0)             | 2 (1.5)             | 2 (1.6)              | .999 | -0.4% (-23.9; 23.1)                   |

Among the other events, there were minor haemorrhages when the sensor was positioned and wounds in the insertion area. In one case, the patient lost consciousness because of the bleeding.  
CI = confidence interval.

### Adherence

Time of sensor use (**Table 2 in online supplemental Appendix 5**) significantly increased at 6.4% at 12 months of follow-up (1.12 to 11.72;  $P=0.02$ ), compared to three months. Longer duration of T1DM ( $P=0.008$ ), and age older than 12 years ( $P=0.003$ ), significantly reduced sensor use.

A reduction in the mean number of daily scans at three months occurred in poorly controlled patients  $B=-1.92$  (-3.52 to -0.31;  $P=0.019$ ). Those aged over 12 underwent an average of four fewer scans than those aged under 12 years  $B=-3.92$  (-5.4 to -2.43;  $P<0.001$ ) (**Table 2 in online supplemental Appendix 5**).

1  
2  
3  
4 Controlled patients revealed an increase in the mean number of sensors use at 12 months of follow-up  $B=7$  (5.85  
5 to 8.06;  $P<0.001$ ); also increasing in poorly controlled patients by  $B=1.6$  (0.48 to 2.7;  $P=0.005$ ) at 6 months, and  
6  $B=9.4$  (8.25 to 10.5;  $P<0.001$ ) at 12 months (**Table 2 in online supplemental Appendix 5**).

7  
8 The percentage of time of use was statistically significantly related to a lower HbA1c level at 12 months ( $B=-0.01$ ;  
9  $P=0.013$ ), as was the number of scans ( $B=-0.21$ ;  $P<0.001$ ).

### 10 11 12 **Cost estimation**

13  
14 The estimated total annual costs per patient are shown in **Table A2 (online supplemental Appendix 3)**.  
15 Intervention short-term costs from an NHS perspective reveal that specialist visits and test strips and lancets  
16 costs account for a significant part of total costs (38% and 41%, respectively), with an average annual cost per  
17 patient of €415.48 and €447.25 for specialist visits and strips and lancets, respectively. Regarding the cost of the  
18 FSL sensor, it amounts to €43.27 according to information provided by the manufacturer. Taking into account an  
19 average number of sensors per patient per year of 26 (considering a sensor half-life of 14 days), the total annual  
20 cost of the sensor amounts to €1,125 per patient/year. This means that the average total annual costs per patient  
21 with the use of FSL amounts to €2204.26 (**Table A2 (online supplemental Appendix 3)**).

22  
23 Total annual costs before and after use of the FSL system can be found in **Figure 2**. All measured costs decreased  
24 after use of the device throughout 12 months follow-up, with the most striking difference in costs related to test  
25 strips and lancets use, an annual difference of €856.68 per patient.

26  
27  
28 This information is outlined in **Table A3 (online supplemental Appendix 3)**. The annual average number of test  
29 strips per patient decreased from 2686.02 strips per year before the use of the FSL, to 883.98 strips per year  
30 after its use. The difference in the annual average use of lancets per patient also reduced from 1366.41 before  
31 FSL use to 615.94 after its use.

32  
33 Furthermore, a decrease in total annual costs due to productivity losses of parents/caregivers of minor patients  
34 with T1DM was observed after the use of FSL (€545.67 versus €262.73) as shown in **Table A3 (online**  
35 **supplemental Appendix 3)**.

## DISCUSSION

Glucose monitoring devices can help people with T1DM monitor their glycaemia levels and reduce the frequency and/or severity of acute disease-complication rates, thus improving their HRQoL and life expectancy [34]. Two meta-analyses of case series on the effectiveness of the FSL revealed statistically significant HbA1c reductions in children/adolescents with poor HbA1c control (7.5%-9.6%, except two studies with 7.1% and 7.4%) of -0.54% (n=447) [35] and -0.29% (n=959) [11], although the effect was highly variable across studies. Our study only provides a statistically significant reduction of HbA1c in the group with poor baseline monitoring, (-0.46%, -0.49% and -0.35%), at 3, 6 and 12 months, respectively. On the contrary, patients with basal controlled HbA1c levels revealed a significant 12-month worsening higher than 0.30%. Another case series in Spain (n=145) [36], with limited follow up to three months, also detected a reduction in patients with HbA1c $\geq$ 7.5% (-0.41,  $P=0.004$ ), and a statistically significant increase in well-monitored patients, i.e. a worsening in HbA1c levels (0.23,  $P=0.03$ ). The uncontrolled design of the study precludes ruling out that this result just reflects a regression to the mean. A recent meta-analysis of randomized controlled trials on the effectiveness of continuous glucose monitoring in people with T1DM showed a significant effect only in studies with mean HbA1c values at baseline  $>8\%$  (-0.49%) [37]. However, apart from not being based exclusively on non-adult population, this result is based on meta-analysis and not on the analysis of interactions in the individual studies, and therefore it is subjected to potential risk of ecological fallacy.

The results also revealed a significant reduction in the number of self-reported SH events for the whole sample (-0.37), but not in the number of patients with at least one event. The interaction effect with baseline HbA1c level was not statistically significant for these two variables ( $P=0.117$  and  $P=0.108$ , respectively). The descriptive statistics suggest different subgroup effects, although none was statistically significant. The reduction of self-reported SH events occurred in patients with controlled HbA1c levels at baseline (0.39), whereas in the basally uncontrolled group, an increase was self-reported (0.37 more); together with an important increase in the rate of patients with at least one event (from 26% to 38%). Again, an effect of regression to the mean could be the explanation for this result since, as expected, patients with controlled HbA1c at baseline showed higher SH rates and means. Alternatively, the results on both HbA1c and SH could be reflecting the trade-off faced by patients with T1DM between the reduction in glucose levels and the associated risk of increasing hypoglycaemic events. This interpretation is speculative given the commented methodological limitations of the study, but it would help account for the unexpected significant worsening in self-perceived general health observed in the subgroup of poor baseline HbA1c monitoring. That is, contrary to the HbA1c improvement attained, that has no observable effects on self-perceived HRQoL, suffering an SH event is a salient experience that may impact this self-perception.

Other studies [36] have also reported a significant and clinically meaningful improvement in the rate of SH events (from 4.2 to 0.2 events/100 patients-year). However, their results are not reported separately according to basal levels of metabolic control. The largest case series published to date with children and adolescents [38], and with the longest follow-up (12 months), also revealed a statistically significant reduction of SH events (53%,  $P=0.012$ ) for the whole sample, with no changes in HbA1c.

The interaction of the intervention with the age group ( $<12$  vs.  $\geq 12$  years-old) was not statistically significant in any case. However, descriptive statistics reveal different non-significant trends among subgroups, with positive results only for younger participants: -0.26% vs. -0.05% (HbA1c), -1.06 vs. 0.68 (SH events) and -4.2% vs. 10.5% (people with one or more SH). Adolescents revealed significantly lower sensor usage time and scans per day than children, similar to the results observed in previous studies [39-41]. Adolescents and young adults face specific challenges and barriers regarding the use of glucose monitoring sensors, such as concerns about self-image and how people perceive them [42,43], differential emotional reactions to diabetes burden [44] or a lesser interest in glucose data analysis [45], and therefore specific strategies might be necessary to increase sensor use in this population [46]. Nonetheless, adolescents in our sample showed adequate adherence throughout the study, above 78% of the time at each successive evaluation. Regarding the effectiveness of the FLS in adolescents,

1  
2  
3  
4 the only randomized controlled trial to date included participants aged 13-20 years, with HbA1c $\geq$ 9.0%) [13], and  
5 although it found significantly higher satisfaction in the intervention group at 6 months, it did not reveal any  
6 statistically significant differences in HbA1c reduction compared to traditional self-monitoring. Therefore,  
7 significant uncertainty remains in regard to the effects of FSL in adolescents.  
8

9 Despite the improvement in the degree of metabolic control that occurred in our study sample of patients  
10 with worse baseline HbA1c levels, no statistically significant improvement was observed in their knowledge of  
11 diabetes treatment. Device adherence was significantly related to the reduction of HbA1c, a result usually  
12 observed in the literature on glucose monitoring devices [39-41]. The same can be said about treatment  
13 satisfaction [47,48], which improved in the whole sample.  
14

15 In regard to safety, no serious adverse effects were observed, a result consistent with the literature on  
16 glucose monitoring devices in general [9]. The number of patients showing mild adverse events at three months  
17 was reduced at the end of follow-up to 18%, resulting in two losses at six months follow-up due to skin reaction  
18 to the sensor and another two at 12 months due to discomfort with the sensor.  
19

20 In terms of costs analysis as observed in the international literature, our results showed that T1DM patients  
21 consume less healthcare resources using FSL [49]. Fundamentally, a striking decrease was observed in costs  
22 attributed to reactive strips and lancets, where an annual difference of €856.68 per patient was obtained (not  
23 including cost of sensor). A decrease in total indirect annual costs due to productivity losses of parents/carers of  
24 T1DM patients, was also observed (€545.67 versus €262.73). Despite the savings observed in all cost categories,  
25 when the cost of the device is taken into account, there is no potential savings with the use of the FSL. However,  
26 this information can be useful for decision-making and negotiating the price of the device.  
27

28 The main limitation of this study lies in its uncontrolled design, which precludes comparison with an  
29 untreated group. Therefore, an inference of causality regarding the introduction of the FLS is not possible,  
30 because other factors such as child developmental growth, potential changes in target treatment or insulin  
31 administration methods or a regression to the mean could affect the observed changes. A “novelty effect”,  
32 related to the use of a technological device could also introduce a motivation bias that could affect self-  
33 management habits. Another relevant limitation is the limited sample size to analyse interaction effects, even  
34 when we increased the recruited sample fourfold. By the time of study execution, the FSL was already financed  
35 and introduced in some hospitals taking part and a large portion of the target population was already using it.  
36 This scenario was an important recruitment obstacle to enlarge sample size. Our conclusions to be drawn are,  
37 therefore, limited by the low statistical power for interaction analyses and rare events such as severe  
38 hypoglycaemia. All these limitations imply a low quality of the evidence.  
39

40 The start-up of a monitoring study has been used to collect data on the use of resources and make initial  
41 estimates of the cost of the intervention. Therefore, our cost analysis was a secondary endpoint and  
42 complementary to this study’s primary endpoint and it has limitations. First, our analysis has not taken into  
43 account the costs attributable to the possible adverse effects arising from the use of FSL and it has assumed that  
44 possible failures of the device will be resolved at no additional cost to the Spanish NHS. Moreover, it was not  
45 possible to estimate the costs related to hospitalization of the patients since the number of days of each  
46 hospitalization was not recorded in this study. However, the extremely low number of total hospitalizations  
47 during the monitoring study indicates that including this cost in the estimate would not have produced  
48 substantial changes in the results.  
49

50 To the best of our knowledge, this is the first comparative costs analysis study of FSL use in children and  
51 adolescents with T1DM in Spain using observational data in an actual use scenario. Therefore, although a cost-  
52 effectiveness analysis could not be performed in this study, due to the absence of a comparator, our results may  
53 contribute to inform future cost-effectiveness studies of FSL in Spain.  
54  
55  
56  
57  
58  
59  
60

**CONCLUSION**

Our results showed that the use of FSL in young T1DM patients significantly reduced the rate of SH events, and improved HbA1c levels in patients with poor baseline control. However, future studies should confirm whether these benefits could be at the cost of worsening outcomes in patients with lower HbA1c. No serious adverse events related to FSL were observed. The results also suggest that the use of FSL in young patients with T1DM leads to a decrease in monitoring costs. In addition, the use of FSL reduces costs attributable to lost productivity of parents/caregivers. However, these outcomes correspond to low-quality evidence, mainly due to the study's uncontrolled design, in addition to the low statistical power in the case of rare complications such as SH.

Based on these results and other information sources (i.e., international research and clinical expert advice), the Spanish Ministry of Health has decided to reimburse the FreeStyle Libre (FSL) for children and adolescents aged 4-17 years with type 1 diabetes who are treated with intensive insulin therapy (multiple daily injections or insulin pump) and require at least six fingerstick blood glucose self-monitoring tests a day.

## Footnotes

**Collaborators:** The Health Professional Group included the following members (in alphabetical order): Amparo González Vergaz (Hospital Severo Ochoa), Ana María Prado Carro (Complejo Hospitalario Universitario A Coruña), Anunciación Beisti Ortego (Fundación Hospital Calahorra), Ariadna Campos Martorell (Hospital Universitari Vall D'hebron), Atilano José Carcavilla Urqui (Hospital Universitario La Paz), Cristina Amparo Del Castillo Villaescusa (Hospital Universitario Dr. Peset Aleixandre), Estela Gil Poch (Hospital Universitario de Badajoz), Francisco Javier Arroyo Diez (Hospital Universitario de Badajoz), Gemma Novoa Gómez (Complejo Hospitalario Universitario de Ourense), Isabel González Casado (Hospital Universitario La Paz), Juncal Martínez Ibáñez (Fundación Hospital Calahorra), Laura Cuadrado Piqueras (Fundación Hospital Calahorra), Leticia Reis Iglesias (Complejo Hospitalario Universitario de Ourense), Lucia Garzón Lorenzo (Hospital Universitario 12 De Octubre), Luis Salamanca Fresno (Hospital Universitario La Paz), María Asunción Martínez Brocca (Hospital Universitario Virgen Macarena), María Aurea Rodríguez Blanco (Hospital Da Barbanza), María Del Mar Martínez López (Hospital Universitario 12 De Octubre), María Jesús Ferreiro Rodríguez (Complejo Hospitalario Universitario de Ourense), María Ruiz del Campo (Hospital San Pedro), Nerea Itza Martín (Hospital Universitario La Paz), Patricia García Navas (Hospital San Pedro), Rebeca García García (Hospital Universitario Central de Asturias).

**Contributors:** YAP, ARS, LPP and PSA initiated the study. HGP did the acquisition of data. HGP, ARS, CVN and YRF contributed to the analysis and interpretation of data. HGP did the statistical analyses. HGP, ARS, CVN YAP and YRF wrote the first draft of the manuscript. HGP, ARS, YRF, CVN, YAP, LGP, MAGB, LPP AND PSA critically revised the manuscript and approved the final version. HGP is responsible for the overall content as the guarantor and accepts full responsibility for the work and/or the conduct of the study, had access to the data, and controlled the decision to publish.

**Competing interests:** None declared.

**Funding:** This work was financed by the Spanish Ministry of Health, Consumer Affairs and Social Welfare in the framework of activities developed by the Spanish Network of Agencies for Health Technology Assessment for the Spanish National Health Service.

**Data availability statement:** Data are not publicly available. Data are available upon reasonable request via the corresponding author.

**Patient consent for publication:** Not applicable.

**Ethics approval:** The scientific and ethics committees approved the study protocol (Hospital Universitari Vall d'Hebron, ID-RTF065). All participants provided written informed consent.

## References

- 1  
2  
3  
4 1. Lucier J, Weinstock RS, Doerr C. Diabetes Mellitus Type 1 (Nursing). In: *StatPearls*. Treasure Island (FL): StatPearls Publishing; March 3, 2023-. PMID: 33760510
- 5  
6  
7 2. Golden SH, Sapir T. Methods for insulin delivery and glucose monitoring in diabetes: summary of a comparative effectiveness review. *J. Manag. care Pharm.* 2012;18(6):S1 17. doi:10.18553/jmcp.2012.18.s6-a.1
- 8  
9  
10 3. Miranda Velasco MJ, Domínguez Martín E, Arroyo Díez FJ, Méndez Pérez P, González de Buitrago Amigo J. Calidad de vida relacionada con la salud en la diabetes mellitus tipo 1. *An. Pediatría.* 2012 Nov;77(5):329–33. doi: 10.1016/j.anpedi.2012.03.005
- 11  
12  
13  
14 4. International Diabetes Federation. IDF diabetes atlas. 8.aed.Bruselas, Bélgica; 2017.2
- 15  
16 5. Conde Barreiro S, Rodríguez Rigual M, Bueno Lozano G, et al. Epidemiología de la diabetes mellitus tipo 1 en menores de 15 años en España. *An. Pediatría.* 2014;81(3):189.e1 189.e12. doi: 10.1016/j.anpedi.2013.12.010
- 17  
18  
19 6. Crespo C, Brosa M, Soria-Juan A, Lopez-Alba A, López-Martínez N, Soria B. Costes directos de la diabetes mellitus y de sus complicaciones en España (Estudio SECCAID: Spain estimated cost Ciberdem-Cabimer in Diabetes). *Av. en Diabetol.* 2013;29(6):182–189
- 20  
21  
22  
23 7. Klonoff DC, Ahn D, Drincic A. Continuous glucose monitoring: A review of the technology and clinical use. *Diabetes Res. Clin. Pract.* 2017;133:178-192. doi: 10.1016/j.diabres.2017.08.005
- 24  
25  
26 8. Marsters BL, Boucher SE, Galland BC, et al. Cutaneous adverse events in a randomized controlled trial of flash glucose monitoring among youth with type 1 diabetes mellitus. *Pediatr Diabetes.* 2020;21(8):1516-1524
- 27  
28  
29 9. Landau Z, Abiri S, Gruber N, et al. Use of flash glucose-sensing technology (FreeStyle Libre) in youth with type 1 diabetes: AWeSoMe study group real-life observational experience [published correction appears in *Acta Diabetol.* 2018 Sep 12;:]. *Acta Diabetol.* 2018;55(12):1303-1310. doi:10.1007/s00592-018-1218-8
- 30  
31  
32  
33 10. Gao Y, Zhou M, Xu X, Chen WY. Effects of flash glucose monitoring on glycemic control in participants with diabetes mellitus: A meta-analysis of randomized controlled trials. *J Diabetes Complications.* 2022;36(11):108314. doi:10.1016/j.jdiacomp.2022.108314
- 34  
35  
36  
37 11. Gordon I, Rutherford C, Makarounas-Kirchmann K, Kirchmann M. Meta-analysis of average change in laboratory-measured HbA1c among people with type 1 diabetes mellitus using the 14 day Flash Glucose Monitoring System. *Diabetes Res Clin Pract.* 2020;164:108158. doi:10.1016/j.diabres.2020.108158
- 38  
39  
40  
41 12. Castellana M, Parisi C, Di Molfetta S, et al. Efficacy and safety of flash glucose monitoring in patients with type 1 and type 2 diabetes: a systematic review and meta-analysis. *BMJ Open Diabetes Res Care.* 2020;8(1):e001092. doi:10.1136/bmjdr-2019-001092
- 42  
43  
44  
45 13. Boucher SE, Gray AR, Wiltshire EJ, et al. Effect of 6 Months of Flash Glucose Monitoring in Youth With Type 1 Diabetes and High-Risk Glycemic Control: A Randomized Controlled Trial. *Diabetes Care.* 2020;43(10):2388-2395. doi:10.2337/dc20-0613
- 46  
47  
48  
49 14. Serrano-Aguilar P, Asua-Batarrita J, Molina-López MT, et al. The Spanish Network of Agencies for Health Technology Assessment and Services of the National Health System (RedETS). *Int J Technol Assess Health Care.* 2019 Jan;35(3):176-180. doi: 10.1017/S0266462319000205. Epub 2019 Apr 22. PMID: 31006412.
- 50  
51  
52  
53 15. Perestelo-Pérez L, Rivero-Santana A, García-Lorenzo B, Castilla-Rodríguez I, Vallejo-Torres L, García-Pérez L, et al. Efectividad, seguridad y coste-efectividad del sistema flash de monitorización de glucosa en líquido intersticial (FreeStyle Libre®) para la Diabetes Mellitus tipo 1 y 2. Ministerio de Sanidad, Servicios Sociales e Igualdad. Servicio de Evaluación del Servicio Canario de la Salud; 2016. Informes de Evaluación de Tecnologías Sanitarias.
- 54  
55  
56  
57  
58  
59  
60



- 1  
2  
3  
4 16. Perestelo-Pérez L, Rivero-Santana A, García-Lorenzo B, Castilla-Rodríguez I, Vallejo-Torres L, García-Pérez L,  
5 et al. Efectividad, seguridad y coste-efectividad del sistema flash de monitorización de glucosa en líquido  
6 intersticial (FreeStyle Libre®) para la Diabetes Mellitus tipo 1 y 2 (Apéndice de actualización). Ministerio de  
7 Sanidad, Servicios Sociales e Igualdad. Servicio de Evaluación del Servicio Canario de la Salud; 2017. Informes de  
8 Evaluación de Tecnologías Sanitarias.  
9
- 10 17. Servicio de Evaluación del Servicio Canario de la Salud. (s.f.). <http://www.sescs.es/>  
11
- 12 18. Resolución de 26 de abril de 2019, de la Dirección General de Cartera Básica de Servicios del Sistema Nacional  
13 de Salud y Farmacia, por la que se hace público el acuerdo de la Comisión de prestaciones, aseguramiento y  
14 financiación de 5 de noviembre de 2018 y 28 de marzo de 2019, sobre el sistema de monitorización de glucosa  
15 mediante sensores (tipo flash) en adultos en la cartera común de servicios del Sistema Nacional de Salud.  
16 [https://www.sanidad.gob.es/profesionales/prestacionesSanitarias/CarteraDeServicios/ContenidoCS/docs/Reso-](https://www.sanidad.gob.es/profesionales/prestacionesSanitarias/CarteraDeServicios/ContenidoCS/docs/Resolucionglucosadultos.pdf)  
17 [lucionglucosadultos.pdf](https://www.sanidad.gob.es/profesionales/prestacionesSanitarias/CarteraDeServicios/ContenidoCS/docs/Resolucionglucosadultos.pdf)  
18
- 19 19. Resolución de 30 de noviembre de 2020, de la Dirección General de Cartera Común de Servicios del Sistema  
20 Nacional de Salud y Farmacia, por la que se hace público el acuerdo de la Comisión de prestaciones,  
21 aseguramiento y financiación de 14 de julio de 2020 sobre el sistema de monitorización de glucosa mediante  
22 sensores (tipo flash) en la cartera común de servicios del Sistema Nacional de Salud.  
23 [https://www.sanidad.gob.es/profesionales/prestacionesSanitarias/CarteraDeServicios/ContenidoCS/docs/Reso-](https://www.sanidad.gob.es/profesionales/prestacionesSanitarias/CarteraDeServicios/ContenidoCS/docs/Reso)  
24 [l\\_Flash\\_2020.pdf](https://www.sanidad.gob.es/profesionales/prestacionesSanitarias/CarteraDeServicios/ContenidoCS/docs/Reso)  
25
- 26 20. Serrano-Aguilar P, Gutierrez-Ibarluzea I, Díaz P, Imaz-Iglesia I, González-Enríquez J, Castro JL, Espallargues M,  
27 et al. Postlaunch evidence-generation studies for medical devices in Spain: the RedETS approach to integrate  
28 real-world evidence into decision making. *Int J Technol Assess Health Care*. 2021 May 4;37(1):e63. doi:  
29 10.1017/S0266462321000295  
30
- 31 21. Resolución de 28 de agosto de 2018, de la Dirección General de Cartera Básica de Servicios del Sistema  
32 Nacional de Salud y Farmacia, por la que se determina el sometimiento del sistema de monitorización de glucosa  
33 mediante sensores (tipo flash) a estudio de monitorización y se establecen sus requisitos específicos.  
34 <https://www.boe.es/boe/dias/2018/09/18/pdfs/BOE-A-2018-12686.pdf>  
35
- 36 22. Abbott Diabetes Care. Manual de Usuario. FreeStyle Libre. Sistema Flash de Monitorización de Glucosa.  
37 Madrid: 2017  
38
- 39 23. Wille N, Badia X, Bonsel G, et al. Development of the EQ-5D-Y: A child-friendly version of the EQ-5D. *Quality*  
40 *of Life Research*. 2010;19(6):875–886. 14. doi: 10.1007/s11136-010-9648-y  
41
- 42 24. Mitchell K, Johnson K, Cullen K, et al. Parental mastery of continuous subcutaneous insulin infusion skills and  
43 glycemic control in youth with type1 diabetes. *Diabetes Technol Ther*. 2013;15(7):591-595. doi:  
44 10.1089/dia.2013.0031  
45
- 46 25. Bradley C. The Diabetes Treatment Satisfaction Questionnaire: DTSQ. In: Bradley C, editor. Handbook of  
47 Psychology and Diabetes: a guide to psychological measurement in diabetes research and practice. Chur,  
48 Switzerland: Harwood Academic Publishers. 1994. pp. 111–132  
49
- 50 26. Tanner, J M. Growth at Adolescence: With a General Consideration of the Effects of Hereditary and  
51 Environmental Factors Upon Growth and Maturation from Birth to Maturity. Oxford: Blackwell Scientific  
52 Publications, 1962. Print.  
53
- 54 27. Hayes AJ, Leal J, Gray AM, et al. UKPDS outcomes model 2: a new version of a model to simulate lifetime  
55 health outcomes of patients with type 2 diabetes mellitus using data from the 30 year United Kingdom  
56 Prospective Diabetes Study: UKPDS 82. *Diabetologia*. 2013;56(9):1925-1933. doi: 10.1007/s00125-013-2940-y  
57
- 58 28. StataCorp. Stata statistical software: release 15. College Station, TX: StataCorp LLC, 2017.  
59  
60

- 1  
2  
3  
4 29. IBM Corp. Released 2011. IBM SPSS Statistics for Windows, Version 20.0. Armonk, NY: IBM Corp.  
5  
6 30. Instituto Nacional de Estadística (INE). Actualización de rentas con el IPC general (sistema IPC base 2016) para  
7 periodos anuales completos. Disponible en: <https://www.ine.es/calcula/>  
8  
9 31. Zhu W. Making bootstrap statistical inferences: a tutorial. *Res Q Exerc Sport*. 1997; 68:44-55. doi:  
10 10.1080/02701367.1997.10608865  
11  
12 32. Eurostat. Labour cost levels by NACE Rev. 2 activity. Disponible en:  
13 [https://ec.europa.eu/eurostat/databrowser/view/lc\\_lci\\_lev/default/table?lang=en](https://ec.europa.eu/eurostat/databrowser/view/lc_lci_lev/default/table?lang=en)  
14  
15 33. Instituto Nacional de Estadística (INE). Encuesta de Población Activa (EPA). Disponible en:  
16 [https://www.ine.es/dyngs/INEbase/es/operacion.htm?c=Estadistica\\_C&cid=1254736176918&menu=ultiDatos](https://www.ine.es/dyngs/INEbase/es/operacion.htm?c=Estadistica_C&cid=1254736176918&menu=ultiDatos)  
17 &idp=1254735976595  
18  
19 34. Ang E, Lee ZX, Moore S, Nana M. Flash glucose monitoring (FGM): A clinical review on glycaemic outcomes  
20 and impact on quality of life. *J Diabetes Complications*. 2020 Jun;34(6):107559. doi:  
21 10.1016/j.jdiacomp.2020.107559  
22  
23 35. Evans M, Welsh Z, Ells S, et al. The Impact of Flash Glucose Monitoring on Glycaemic Control as Measured by  
24 HbA1c: A Meta-analysis of Clinical Trials and Real-World Observational Studies. *Diabetes Ther*. 2020;11(1):83-95.  
25 doi: 10.1007/s13300-019-00720-0  
26  
27 36. Leiva-Gea I, Garcia Vázquez J, Liñán Jurado FR, et al. Introduction of Flash Glucose Monitoring in Children  
28 with Type 1 Diabetes: Experience of a Single-Centre in Spain. *ESPE Abstracts (2019) 92 LB-20*.  
29  
30 37. Teo E, Hassan N, Tam W, Koh S. Effectiveness of continuous glucose monitoring in maintaining glycaemic  
31 control among people with type 1 diabetes mellitus: a systematic review of randomised controlled trials and  
32 meta-analysis. *Diabetologia*. 2022;65(4):604-619. doi:10.1007/s00125-021-05648-4  
33  
34 38. Messaaoui A, Tenoutasse S, Crenier L. Flash Glucose Monitoring Accepted in Daily Life of Children and  
35 Adolescents with Type 1 Diabetes and Reduction of Severe Hypoglycemia in Real-Life Use. *Diabetes Technol Ther*.  
36 2019 Jun;21(6):329-335. doi: 10.1089/dia.2018.0339  
37  
38 39. Urakami T, Yoshida K, Kuwabara R, et al. Frequent scanning using flash glucose monitoring contributes to  
39 better glycemic control in children and adolescents with type 1 diabetes. *J Diabetes Investig*. 2022;13(1):185-  
40 190. doi: 10.1111/jdi.13618  
41  
42 40. Lameijer A, Lommerde N, Dunn TC, et al. Flash Glucose Monitoring in the Netherlands: Increased monitoring  
43 frequency is associated with improvement of glycemic parameters. *Diabetes Res Clin Pract*. 2021;177:108897.  
44 doi: 10.1016/j.diabres.2021.108897  
45  
46 41. Battelino T, Liabat S, Veeze HJ, et al. Routine use of continuous glucose monitoring in 10 501 people with  
47 diabetes mellitus. *Diabet Med*. 2015;32(12):1568-74. doi:10.1111/dme.12825  
48  
49 42. Messer LH, Tanenbaum ML, Cook PF, et al. Cost, Hassle, and On-Body Experience: Barriers to Diabetes  
50 Device Use in Adolescents and Potential Intervention Targets. *Diabetes Technol Ther*. 2020;22(10):760-767.  
51 doi:10.1089/dia.2019.0509  
52  
53 43. Borus JS, Laffel L. Adherence challenges in the management of type 1 diabetes in adolescents: prevention  
54 and intervention. *Curr Opin Pediatr*. 2010;22(4):405-411. doi:10.1097/MOP.0b013e32833a46a7  
55  
56 44. Patton SR, Clements MA. Psychological Reactions Associated With Continuous Glucose Monitoring in Youth. *J*  
57 *Diabetes Sci Technol*. 2016;10(3):656-661. Published 2016 May 3. doi:10.1177/1932296816638109  
58  
59  
60

1  
2  
3  
4 45. Huhn F, Lange K, Jördening M, et al. Real-World Use of Continuous Glucose Monitoring Systems Among  
5 Adolescents and Young Adults With Type 1 Diabetes: Reduced Burden, but Little Interest in Data Analysis. *J*  
6 *Diabetes Sci Technol.* 2023;17(4):943-950. doi:10.1177/19322968221081216  
7

8 46. Prahalad P, Ebekozi O, Alonso GT, et al. Multi-Clinic Quality Improvement Initiative Increases Continuous  
9 Glucose Monitoring Use Among Adolescents and Young Adults With Type 1 Diabetes. *Clin Diabetes.*  
10 2021;39(3):264-271. doi:10.2337/cd21-0026  
11

12 47. Ang E, Lee ZX, Moore S, et al. Flash glucose monitoring (FGM): A clinical review on glycaemic outcomes and  
13 impact on quality of life. *J Diabetes Complications.* 2020;34(6):107559. doi: 10.1016/j.jdiacomp.2020.107559  
14

15 48. Palylyk-Colwell E, Ford C. Flash Glucose Monitoring System for Diabetes. 2017 Jun 1. In: *CADTH Issues in*  
16 *Emerging Health Technologies.* Ottawa (ON): Canadian Agency for Drugs and Technologies in Health; 2016-. 158.  
17 PMID: 29369576.  
18

19 49. Lin R, Brown F, James S, Jones J, Ekinci E. Continuous glucose monitoring: A review of the evidence in type 1  
20 and 2 diabetes mellitus. *Diabet Med.* 2021 May;38(5):e14528. doi: 10.1111/dme.14528. Epub 2021 Mar 6. PMID:  
21 33496979.  
22

## 23 24 25 **FIGURE TITLES**

26  
27 **Figure 1. Study flowchart**

28  
29 **Figure 2. Total annual costs per patient before and after use of the FSL**  
30  
31  
32  
33  
34  
35  
36  
37  
38  
39  
40  
41  
42  
43  
44  
45  
46  
47  
48  
49  
50  
51  
52  
53  
54  
55  
56  
57  
58  
59  
60



Figure1. Flow-charts

201x216mm (96 x 96 DPI)

1  
2  
3  
4  
5  
6  
7  
8  
9  
10  
11  
12  
13  
14  
15  
16  
17  
18  
19  
20  
21  
22  
23  
24  
25  
26  
27  
28  
29  
30  
31  
32  
33  
34  
35  
36  
37  
38  
39  
40  
41  
42  
43  
44  
45  
46  
47  
48  
49  
50  
51  
52  
53  
54  
55  
56  
57  
58  
59  
60

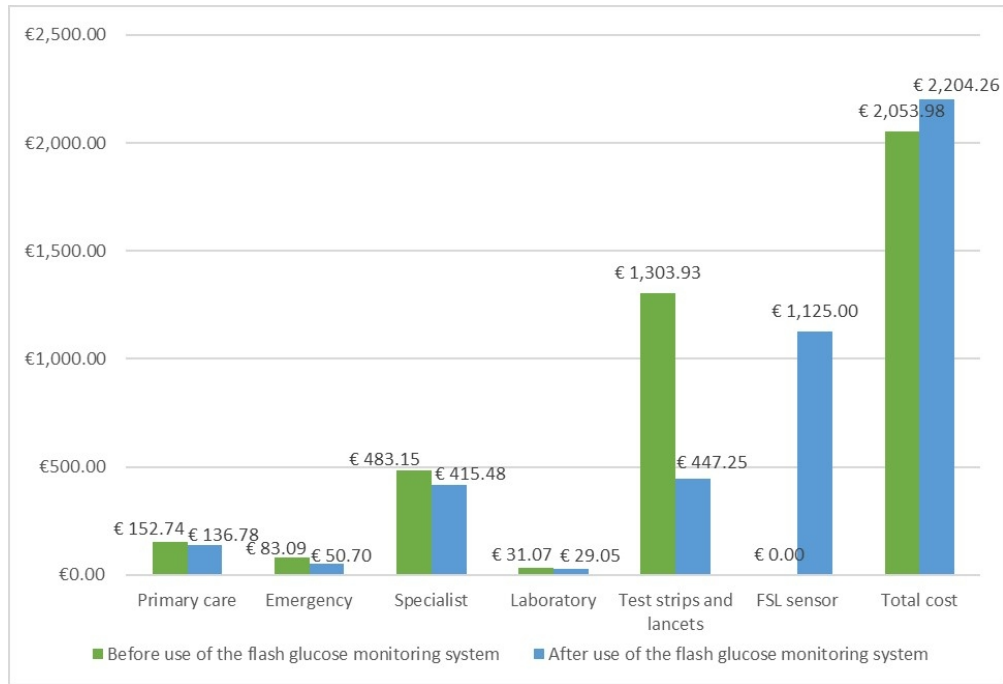

Figure 2. Total annual costs per patient before and after use of the FSL

163x111mm (150 x 150 DPI)

**Appendix 1. Participating hospitals and cases included in the study**

| Public hospitals                         | Regional Health Services | Number of patients |
|------------------------------------------|--------------------------|--------------------|
| Virgen Macarena University Hospital*     | Andalucía                | 2                  |
| Central de Asturias University Hospital* | Asturias                 | 4                  |
| Vall D'hebron University Hospital*       | Cataluña                 | 22                 |
| Badajoz University Hospital              | Extremadura              | 30                 |
| A Coruña University Hospital Complex*    | Galicia                  | 23                 |
| Ourense University Hospital Complex      | Galicia                  | 14                 |
| Barbanza Hospital                        | Galicia                  | 5                  |
| Calahorra Hospital Foundation            | La Rioja                 | 1                  |
| San Pedro Hospital                       | La Rioja                 | 13                 |
| Severo Ochoa Hospital                    | Madrid                   | 21                 |
| 12 De Octubre University Hospital*       | Madrid                   | 4                  |
| La Paz University Hospital*              | Madrid                   | 16                 |
| Dr. Peset Aleixandre University Hospital | Valencia                 | 1                  |
| *Tertiary hospital                       |                          |                    |

1  
2  
3  
4  
5  
6  
7  
8  
9  
10  
11  
12  
13  
14  
15  
16  
17  
18  
19  
20  
21  
22  
23  
24  
25  
26  
27  
28  
29  
30  
31  
32  
33  
34  
35  
36  
37  
38  
39  
40  
41  
42  
43  
44  
45  
46

**Appendix 2. Comparability analysis and description of the missing data imputation model**

**Comparability analysis**

For comparability analysis, the baseline characteristics of patients (gender, age, HbA1c, BMI, time since diagnosis, presence of comorbidities, and pubertal stage) were compared between participants who completed the different follow-up phases and those who had total or partial loss to follow-up at 3, 6, and 12 months. No significant differences were found for any of these variables at the 3-month follow-up. At 6 months, significant differences were observed between responders and non-responders in relation to pubertal stage V (25% vs. 75%) (p = 0.04). At the 12-month follow-up, differences were observed in pubertal stages IV (21.7% vs. 78.3%) and V (31.2% vs. 68.8%) (p = 0.007); significant differences were also observed in the mean age value (p = 0.04) between responders (12.3 years) and non-responders (13.7 years).

|                                  | 3 months                             |                                                 |       | 6 months                              |                                                 |              | 12 months                             |                                                 |              |
|----------------------------------|--------------------------------------|-------------------------------------------------|-------|---------------------------------------|-------------------------------------------------|--------------|---------------------------------------|-------------------------------------------------|--------------|
|                                  | Participants lost to follow-up (n=6) | Participants who continued in the study (n=150) | p     | Participants lost to follow-up (n=20) | Participants who continued in the study (n=136) | p            | Participants lost to follow-up (n=28) | Participants who continued in the study (n=128) | p            |
| Sex (male), n (%)                | 4 (4.7)                              | 82 (95.3)                                       | 0.562 | 8 (9.3)                               | 78 (90.7)                                       | 0.145        | 16 (18.6)                             | 70 (81.4)                                       | 0.813        |
| Age (years), mean (SD)           | 13 (4.86)                            | 12.55 (3.09)                                    | 0.829 | 13.3 (3.81)                           | 12.46 (3.05)                                    | 0.266        | 13.68 (2.91)                          | 12.32 (3.17)                                    | <b>0.039</b> |
| HbA1c, mean (SD)                 | 8.42 (0.62)                          | 7.83 (1.38)                                     | 0.303 | 8.36 (2.01)                           | 7.78 (1.23)                                     | 0.224        | 8.08 (1.81)                           | 7.81 (1.24)                                     | 0.33         |
| BMI, mean (SD)                   | 20.73 (2.87)                         | 20.28 (4.10)                                    | 0.789 | 21.33 (2.91)                          | 20.14 (4.18)                                    | 0.224        | 21.33 (2.88)                          | 20.07 (4.24)                                    | 0.135        |
| Duration of DM1, mean (SD)       | 7.19 (3.86)                          | 5.59 (3.37)                                     | 0.257 | 6.42 (3.43)                           | 5.54 (3.38)                                     | 0.275        | 6.74 (3.39)                           | 5.41 (3.36)                                     | 0.061        |
| Presence of comorbidities, n (%) | 1 (2.0)                              | 49 (98.0)                                       | 0.41  | 7 (14)                                | 43 (86)                                         | 0.762        | 9 (18)                                | 41 (82)                                         | 0.991        |
| Pubertal status, n (%)           |                                      |                                                 | 0.473 |                                       |                                                 | <b>0.043</b> |                                       |                                                 | <b>0.007</b> |
| I                                | 2 (3.9)                              | 49 (96.1)                                       |       | 5 (9.8)                               | 46 (90.2)                                       |              | 5 (9.8)                               | 46 (90.2)                                       |              |
| II                               | 0 (0)                                | 14 (100)                                        |       | 1 (7.1)                               | 13 (92.9)                                       |              | 3 (21.4)                              | 11 (78.6)                                       |              |
| III                              | 0 (0)                                | 20 (100)                                        |       | 0 (0)                                 | 20 (100)                                        |              | 0 (0)                                 | 20 (100)                                        |              |
| IV                               | 0 (0)                                | 23 (100)                                        |       | 2 (8.7)                               | 21 (91.3)                                       |              | 5 (21.7)                              | 18 (78.3)                                       |              |
| V                                | 4 (8.3)                              | 44 (91.7)                                       |       | 12 (25)                               | 36 (75)                                         |              | 15 (31.2)                             | 33 (68.8)                                       |              |

SD = Standard deviation; HbA1c = Glycated haemoglobin; BMI = Body mass index.

### Description of the missing data imputation model

For multiple imputation was performed by chained equations using Stata 15.0 software. The variables sex, age, pubertal stage, presence of comorbidities and duration of diabetes were considered regular and used as predictors for imputation. A total of 29 variables were imputed. Each variable was imputed in chronological order: 3, 6 and 12 months. As a general rule, the latest available information on the variable to be imputed was used. When information from other variables was used, the information from the same point in time was used. A total of 10 imputations were made for each missing data.

| Order | Imputed variable                            | Variables used in imputation                                                                                                                                                                                                       | Imputation model | n (%) missing |
|-------|---------------------------------------------|------------------------------------------------------------------------------------------------------------------------------------------------------------------------------------------------------------------------------------|------------------|---------------|
| 1     | HbA1c 3M                                    | Sex, Age, Pubertal stage, Presence of comorbidities, Time since diagnosis, HbA1c Baseline                                                                                                                                          | pmm              | 7 (4.5)       |
| 2     | HbA1c 6M                                    | Sex, Age, Pubertal stage, Presence of comorbidities, Time since diagnosis, HbA1c 3M                                                                                                                                                | pmm              | 20 (12.8)     |
| 3     | HbA1c 12M                                   | Sex, Age, Pubertal stage, Presence of comorbidities, Time since diagnosis, HbA1c 6M                                                                                                                                                | pmm              | 28 (17.9)     |
| 4     | BMI 6M                                      | Sex, Age, Pubertal stage, Presence of comorbidities, Time since diagnosis, BMI Baseline                                                                                                                                            | pmm              | 24 (15.4)     |
| 5     | BMI 12M                                     | Sex, Age, Pubertal stage, Presence of comorbidities, Time since diagnosis, BMI 6M                                                                                                                                                  | pmm              | 28 (17.9)     |
| 6     | N. ° severe hypoglycaemia events 3M         | Sex, Age, Pubertal stage, Presence of comorbidities, Time since diagnosis, N. ° severe hypoglycaemia events Baseline                                                                                                               | poisson          | 7 (4.5)       |
| 7     | N. ° severe hypoglycaemia events 6M         | Sex, Age, Pubertal stage, Presence of comorbidities, Time since diagnosis, N. ° severe hypoglycaemia events 3M                                                                                                                     | poisson          | 7 (4.5)       |
| 8     | N. ° severe hypoglycaemia events 12M        | Sex, Age, Pubertal stage, Presence of comorbidities, Time since diagnosis, N. ° severe hypoglycaemia events 6M                                                                                                                     | poisson          | 7 (4.5)       |
| 9     | N. ° severe hypoglycaemia events on EHR 3M  | Sex, Age, Pubertal stage, Presence of comorbidities, Time since diagnosis, N. ° severe hypoglycaemia events 3M, N. ° severe hypoglycaemia events on EHR Baseline                                                                   | poisson          | 8 (5.1)       |
| 10    | N. ° severe hypoglycaemia events on EHR 6M  | Sex, Age, Pubertal stage, Presence of comorbidities, Time since diagnosis, N. ° severe hypoglycaemia events 6M, N. ° severe hypoglycaemia events on EHR 3M                                                                         | poisson          | 28 (17.9)     |
| 11    | N. ° severe hypoglycaemia events on EHR 12M | Sex, Age, Pubertal stage, Presence of comorbidities, Time since diagnosis, N. ° severe hypoglycaemia events 12M, N. ° severe hypoglycaemia events on EHR 6M                                                                        | poisson          | 28 (17.9)     |
| 12    | VAS 12M                                     | Sex, Age, Pubertal stage, Presence of comorbidities, Time since diagnosis, Mobility EQ-5D-Y 12M, Self-care EQ-5D-Y 12M, Habitual activities EQ-5D-Y 12M, Pain/discomfort EQ-5D-Y 12M, Anxiety/depression EQ-5D-Y 12M, VAS Baseline | pmm              | 36 (23.1)     |
| 13    | Knowledge about Baseline                    | Sex, Age, Pubertal stage, Presence of comorbidities, Time since diagnosis, HbA1c Baseline, BMI Baseline                                                                                                                            | pmm              | 14 (9.0)      |
| 14    | Knowledge about 12M                         | Sex, Age, Pubertal stage, Presence of comorbidities, Time since diagnosis, HbA1c 12M, BMI 12M, Knowledge about Baseline                                                                                                            | pmm              | 48 (30.8)     |
| 15    | Hyperglycaemia DTSQ Baseline                | Sex, Age, Pubertal stage, Presence of comorbidities, Time since diagnosis, HbA1c Baseline, Knowledge about Baseline                                                                                                                | pmm              | 14 (9.0)      |
| 16    | Hyperglycaemia DTSQ 12M                     | Sex, Age, Pubertal stage, Presence of comorbidities, Time since diagnosis, HbA1c 12M, Knowledge about 12M, Hyperglycaemia DTSQ Baseline                                                                                            | pmm              | 48 (30.8)     |
| 17    | Hypoglycaemia DTSQ Baseline                 | Sex, Age, Pubertal stage, Presence of comorbidities, Time since diagnosis                                                                                                                                                          | pmm              | 14 (9.0)      |
| 18    | Hypoglycaemia DTSQ 12M                      | Sex, Age, Pubertal stage, Presence of comorbidities, Time since diagnosis, Hypoglycaemia DTSQ Baseline                                                                                                                             | pmm              | 48 (30.8)     |



|                                                                                                                                                                                                                                                                                                      |                                           |                                                                                                                                                                                                                                                                             |     |           |
|------------------------------------------------------------------------------------------------------------------------------------------------------------------------------------------------------------------------------------------------------------------------------------------------------|-------------------------------------------|-----------------------------------------------------------------------------------------------------------------------------------------------------------------------------------------------------------------------------------------------------------------------------|-----|-----------|
| 19                                                                                                                                                                                                                                                                                                   | Satisfaction with treatment DTSQ Baseline | Sex, Age, Pubertal stage, Presence of comorbidities, Time since diagnosis, N. <sup>o</sup> severe hypoglycaemia events Baseline, N. <sup>o</sup> severe hypoglycaemia events on EHR Baseline, Knowledge about Baseline, Hyperglycaemia DTSQ Baseline,                       | pmm | 14 (9.0)  |
| 20                                                                                                                                                                                                                                                                                                   | Satisfaction with treatment DTSQ 12M      | Sex, Age, Pubertal stage, Presence of comorbidities, Time since diagnosis, N. <sup>o</sup> severe hypoglycaemia events 12M, N. <sup>o</sup> severe hypoglycaemia events on EHR 12M, Knowledge about 12M, Hyperglycaemia DTSQ 12M, Satisfaction with treatment DTSQ Baseline | pmm | 48 (30.8) |
| 21                                                                                                                                                                                                                                                                                                   | N. <sup>o</sup> of daily scans 3M         | Sex, Age, Pubertal stage, Presence of comorbidities, Time since diagnosis, HbA1c 3M, BMI Baseline, N. <sup>o</sup> severe hypoglycaemia events 3M                                                                                                                           | pmm | 8 (5.1)   |
| 22                                                                                                                                                                                                                                                                                                   | N. <sup>o</sup> of daily scans 6M         | Sex, Age, Pubertal stage, Presence of comorbidities, Time since diagnosis, HbA1c 6M, BMI 6M, N. <sup>o</sup> severe hypoglycaemia events 6M, N. <sup>o</sup> of daily scans 3M                                                                                              | pmm | 19 (12.2) |
| 23                                                                                                                                                                                                                                                                                                   | N. <sup>o</sup> of daily scans 12M        | Sex, Age, Pubertal stage, Presence of comorbidities, Time since diagnosis, HbA1c 12M, BMI 12M, N. <sup>o</sup> severe hypoglycaemia events 12M, N. <sup>o</sup> of daily scans 6M                                                                                           | pmm | 28 (17.9) |
| 24                                                                                                                                                                                                                                                                                                   | Sensor usage time 3M                      | Sex, Age, Pubertal stage, Presence of comorbidities, Time since diagnosis, HbA1c 3M, N. <sup>o</sup> ketoacidosis 3M, N. <sup>o</sup> of daily scans 3M                                                                                                                     | pmm | 8 (5.1)   |
| 25                                                                                                                                                                                                                                                                                                   | Sensor usage time 6M                      | Sex, Age, Pubertal stage, Presence of comorbidities, Time since diagnosis, HbA1c 6M, N. <sup>o</sup> ketoacidosis 6M, N. <sup>o</sup> of daily scans 6M, Sensor usage time 3M                                                                                               | pmm | 19 (12.2) |
| 26                                                                                                                                                                                                                                                                                                   | Sensor usage time 12M                     | Sex, Age, Pubertal stage, Presence of comorbidities, Time since diagnosis, HbA1c 12M, N. <sup>o</sup> ketoacidosis 12M, N. <sup>o</sup> of daily scans 12M, Sensor usage time 6M                                                                                            | pmm | 28 (17.9) |
| 27                                                                                                                                                                                                                                                                                                   | N. <sup>o</sup> Sensors 3M                | Sex, Age, Pubertal stage, Presence of comorbidities, Time since diagnosis, N. <sup>o</sup> ketoacidosis 3M, Sensor usage time 3M                                                                                                                                            | pmm | 7 (4.5)   |
| 28                                                                                                                                                                                                                                                                                                   | N. <sup>o</sup> Sensors 6M                | Sex, Age, Pubertal stage, Presence of comorbidities, Time since diagnosis, N. <sup>o</sup> ketoacidosis 6M, Sensor usage time 6M, N. <sup>o</sup> Sensors 3M                                                                                                                | pmm | 19 (12.2) |
| 29                                                                                                                                                                                                                                                                                                   | N. <sup>o</sup> Sensors 12M               | Sex, Age, Pubertal stage, Presence of comorbidities, Time since diagnosis, N. <sup>o</sup> ketoacidosis 12M, Sensor usage time 12M, N. <sup>o</sup> Sensors 6M                                                                                                              | pmm | 28 (17.9) |
| DM = Diabetes Mellitus; T1DM = Type 1 Diabetes Mellitus; DTSQ = Diabetes Treatment Satisfaction Questionnaire; EQ-5D-Y = Health-related quality of life questionnaire; VAS = visual analogue scale; HbA1c = Glycated haemoglobin; EHR = Electronic Health Record; BMI = Body mass index; M = Months. |                                           |                                                                                                                                                                                                                                                                             |     |           |

### Appendix 3. Cost estimation

#### List of tables:

Table A1. Use of resources and unit costs

Table A2. Total annual cost per patient of the FSL flash glucose monitoring system (€2021)

Table A3. Average number of test strips and lancets per patient and total annual costs due to lost parent/caregiver productivity before and after FSL use.

For peer review only

|                                 | <b>Unit cost €2021 (SD)</b> | <b>Source</b>                            |
|---------------------------------|-----------------------------|------------------------------------------|
| Hospitalization /day            | 652.58 (188.86)             | Public tariff*                           |
| Visit to specialist             | 95.65 (33.98)               | Public tariff*                           |
| Visit to nurse at primary care  | 27.06 (7.52)                | Public tariff*                           |
| Hospital emergency              | 207.54 (72.03)              | Public tariff*                           |
| Visit to doctor at primary care | 50.91 (17.63)               | Public tariff*                           |
| Non-hospital emergency          | 99.41 (22.83)               | Public tariff*                           |
| HbA1c determination             | 7.15 (5.16)                 | Public tariff*                           |
| Test strips                     | 0.43 (0.15)                 | Consult*                                 |
| Lancets                         | 0.109 (0.11)                | Consult*                                 |
| FSL sensor device               | 43.27                       | Information provided by the manufacturer |
| Absenteeism day                 | 166.896                     | Estimate based on Eurostat and INE       |

FSL = FreeStyle Libre®; SD = Standard deviation.  
 \* Spanish autonomous communities.  
 INE = Spanish Statistical Office.

Unit costs come from different sources, all national, and include official tariffs. Where possible, the average costs of those Spanish regions for which data were available were taken into account  
 To estimate the unit cost of test strips and lancets, the Spanish regions were consulted for their spending on these products. There was great heterogeneity between regions, not only in the unit cost (between €0.10 and €0.48), but also in the products financed, since lancets are only financed in some regions.

**Table A2. Total annual cost per patient of the FSL flash glucose monitoring system (€2021)**

|             | <b>Primary care</b> | <b>Emergency</b>  | <b>Specialist</b>   | <b>Laboratory</b> | <b>Monitoring*</b>    | <b>Total costs</b>    |
|-------------|---------------------|-------------------|---------------------|-------------------|-----------------------|-----------------------|
| Mean (SD)   | 136.78 (101.28)     | 50.70<br>(161.66) | 415.48<br>(129.53)  | 29.05 (5.87)      | 1572.25<br>(317.58)   | 2204.26<br>(425.73)   |
| Min. – Max. | 0 – 474.24          | 0 – 1245.24       | 0 – 956.5           | 14.30 – 71.50     | 1125 – 2420.39        | 1344.90 –<br>3626.20  |
| 95%CI       | (119.88; 154.65)    | (25.74;<br>80.73) | (393.81;<br>438.65) | (28.1; 30.16)     | (1519.13;<br>1627.46) | (2131.33;<br>2278.01) |

95%CI = Confidence interval at 95% by Bootstrap based on 10,000 samples; Max. = Maximum; Min. = Minimum; SD = Standard Deviation  
 \*Including cost of test strips and lancets, and cost of sensor

**Table A3. Average number of test strips and lancets per patient and total annual costs due to lost parent/caregiver productivity before and after FSL use.**

|                                                                                                                                   | Before use of the flash glucose monitoring system | After use of the flash glucose monitoring system |
|-----------------------------------------------------------------------------------------------------------------------------------|---------------------------------------------------|--------------------------------------------------|
| <b>Average number of test strips and lancets per patient before and after use of the FSL device</b>                               |                                                   |                                                  |
| Yearly test strips, mean (SD)                                                                                                     | 2686.02 (527.63)                                  | 883.98 (669.45)                                  |
| Yearly Lancets, mean (SD)                                                                                                         | 1366.41 (1063.44)                                 | 615.94 (482.03)                                  |
| <b>Total annual cost per patient due to productivity losses (€2021)</b>                                                           |                                                   |                                                  |
| Mean (SD)                                                                                                                         | 545.67 (588.29)                                   | 262.73 (334.30)                                  |
| Min. – Max.                                                                                                                       | 0 – 3504.82                                       | 0 – 1668.96                                      |
| 95%CI                                                                                                                             | (448.55; 650.63)                                  | (206.65; 322.71)                                 |
| 95%CI = Confidence interval at 95% by Bootstrap based on 10,000 samples; Max. = Maximum; Min. = Minimum; SD = Standard deviation. |                                                   |                                                  |

#### Appendix 4. Evolution of outcome measures during follow-up (by age group and baseline HbA1c control)

|                                                                                          | Baseline    | 3 months    | 6 months    | 12 months   | Differences 12 months-Baseline (95%CI) |
|------------------------------------------------------------------------------------------|-------------|-------------|-------------|-------------|----------------------------------------|
| <b>HbA1c, mean (SD)</b>                                                                  |             |             |             |             |                                        |
| Total                                                                                    | 7.86 (1.36) | 7.58 (1.27) | 7.59 (1.16) | 7.73 (1.06) | -0.13 (-0.42; 0.16)                    |
| HbA1c <7.5%                                                                              | 6.82 (0.36) | 6.86 (0.55) | 6.96 (0.6)  | 7.14 (0.57) | 0.32 (0.15; 0.49)                      |
| HbA1c ≥7.5%                                                                              | 8.65 (1.31) | 8.18 (1.38) | 8.14 (1.25) | 8.2 (1.12)  | -0.45 (-0.84; -0.06)                   |
| <12 years                                                                                | 7.83 (1.17) | 7.42 (0.93) | 7.53 (0.96) | 7.57 (0.8)  | -0.26 (-0.59; 0.07)                    |
| ≥12 years                                                                                | 7.87 (1.45) | 7.66 (1.41) | 7.63 (1.26) | 7.82 (1.19) | -0.05 (-0.45; 0.35)                    |
| <b>With self-reported severe hypoglycaemia, n (%)</b>                                    |             |             |             |             |                                        |
| Total                                                                                    | 49 (31.4)   | -           | -           | 55 (36.9)   | 5.5% (-12.7; 23.7)                     |
| HbA1c <7.5%                                                                              | 26 (38.2)   | -           | -           | 24 (35.3)   | -2.9% (-29.6; 23.8)                    |
| HbA1c ≥7.5%                                                                              | 23 (26.1)   | -           | -           | 31 (38.3)   | 12.2% (-12.6; 37.0)                    |
| <12 years                                                                                | 22 (41.5)   | -           | -           | 19 (37.3)   | -4.2% (-34.1; 25.7)                    |
| ≥12 years                                                                                | 27 (26.2)   | -           | -           | 36 (36.7)   | 10.5% (-12.4; 33.4)                    |
| <b>Nº. Self-reported severe hypoglycaemia, mean (SD)</b>                                 |             |             |             |             |                                        |
| Total                                                                                    | 1.72 (3.65) | -           | -           | 1.77 (5.08) | 0.05 (-0.98; 1.1)                      |
| HbA1c <7.5%                                                                              | 2.34 (4.13) | -           | -           | 1.95 (5.69) | -0.39 (-2.2; 1.4)                      |
| HbA1c ≥7.5%                                                                              | 1.26 (3.19) | -           | -           | 1.63 (4.58) | 0.37 (-0.86; 1.6)                      |
| <12 years                                                                                | 2.12 (4.04) | -           | -           | 1.06 (3.65) | -1.06 (-2.6; 0.48)                     |
| ≥12 years                                                                                | 1.52 (3.43) | -           | -           | 2.20 (5.76) | 0.68 (-0.69; 2.1)                      |
| <b>With severe hypoglycaemia in the electronic clinical record, n (%)</b>                |             |             |             |             |                                        |
| Total                                                                                    | 19 (12.2)   | -           | -           | 23 (15.4)   | 3.2% (-17.6; 24.0)                     |
| HbA1c <7.5%                                                                              | 6 (8.8)     | -           | -           | 6 (8.8)     | 0% (-32.0; 32.0)                       |
| HbA1c ≥7.5%                                                                              | 13 (14.8)   | -           | -           | 17 (21.0)   | 6.2% (-21.1; 33.5)                     |
| <12 years                                                                                | 9 (17.0)    | -           | -           | 6 (11.8)    | -5.2% (-40.8; 30.4)                    |
| ≥12 years                                                                                | 10 (9.7)    | -           | -           | 17 (17.4)   | 7.7% (-0.18; 0.33)                     |
| <b>N.º Hypoglycaemia in the electronic clinical record prior to the study, mean (SD)</b> |             |             |             |             |                                        |
| Total                                                                                    | 0.39 (1.68) | -           | -           | 0.54 (1.58) | 0.15 (-0.23; 0.53)                     |
| HbA1c <7.5%                                                                              | 0.13 (0.45) | -           | -           | 0.25 (1.06) | 0.12 (-0.16; 0.40)                     |
| HbA1c ≥7.5%                                                                              | 0.59 (2.18) | -           | -           | 0.78 (1.88) | 0.19 (-0.43; 0.81)                     |
| <12 years                                                                                | 0.34 (1.02) | -           | -           | 0.61 (1.89) | 0.27 (-0.32; 0.86)                     |
| ≥12 years                                                                                | 0.42 (1.94) | -           | -           | 0.5 (1.40)  | 0.08 (-0.39; 0.55)                     |
| <b>Health-related quality of life (EQ-5D-Y)</b>                                          |             |             |             |             |                                        |
| <b>Mobility (no problems), n (%)</b>                                                     |             |             |             |             |                                        |
| Total                                                                                    | 156 (100)   | -           | -           | 124 (100)   | -                                      |
| HbA1c <7.5%                                                                              | 68 (100)    | -           | -           | 54 (100)    | -                                      |
| HbA1c ≥7.5%                                                                              | 88 (100)    | -           | -           | 70 (100)    | -                                      |
| <12 years                                                                                | 53 (100)    | -           | -           | 47 (100)    | -                                      |
| ≥12 years                                                                                | 103 (100)   | -           | -           | 77 (100)    | -                                      |
| <b>Self-Care (no problems), n (%)</b>                                                    |             |             |             |             |                                        |
| Total                                                                                    | 154 (98.7)  | -           | -           | 123 (99.2)  | -                                      |
| HbA1c <7.5%                                                                              | 67 (98.5)   | -           | -           | 54 (100)    | -                                      |
| HbA1c ≥7.5%                                                                              | 87 (98.9)   | -           | -           | 69 (98.6)   | -                                      |
| <12 years                                                                                | 51 (96.2)   | -           | -           | 47 (100)    | -                                      |
| ≥12 years                                                                                | 103 (100)   | -           | -           | 76 (98.7)   | -                                      |
| <b>Usual Activities (no problems), n (%)</b>                                             |             |             |             |             |                                        |
| Total                                                                                    | 154 (98.7)  | -           | -           | 122 (98.4)  | -                                      |
| HbA1c <7.5%                                                                              | 67 (98.5)   | -           | -           | 53 (98.1)   | -                                      |
| HbA1c ≥7.5%                                                                              | 87 (98.9)   | -           | -           | 69 (98.6)   | -                                      |
| <12 years                                                                                | 53 (100)    | -           | -           | 47 (100)    | -                                      |
| ≥12 years                                                                                | 101 (98.1)  | -           | -           | 75 (97.4)   | -                                      |
| <b>Pain or Discomfort (no pain), n (%)</b>                                               |             |             |             |             |                                        |

|                                                                                                |               |   |   |               |                     |
|------------------------------------------------------------------------------------------------|---------------|---|---|---------------|---------------------|
| Total                                                                                          | 144 (92.3)    | - | - | 118 (95.2)    | -                   |
| HbA1c <7.5%                                                                                    | 62 (91.2)     | - | - | 53 (98.1)     | -                   |
| HbA1c ≥7.5%                                                                                    | 82 (93.2)     | - | - | 65 (92.9)     | -                   |
| <12 years                                                                                      | 50 (94.3)     | - | - | 45 (95.7)     | -                   |
| ≥12 years                                                                                      | 94 (91.3)     | - | - | 73 (94.8)     | -                   |
| <b>Pain or Discomfort (some pain), n (%)</b>                                                   |               |   |   |               |                     |
| Total                                                                                          | 12 (7.7)      | - | - | 6 (4.8)       | -                   |
| HbA1c <7.5%                                                                                    | 6 (8.8)       | - | - | 1 (1.9)       | -                   |
| HbA1c ≥7.5%                                                                                    | 6 (6.8)       | - | - | 5 (7.1)       | -                   |
| <12 years                                                                                      | 3 (5.7)       | - | - | 2 (4.3)       | -                   |
| ≥12 years                                                                                      | 9 (8.7)       | - | - | 4 (5.2)       | -                   |
| <b>Anxiety/Depression (no problems), n (%)</b>                                                 |               |   |   |               |                     |
| Total                                                                                          | 137 (87.8)    | - | - | 112 (90.3)    | -                   |
| HbA1c <7.5%                                                                                    | 62 (91.2)     | - | - | 50 (92.6)     | -                   |
| HbA1c ≥7.5%                                                                                    | 75 (85.2)     | - | - | 62 (88.6)     | -                   |
| <12 years                                                                                      | 49 (92.5)     | - | - | 44 (93.6)     | -                   |
| ≥12 years                                                                                      | 88 (85.4)     | - | - | 68 (88.3)     | -                   |
| <b>Anxiety/Depression (some problems), n (%)</b>                                               |               |   |   |               |                     |
| Total                                                                                          | 16 (10.3)     | - | - | 10 (8.1)      | -                   |
| HbA1c <7.5%                                                                                    | 5 (7.4)       | - | - | 4 (7.4)       | -                   |
| HbA1c ≥7.5%                                                                                    | 11 (12.5)     | - | - | 6 (8.6)       | -                   |
| <12 years                                                                                      | 3 (5.7)       | - | - | 2 (4.3)       | -                   |
| ≥12 years                                                                                      | 13 (12.6)     | - | - | 8 (10.4)      | -                   |
| <b>VAS, mean (SD)</b>                                                                          |               |   |   |               |                     |
| Total                                                                                          | 87.63 (12.46) | - | - | 84.17 (12.28) | -3.5 (-6.4; -0.53)  |
| HbA1c <7.5%                                                                                    | 88.79 (10.05) | - | - | 87.92 (10.08) | 0.29 (-3.9; 4.5)    |
| HbA1c ≥7.5%                                                                                    | 86.74 (14.04) | - | - | 81.29 (16.29) | -7.5 (-11.7; -3.3)  |
| <12 years                                                                                      | 91.66 (9.72)  | - | - | 85.61 (14.97) | -6.1 (-11.0; -1.1)  |
| ≥12 years                                                                                      | 85.56 (13.23) | - | - | 83.27 (13.86) | -2.3 (-6.3; 1.7)    |
| <b>Knowledge of diabetes treatment (modified version of Mitchell questionnaire), mean (SD)</b> |               |   |   |               |                     |
| Total                                                                                          | 11.68 (2.13)  | - | - | 12.09 (1.94)  | 0.41 (-0.11; 0.93)  |
| HbA1c <7.5%                                                                                    | 12.38 (1.98)  | - | - | 12.92 (1.35)  | 0.54 (-0.11; 1.2)   |
| HbA1c ≥7.5%                                                                                    | 11.12 (2.08)  | - | - | 11.38 (2.08)  | 0.26 (-0.45; 0.97)  |
| <12 years                                                                                      | 11.87 (2.07)  | - | - | 11.9 (2.31)   | 0.03 (-0.90; 0.96)  |
| ≥12 years                                                                                      | 11.59 (2.16)  | - | - | 12.21 (1.67)  | 0.62 (-0.001; 1.2)  |
| <b>Diabetes Treatment Satisfaction Questionnaire (DTSQ)</b>                                    |               |   |   |               |                     |
| <b>Perceived hyperglycaemia, mean (SD)</b>                                                     |               |   |   |               |                     |
| Total                                                                                          | 3.53 (1.51)   | - | - | 3.32 (1.44)   | -0.21 (-0.58; 0.16) |
| HbA1c <7.5%                                                                                    | 2.94 (1.28)   | - | - | 2.88 (1.44)   | -0.06 (-0.57; 0.45) |
| HbA1c ≥7.5%                                                                                    | 4.01 (1.51)   | - | - | 3.71 (1.34)   | -0.3 (-0.79; 0.19)  |
| <12 years                                                                                      | 3.62 (1.38)   | - | - | 3.44 (1.48)   | -0.18 (-0.79; 0.43) |
| ≥12 years                                                                                      | 3.48 (1.57)   | - | - | 3.25 (1.42)   | -0.23 (-0.71; 0.25) |
| <b>Perceived hypoglycaemia, mean (SD)</b>                                                      |               |   |   |               |                     |
| Total                                                                                          | 2.22 (1.35)   | - | - | 2.04 (1.32)   | -0.18 (-0.52; 0.16) |
| HbA1c <7.5%                                                                                    | 2.3 (1.36)    | - | - | 2 (1.31)      | -0.3 (-0.80; 0.20)  |
| HbA1c ≥7.5%                                                                                    | 2.15 (1.35)   | - | - | 2.07 (1.34)   | -0.08 (-0.54; 0.38) |
| <12 years                                                                                      | 2.19 (1.17)   | - | - | 2.05 (1.26)   | -0.14 (-0.66; 0.38) |
| ≥12 years                                                                                      | 2.23 (1.44)   | - | - | 2.03 (1.36)   | -0.2 (-0.64; 0.24)  |
| <b>Satisfaction with treatment, mean (SD)</b>                                                  |               |   |   |               |                     |
| Total                                                                                          | 25.89 (6.7)   | - | - | 29.82 (5.44)  | 3.93 (2.4; 5.5)     |
| HbA1c <7.5%                                                                                    | 26.58 (7.04)  | - | - | 29.78 (5.1)   | 3.2 (0.86; 5.5)     |
| HbA1c ≥7.5%                                                                                    | 25.33 (6.41)  | - | - | 29.86 (5.77)  | 4.53 (2.4; 6.6)     |
| <12 years                                                                                      | 25.79 (6.71)  | - | - | 29.61 (5.87)  | 3.82 (1.1; 6.5)     |
| ≥12 years                                                                                      | 25.95 (6.73)  | - | - | 29.96 (5.21)  | 4.01 (2.1; 5.9)     |

|                                                                                                                   | Baseline | 3 months      | 6 months      | 12 months     | Differences 12-3 months (95%CI) |
|-------------------------------------------------------------------------------------------------------------------|----------|---------------|---------------|---------------|---------------------------------|
| <b>Sensor usage time (%), mean (SD)</b>                                                                           |          |               |               |               |                                 |
| Total                                                                                                             | -        | 81.60 (20.78) | 84.42 (19.47) | 88.55 (18.48) | 6.95 (2.3; 11.6)                |
| HbA1c <7.5%                                                                                                       | -        | 83.99 (21.93) | 86.60 (17.2)  | 91.70 (15.09) | 7.71 (0.90; 14.5)               |
| HbA1c ≥7.5%                                                                                                       | -        | 79.63 (19.69) | 82.57 (21.16) | 86.01 (20.57) | 6.38 (-0.8; 12.8)               |
| <12 years                                                                                                         | -        | 87.59 (15.06) | 90.60 (14.34) | 94.51 (11.81) | 6.92 (1.5; 12.3)                |
| ≥12 years                                                                                                         | -        | 78.45 (22.67) | 81.09 (21.07) | 84.85 (20.84) | 6.4 (-0.14; 12.9)               |
| <b>Number of scans per day, mean (SD)</b>                                                                         |          |               |               |               |                                 |
| Total                                                                                                             | -        | 9.16 (5.06)   | 9.33 (4.97)   | 9.84 (6.02)   | 0.68 (-0.64; 2.0)               |
| HbA1c <7.5%                                                                                                       | -        | 10.06 (5.11)  | 9.89 (5.07)   | 10.39 (5.45)  | 0.33 (-1.6; 2.2)                |
| HbA1c ≥7.5%                                                                                                       | -        | 8.41 (4.92)   | 8.85 (4.86)   | 9.39 (6.46)   | 0.98 (-0.87; 2.8)               |
| <12 years                                                                                                         | -        | 11.67 (5.64)  | 11.27 (4.5)   | 12.96 (6.45)  | 1.29 (-1.1; 3.7)                |
| ≥12 years                                                                                                         | -        | 7.83 (4.17)   | 8.27 (4.91)   | 7.90 (4.85)   | 0.07 (-1.3; 1.4)                |
| <b>Number of sensors used, mean (SD)</b>                                                                          |          |               |               |               |                                 |
| Total                                                                                                             | -        | 6.40 (1.36)   | 7.50 (2.86)   | 14.74 (5.81)  | 8.34 (7.4; 9.3)                 |
| HbA1c <7.5%                                                                                                       | -        | 6.32 (1.37)   | 6.86 (1.76)   | 13.35 (4.47)  | 7.03 (5.9; 8.2)                 |
| HbA1c ≥7.5%                                                                                                       | -        | 6.46 (1.36)   | 8.05 (3.46)   | 15.86 (6.51)  | 9.4 (7.9; 10.9)                 |
| <12 years                                                                                                         | -        | 6.63 (1.17)   | 6.90 (2.15)   | 14.73 (5.83)  | 8.1 (6.5; 7.8)                  |
| ≥12 years                                                                                                         | -        | 6.28 (1.44)   | 7.83 (3.15)   | 14.75 (5.83)  | 8.47 (7.3; 9.7)                 |
| SD = standard deviation; VAS = Visual Analogue Scale; HbA1c = Glycosylated Haemoglobin; CI = Confidence Interval. |          |               |               |               |                                 |

Appendix 5. Multivariate Mixed Regression Model for Effectiveness Measures and Adherence

**Table 1. Multivariate Mixed Regression Model for Effectiveness Measures**

| Variable                                                 | Self-reported severe hypoglycaemia events                    |      |                                                        |             | Severe hypoglycaemic events in the clinical history          |                 |                                                        |                 | Visual analogue scale (EQ-5D-Y) |                 |                      |                 |                      |                 | Knowledge of diabetes treatment |                 | Diabetes Treatment Satisfaction Questionnaire    |                 |                                                 |                 |                                                     |                 |  |
|----------------------------------------------------------|--------------------------------------------------------------|------|--------------------------------------------------------|-------------|--------------------------------------------------------------|-----------------|--------------------------------------------------------|-----------------|---------------------------------|-----------------|----------------------|-----------------|----------------------|-----------------|---------------------------------|-----------------|--------------------------------------------------|-----------------|-------------------------------------------------|-----------------|-----------------------------------------------------|-----------------|--|
|                                                          | Patients with hypoglycaemia (Yes/No)<br>Total sample (n=156) |      | Number of self-reported events<br>Total sample (n=156) |             | Patients with hypoglycaemia (Yes/No)<br>Total sample (n=156) |                 | Number of self-reported events<br>Total sample (n=156) |                 | Total sample (n=156)            |                 | HbA1c <7.5% (n=68)   |                 | HbA1c ≥7.5% (n=88)   |                 | Total sample (n=156)            |                 | Perceived hyperglycaemia<br>Total sample (n=156) |                 | Perceived hypoglycaemia<br>Total sample (n=156) |                 | Satisfaction with treatment<br>Total sample (n=156) |                 |  |
|                                                          | OR (95%CI)                                                   | P    | β (95%CI)                                              | P           | OR (95%CI)                                                   | P               | β (95%CI)                                              | P               | B (95%CI)                       | P               | B (95%CI)            | P               | B (95%CI)            | P               | B (95%CI)                       | P               | B (95%CI)                                        | P               | B (95%CI)                                       | P               | B (95%CI)                                           | P               |  |
| <b>Time</b>                                              |                                                              |      |                                                        |             |                                                              |                 |                                                        |                 |                                 |                 |                      |                 |                      |                 |                                 |                 |                                                  |                 |                                                 |                 |                                                     |                 |  |
| M12 (ref: M0)                                            | 0.82 (0.35; 1.96)                                            | .659 | -0.37 (-0.62; -0.11)                                   | <b>.004</b> | 1.47 (0.32; 6.77)                                            | .617            | 0.77 (-0.06; 1.60)                                     | .069            | -1.40 (-4.97; 2.16)             | .440            | -1.33 (-4.17; 1.51)  | .359            | -6.03 (-9.66; -2.41) | <b>.001</b>     | 0.45 (-0.17; 1.08)              | .154            | -0.08 (-0.50; 0.34)                              | .721            | -0.23 (-0.70; 0.24)                             | .331            | 3.11 (0.99; 5.23)                                   | <b>.004</b>     |  |
| <b>Duration of T1DM</b>                                  | 1.01 (0.89; 1.15)                                            | .850 | -0.01 (-0.14; 0.12)                                    | .922        | 0.97 (0.81; 1.18)                                            | .806            | -0.05 (-0.24; 0.14)                                    | .587            | -0.74 (-1.29; -0.19)            | <b>.008</b>     | -0.32 (-0.99; 0.35)  | .348            | -1.05 (-1.86; -0.24) | <b>.011</b>     | 0.01 (-0.08; 0.09)              | .851            | -0.003 (-0.06; 0.05)                             | .915            | -0.005 (-0.07; 0.06)                            | .870            | 0.05 (-0.18; 0.29)                                  | .650            |  |
| <b>Presence of comorbidities</b>                         | 0.81 (0.33; 1.98)                                            | .641 | 0.26 (-0.60; 1.12)                                     | .556        | 0.81 (0.26; 2.50)                                            | .710            | 0.27 (-0.83; 1.38)                                     | .624            | 0.87 (-2.91; 4.64)              | .652            | 2.42 (-1.78; 6.63)   | .259            | -1.04 (-6.98; 4.89)  | .731            | 0.02 (-0.52; 0.57)              | .930            | -0.005 (-0.43; 0.42)                             | .980            | 0.02 (-0.36; 0.41)                              | .91             | -0.52 (-2.15; 1.11)                                 | .534            |  |
| <b>Age group: ≥12 years</b> (ref: <12 years)             | 0.56 (0.22; 1.42)                                            | .221 | -0.15 (-1.04; 0.75)                                    | .745        | 1.32 (0.39; 4.44)                                            | .651            | 0.32 (-0.87; 1.50)                                     | .599            | -3.11 (-6.99; 0.78)             | .117            | -3.84 (-8.61; 0.94)  | .115            | -2.82 (-8.49; 2.83)  | .327            | -0.09 (-0.67; 0.48)             | .705            | -0.05 (0.48; 0.38)                               | .819            | -0.002 (-0.38; 0.37)                            | .99             | -0.02 (-3.24; 0.76)                                 | .980            |  |
| <b>Baseline HbA1c group: ≥7.5%</b> (ref: HbA1c <7.5%)    | 0.41 (0.15; 1.17)                                            | .097 | -0.57 (-1.40; 0.26)                                    | .176        | 2.17 (0.53; 8.88)                                            | .280            | 1.54 (0.31; 2.77)                                      | <b>.014</b>     | -1.93 (-5.98; 2.11)             | .349            |                      |                 |                      |                 | -1.27 (-1.89; -0.65)            | <b>&lt;.001</b> | 1.06 (0.60; 1.52)                                | <b>&lt;.001</b> | -0.12 (-0.57; 0.33)                             | .593            | -1.24 (-1.34; 4.22)                                 | .225            |  |
| <b>Time*Baseline HbA1c Group</b> (ref: M0 & HbA1c <7.5%) |                                                              |      |                                                        |             |                                                              |                 |                                                        |                 |                                 |                 |                      |                 |                      |                 |                                 |                 |                                                  |                 |                                                 |                 |                                                     |                 |  |
| M12 & HbA1c ≥7.5%                                        | 2.69 (0.81; 8.96)                                            | .108 | 0.30 (-0.08; 0.68)                                     | .117        | 2.01 (0.34; 11.68)                                           | .437            | -0.44 (-1.33; 0.45)                                    | .333            | -4.61 (-9.44; 0.21)             | <b>.061</b>     |                      |                 |                      |                 | -0.06 (-0.90; 0.78)             | .892            | -0.11 (-0.70; 0.48)                              | .703            | 0.16 (-0.46; 0.78)                              | .615            | 1.44 (-1.34; 4.22)                                  | .310            |  |
| <b>Intercept</b>                                         | 0.78 (0.27; 2.23)                                            | .641 | -0.78 (-1.74; 0.17)                                    | .107        | 0.03 (0.004; 0.19)                                           | <b>&lt;.001</b> | -4.32 (-5.97; -2.67)                                   | <b>&lt;.001</b> | 90.50 (86.13; 94.87)            | <b>&lt;.001</b> | 90.44 (85.92; 94.96) | <b>&lt;.001</b> | 88.92 (83.96; 93.88) | <b>&lt;.001</b> | 12.43 (11.78; 13.07)            | <b>&lt;.001</b> | 2.98 (2.49; 3.46)                                | <b>&lt;.001</b> | 2.29 (1.84; 2.74)                               | <b>&lt;.001</b> | 26.80 (24.80; 28.81)                                | <b>&lt;.001</b> |  |

CI = Confidence Interval; HbA1c = Glycosylated Haemoglobin; M = Months; OR = Odds Ratio; ref = reference.



1  
2  
3  
4  
5  
6  
7  
8  
9  
10  
11  
12  
13  
14  
15  
16  
17  
18  
19  
20  
21  
22  
23  
24  
25  
26  
27  
28  
29  
30  
31  
32  
33  
34  
35  
36  
37  
38  
39  
40  
41  
42  
43  
44  
45  
46

| Variable                                                    | Sensor usage time, %     |                 | Number of scans per day |                 | Number of sensors used |                 |                          |                 |                          |                 |
|-------------------------------------------------------------|--------------------------|-----------------|-------------------------|-----------------|------------------------|-----------------|--------------------------|-----------------|--------------------------|-----------------|
|                                                             | Total sample (n=156)     |                 | Total sample (n=156)    |                 | Total sample (n=156)   |                 | HbA1c basal <7.5% (n=68) |                 | HbA1c basal ≥7.5% (n=88) |                 |
|                                                             | B (95%CI)                | P               | B (95%CI)               | P               | B (95%CI)              | P               | B (95%CI)                | P               | B (95%CI)                | P               |
| <b>Time</b>                                                 |                          |                 |                         |                 |                        |                 |                          |                 |                          |                 |
| M6 (ref: M3)                                                | 1.82<br>(-3.31; 6.98)    | .487            | -0.25<br>(-1.41; 0.92)  | .678            | 0.49<br>(-0.58; 1.56)  | .367            | 0.51<br>(-0.37; 1.39)    | .255            | 1.59<br>(0.48; 2.70)     | <b>.005</b>     |
| M12 (ref: M3)                                               | 6.42<br>(1.12; 11.72)    | <b>.018</b>     | 0.30<br>(-0.91; 1.51)   | .625            | 6.96<br>(5.85; 8.06)   | <b>&lt;.001</b> | 6.97<br>(6.06; 7.87)     | <b>&lt;.001</b> | 9.37<br>(8.25; 10.50)    | <b>&lt;.001</b> |
| <b>Duration of T1DM</b>                                     | -1.02<br>(-1.77; -0.27)  | <b>.008</b>     | -0.08<br>(-0.29; 0.13)  | .468            | -0.06<br>(-0.20; 0.07) | .363            | -0.11<br>(-0.25; 0.04)   | .152            | -0.03<br>(-0.24; 0.18)   | .804            |
| <b>Presence of comorbidities</b>                            | 0.53<br>(-4.61; 5.66)    | .840            | -0.69<br>(-2.14; 0.75)  | .348            | -0.35<br>(-1.27; 0.56) | .453            | -0.25<br>(-1.16; 0.66)   | .585            | -0.39<br>(-1.92; 1.14)   | .617            |
| <b>Age group: ≥12 years</b><br>(ref: <12 years)             | -7.93<br>(-13.19; -2.66) | <b>.003</b>     | -3.92<br>(-5.40; -2.43) | <b>&lt;.001</b> | 0.39<br>(-0.55; 1.33)  | .417            | 0.03<br>(-0.98; 1.05)    | .952            | 0.69<br>(-0.77; 2.14)    | .354            |
| <b>Baseline HbA1c group: ≥7.5%</b><br>(ref: HbA1c <7.5%)    | -4.59<br>(-10.71; 1.53)  | .142            | -1.92<br>(-3.52; -0.31) | <b>.019</b>     | 0.12<br>(-1.04; 1.29)  | .836            |                          |                 |                          |                 |
| <b>Time*Baseline HbA1c Group</b><br>(ref: M3 & HbA1c <7.5%) |                          |                 |                         |                 |                        |                 |                          |                 |                          |                 |
| M6 & HbA1c ≥7.5%                                            | 0.38<br>(-6.58; 7.33)    | .915            | 0.43<br>(-1.14; 2.01)   | .590            | 1.09<br>(-0.36; 2.54)  | .141            |                          |                 |                          |                 |
| M12 & HbA1c ≥7.5%                                           | -1.35<br>(-8.48; 5.77)   | .710            | 0.35<br>(-1.28; 1.97)   | .676            | 2.41<br>(0.93; 3.90)   | <b>.001</b>     |                          |                 |                          |                 |
| <b>Intercept</b>                                            | 89.10<br>(82.9; 95.3)    | <b>&lt;.001</b> | 13.0<br>(11.32; 14.68)  | <b>&lt;.001</b> | 6.19<br>(5.04; 7.33)   | <b>&lt;.001</b> | 6.39<br>(5.34; 7.44)     | <b>&lt;.001</b> | 6.13<br>(4.77; 7.49)     | <b>&lt;.001</b> |

CI = Confidence Interval; HbA1c = Glycosylated Haemoglobin; M = Months; ref = reference.

STROBE Statement—Checklist of items that should be included in reports of *cohort studies*

|                              | Item No | Recommendation                                                                                                                                                                                                                                                                                                         | Page No                        |
|------------------------------|---------|------------------------------------------------------------------------------------------------------------------------------------------------------------------------------------------------------------------------------------------------------------------------------------------------------------------------|--------------------------------|
| <b>Title and abstract</b>    | 1       | (a) Indicate the study's design with a commonly used term in the title or the abstract<br>(b) Provide in the abstract an informative and balanced summary of what was done and what was found                                                                                                                          | 1<br>1                         |
| <b>Introduction</b>          |         |                                                                                                                                                                                                                                                                                                                        |                                |
| Background/rationale         | 2       | Explain the scientific background and rationale for the investigation being reported                                                                                                                                                                                                                                   | 3                              |
| Objectives                   | 3       | State specific objectives, including any prespecified hypotheses                                                                                                                                                                                                                                                       | 3                              |
| <b>Methods</b>               |         |                                                                                                                                                                                                                                                                                                                        |                                |
| Study design                 | 4       | Present key elements of study design early in the paper                                                                                                                                                                                                                                                                | 4                              |
| Setting                      | 5       | Describe the setting, locations, and relevant dates, including periods of recruitment, exposure, follow-up, and data collection                                                                                                                                                                                        | 4                              |
| Participants                 | 6       | (a) Give the eligibility criteria, and the sources and methods of selection of participants. Describe methods of follow-up<br>(b) For matched studies, give matching criteria and number of exposed and unexposed                                                                                                      | 4                              |
| Variables                    | 7       | Clearly define all outcomes, exposures, predictors, potential confounders, and effect modifiers. Give diagnostic criteria, if applicable                                                                                                                                                                               | 4-5                            |
| Data sources/<br>measurement | 8*      | For each variable of interest, give sources of data and details of methods of assessment (measurement). Describe comparability of assessment methods if there is more than one group                                                                                                                                   | 5                              |
| Bias                         | 9       | Describe any efforts to address potential sources of bias                                                                                                                                                                                                                                                              | 5                              |
| Study size                   | 10      | Explain how the study size was arrived at                                                                                                                                                                                                                                                                              | 5                              |
| Quantitative variables       | 11      | Explain how quantitative variables were handled in the analyses. If applicable, describe which groupings were chosen and why                                                                                                                                                                                           |                                |
| Statistical methods          | 12      | (a) Describe all statistical methods, including those used to control for confounding<br>(b) Describe any methods used to examine subgroups and interactions<br>(c) Explain how missing data were addressed<br>(d) If applicable, explain how loss to follow-up was addressed<br>(e) Describe any sensitivity analyses | 5-6<br>5-6<br>5-6<br>5-6<br>NA |
| <b>Results</b>               |         |                                                                                                                                                                                                                                                                                                                        |                                |
| Participants                 | 13*     | (a) Report numbers of individuals at each stage of study—eg numbers potentially eligible, examined for eligibility, confirmed eligible, included in the study, completing follow-up, and analysed<br>(b) Give reasons for non-participation at each stage<br>(c) Consider use of a flow diagram                        | 7<br>7<br>7                    |
| Descriptive data             | 14*     | (a) Give characteristics of study participants (eg demographic, clinical, social) and information on exposures and potential confounders<br>(b) Indicate number of participants with missing data for each variable of interest<br>(c) Summarise follow-up time (eg, average and total amount)                         | 7<br>Apex 1<br>7               |
| Outcome data                 | 15*     | Report numbers of outcome events or summary measures over time                                                                                                                                                                                                                                                         | 8                              |

|    |                          |    |                                                                                                                                                                                                              |       |
|----|--------------------------|----|--------------------------------------------------------------------------------------------------------------------------------------------------------------------------------------------------------------|-------|
| 1  | Main results             | 16 | (a) Give unadjusted estimates and, if applicable, confounder-adjusted estimates and their precision (eg, 95% confidence interval). Make clear which confounders were adjusted for and why they were included | 8     |
| 2  |                          |    | (b) Report category boundaries when continuous variables were categorized                                                                                                                                    | 8     |
| 3  |                          |    | (c) If relevant, consider translating estimates of relative risk into absolute risk for a meaningful time period                                                                                             | NA    |
| 4  |                          |    |                                                                                                                                                                                                              |       |
| 5  |                          |    |                                                                                                                                                                                                              |       |
| 6  |                          |    |                                                                                                                                                                                                              |       |
| 7  |                          |    |                                                                                                                                                                                                              |       |
| 8  |                          |    |                                                                                                                                                                                                              |       |
| 9  | Other analyses           | 17 | Report other analyses done—eg analyses of subgroups and interactions, and sensitivity analyses                                                                                                               | 9     |
| 10 |                          |    |                                                                                                                                                                                                              |       |
| 11 |                          |    |                                                                                                                                                                                                              |       |
| 12 | <b>Discussion</b>        |    |                                                                                                                                                                                                              |       |
| 13 | Key results              | 18 | Summarise key results with reference to study objectives                                                                                                                                                     | 10-11 |
| 14 |                          |    |                                                                                                                                                                                                              |       |
| 15 | Limitations              | 19 | Discuss limitations of the study, taking into account sources of potential bias or imprecision. Discuss both direction and magnitude of any potential bias                                                   | 10-11 |
| 16 |                          |    |                                                                                                                                                                                                              |       |
| 17 | Interpretation           | 20 | Give a cautious overall interpretation of results considering objectives, limitations, multiplicity of analyses, results from similar studies, and other relevant evidence                                   | 10-11 |
| 18 |                          |    |                                                                                                                                                                                                              |       |
| 19 |                          |    |                                                                                                                                                                                                              |       |
| 20 | Generalisability         | 21 | Discuss the generalisability (external validity) of the study results                                                                                                                                        | 10-11 |
| 21 |                          |    |                                                                                                                                                                                                              |       |
| 22 | <b>Other information</b> |    |                                                                                                                                                                                                              |       |
| 23 | Funding                  | 22 | Give the source of funding and the role of the funders for the present study and, if applicable, for the original study on which the present article is based                                                | 15    |
| 24 |                          |    |                                                                                                                                                                                                              |       |
| 25 |                          |    |                                                                                                                                                                                                              |       |

\*Give information separately for exposed and unexposed groups.

**Note:** An Explanation and Elaboration article discusses each checklist item and gives methodological background and published examples of transparent reporting. The STROBE checklist is best used in conjunction with this article (freely available on the Web sites of PLoS Medicine at <http://www.plosmedicine.org/>, Annals of Internal Medicine at <http://www.annals.org/>, and Epidemiology at <http://www.epidem.com/>). Information on the STROBE Initiative is available at <http://www.strobe-statement.org>.
