# Supplementary material for: Effectiveness, safety and costs of the FreeStyle Libre glucose monitoring system for children and adolescents with type 1 diabetes in Spain: a prospective, uncontrolled, pre-post study
Source: PubMed Central journal article supplement — BMJ Open. 2023 Dec 13;13(12):e071334. doi: 10.1136/bmjopen-2022-071334 (PMC10729222; doi:10.1136/bmjopen-2022-071334), 2023-12-13
Supplement: bmjopen-2022-071334supp001.pdf [file bmjopen-2022-071334supp001.pdf]

**Appendix 1. Participating hospitals and cases included in the study**

| Public hospitals                         | Regional Health Services | Number of patients |
|------------------------------------------|--------------------------|--------------------|
| Virgen Macarena University Hospital*     | Andalucía                | 2                  |
| Central de Asturias University Hospital* | Asturias                 | 4                  |
| Vall D'hebron University Hospital*       | Cataluña                 | 22                 |
| Badajoz University Hospital              | Extremadura              | 30                 |
| A Coruña University Hospital Complex*    | Galicia                  | 23                 |
| Ourense University Hospital Complex      | Galicia                  | 14                 |
| Barbanza Hospital                        | Galicia                  | 5                  |
| Calahorra Hospital Foundation            | La Rioja                 | 1                  |
| San Pedro Hospital                       | La Rioja                 | 13                 |
| Severo Ochoa Hospital                    | Madrid                   | 21                 |
| 12 De Octubre University Hospital*       | Madrid                   | 4                  |
| La Paz University Hospital*              | Madrid                   | 16                 |
| Dr. Peset Aleixandre University Hospital | Valencia                 | 1                  |
| *Tertiary hospital                       |                          |                    |
