# Supplementary material for: Effectiveness, safety and costs of the FreeStyle Libre glucose monitoring system for children and adolescents with type 1 diabetes in Spain: a prospective, uncontrolled, pre-post study
Source: PubMed Central journal article supplement — BMJ Open. 2023 Dec 13;13(12):e071334. doi: 10.1136/bmjopen-2022-071334 (PMC10729222; doi:10.1136/bmjopen-2022-071334), 2023-12-13
Supplement: bmjopen-2022-071334supp002.pdf [file bmjopen-2022-071334supp002.pdf]

## Appendix 2. Comparability analysis and description of the missing data imputation model

### Comparability analysis

For comparability analysis, the baseline characteristics of patients (gender, age, HbA1c, BMI, time since diagnosis, presence of comorbidities, and pubertal stage) were compared between participants who completed the different follow-up phases and those who had total or partial loss to follow-up at 3, 6, and 12 months. No significant differences were found for any of these variables at the 3-month follow-up. At 6 months, significant differences were observed between responders and non-responders in relation to pubertal stage V (25% vs. 75%) ( $p = 0.04$ ). At the 12-month follow-up, differences were observed in pubertal stages IV (21.7% vs. 78.3%) and V (31.2% vs. 68.8%) ( $p = 0.007$ ); significant differences were also observed in the mean age value ( $p = 0.04$ ) between responders (12.3 years) and non-responders (13.7 years).

|                                  | 3 months                             |                                                 |       | 6 months                              |                                                 |              | 12 months                             |                                                 |              |
|----------------------------------|--------------------------------------|-------------------------------------------------|-------|---------------------------------------|-------------------------------------------------|--------------|---------------------------------------|-------------------------------------------------|--------------|
|                                  | Participants lost to follow-up (n=6) | Participants who continued in the study (n=150) | p     | Participants lost to follow-up (n=20) | Participants who continued in the study (n=136) | p            | Participants lost to follow-up (n=28) | Participants who continued in the study (n=128) | p            |
| Sex (male), n (%)                | 4 (4.7)                              | 82 (95.3)                                       | 0.562 | 8 (9.3)                               | 78 (90.7)                                       | 0.145        | 16 (18.6)                             | 70 (81.4)                                       | 0.813        |
| Age (years), mean (SD)           | 13 (4.86)                            | 12.55 (3.09)                                    | 0.829 | 13.3 (3.81)                           | 12.46 (3.05)                                    | 0.266        | 13.68 (2.91)                          | 12.32 (3.17)                                    | <b>0.039</b> |
| HbA1c, mean (SD)                 | 8.42 (0.62)                          | 7.83 (1.38)                                     | 0.303 | 8.36 (2.01)                           | 7.78 (1.23)                                     | 0.224        | 8.08 (1.81)                           | 7.81 (1.24)                                     | 0.33         |
| BMI, mean (SD)                   | 20.73 (2.87)                         | 20.28 (4.10)                                    | 0.789 | 21.33 (2.91)                          | 20.14 (4.18)                                    | 0.224        | 21.33 (2.88)                          | 20.07 (4.24)                                    | 0.135        |
| Duration of DM1, mean (SD)       | 7.19 (3.86)                          | 5.59 (3.37)                                     | 0.257 | 6.42 (3.43)                           | 5.54 (3.38)                                     | 0.275        | 6.74 (3.39)                           | 5.41 (3.36)                                     | 0.061        |
| Presence of comorbidities, n (%) | 1 (2.0)                              | 49 (98.0)                                       | 0.41  | 7 (14)                                | 43 (86)                                         | 0.762        | 9 (18)                                | 41 (82)                                         | 0.991        |
| Pubertal status, n (%)           |                                      |                                                 | 0.473 |                                       |                                                 | <b>0.043</b> |                                       |                                                 | <b>0.007</b> |
| I                                | 2 (3.9)                              | 49 (96.1)                                       |       | 5 (9.8)                               | 46 (90.2)                                       |              | 5 (9.8)                               | 46 (90.2)                                       |              |
| II                               | 0 (0)                                | 14 (100)                                        |       | 1 (7.1)                               | 13 (92.9)                                       |              | 3 (21.4)                              | 11 (78.6)                                       |              |
| III                              | 0 (0)                                | 20 (100)                                        |       | 0 (0)                                 | 20 (100)                                        |              | 0 (0)                                 | 20 (100)                                        |              |
| IV                               | 0 (0)                                | 23 (100)                                        |       | 2 (8.7)                               | 21 (91.3)                                       |              | 5 (21.7)                              | 18 (78.3)                                       |              |
| V                                | 4 (8.3)                              | 44 (91.7)                                       |       | 12 (25)                               | 36 (75)                                         |              | 15 (31.2)                             | 33 (68.8)                                       |              |

SD = Standard deviation; HbA1c = Glycated haemoglobin; BMI = Body mass index.

### Description of the missing data imputation model

For multiple imputation was performed by chained equations using Stata 15.0 software. The variables sex, age, pubertal stage, presence of comorbidities and duration of diabetes were considered regular and used as predictors for imputation. A total of 29 variables were imputed. Each variable was imputed in chronological order: 3, 6 and 12 months. As a general rule, the latest available information on the variable to be imputed was used. When information from other variables was used, the information from the same point in time was used. A total of 10 imputations were made for each missing data.

| Order | Imputed variable                            | Variables used in imputation                                                                                                                                                                                                       | Imputation model | n (%) missing |
|-------|---------------------------------------------|------------------------------------------------------------------------------------------------------------------------------------------------------------------------------------------------------------------------------------|------------------|---------------|
| 1     | HbA1c 3M                                    | Sex, Age, Pubertal stage, Presence of comorbidities, Time since diagnosis, HbA1c Baseline                                                                                                                                          | pmm              | 7 (4.5)       |
| 2     | HbA1c 6M                                    | Sex, Age, Pubertal stage, Presence of comorbidities, Time since diagnosis, HbA1c 3M                                                                                                                                                | pmm              | 20 (12.8)     |
| 3     | HbA1c 12M                                   | Sex, Age, Pubertal stage, Presence of comorbidities, Time since diagnosis, HbA1c 6M                                                                                                                                                | pmm              | 28 (17.9)     |
| 4     | BMI 6M                                      | Sex, Age, Pubertal stage, Presence of comorbidities, Time since diagnosis, BMI Baseline                                                                                                                                            | pmm              | 24 (15.4)     |
| 5     | BMI 12M                                     | Sex, Age, Pubertal stage, Presence of comorbidities, Time since diagnosis, BMI 6M                                                                                                                                                  | pmm              | 28 (17.9)     |
| 6     | N. ° severe hypoglycaemia events 3M         | Sex, Age, Pubertal stage, Presence of comorbidities, Time since diagnosis, N. ° severe hypoglycaemia events Baseline                                                                                                               | poisson          | 7 (4.5)       |
| 7     | N. ° severe hypoglycaemia events 6M         | Sex, Age, Pubertal stage, Presence of comorbidities, Time since diagnosis, N. ° severe hypoglycaemia events 3M                                                                                                                     | poisson          | 7 (4.5)       |
| 8     | N. ° severe hypoglycaemia events 12M        | Sex, Age, Pubertal stage, Presence of comorbidities, Time since diagnosis, N. ° severe hypoglycaemia events 6M                                                                                                                     | poisson          | 7 (4.5)       |
| 9     | N. ° severe hypoglycaemia events on EHR 3M  | Sex, Age, Pubertal stage, Presence of comorbidities, Time since diagnosis, N. ° severe hypoglycaemia events 3M, N. ° severe hypoglycaemia events on EHR Baseline                                                                   | poisson          | 8 (5.1)       |
| 10    | N. ° severe hypoglycaemia events on EHR 6M  | Sex, Age, Pubertal stage, Presence of comorbidities, Time since diagnosis, N. ° severe hypoglycaemia events 6M, N. ° severe hypoglycaemia events on EHR 3M                                                                         | poisson          | 28 (17.9)     |
| 11    | N. ° severe hypoglycaemia events on EHR 12M | Sex, Age, Pubertal stage, Presence of comorbidities, Time since diagnosis, N. ° severe hypoglycaemia events 12M, N. ° severe hypoglycaemia events on EHR 6M                                                                        | poisson          | 28 (17.9)     |
| 12    | VAS 12M                                     | Sex, Age, Pubertal stage, Presence of comorbidities, Time since diagnosis, Mobility EQ-5D-Y 12M, Self-care EQ-5D-Y 12M, Habitual activities EQ-5D-Y 12M, Pain/discomfort EQ-5D-Y 12M, Anxiety/depression EQ-5D-Y 12M, VAS Baseline | pmm              | 36 (23.1)     |
| 13    | Knowledge about Baseline                    | Sex, Age, Pubertal stage, Presence of comorbidities, Time since diagnosis, HbA1c Baseline, BMI Baseline                                                                                                                            | pmm              | 14 (9.0)      |
| 14    | Knowledge about 12M                         | Sex, Age, Pubertal stage, Presence of comorbidities, Time since diagnosis, HbA1c 12M, BMI 12M, Knowledge about Baseline                                                                                                            | pmm              | 48 (30.8)     |
| 15    | Hyperglycaemia DTSQ Baseline                | Sex, Age, Pubertal stage, Presence of comorbidities, Time since diagnosis, HbA1c Baseline, Knowledge about Baseline                                                                                                                | pmm              | 14 (9.0)      |
| 16    | Hyperglycaemia DTSQ 12M                     | Sex, Age, Pubertal stage, Presence of comorbidities, Time since diagnosis, HbA1c 12M, Knowledge about 12M, Hyperglycaemia DTSQ Baseline                                                                                            | pmm              | 48 (30.8)     |
| 17    | Hypoglycaemia DTSQ Baseline                 | Sex, Age, Pubertal stage, Presence of comorbidities, Time since diagnosis                                                                                                                                                          | pmm              | 14 (9.0)      |
| 18    | Hypoglycaemia DTSQ 12M                      | Sex, Age, Pubertal stage, Presence of comorbidities, Time since diagnosis, Hypoglycaemia DTSQ Baseline                                                                                                                             | pmm              | 48 (30.8)     |

|                                                                                                                                                                                                                                                                                                      |                                           |                                                                                                                                                                                                                                                       |     |           |
|------------------------------------------------------------------------------------------------------------------------------------------------------------------------------------------------------------------------------------------------------------------------------------------------------|-------------------------------------------|-------------------------------------------------------------------------------------------------------------------------------------------------------------------------------------------------------------------------------------------------------|-----|-----------|
| 19                                                                                                                                                                                                                                                                                                   | Satisfaction with treatment DTSQ Baseline | Sex, Age, Pubertal stage, Presence of comorbidities, Time since diagnosis, N. ° severe hypoglycaemia events Baseline, N. ° severe hypoglycaemia events on EHR Baseline, Knowledge about Baseline, Hyperglycaemia DTSQ Baseline,                       | pmm | 14 (9.0)  |
| 20                                                                                                                                                                                                                                                                                                   | Satisfaction with treatment DTSQ 12M      | Sex, Age, Pubertal stage, Presence of comorbidities, Time since diagnosis, N. ° severe hypoglycaemia events 12M, N. ° severe hypoglycaemia events on EHR 12M, Knowledge about 12M, Hyperglycaemia DTSQ 12M, Satisfaction with treatment DTSQ Baseline | pmm | 48 (30.8) |
| 21                                                                                                                                                                                                                                                                                                   | N. ° of daily scans 3M                    | Sex, Age, Pubertal stage, Presence of comorbidities, Time since diagnosis, HbA1c 3M, BMI Baseline, N. ° severe hypoglycaemia events 3M                                                                                                                | pmm | 8 (5.1)   |
| 22                                                                                                                                                                                                                                                                                                   | N. ° of daily scans 6M                    | Sex, Age, Pubertal stage, Presence of comorbidities, Time since diagnosis, HbA1c 6M, BMI 6M, N. ° severe hypoglycaemia events 6M, N. ° of daily scans 3M                                                                                              | pmm | 19 (12.2) |
| 23                                                                                                                                                                                                                                                                                                   | N. ° of daily scans 12M                   | Sex, Age, Pubertal stage, Presence of comorbidities, Time since diagnosis, HbA1c 12M, BMI 12M, N. ° severe hypoglycaemia events 12M, N. ° of daily scans 6M                                                                                           | pmm | 28 (17.9) |
| 24                                                                                                                                                                                                                                                                                                   | Sensor usage time 3M                      | Sex, Age, Pubertal stage, Presence of comorbidities, Time since diagnosis, HbA1c 3M, N. ° ketoacidosis 3M, N. ° of daily scans 3M                                                                                                                     | pmm | 8 (5.1)   |
| 25                                                                                                                                                                                                                                                                                                   | Sensor usage time 6M                      | Sex, Age, Pubertal stage, Presence of comorbidities, Time since diagnosis, HbA1c 6M, N. ° ketoacidosis 6M, N. ° of daily scans 6M, Sensor usage time 3M                                                                                               | pmm | 19 (12.2) |
| 26                                                                                                                                                                                                                                                                                                   | Sensor usage time 12M                     | Sex, Age, Pubertal stage, Presence of comorbidities, Time since diagnosis, HbA1c 12M, N. ° ketoacidosis 12M, N. ° of daily scans 12M, Sensor usage time 6M                                                                                            | pmm | 28 (17.9) |
| 27                                                                                                                                                                                                                                                                                                   | N. ° Sensors 3M                           | Sex, Age, Pubertal stage, Presence of comorbidities, Time since diagnosis, N. ° ketoacidosis 3M, Sensor usage time 3M                                                                                                                                 | pmm | 7 (4.5)   |
| 28                                                                                                                                                                                                                                                                                                   | N. ° Sensors 6M                           | Sex, Age, Pubertal stage, Presence of comorbidities, Time since diagnosis, N. ° ketoacidosis 6M, Sensor usage time 6M, N. ° Sensors 3M                                                                                                                | pmm | 19 (12.2) |
| 29                                                                                                                                                                                                                                                                                                   | N. ° Sensors 12M                          | Sex, Age, Pubertal stage, Presence of comorbidities, Time since diagnosis, N. ° ketoacidosis 12M, Sensor usage time 12M, N. ° Sensors 6M                                                                                                              | pmm | 28 (17.9) |
| DM = Diabetes Mellitus; T1DM = Type 1 Diabetes Mellitus; DTSQ = Diabetes Treatment Satisfaction Questionnaire; EQ-5D-Y = Health-related quality of life questionnaire; VAS = visual analogue scale; HbA1c = Glycated haemoglobin; EHR = Electronic Health Record; BMI = Body mass index; M = Months. |                                           |                                                                                                                                                                                                                                                       |     |           |
