# Supplementary material for: Effectiveness, safety and costs of the FreeStyle Libre glucose monitoring system for children and adolescents with type 1 diabetes in Spain: a prospective, uncontrolled, pre-post study
Source: PubMed Central journal article supplement — BMJ Open. 2023 Dec 13;13(12):e071334. doi: 10.1136/bmjopen-2022-071334 (PMC10729222; doi:10.1136/bmjopen-2022-071334), 2023-12-13
Supplement: bmjopen-2022-071334supp003.pdf [file bmjopen-2022-071334supp003.pdf]

### Appendix 3. Cost estimation

#### List of tables:

Table A1. Use of resources and unit costs

Table A2. Total annual cost per patient of the FSL flash glucose monitoring system (€2021)

Table A3. Average number of test strips and lancets per patient and total annual costs due to lost parent/caregiver productivity before and after FSL use.

|                                 | <b>Unit cost €2021 (SD)</b> | <b>Source</b>                            |
|---------------------------------|-----------------------------|------------------------------------------|
| Hospitalization /day            | 652.58 (188.86)             | Public tariff*                           |
| Visit to specialist             | 95.65 (33.98)               | Public tariff*                           |
| Visit to nurse at primary care  | 27.06 (7.52)                | Public tariff*                           |
| Hospital emergency              | 207.54 (72.03)              | Public tariff*                           |
| Visit to doctor at primary care | 50.91 (17.63)               | Public tariff*                           |
| Non-hospital emergency          | 99.41 (22.83)               | Public tariff*                           |
| HbA1c determination             | 7.15 (5.16)                 | Public tariff*                           |
| Test strips                     | 0.43 (0.15)                 | Consult*                                 |
| Lancets                         | 0.109 (0.11)                | Consult*                                 |
| FSL sensor device               | 43.27                       | Information provided by the manufacturer |
| Absenteeism day                 | 166.896                     | Estimate based on Eurostat and INE       |

FSL = FreeStyle Libre®; SD = Standard deviation.  
 \* Spanish autonomous communities.  
 INE = Spanish Statistical Office.  
 Unit costs come from different sources, all national, and include official tariffs. Where possible, the average costs of those Spanish regions for which data were available were taken into account  
 To estimate the unit cost of test strips and lancets, the Spanish regions were consulted for their spending on these products. There was great heterogeneity between regions, not only in the unit cost (between €0.10 and €0.48), but also in the products financed, since lancets are only financed in some regions.

**Table A2. Total annual cost per patient of the FSL flash glucose monitoring system (€2021)**

|             | <b>Primary care</b> | <b>Emergency</b>  | <b>Specialist</b>   | <b>Laboratory</b> | <b>Monitoring*</b>    | <b>Total costs</b>    |
|-------------|---------------------|-------------------|---------------------|-------------------|-----------------------|-----------------------|
| Mean (SD)   | 136.78 (101.28)     | 50.70<br>(161.66) | 415.48<br>(129.53)  | 29.05 (5.87)      | 1572.25<br>(317.58)   | 2204.26<br>(425.73)   |
| Min. – Max. | 0 – 474.24          | 0 – 1245.24       | 0 – 956.5           | 14.30 – 71.50     | 1125 – 2420.39        | 1344.90 –<br>3626.20  |
| 95%CI       | (119.88; 154.65)    | (25.74;<br>80.73) | (393.81;<br>438.65) | (28.1; 30.16)     | (1519.13;<br>1627.46) | (2131.33;<br>2278.01) |

95%CI = Confidence interval at 95% by Bootstrap based on 10,000 samples; Max. = Maximum; Min. = Minimum; SD = Standard Deviation  
 \*Including cost of test strips and lancets, and cost of sensor

**Table A3. Average number of test strips and lancets per patient and total annual costs due to lost parent/caregiver productivity before and after FSL use.**

|                                                                                                                                   | Before use of the flash glucose monitoring system | After use of the flash glucose monitoring system |
|-----------------------------------------------------------------------------------------------------------------------------------|---------------------------------------------------|--------------------------------------------------|
| <b>Average number of test strips and lancets per patient before and after use of the FSL device</b>                               |                                                   |                                                  |
| Yearly test strips, mean (SD)                                                                                                     | 2686.02 (527.63)                                  | 883.98 (669.45)                                  |
| Yearly Lancets, mean (SD)                                                                                                         | 1366.41 (1063.44)                                 | 615.94 (482.03)                                  |
| <b>Total annual cost per patient due to productivity losses (€2021)</b>                                                           |                                                   |                                                  |
| Mean (SD)                                                                                                                         | 545.67 (588.29)                                   | 262.73 (334.30)                                  |
| Min. – Max.                                                                                                                       | 0 – 3504.82                                       | 0 – 1668.96                                      |
| 95%CI                                                                                                                             | (448.55; 650.63)                                  | (206.65; 322.71)                                 |
| 95%CI = Confidence interval at 95% by Bootstrap based on 10,000 samples; Max. = Maximum; Min. = Minimum; SD = Standard deviation. |                                                   |                                                  |
