# Supplementary material for: Effectiveness, safety and costs of the FreeStyle Libre glucose monitoring system for children and adolescents with type 1 diabetes in Spain: a prospective, uncontrolled, pre-post study
Source: PubMed Central journal article supplement — BMJ Open. 2023 Dec 13;13(12):e071334. doi: 10.1136/bmjopen-2022-071334 (PMC10729222; doi:10.1136/bmjopen-2022-071334), 2023-12-13
Supplement: bmjopen-2022-071334supp004.pdf [file bmjopen-2022-071334supp004.pdf]

#### Appendix 4. Evolution of outcome measures during follow-up (by age group and baseline HbA1c control)

|                                                                                          | Baseline    | 3 months    | 6 months    | 12 months   | Differences 12 months-Baseline (95%CI) |
|------------------------------------------------------------------------------------------|-------------|-------------|-------------|-------------|----------------------------------------|
| <b>HbA1c, mean (SD)</b>                                                                  |             |             |             |             |                                        |
| Total                                                                                    | 7.86 (1.36) | 7.58 (1.27) | 7.59 (1.16) | 7.73 (1.06) | -0.13 (-0.42; 0.16)                    |
| HbA1c <7.5%                                                                              | 6.82 (0.36) | 6.86 (0.55) | 6.96 (0.6)  | 7.14 (0.57) | 0.32 (0.15; 0.49)                      |
| HbA1c ≥7.5%                                                                              | 8.65 (1.31) | 8.18 (1.38) | 8.14 (1.25) | 8.2 (1.12)  | -0.45 (-0.84; -0.06)                   |
| <12 years                                                                                | 7.83 (1.17) | 7.42 (0.93) | 7.53 (0.96) | 7.57 (0.8)  | -0.26 (-0.59; 0.07)                    |
| ≥12 years                                                                                | 7.87 (1.45) | 7.66 (1.41) | 7.63 (1.26) | 7.82 (1.19) | -0.05 (-0.45; 0.35)                    |
| <b>With self-reported severe hypoglycaemia, n (%)</b>                                    |             |             |             |             |                                        |
| Total                                                                                    | 49 (31.4)   | -           | -           | 55 (36.9)   | 5.5% (-12.7; 23.7)                     |
| HbA1c <7.5%                                                                              | 26 (38.2)   | -           | -           | 24 (35.3)   | -2.9% (-29.6; 23.8)                    |
| HbA1c ≥7.5%                                                                              | 23 (26.1)   | -           | -           | 31 (38.3)   | 12.2% (-12.6; 37.0)                    |
| <12 years                                                                                | 22 (41.5)   | -           | -           | 19 (37.3)   | -4.2% (-34.1; 25.7)                    |
| ≥12 years                                                                                | 27 (26.2)   | -           | -           | 36 (36.7)   | 10.5% (-12.4; 33.4)                    |
| <b>Nº. Self-reported severe hypoglycaemia, mean (SD)</b>                                 |             |             |             |             |                                        |
| Total                                                                                    | 1.72 (3.65) | -           | -           | 1.77 (5.08) | 0.05 (-0.98; 1.1)                      |
| HbA1c <7.5%                                                                              | 2.34 (4.13) | -           | -           | 1.95 (5.69) | -0.39 (-2.2; 1.4)                      |
| HbA1c ≥7.5%                                                                              | 1.26 (3.19) | -           | -           | 1.63 (4.58) | 0.37 (-0.86; 1.6)                      |
| <12 years                                                                                | 2.12 (4.04) | -           | -           | 1.06 (3.65) | -1.06 (-2.6; 0.48)                     |
| ≥12 years                                                                                | 1.52 (3.43) | -           | -           | 2.20 (5.76) | 0.68 (-0.69; 2.1)                      |
| <b>With severe hypoglycaemia in the electronic clinical record, n (%)</b>                |             |             |             |             |                                        |
| Total                                                                                    | 19 (12.2)   | -           | -           | 23 (15.4)   | 3.2% (-17.6; 24.0)                     |
| HbA1c <7.5%                                                                              | 6 (8.8)     | -           | -           | 6 (8.8)     | 0% (-32.0; 32.0)                       |
| HbA1c ≥7.5%                                                                              | 13 (14.8)   | -           | -           | 17 (21.0)   | 6.2% (-21.1; 33.5)                     |
| <12 years                                                                                | 9 (17.0)    | -           | -           | 6 (11.8)    | -5.2% (-40.8; 30.4)                    |
| ≥12 years                                                                                | 10 (9.7)    | -           | -           | 17 (17.4)   | 7.7% (-0.18; 0.33)                     |
| <b>N.º Hypoglycaemia in the electronic clinical record prior to the study, mean (SD)</b> |             |             |             |             |                                        |
| Total                                                                                    | 0.39 (1.68) | -           | -           | 0.54 (1.58) | 0.15 (-0.23; 0.53)                     |
| HbA1c <7.5%                                                                              | 0.13 (0.45) | -           | -           | 0.25 (1.06) | 0.12 (-0.16; 0.40)                     |
| HbA1c ≥7.5%                                                                              | 0.59 (2.18) | -           | -           | 0.78 (1.88) | 0.19 (-0.43; 0.81)                     |
| <12 years                                                                                | 0.34 (1.02) | -           | -           | 0.61 (1.89) | 0.27 (-0.32; 0.86)                     |
| ≥12 years                                                                                | 0.42 (1.94) | -           | -           | 0.5 (1.40)  | 0.08 (-0.39; 0.55)                     |
| <b>Health-related quality of life (EQ-5D-Y)</b>                                          |             |             |             |             |                                        |
| <b>Mobility (no problems), n (%)</b>                                                     |             |             |             |             |                                        |
| Total                                                                                    | 156 (100)   | -           | -           | 124 (100)   | -                                      |
| HbA1c <7.5%                                                                              | 68 (100)    | -           | -           | 54 (100)    | -                                      |
| HbA1c ≥7.5%                                                                              | 88 (100)    | -           | -           | 70 (100)    | -                                      |
| <12 years                                                                                | 53 (100)    | -           | -           | 47 (100)    | -                                      |
| ≥12 years                                                                                | 103 (100)   | -           | -           | 77 (100)    | -                                      |
| <b>Self-Care (no problems), n (%)</b>                                                    |             |             |             |             |                                        |
| Total                                                                                    | 154 (98.7)  | -           | -           | 123 (99.2)  | -                                      |
| HbA1c <7.5%                                                                              | 67 (98.5)   | -           | -           | 54 (100)    | -                                      |
| HbA1c ≥7.5%                                                                              | 87 (98.9)   | -           | -           | 69 (98.6)   | -                                      |
| <12 years                                                                                | 51 (96.2)   | -           | -           | 47 (100)    | -                                      |
| ≥12 years                                                                                | 103 (100)   | -           | -           | 76 (98.7)   | -                                      |
| <b>Usual Activities (no problems), n (%)</b>                                             |             |             |             |             |                                        |
| Total                                                                                    | 154 (98.7)  | -           | -           | 122 (98.4)  | -                                      |
| HbA1c <7.5%                                                                              | 67 (98.5)   | -           | -           | 53 (98.1)   | -                                      |
| HbA1c ≥7.5%                                                                              | 87 (98.9)   | -           | -           | 69 (98.6)   | -                                      |
| <12 years                                                                                | 53 (100)    | -           | -           | 47 (100)    | -                                      |
| ≥12 years                                                                                | 101 (98.1)  | -           | -           | 75 (97.4)   | -                                      |
| <b>Pain or Discomfort (no pain), n (%)</b>                                               |             |             |             |             |                                        |

|                                                                                                |               |   |   |               |                     |
|------------------------------------------------------------------------------------------------|---------------|---|---|---------------|---------------------|
| Total                                                                                          | 144 (92.3)    | - | - | 118 (95.2)    | -                   |
| HbA1c <7.5%                                                                                    | 62 (91.2)     | - | - | 53 (98.1)     | -                   |
| HbA1c ≥7.5%                                                                                    | 82 (93.2)     | - | - | 65 (92.9)     | -                   |
| <12 years                                                                                      | 50 (94.3)     | - | - | 45 (95.7)     | -                   |
| ≥12 years                                                                                      | 94 (91.3)     | - | - | 73 (94.8)     | -                   |
| <b>Pain or Discomfort (some pain), n (%)</b>                                                   |               |   |   |               |                     |
| Total                                                                                          | 12 (7.7)      | - | - | 6 (4.8)       | -                   |
| HbA1c <7.5%                                                                                    | 6 (8.8)       | - | - | 1 (1.9)       | -                   |
| HbA1c ≥7.5%                                                                                    | 6 (6.8)       | - | - | 5 (7.1)       | -                   |
| <12 years                                                                                      | 3 (5.7)       | - | - | 2 (4.3)       | -                   |
| ≥12 years                                                                                      | 9 (8.7)       | - | - | 4 (5.2)       | -                   |
| <b>Anxiety/Depression (no problems), n (%)</b>                                                 |               |   |   |               |                     |
| Total                                                                                          | 137 (87.8)    | - | - | 112 (90.3)    | -                   |
| HbA1c <7.5%                                                                                    | 62 (91.2)     | - | - | 50 (92.6)     | -                   |
| HbA1c ≥7.5%                                                                                    | 75 (85.2)     | - | - | 62 (88.6)     | -                   |
| <12 years                                                                                      | 49 (92.5)     | - | - | 44 (93.6)     | -                   |
| ≥12 years                                                                                      | 88 (85.4)     | - | - | 68 (88.3)     | -                   |
| <b>Anxiety/Depression (some problems), n (%)</b>                                               |               |   |   |               |                     |
| Total                                                                                          | 16 (10.3)     | - | - | 10 (8.1)      | -                   |
| HbA1c <7.5%                                                                                    | 5 (7.4)       | - | - | 4 (7.4)       | -                   |
| HbA1c ≥7.5%                                                                                    | 11 (12.5)     | - | - | 6 (8.6)       | -                   |
| <12 years                                                                                      | 3 (5.7)       | - | - | 2 (4.3)       | -                   |
| ≥12 years                                                                                      | 13 (12.6)     | - | - | 8 (10.4)      | -                   |
| <b>VAS, mean (SD)</b>                                                                          |               |   |   |               |                     |
| Total                                                                                          | 87.63 (12.46) | - | - | 84.17 (12.28) | -3.5 (-6.4; -0.53)  |
| HbA1c <7.5%                                                                                    | 88.79 (10.05) | - | - | 87.92 (10.08) | 0.29 (-3.9; 4.5)    |
| HbA1c ≥7.5%                                                                                    | 86.74 (14.04) | - | - | 81.29 (16.29) | -7.5 (-11.7; -3.3)  |
| <12 years                                                                                      | 91.66 (9.72)  | - | - | 85.61 (14.97) | -6.1 (-11.0; -1.1)  |
| ≥12 years                                                                                      | 85.56 (13.23) | - | - | 83.27 (13.86) | -2.3 (-6.3; 1.7)    |
| <b>Knowledge of diabetes treatment (modified version of Mitchell questionnaire), mean (SD)</b> |               |   |   |               |                     |
| Total                                                                                          | 11.68 (2.13)  | - | - | 12.09 (1.94)  | 0.41 (-0.11; 0.93)  |
| HbA1c <7.5%                                                                                    | 12.38 (1.98)  | - | - | 12.92 (1.35)  | 0.54 (-0.11; 1.2)   |
| HbA1c ≥7.5%                                                                                    | 11.12 (2.08)  | - | - | 11.38 (2.08)  | 0.26 (-0.45; 0.97)  |
| <12 years                                                                                      | 11.87 (2.07)  | - | - | 11.9 (2.31)   | 0.03 (-0.90; 0.96)  |
| ≥12 years                                                                                      | 11.59 (2.16)  | - | - | 12.21 (1.67)  | 0.62 (-0.001; 1.2)  |
| <b>Diabetes Treatment Satisfaction Questionnaire (DTSQ)</b>                                    |               |   |   |               |                     |
| <b>Perceived hyperglycaemia, mean (SD)</b>                                                     |               |   |   |               |                     |
| Total                                                                                          | 3.53 (1.51)   | - | - | 3.32 (1.44)   | -0.21 (-0.58; 0.16) |
| HbA1c <7.5%                                                                                    | 2.94 (1.28)   | - | - | 2.88 (1.44)   | -0.06 (-0.57; 0.45) |
| HbA1c ≥7.5%                                                                                    | 4.01 (1.51)   | - | - | 3.71 (1.34)   | -0.3 (-0.79; 0.19)  |
| <12 years                                                                                      | 3.62 (1.38)   | - | - | 3.44 (1.48)   | -0.18 (-0.79; 0.43) |
| ≥12 years                                                                                      | 3.48 (1.57)   | - | - | 3.25 (1.42)   | -0.23 (-0.71; 0.25) |
| <b>Perceived hypoglycaemia, mean (SD)</b>                                                      |               |   |   |               |                     |
| Total                                                                                          | 2.22 (1.35)   | - | - | 2.04 (1.32)   | -0.18 (-0.52; 0.16) |
| HbA1c <7.5%                                                                                    | 2.3 (1.36)    | - | - | 2 (1.31)      | -0.3 (-0.80; 0.20)  |
| HbA1c ≥7.5%                                                                                    | 2.15 (1.35)   | - | - | 2.07 (1.34)   | -0.08 (-0.54; 0.38) |
| <12 years                                                                                      | 2.19 (1.17)   | - | - | 2.05 (1.26)   | -0.14 (-0.66; 0.38) |
| ≥12 years                                                                                      | 2.23 (1.44)   | - | - | 2.03 (1.36)   | -0.2 (-0.64; 0.24)  |
| <b>Satisfaction with treatment, mean (SD)</b>                                                  |               |   |   |               |                     |
| Total                                                                                          | 25.89 (6.7)   | - | - | 29.82 (5.44)  | 3.93 (2.4; 5.5)     |
| HbA1c <7.5%                                                                                    | 26.58 (7.04)  | - | - | 29.78 (5.1)   | 3.2 (0.86; 5.5)     |
| HbA1c ≥7.5%                                                                                    | 25.33 (6.41)  | - | - | 29.86 (5.77)  | 4.53 (2.4; 6.6)     |
| <12 years                                                                                      | 25.79 (6.71)  | - | - | 29.61 (5.87)  | 3.82 (1.1; 6.5)     |
| ≥12 years                                                                                      | 25.95 (6.73)  | - | - | 29.96 (5.21)  | 4.01 (2.1; 5.9)     |

|                                                                                                                   | Baseline | 3 months      | 6 months      | 12 months     | Differences 12-3 months (95%CI) |
|-------------------------------------------------------------------------------------------------------------------|----------|---------------|---------------|---------------|---------------------------------|
| <b>Sensor usage time (%), mean (SD)</b>                                                                           |          |               |               |               |                                 |
| Total                                                                                                             | -        | 81.60 (20.78) | 84.42 (19.47) | 88.55 (18.48) | 6.95 (2.3; 11.6)                |
| HbA1c <7.5%                                                                                                       | -        | 83.99 (21.93) | 86.60 (17.2)  | 91.70 (15.09) | 7.71 (0.90; 14.5)               |
| HbA1c ≥7.5%                                                                                                       | -        | 79.63 (19.69) | 82.57 (21.16) | 86.01 (20.57) | 6.38 (-0.8; 12.8)               |
| <12 years                                                                                                         | -        | 87.59 (15.06) | 90.60 (14.34) | 94.51 (11.81) | 6.92 (1.5; 12.3)                |
| ≥12 years                                                                                                         | -        | 78.45 (22.67) | 81.09 (21.07) | 84.85 (20.84) | 6.4 (-0.14; 12.9)               |
| <b>Number of scans per day, mean (SD)</b>                                                                         |          |               |               |               |                                 |
| Total                                                                                                             | -        | 9.16 (5.06)   | 9.33 (4.97)   | 9.84 (6.02)   | 0.68 (-0.64; 2.0)               |
| HbA1c <7.5%                                                                                                       | -        | 10.06 (5.11)  | 9.89 (5.07)   | 10.39 (5.45)  | 0.33 (-1.6; 2.2)                |
| HbA1c ≥7.5%                                                                                                       | -        | 8.41 (4.92)   | 8.85 (4.86)   | 9.39 (6.46)   | 0.98 (-0.87; 2.8)               |
| <12 years                                                                                                         | -        | 11.67 (5.64)  | 11.27 (4.5)   | 12.96 (6.45)  | 1.29 (-1.1; 3.7)                |
| ≥12 years                                                                                                         | -        | 7.83 (4.17)   | 8.27 (4.91)   | 7.90 (4.85)   | 0.07 (-1.3; 1.4)                |
| <b>Number of sensors used, mean (SD)</b>                                                                          |          |               |               |               |                                 |
| Total                                                                                                             | -        | 6.40 (1.36)   | 7.50 (2.86)   | 14.74 (5.81)  | 8.34 (7.4; 9.3)                 |
| HbA1c <7.5%                                                                                                       | -        | 6.32 (1.37)   | 6.86 (1.76)   | 13.35 (4.47)  | 7.03 (5.9; 8.2)                 |
| HbA1c ≥7.5%                                                                                                       | -        | 6.46 (1.36)   | 8.05 (3.46)   | 15.86 (6.51)  | 9.4 (7.9; 10.9)                 |
| <12 years                                                                                                         | -        | 6.63 (1.17)   | 6.90 (2.15)   | 14.73 (5.83)  | 8.1 (6.5; 7.8)                  |
| ≥12 years                                                                                                         | -        | 6.28 (1.44)   | 7.83 (3.15)   | 14.75 (5.83)  | 8.47 (7.3; 9.7)                 |
| SD = standard deviation; VAS = Visual Analogue Scale; HbA1c = Glycosylated Haemoglobin; CI = Confidence Interval. |          |               |               |               |                                 |
