# Supplementary material for: Effectiveness, safety and costs of the FreeStyle Libre glucose monitoring system for children and adolescents with type 1 diabetes in Spain: a prospective, uncontrolled, pre-post study
Source: PubMed Central journal article supplement — BMJ Open. 2023 Dec 13;13(12):e071334. doi: 10.1136/bmjopen-2022-071334 (PMC10729222; doi:10.1136/bmjopen-2022-071334), 2023-12-13
Supplement: bmjopen-2022-071334supp005.pdf [file bmjopen-2022-071334supp005.pdf]

## Appendix 5. Multivariate Mixed Regression Model for Effectiveness Measures and Adherence

| Variable                                          | Self-reported severe hypoglycaemia events                    |      |                                                        |             | Severe hypoglycaemic events in the clinical history          |                 |                                                        |                 | Visual analogue scale (EQ-5D-Y) |                 |                         |                 |                         |                 | Knowledge of diabetes treatment |                 | Diabetes Treatment Satisfaction Questionnaire    |                 |                                                 |                 |                                                     |                 |  |
|---------------------------------------------------|--------------------------------------------------------------|------|--------------------------------------------------------|-------------|--------------------------------------------------------------|-----------------|--------------------------------------------------------|-----------------|---------------------------------|-----------------|-------------------------|-----------------|-------------------------|-----------------|---------------------------------|-----------------|--------------------------------------------------|-----------------|-------------------------------------------------|-----------------|-----------------------------------------------------|-----------------|--|
|                                                   | Patients with hypoglycaemia (Yes/No)<br>Total sample (n=156) |      | Number of self-reported events<br>Total sample (n=156) |             | Patients with hypoglycaemia (Yes/No)<br>Total sample (n=156) |                 | Number of self-reported events<br>Total sample (n=156) |                 | Total sample (n=156)            |                 | HbA1c <7.5% (n=68)      |                 | HbA1c ≥7.5% (n=88)      |                 | Total sample (n=156)            |                 | Perceived hyperglycaemia<br>Total sample (n=156) |                 | Perceived hypoglycaemia<br>Total sample (n=156) |                 | Satisfaction with treatment<br>Total sample (n=156) |                 |  |
|                                                   | OR (95%CI)                                                   | P    | β (95%CI)                                              | P           | OR (95%CI)                                                   | P               | β (95%CI)                                              | P               | B (95%CI)                       | P               | B (95%CI)               | P               | B (95%CI)               | P               | B (95%CI)                       | P               | B (95%CI)                                        | P               | B (95%CI)                                       | P               | B (95%CI)                                           | P               |  |
| <b>Time</b>                                       |                                                              |      |                                                        |             |                                                              |                 |                                                        |                 |                                 |                 |                         |                 |                         |                 |                                 |                 |                                                  |                 |                                                 |                 |                                                     |                 |  |
| M12 (ref: M0)                                     | 0.82<br>(0.35; 1.96)                                         | .659 | -0.37<br>(-0.62; -0.11)                                | <b>.004</b> | 1.47<br>(0.32; 6.77)                                         | .617            | 0.77<br>(-0.06; 1.60)                                  | .069            | -1.40<br>(-4.97; 2.16)          | .440            | -1.33<br>(-4.17; 1.51)  | .359            | -6.03<br>(-9.66; -2.41) | <b>.001</b>     | 0.45<br>(-0.17; 1.08)           | .154            | -0.08<br>(-0.50; 0.34)                           | .721            | -0.23<br>(-0.70; 0.24)                          | .331            | 3.11<br>(0.99; 5.23)                                | <b>.004</b>     |  |
| Duration of T1DM                                  | 1.01<br>(0.89; 1.15)                                         | .850 | -0.01<br>(-0.14; 0.12)                                 | .922        | 0.97<br>(0.81; 1.18)                                         | .806            | -0.05<br>(-0.24; 0.14)                                 | .587            | -0.74<br>(-1.29; -0.19)         | <b>.008</b>     | -0.32<br>(-0.99; 0.35)  | .348            | -1.05<br>(-1.86; -0.24) | <b>.011</b>     | 0.01<br>(-0.08; 0.09)           | .851            | -0.003<br>(-0.06; 0.05)                          | .915            | -0.005<br>(-0.07; 0.06)                         | .870            | 0.05<br>(-0.18; 0.29)                               | .650            |  |
| Presence of comorbidities                         | 0.81<br>(0.33; 1.98)                                         | .641 | 0.26<br>(-0.60; 1.12)                                  | .556        | 0.81<br>(0.26; 2.50)                                         | .710            | 0.27<br>(-0.83; 1.38)                                  | .624            | 0.87<br>(-2.91; 4.64)           | .652            | 2.42<br>(-1.78; 6.63)   | .259            | -1.04<br>(-6.98; 4.89)  | .731            | 0.02<br>(-0.52; 0.57)           | .930            | -0.005<br>(-0.43; 0.42)                          | .980            | 0.02<br>(-0.36; 0.41)                           | .91             | -0.52<br>(-2.15; 1.11)                              | .534            |  |
| Age group: ≥12 years (ref: <12 years)             | 0.56<br>(0.22; 1.42)                                         | .221 | -0.15<br>(-1.04; 0.75)                                 | .745        | 1.32<br>(0.39; 4.44)                                         | .651            | 0.32<br>(-0.87; 1.50)                                  | .599            | -3.11<br>(-6.99; 0.78)          | .117            | -3.84<br>(-8.61; 0.94)  | .115            | -2.82<br>(-8.49; 2.83)  | .327            | -0.09<br>(-0.67; 0.48)          | .705            | -0.05<br>(0.48; 0.38)                            | .819            | -0.002<br>(-0.38; 0.37)                         | .99             | -0.02<br>(-3.24; 0.76)                              | .980            |  |
| Baseline HbA1c group: ≥7.5% (ref: HbA1c <7.5%)    | 0.41<br>(0.15; 1.17)                                         | .097 | -0.57<br>(-1.40; 0.26)                                 | .176        | 2.17<br>(0.53; 8.88)                                         | .280            | 1.54<br>(0.31; 2.77)                                   | <b>.014</b>     | -1.93<br>(-5.98; 2.11)          | .349            |                         |                 |                         |                 | -1.27<br>(-1.89; -0.65)         | <b>&lt;.001</b> | 1.06<br>(0.60; 1.52)                             | <b>&lt;.001</b> | -0.12<br>(-0.57; 0.33)                          | .593            | -1.24<br>(-1.34; 4.22)                              | .225            |  |
| Time*Baseline HbA1c Group (ref: M0 & HbA1c <7.5%) |                                                              |      |                                                        |             |                                                              |                 |                                                        |                 |                                 |                 |                         |                 |                         |                 |                                 |                 |                                                  |                 |                                                 |                 |                                                     |                 |  |
| M12 & HbA1c ≥7.5%                                 | 2.69<br>(0.81; 8.96)                                         | .108 | 0.30<br>(-0.08; 0.68)                                  | .117        | 2.01<br>(0.34; 11.68)                                        | .437            | -0.44<br>(-1.33; 0.45)                                 | .333            | -4.61<br>(-9.44; 0.21)          | <b>.061</b>     |                         |                 |                         |                 | -0.06<br>(-0.90; 0.78)          | .892            | -0.11<br>(-0.70; 0.48)                           | .703            | 0.16<br>(-0.46; 0.78)                           | .615            | 1.44<br>(-1.34; 4.22)                               | .310            |  |
| Intercept                                         | 0.78<br>(0.27; 2.23)                                         | .641 | -0.78<br>(-1.74; 0.17)                                 | .107        | 0.03<br>(0.004; 0.19)                                        | <b>&lt;.001</b> | -4.32<br>(-5.97; -2.67)                                | <b>&lt;.001</b> | 90.50<br>(86.13; 94.87)         | <b>&lt;.001</b> | 90.44<br>(85.92; 94.96) | <b>&lt;.001</b> | 88.92<br>(83.96; 93.88) | <b>&lt;.001</b> | 12.43<br>(11.78; 13.07)         | <b>&lt;.001</b> | 2.98<br>(2.49; 3.46)                             | <b>&lt;.001</b> | 2.29<br>(1.84; 2.74)                            | <b>&lt;.001</b> | 26.80<br>(24.80; 28.81)                             | <b>&lt;.001</b> |  |

CI = Confidence Interval; HbA1c = Glycosylated Haemoglobin; M = Months; OR = Odds Ratio; ref = reference.

| Variable                                                    | Sensor usage time, %     |                 | Number of scans per day |                 | Number of sensors used |                 |                          |                 |                          |                 |
|-------------------------------------------------------------|--------------------------|-----------------|-------------------------|-----------------|------------------------|-----------------|--------------------------|-----------------|--------------------------|-----------------|
|                                                             | Total sample (n=156)     |                 | Total sample (n=156)    |                 | Total sample (n=156)   |                 | HbA1c basal <7.5% (n=68) |                 | HbA1c basal ≥7.5% (n=88) |                 |
|                                                             | B (95%CI)                | P               | B (95%CI)               | P               | B (95%CI)              | P               | B (95%CI)                | P               | B (95%CI)                | P               |
| <b>Time</b>                                                 |                          |                 |                         |                 |                        |                 |                          |                 |                          |                 |
| M6 (ref: M3)                                                | 1.82<br>(-3.31; 6.98)    | .487            | -0.25<br>(-1.41; 0.92)  | .678            | 0.49<br>(-0.58; 1.56)  | .367            | 0.51<br>(-0.37; 1.39)    | .255            | 1.59<br>(0.48; 2.70)     | <b>.005</b>     |
| M12 (ref: M3)                                               | 6.42<br>(1.12; 11.72)    | <b>.018</b>     | 0.30<br>(-0.91; 1.51)   | .625            | 6.96<br>(5.85; 8.06)   | <b>&lt;.001</b> | 6.97<br>(6.06; 7.87)     | <b>&lt;.001</b> | 9.37<br>(8.25; 10.50)    | <b>&lt;.001</b> |
| <b>Duration of T1DM</b>                                     | -1.02<br>(-1.77; -0.27)  | <b>.008</b>     | -0.08<br>(-0.29; 0.13)  | .468            | -0.06<br>(-0.20; 0.07) | .363            | -0.11<br>(-0.25; 0.04)   | .152            | -0.03<br>(-0.24; 0.18)   | .804            |
| <b>Presence of comorbidities</b>                            | 0.53<br>(-4.61; 5.66)    | .840            | -0.69<br>(-2.14; 0.75)  | .348            | -0.35<br>(-1.27; 0.56) | .453            | -0.25<br>(-1.16; 0.66)   | .585            | -0.39<br>(-1.92; 1.14)   | .617            |
| <b>Age group: ≥12 years</b><br>(ref: <12 years)             | -7.93<br>(-13.19; -2.66) | <b>.003</b>     | -3.92<br>(-5.40; -2.43) | <b>&lt;.001</b> | 0.39<br>(-0.55; 1.33)  | .417            | 0.03<br>(-0.98; 1.05)    | .952            | 0.69<br>(-0.77; 2.14)    | .354            |
| <b>Baseline HbA1c group: ≥7.5%</b><br>(ref: HbA1c <7.5%)    | -4.59<br>(-10.71; 1.53)  | .142            | -1.92<br>(-3.52; -0.31) | <b>.019</b>     | 0.12<br>(-1.04; 1.29)  | .836            |                          |                 |                          |                 |
| <b>Time*Baseline HbA1c Group</b><br>(ref: M3 & HbA1c <7.5%) |                          |                 |                         |                 |                        |                 |                          |                 |                          |                 |
| M6 & HbA1c ≥7.5%                                            | 0.38<br>(-6.58; 7.33)    | .915            | 0.43<br>(-1.14; 2.01)   | .590            | 1.09<br>(-0.36; 2.54)  | .141            |                          |                 |                          |                 |
| M12 & HbA1c ≥7.5%                                           | -1.35<br>(-8.48; 5.77)   | .710            | 0.35<br>(-1.28; 1.97)   | .676            | 2.41<br>(0.93; 3.90)   | <b>.001</b>     |                          |                 |                          |                 |
| <b>Intercept</b>                                            | 89.10<br>(82.9; 95.3)    | <b>&lt;.001</b> | 13.0<br>(11.32; 14.68)  | <b>&lt;.001</b> | 6.19<br>(5.04; 7.33)   | <b>&lt;.001</b> | 6.39<br>(5.34; 7.44)     | <b>&lt;.001</b> | 6.13<br>(4.77; 7.49)     | <b>&lt;.001</b> |

CI = Confidence Interval; HbA1c = Glycosylated Haemoglobin; M = Months; ref = reference.
